# Supplementary material
Source: Elsevier journal article supplement (https://zenodo.org/records/10591549/files/mmc4.xlsx)
Supplement: mmc4 [file mmc4.xlsx]

## Sheet: Table
The normalized expression values of human proteins and SARS-CoV-2 mature peptides/proteins identified from Cohorts 1 and 2.
Cohort 1
Accession	Gene	Description	F1T1	F1T2	F1T3	F1T4	F2T1	F2T2	F2T3	F2T4	F3T1	F3T2	F3T3	F3T4	F4T1	F4T2	F4T3	F4T4	F5T1	F5T2	F5T3	F5T4	S1T1	S1T2	S2T1	S2T2	S3T1	S3T2	S4T1	S4T2	S5T1	S5T2	S6T1	S6T2	S7T1	S7T2	M1T1	M1T2	M2T1	M2T2	M3T1	M3T2	M4T1	M4T2	M5T1	M5T2	M6T1	M6T2	M7T1
A0A075B6H7	IGKV3-7	Probable non-functional immunoglobulin kappa variable 3-7 OS=Homo sapiens OX=9606 GN=IGKV3-7 PE=5 SV=1	NA	NA	NA	NA	NA	NA	NA	NA	1.23885	1.57888	1.30315	0.874785	1.34211	1.12584	0.994884	0.779057	1.21596	1.16127	1.5451	1.4023	1.51908	0.729864	3.32418	1.74702	2.22299	2.01545	1.19094	1.17007	1.18296	1.60681	0.817902	0.875634	0.924791	0.87327	0.518315	0.377854	0.397768	0.287234	0.523006	0.451094	0.406126	0.334783	0.382015	0.340541	NA	NA	NA
A0A075B6H9	IGLV4-69	Immunoglobulin lambda variable 4-69 OS=Homo sapiens OX=9606 GN=IGLV4-69 PE=1 SV=1	1.23954	2.05466	2.83628	1.52172	0.819605	0.989382	0.898381	0.847567	0.759962	0.979149	0.811858	0.842355	0.873089	0.910354	0.881663	0.731079	0.863459	1.12498	0.994126	0.916051	0.795647	0.579749	0.537524	0.456821	0.67995	0.727793	0.727995	0.686961	1.06992	1.24764	0.669938	0.551564	0.965535	0.87618	1.29003	1.12405	3.64622	3.33873	0.981527	0.941022	1.02002	0.86814	1.04485	0.84113	1.29199	0.640824	0.704221
A0A075B6I0	IGLV8-61	Immunoglobulin lambda variable 8-61 OS=Homo sapiens OX=9606 GN=IGLV8-61 PE=3 SV=7	0.969626	0.992748	0.581479	0.469957	0.769824	0.659754	0.577823	0.854824	1.16231	1.69302	1.32207	1.03821	1.32749	1.06784	0.795151	0.624468	0.713062	0.7051	1.01066	0.921209	1.12155	0.66154	1.06164	0.777438	0.809835	0.821994	1.04384	0.848331	0.956476	1.29765	0.785564	0.588494	1.36708	1.40201	2.21929	1.65737	1.48123	1.15077	0.957205	0.937376	0.728601	0.557097	0.935818	0.763288	3.01864	0.557986	1.69443
A0A075B6I1	IGLV4-60	Immunoglobulin lambda variable 4-60 OS=Homo sapiens OX=9606 GN=IGLV4-60 PE=3 SV=1	1.04239	1.26383	1.01277	0.611956	0.462524	0.461052	0.443498	0.666834	1.08877	1.38386	1.15853	1.00786	0.76562	0.707744	0.801403	0.540775	1.23225	1.29522	1.22069	1.05709	0.804631	0.747217	0.687151	0.621015	1.11396	1.13792	0.764082	0.572124	0.761808	0.938481	0.87971	0.764082	2.15442	1.7825	3.95232	2.97049	1.87267	1.48865	0.802793	0.763235	0.477542	0.37436	1.40065	1.39281	2.64763	1.04884	1.29999
A0A075B6I4	IGLV10-54	Immunoglobulin lambda variable 10-54 OS=Homo sapiens OX=9606 GN=IGLV10-54 PE=3 SV=1	1.04507	1.15309	0.966137	1.30613	1.01515	0.98473	1.04725	1.31805	0.638873	0.907205	0.702855	0.635164	0.877457	0.760542	0.633932	0.516128	0.83191	0.922934	0.966472	0.799849	0.753354	0.537263	0.581359	0.466064	0.413139	0.542351	0.548324	0.663561	1.19756	1.38732	1.37831	1.30958	0.859876	0.755027	1.21335	1.03742	1.24677	1.3309	0.586783	0.592834	1.08215	0.904818	2.02441	1.49703	1.15357	1.57833	0.931676
A0A075B6I9	IGLV7-46	Immunoglobulin lambda variable 7-46 OS=Homo sapiens OX=9606 GN=IGLV7-46 PE=3 SV=4	0.845748	1.01199	0.847567	0.704905	0.829665	1.10351	0.857317	0.816826	0.863759	1.19201	0.971712	0.980507	1.23628	1.17544	1.07029	0.956078	0.889891	1.07594	1.10328	0.986985	0.845807	0.639581	0.756389	0.633317	0.779327	0.758331	0.896826	0.971173	1.31276	1.56309	0.806083	0.685772	0.832141	0.827998	1.15637	1.089	0.808097	0.706666	0.605333	0.568684	0.90903	0.774695	0.910607	0.865797	1.299	0.721364	0.991785
A0A075B6J1	IGLV5-37	Immunoglobulin lambda variable 5-37 OS=Homo sapiens OX=9606 GN=IGLV5-37 PE=3 SV=1	NA	NA	NA	NA	NA	NA	NA	NA	1.20189	1.59715	1.38127	1.22723	1.33016	1.23473	1.72369	1.48401	NA	NA	NA	NA	NA	NA	NA	NA	3.25758	2.20244	0.836073	1.05724	0.998061	1.1391	0.85601	0.77491	0.791028	0.723417	NA	NA	NA	NA	NA	NA	NA	NA	NA	NA	1.60714	0.74149	1.94733
A0A075B6J2	IGLV2-33	Probable non-functional immunoglobulin lambda variable 2-33 OS=Homo sapiens OX=9606 GN=IGLV2-33 PE=5 SV=2	0.984866	1.21799	0.913451	0.733058	0.854647	0.786981	0.655469	1.26146	1.07676	1.36803	0.973734	0.720065	1.38569	1.09225	0.850805	0.656424	1.26742	1.22112	1.1708	1.11435	1.10611	1.71499	0.786326	0.818412	0.800959	0.626376	1.10826	0.922742	1.15733	1.14401	1.08983	0.850274	0.684205	0.732195	0.741285	0.561594	0.740874	0.498892	0.899628	0.796916	0.736828	0.491104	1.74436	1.48288	0.987053	0.534774	0.911238
A0A075B6J9	IGLV2-18	Immunoglobulin lambda variable 2-18 OS=Homo sapiens OX=9606 GN=IGLV2-18 PE=3 SV=2	0.915543	1.01826	1.39021	0.975896	0.826164	0.760753	0.689489	0.736267	1.02314	1.19201	0.980439	1.00947	1.29774	1.33284	1.06334	0.941544	0.647342	0.792674	0.879222	0.850333	0.854765	0.685011	0.899441	0.892485	0.80157	0.861069	1.00933	1.01129	1.26103	1.34378	1.03728	0.878735	1.32712	1.31358	2.08985	1.68366	1.69044	1.30125	1.02349	1.26769	1.26007	1.18888	1.41843	1.15821	1.89803	0.640735	1.18559
A0A075B6K0	IGLV3-16	Immunoglobulin lambda variable 3-16 OS=Homo sapiens OX=9606 GN=IGLV3-16 PE=3 SV=2	0.742005	0.804576	0.795923	0.95033	1.20497	2.08826	1.65933	1.15645	0.684632	0.978063	0.75597	0.714943	1.40932	1.9844	1.98536	1.49464	1.20455	1.72047	1.30044	1.16272	1.5606	0.996955	1.88165	1.24747	1.21681	1.14544	0.702466	0.762654	0.962861	1.12241	1.57015	1.34901	1.41676	1.26418	0.588739	0.636397	0.93368	0.796916	0.244957	0.277296	0.258798	0.150434	0.358812	0.347552	0.306572	0.258655	0.212996
A0A075B6K2	IGLV3-12	Immunoglobulin lambda variable 3-12 OS=Homo sapiens OX=9606 GN=IGLV3-12 PE=3 SV=2	0.654516	0.670775	0.668037	0.588861	0.837348	0.707646	0.699453	0.986711	NA	NA	NA	NA	NA	NA	NA	NA	NA	NA	NA	NA	NA	NA	NA	NA	NA	NA	NA	NA	NA	NA	NA	NA	NA	NA	2.13155	1.75224	0.872242	0.781761	2.55974	2.84159	1.39668	1.18945	1.14576	1.27377	NA	NA	NA
A0A075B6K4	IGLV3-10	Immunoglobulin lambda variable 3-10 OS=Homo sapiens OX=9606 GN=IGLV3-10 PE=3 SV=2	1.04638	1.0927	1.09407	1.04529	1.21125	2.06279	1.5671	1.2158	0.799794	1.07066	0.906199	0.921847	1.09528	1.33783	1.12553	0.959198	0.742879	0.956741	0.974409	0.865617	0.984457	0.740104	1.55122	1.09703	1.18386	1.29936	0.714101	0.976776	1.07014	1.18559	1.20097	0.935559	1.28058	1.1704	0.58156	0.598822	1.01347	0.812816	0.655015	0.869465	0.751216	0.729207	1.07333	1.07549	0.560039	0.595263	0.456504
A0A075B6K5	IGLV3-9	Immunoglobulin lambda variable 3-9 OS=Homo sapiens OX=9606 GN=IGLV3-9 PE=3 SV=1	0.968887	0.98808	0.92974	0.780949	0.983638	0.892361	1.04478	1.03627	1.29424	1.2612	1.10145	0.9973	1.30967	1.45488	1.32464	1.06858	0.75576	0.880015	0.961794	0.865377	0.906513	0.801348	0.999376	1.07609	1.09954	1.03491	0.852339	0.849744	0.906576	1.15837	0.831737	0.795095	0.899191	0.782249	0.989382	0.838394	0.960595	0.770304	1.04717	1.06452	0.837813	0.701104	1.01544	0.94285	1.44513	1.04536	0.90576
A0A075B6K6	IGLV4-3	Immunoglobulin lambda variable 4-3 OS=Homo sapiens OX=9606 GN=IGLV4-3 PE=3 SV=1	0.965535	8.39366	20.4255	7.96845	1.94154	0.820855	0.257492	0.416648	NA	NA	NA	NA	NA	NA	NA	NA	0.170708	0.224005	0.148311	0.148599	0.101898	0.0730385	0.0820644	0.0849289	0.119427	0.13813	0.115687	0.0967362	0.147931	0.19498	0.122173	0.158077	0.859101	0.741593	0.802181	0.774051	4.41833	5.98064	1.16967	1.21655	0.70427	0.690111	0.693275	0.460541	1.36803	1.32253	1.85061
A0A075B6Q5	IGHV3-64	Immunoglobulin heavy variable 3-64 OS=Homo sapiens OX=9606 GN=IGHV3-64 PE=3 SV=1	0.8791	0.955084	0.800681	0.676002	1.04044	1.88243	2.01168	1.4203	0.617538	0.805859	0.589351	0.617067	0.892176	0.857733	0.805636	0.644119	0.681507	0.744581	0.922615	0.906639	0.819548	0.470478	0.693756	0.650491	0.692315	0.57054	0.672637	0.75487	1.35388	1.48947	1.01621	1.30541	0.596007	0.587272	NA	NA	NA	NA	NA	NA	NA	NA	NA	NA	1.16441	0.737697	1.51519
A0A075B6R2	IGHV4-4	Immunoglobulin heavy variable 4-4 OS=Homo sapiens OX=9606 GN=IGHV4-4 PE=3 SV=2	1.01277	1.17016	1.05001	0.869646	1.29918	1.60893	1.29639	1.27819	0.869104	1.00375	0.854765	0.887857	0.995022	1.20297	1.08065	0.983707	1.10305	1.19309	1.55973	1.22179	1.01213	0.867539	1.08207	0.967746	1.07512	1.19044	0.992611	1.61631	0.958599	1.13721	0.975085	0.932645	1.19798	1.23696	1.13131	1.12631	0.838684	0.872907	0.964197	0.947107	1.12101	1.11853	0.660944	0.565814	NA	NA	NA
A0A075B6S2	IGKV2D-29	Immunoglobulin kappa variable 2D-29 OS=Homo sapiens OX=9606 GN=IGKV2D-29 PE=3 SV=1	1.54253	1.80238	1.52658	0.99654	0.795536	0.64555	0.59704	0.871033	1.32648	1.62597	1.25632	1.14322	1.59185	1.47898	1.24074	1.0122	1.20698	1.26077	1.21647	1.10412	0.87321	0.612211	0.53189	0.516128	0.837813	0.87527	0.650716	0.570145	1.10091	1.50379	0.959198	0.843699	1.0835	1.13847	1.35952	1.07714	1.01473	0.851926	0.630295	0.667806	1.77325	1.52573	0.951978	0.87971	2.01293	0.611151	1.73785
A0A075B6S6	IGKV2D-30	Immunoglobulin kappa variable 2D-30 OS=Homo sapiens OX=9606 GN=IGKV2D-30 PE=3 SV=1	1.49081	1.38242	0.974139	0.663055	0.687485	0.562685	0.418152	0.703148	0.870068	1.1365	0.936792	0.924791	1.1365	1.06888	0.906388	0.867298	0.677879	0.820571	0.913578	0.914719	0.783551	0.47012	0.539539	0.444452	1.01981	0.974139	0.780841	1.44623	1.30342	1.66002	0.783117	0.838336	1.20455	1.13398	NA	NA	NA	NA	NA	NA	NA	NA	NA	NA	NA	NA	NA
A0A087WSY4	IGHV4-30-2	Immunoglobulin heavy variable 4-30-2 OS=Homo sapiens OX=9606 GN=IGHV4-30-2 PE=3 SV=1	1.21773	1.55305	1.48906	1.17585	1.18353	1.18468	1.66821	1.36746	1.12803	1.35407	0.961927	0.796474	0.92351	0.766044	0.8679	0.593163	0.856544	0.884234	1.17862	1.11837	1.07192	1.12685	1.10023	1.00243	0.589351	0.568842	1.02868	1.18987	2.98991	2.49476	0.958201	0.739489	0.949671	0.815977	0.937961	0.826679	0.671147	0.608193	0.807537	0.865677	0.841071	0.699453	0.599321	0.577663	0.849567	0.725627	0.42762
A0A087WSY6	IGKV3D-15	Immunoglobulin kappa variable 3D-15 OS=Homo sapiens OX=9606 GN=IGKV3D-15 PE=3 SV=6	0.838859	1.13383	0.805468	0.724572	0.761703	0.880991	0.616768	1.02619	1.25119	1.32106	0.986438	0.830182	1.67272	1.55585	1.21681	1.0847	NA	NA	NA	NA	NA	NA	NA	NA	0.930385	0.82645	0.865557	0.933874	0.999792	1.15173	1.26164	1.00926	0.959065	0.63728	0.568606	0.303654	0.384139	0.409064	0.570184	0.631257	0.831968	0.745717	0.887857	0.434522	NA	NA	NA
A0A087WSZ0	IGKV1D-8	Immunoglobulin kappa variable 1D-8 OS=Homo sapiens OX=9606 GN=IGKV1D-8 PE=3 SV=6	0.888165	0.856426	0.953893	1.12615	1.04117	1.01508	0.85051	1.06245	NA	NA	NA	NA	NA	NA	NA	NA	NA	NA	NA	NA	NA	NA	NA	NA	1.33441	1.12928	0.964799	1.09931	0.865137	1.12016	1.24738	1.43276	1.23808	0.975964	NA	NA	NA	NA	NA	NA	NA	NA	NA	NA	NA	NA	NA
A0A0A0MRZ9	IGLV5-52	Immunoglobulin lambda variable 5-52 OS=Homo sapiens OX=9606 GN=IGLV5-52 PE=3 SV=1	NA	NA	NA	NA	NA	NA	NA	NA	1.46297	1.76137	1.40483	1.21959	0.86316	0.7103	0.881969	0.541713	1.12967	1.20656	1.10336	1.1391	0.87618	0.730573	1.13249	0.803183	1.02477	1.03068	0.781436	0.766576	1.07453	1.27509	1.0041	1.03541	1.29164	1.23859	1.0887	0.919996	0.72422	0.602277	0.816543	0.657973	1.04095	0.734126	1.05343	1.08975	1.18748	0.804743	0.619811
A0A0A0MS14	IGHV1-45	Immunoglobulin heavy variable 1-45 OS=Homo sapiens OX=9606 GN=IGHV1-45 PE=3 SV=1	1.14195	1.46642	1.08696	0.773729	1.10015	1.38089	0.781815	1.31294	1.34789	1.57407	1.33895	1.0319	1.42583	1.23482	1.04536	1.039	1.90264	1.61519	2.21253	1.58348	2.19664	1.11992	1.06157	1.25119	1.88779	1.73881	1.01305	1.15549	0.98856	1.39639	2.20289	2.72433	1.50974	1.00737	NA	NA	NA	NA	NA	NA	NA	NA	NA	NA	1.3228	1.13611	1.38444
A0A0A0MS15	IGHV3-49	Immunoglobulin heavy variable 3-49 OS=Homo sapiens OX=9606 GN=IGHV3-49 PE=3 SV=1	0.76913	0.867479	0.715687	0.709267	1.28976	2.66678	1.8288	1.24315	1.06393	1.13571	1.01988	1.15573	0.938546	1.35877	1.18945	1.09119	0.78769	1.17854	1.20941	1.0814	0.783932	0.570777	0.946254	0.778949	0.837871	0.888658	1.00042	1.44934	1.01677	1.30514	0.915163	0.829952	0.948684	0.87612	1.15253	1.29621	0.925625	0.923062	0.854173	0.894095	0.729308	0.625421	0.809386	0.844811	1.20899	1.038	1.406
A0A0A0MT36	IGKV6D-21	Immunoglobulin kappa variable 6D-21 OS=Homo sapiens OX=9606 GN=IGKV6D-21 PE=3 SV=1	0.886013	1.02257	0.764612	0.619983	0.799018	0.69602	0.753876	0.983434	1.04543	1.33191	1.09832	0.901126	1.19681	1.0538	0.946911	0.957006	1.02662	1.19657	1.1649	1.04616	0.998684	0.705785	1.2074	0.746544	1.40542	1.15549	1.24427	1.27571	1.10918	1.39281	1.02385	0.937766	0.872665	0.772603	1.04746	0.923318	1.07356	1.01896	1.17487	0.96741	1.65244	1.38578	1.07081	0.750956	1.1632	0.766098	1.38626
A0A0A0MT89	IGKJ1	Immunoglobulin kappa joining 1 OS=Homo sapiens OX=9606 GN=IGKJ1 PE=4 SV=2	NA	NA	NA	NA	NA	NA	NA	NA	1.08493	1.32758	1.01473	0.735654	1.12959	1.14433	0.990068	1.48442	0.787799	0.89807	0.962594	0.928646	1.11365	2.23318	0.820116	0.878491	0.872484	0.821994	0.948619	0.862383	1.14528	1.4104	1.24539	1.12078	0.76913	0.765567	NA	NA	NA	NA	NA	NA	NA	NA	NA	NA	NA	NA	NA
A0A0B4J1U3	IGLV1-36	Immunoglobulin lambda variable 1-36 OS=Homo sapiens OX=9606 GN=IGLV1-36 PE=1 SV=5	0.496718	0.581883	0.693564	0.73037	0.818753	1.13634	1.053	0.948487	NA	NA	NA	NA	NA	NA	NA	NA	1.24117	2.24903	1.50316	1.6529	1.53336	1.53965	1.48772	1.55143	0.925625	0.785346	1.04717	1.40873	1.13194	1.69678	1.19549	1.26813	0.721164	0.676283	1.12397	0.87043	0.671472	0.961194	1.36103	1.38732	0.981051	0.893661	1.32152	1.07773	NA	NA	NA
A0A0B4J1U7	IGHV6-1	Immunoglobulin heavy variable 6-1 OS=Homo sapiens OX=9606 GN=IGHV6-1 PE=3 SV=1	0.991098	1.08945	0.937441	0.717375	1.04884	1.06076	0.841246	0.921784	0.865017	1.04052	0.924279	0.909156	1.14934	1.11752	1.18419	0.853581	0.913451	1.02193	1.12842	1.0654	0.829435	0.603029	0.749396	0.64555	0.949342	0.976776	0.80296	0.831622	0.970904	1.18312	1.16845	1.05658	1.39426	1.17887	1.38252	1.14615	0.968618	0.851808	0.944485	1.05358	2.85324	2.47067	1.02712	0.944092	1.43893	0.885706	1.7783
A0A0B4J1V0	IGHV3-15	Immunoglobulin heavy variable 3-15 OS=Homo sapiens OX=9606 GN=IGHV3-15 PE=3 SV=1	0.93258	1.04456	1.03649	0.861188	0.953695	1.58898	1.45337	1.04623	0.805134	1.1029	0.932774	0.956741	0.964464	1.02861	1.01375	1.00132	0.7946	1.20506	1.32317	1.15581	0.866998	0.633932	1.20372	0.985618	0.64658	0.698146	0.848567	1.18386	0.915226	1.17723	1.13053	0.877761	0.962394	0.868923	1.11814	1.00772	0.712766	0.742725	0.912819	0.888412	1.1487	0.92089	1.15085	1.19673	1.59516	0.742828	0.980303
A0A0B4J1V1	IGHV3-21	Immunoglobulin heavy variable 3-21 OS=Homo sapiens OX=9606 GN=IGHV3-21 PE=1 SV=1	0.911301	1.09013	1.05183	1.05365	1.48123	1.24479	1.33524	1.47212	NA	NA	NA	NA	NA	NA	NA	NA	NA	NA	NA	NA	NA	NA	NA	NA	NA	NA	NA	NA	NA	NA	NA	NA	NA	NA	NA	NA	NA	NA	NA	NA	NA	NA	NA	NA	NA	NA	NA
A0A0B4J1V2	IGHV2-26	Immunoglobulin heavy variable 2-26 OS=Homo sapiens OX=9606 GN=IGHV2-26 PE=3 SV=1	1.07296	1.30116	1.21554	0.961661	0.789822	0.844576	0.687771	0.932386	1.55887	1.56331	1.52605	1.29137	0.981119	1.10282	1.29468	0.919614	0.637192	0.755393	1.04812	0.940957	1.01136	0.810172	0.873815	0.690781	0.709267	0.879893	1.2578	1.96319	0.932774	1.09202	2.69111	1.69173	1.15669	1.08779	0.305237	0.260219	0.568251	0.603197	0.791192	0.851336	0.795206	0.729712	0.783714	0.991648	NA	NA	NA
A0A0B4J1V6	IGHV3-73	Immunoglobulin heavy variable 3-73 OS=Homo sapiens OX=9606 GN=IGHV3-73 PE=3 SV=1	0.866637	0.956343	1.05629	0.528729	0.586377	0.728146	0.516844	0.592464	0.996609	1.21655	0.999238	0.949342	1.19367	1.31896	1.1869	0.959264	0.8923	0.951055	1.09338	0.941283	0.742005	0.510506	0.901126	0.782629	0.826049	0.862024	0.721514	1.03634	0.762284	0.997646	0.812421	0.614933	0.851926	0.766416	1.2585	1.03756	0.85702	0.927423	1.12818	1.13414	1.16199	1.00319	2.01587	1.37345	1.91813	0.532148	1.01642
A0A0B4J1X5	IGHV3-74	Immunoglobulin heavy variable 3-74 OS=Homo sapiens OX=9606 GN=IGHV3-74 PE=3 SV=1	0.778355	0.973397	0.749292	0.561205	0.924279	1.42415	1.23885	0.917894	0.67929	1.03426	0.797192	0.947764	0.994194	1.28654	1.22944	0.945599	0.834451	1.25858	1.23063	1.11651	0.950593	1.01129	0.933939	0.79196	0.756808	0.7452	0.882275	0.955945	0.993988	1.30622	1.11226	1.12506	0.888473	0.797414	0.74701	0.794545	0.737697	0.959131	0.698146	0.756232	1.3207	1.03011	1.11721	1.04138	0.874542	0.595965	0.762865
A0A0B4J1X8	IGHV3-43	Immunoglobulin heavy variable 3-43 OS=Homo sapiens OX=9606 GN=IGHV3-43 PE=3 SV=1	0.942066	1.1414	0.885522	0.72427	1.07244	1.64285	1.7061	1.42415	1.07393	1.2626	1.10412	1.11003	1.24522	1.23593	1.27961	1.12803	1.15261	1.29711	1.46074	1.35943	1.48216	0.973532	1.47509	1.13839	1.2234	1.13296	1.41824	1.2963	1.01143	1.31021	1.00222	0.863998	0.923894	0.94875	0.541337	0.439367	0.314777	0.246097	0.307466	0.342008	0.282633	0.213899	0.314188	0.322216	0.366631	0.350601	0.317318
A0A0B4J1Y8	IGLV9-49	Immunoglobulin lambda variable 9-49 OS=Homo sapiens OX=9606 GN=IGLV9-49 PE=1 SV=1	0.685629	0.907645	1.1846	0.837058	0.966874	1.40367	1.26822	1.10061	0.951516	1.08968	0.977318	1.21302	1.48679	2.02581	1.78931	1.22961	0.660623	0.769024	0.879283	0.847098	0.973667	0.762231	0.785291	0.649049	0.760068	0.866757	0.799461	0.844986	1.02655	1.15501	0.889212	0.650445	0.846804	0.73316	2.02399	1.92666	1.07319	1.35642	0.452535	0.575066	1.825	1.81114	0.96976	0.894963	1.50306	0.969021	0.728197
A0A0B4J1Y9	IGHV3-72	Immunoglobulin heavy variable 3-72 OS=Homo sapiens OX=9606 GN=IGHV3-72 PE=3 SV=1	1.20339	1.28103	1.06947	0.801348	1.05292	0.948947	0.76945	0.938351	1.13312	1.33237	1.03886	0.936467	1.19507	1.1483	0.974004	0.790699	0.991579	1.18296	1.21926	1.15445	1.03104	0.653428	0.90689	0.755446	1.22731	1.11358	0.747321	0.790589	1.09809	1.38761	0.784856	0.709267	0.941283	0.949276	1.0654	0.829377	1.12225	1.00877	0.712371	0.723869	0.960195	0.836188	1.18583	1.045	1.79241	0.686723	1.64479
A0A0C4DH24	IGKV6-21	Immunoglobulin kappa variable 6-21 OS=Homo sapiens OX=9606 GN=IGKV6-21 PE=3 SV=1	0.906325	1.10084	0.738311	0.656606	1.4289	1.56103	1.05607	1.07445	1.06113	1.20255	0.989862	0.867118	1.01565	1.04935	0.917513	0.705687	0.83001	1.01354	1.06106	0.991854	0.873149	0.572481	1.36907	1.13776	1.00898	0.926203	0.9584	1.15517	0.619811	0.972588	0.376077	0.380904	0.7051	0.71242	0.533108	0.556402	0.530087	0.378982	0.280797	0.250191	0.401925	0.303275	0.809667	0.692267	1.4904	0.738874	0.388584
A0A0C4DH25	IGKV3D-20	Immunoglobulin kappa variable 3D-20 OS=Homo sapiens OX=9606 GN=IGKV3D-20 PE=3 SV=1	1.0309	0.981663	0.801903	0.74149	1.07587	1.23619	1.32556	1.2201	1.19681	1.45478	1.11111	0.974747	1.33247	1.16845	0.967343	0.709808	0.912565	0.878552	1.19565	1.12584	0.96788	0.753145	0.754713	0.646804	0.869345	1.12857	0.836594	0.976235	0.917831	1.12826	0.811465	0.729055	0.641135	0.653201	0.857971	0.748513	0.67371	0.549465	0.937181	0.888535	0.937051	0.779219	1.04442	0.881175	1.48937	1.00424	1.47877
A0A0C4DH29	IGHV1-3	Immunoglobulin heavy variable 1-3 OS=Homo sapiens OX=9606 GN=IGHV1-3 PE=3 SV=1	0.733058	0.98432	0.907582	0.932774	1.02257	0.966807	0.900564	1.23268	0.240982	0.354117	0.262393	0.320901	0.267646	0.290116	0.294267	0.317032	1.16708	0.726684	0.67399	0.927423	1.24531	1.56255	1.33459	1.23225	0.463615	1.19028	0.822507	0.678255	1.32033	0.61489	1.70728	0.580795	1.36009	0.670496	NA	NA	NA	NA	NA	NA	NA	NA	NA	NA	NA	NA	NA
A0A0C4DH31	IGHV1-18	Immunoglobulin heavy variable 1-18 OS=Homo sapiens OX=9606 GN=IGHV1-18 PE=3 SV=1	0.819093	1.02648	0.981663	0.774212	0.972116	1.13367	1.00744	0.926267	0.807817	0.990755	0.962394	1.33154	1.10734	1.22901	1.32611	1.57636	1.08606	1.31613	1.32088	1.28271	1.15389	1.06312	1.05132	0.939523	1.06533	1.03634	0.960661	1.3551	1.11219	1.2669	1.10719	1.12194	1.01319	0.980847	0.425108	0.468201	0.371929	0.406492	0.346061	0.368567	0.367165	0.403377	0.663239	0.66209	0.394966	0.363619	0.48337
A0A0C4DH32	IGHV3-20	Immunoglobulin heavy variable 3-20 OS=Homo sapiens OX=9606 GN=IGHV3-20 PE=3 SV=2	0.763447	0.940696	0.89094	0.82863	0.860472	1.03605	0.962194	0.960262	0.809274	1.03333	0.992817	0.94573	1.14782	1.36585	2.73568	4.04405	1.29155	2.23721	1.60815	1.51582	0.890446	0.830067	1.11798	0.916242	1.44403	2.60106	1.06807	1.21985	0.844401	1.09992	1.37497	1.29477	0.815185	0.725778	3.90954	1.9414	0.593492	0.619897	0.453005	0.362788	0.878918	0.757176	0.411339	0.341013	0.432718	0.58719	0.568645
A0A0C4DH33	IGHV1-24	Immunoglobulin heavy variable 1-24 OS=Homo sapiens OX=9606 GN=IGHV1-24 PE=3 SV=1	0.490559	0.731738	0.645997	0.505191	1.01305	2.9598	2.04019	1.07699	0.594604	0.86814	0.949079	1.13768	1.01431	1.16578	1.82678	1.6218	0.499861	1.14989	0.906765	0.89695	0.978199	0.623733	0.769557	0.600277	1.40903	1.68203	1.25449	1.12857	1.02712	1.25015	1.37936	1.45902	1.06673	1.07691	0.488828	0.68639	0.468493	0.521739	0.486496	0.435698	0.55275	0.586133	0.566206	0.555323	NA	NA	NA
A0A0C4DH34	IGHV4-28	Immunoglobulin heavy variable 4-28 OS=Homo sapiens OX=9606 GN=IGHV4-28 PE=3 SV=1	0.929225	1.0643	0.912565	0.70647	0.97522	1.09634	1.18723	1.0887	1.04073	1.33552	0.993643	0.735247	1.41804	1.36122	1.25719	1.07691	0.92871	1.12576	1.18493	1.09255	1.32253	1.01017	0.833353	0.698533	0.985481	0.968148	0.847391	0.930192	1.08538	1.35182	0.921464	0.837406	0.897386	0.832949	1.8405	1.36509	0.781111	0.573633	0.977454	1.01544	1.13966	0.980167	0.946517	0.824619	1.33654	1.11342	1.88766
A0A0C4DH35	IGHV3-35	Probable non-functional immunoglobulin heavy variable 3-35 OS=Homo sapiens OX=9606 GN=IGHV3-35 PE=5 SV=1	1.14322	1.27845	0.920826	0.775017	1.28405	1.19582	1.15349	1.35754	1.10596	1.46652	1.07631	0.912186	1.43217	1.31203	1.32657	1.04355	1.0615	1.33173	1.28842	1.26304	0.913515	0.996955	0.842997	1.01776	NA	NA	NA	NA	NA	NA	NA	NA	NA	NA	1.2505	0.88203	1.02619	0.843582	1.73544	1.67377	1.47182	1.0141	1.67853	1.01924	1.4837	0.865737	1.40717
A0A0C4DH36	IGHV3-38	Probable non-functional immunoglobulin heavy variable 3-38 OS=Homo sapiens OX=9606 GN=IGHV3-38 PE=5 SV=1	0.974072	1.10596	0.941674	0.831392	1.25823	1.11899	1.03498	1.14822	1.07281	1.21008	1.17495	1.09558	1.42741	1.45035	1.2544	0.988971	1.0838	1.12482	1.32326	1.24513	1.19881	0.853226	1.20364	0.92492	0.978606	0.968148	0.984116	1.02101	1.12912	1.32869	0.994332	0.830758	0.899129	0.832718	0.861546	0.866998	0.732144	0.646445	0.903189	0.717525	0.766204	0.617752	1.0018	0.839557	1.45246	0.645281	0.908841
A0A0C4DH38	IGHV5-51	Immunoglobulin heavy variable 5-51 OS=Homo sapiens OX=9606 GN=IGHV5-51 PE=3 SV=1	0.944354	1.17838	1.11907	1.2084	1.15613	1.56439	1.41402	1.36557	0.848684	1.14148	0.984593	0.909787	1.34733	1.46978	1.55909	1.47662	1.03555	1.40717	1.41676	1.29298	0.899067	0.586417	0.911491	0.809554	1.51225	1.36339	1.25015	1.47734	1.10023	1.31294	1.0334	0.926845	1.22239	1.07185	0.733363	0.602695	0.661953	0.51242	0.566913	0.641446	0.499134	0.490798	0.751737	0.64403	1.40639	1.07878	1.52341
A0A0C4DH39	IGHV1-58	Immunoglobulin heavy variable 1-58 OS=Homo sapiens OX=9606 GN=IGHV1-58 PE=3 SV=1	0.861307	1.57113	1.25423	0.93368	0.952704	1.17723	0.943307	1.00856	0.679479	0.905006	0.730927	0.640646	0.993437	0.964665	0.740104	0.893104	0.635957	0.927166	1.2033	1.10099	1.11752	0.463133	0.720065	0.566678	0.726382	NA	1.10183	1.1897	0.624685	0.886935	1.49019	NA	0.992955	NA	NA	NA	NA	NA	NA	NA	NA	NA	NA	NA	NA	NA	NA
A0A0C4DH43	IGHV2-70D	Immunoglobulin heavy variable 2-70D OS=Homo sapiens OX=9606 GN=IGHV2-70D PE=3 SV=1	0.693035	0.849037	0.605333	0.517166	0.999446	1.28289	1.52119	1.35557	0.760279	1.00312	0.878126	0.931288	1.59538	2.02722	1.93442	1.3807	0.914402	0.921592	1.08945	0.922039	0.831046	0.66725	0.886136	0.775286	1.15629	1.21209	1.0811	1.32629	0.975829	1.24755	1.26365	1.02385	1.03864	1.0304	0.751268	0.680233	1.21681	1.24651	0.685772	0.727389	0.88632	0.79769	1.04102	1.17479	1.17479	1.40786	0.842705
A0A0C4DH68	IGKV2-24	Immunoglobulin kappa variable 2-24 OS=Homo sapiens OX=9606 GN=IGKV2-24 PE=3 SV=1	0.792674	0.896764	0.691164	0.597578	1.29918	3.17906	1.92692	1.26593	0.871275	1.13548	0.988149	1.19947	1.11543	1.12849	1.83808	2.03736	0.779867	0.882642	1.2999	1.14346	1.09551	2.28263	1.0841	1.22374	0.857971	1.0643	0.773193	1.60837	0.896826	1.20314	0.608361	0.564091	0.822906	0.821595	0.680799	0.575146	0.43712	0.421411	0.583417	0.596585	0.811352	0.642781	0.824276	0.942785	1.27996	0.601276	0.640158
A0A0G2JMI3	IGHV1-69-2	Immunoglobulin heavy variable 1-69-2 OS=Homo sapiens OX=9606 GN=IGHV1-69-2 PE=3 SV=2	1.54971	2.78697	2.20152	1.69056	0.37036	NA	NA	NA	1.1414	1.22366	1.31421	1.28752	0.58362	0.506242	0.393736	0.381248	0.984116	1.31339	1.35116	1.55822	1.33969	1.15301	1.31248	1.08425	NA	NA	NA	NA	NA	NA	NA	NA	NA	NA	NA	NA	NA	NA	NA	NA	NA	NA	NA	NA	NA	NA	NA
A0A0G2JS06	IGLV5-39	Immunoglobulin lambda variable 5-39 OS=Homo sapiens OX=9606 GN=IGLV5-39 PE=3 SV=1	1.03218	1.14536	0.745614	0.543593	0.74185	0.863998	0.65738	0.768438	0.911807	1.01572	0.784421	0.784584	0.883193	1.02633	0.603238	0.513487	0.742365	0.668871	0.819718	0.888042	2.97605	2.15547	1.94491	1.82046	0.380799	0.34917	0.401675	0.342387	1.2713	1.6057	0.859042	0.598283	0.579347	0.516987	1.20497	1.02427	0.581439	0.557638	0.334575	0.427116	1.45791	1.32859	1.13069	1.03864	1.61989	0.727944	1.14528
A0A0J9YVY3	IGHV7-4-1	Immunoglobulin heavy variable 7-4-1 OS=Homo sapiens OX=9606 GN=IGHV7-4-1 PE=3 SV=1	0.921273	0.755236	0.951582	0.656561	0.798963	1.03426	1.16853	0.841305	1.06992	2.00222	0.780678	1.75844	0.608741	1.54885	NA	NA	0.814959	1.0952	0.704075	1.13839	0.746337	1.44754	0.671705	NA	1.03534	1.25006	0.896142	0.710595	1.11806	1.26383	1.37259	1.14647	1.39156	1.35416	NA	NA	NA	NA	NA	NA	NA	NA	NA	NA	NA	NA	NA
A0A0J9YX35	IGHV3-64D	Immunoglobulin heavy variable 3-64D OS=Homo sapiens OX=9606 GN=IGHV3-64D PE=3 SV=1	0.890569	1.05475	4.16409	4.53028	1.19706	1.40435	1.12194	0.958865	0.462428	0.54601	0.401731	0.426377	0.478171	0.532702	0.376077	0.346013	0.587516	0.622049	0.644343	0.625161	0.576024	0.501388	0.563778	0.482801	0.614293	0.702807	0.933551	1.01523	0.908337	1.10926	0.71168	0.691739	0.828917	0.718271	0.271966	0.344625	0.289172	0.240949	0.312256	0.332886	0.303864	0.258637	0.259949	0.226597	0.356087	0.277258	0.260165
A0A0J9YXX1	IGHV5-10-1	Immunoglobulin heavy variable 5-10-1 OS=Homo sapiens OX=9606 GN=IGHV5-10-1 PE=3 SV=1	0.871517	1.33201	1.08734	0.87321	1.45549	1.83439	1.67528	1.57527	0.354461	0.811577	0.635428	0.520222	0.921528	0.635736	0.432329	0.32493	0.730826	1.00298	1.38281	1.18764	0.91187	0.450813	1.05841	0.943962	0.276203	0.343385	1.43415	1.73773	1.18665	1.6289	0.371697	0.390745	0.988902	0.840605	1.32015	1.24134	1.46054	1.25745	1.25249	1.91269	1.14203	1.13705	1.70669	1.39397	0.934004	0.933421	0.806474
A0M8Q6	IGLC7	Immunoglobulin lambda constant 7 OS=Homo sapiens OX=9606 GN=IGLC7 PE=1 SV=3	0.522209	0.643316	0.488998	0.406915	0.783986	1.15717	0.996678	0.977996	0.783389	1.04645	0.804576	0.816939	1.41225	1.47488	1.54456	1.34994	0.733618	0.839906	0.944027	0.859101	0.767107	0.54397	0.474869	0.462107	1.36197	1.23234	1.09916	1.12904	0.653383	0.893971	0.689633	0.644834	0.810846	0.753563	1.01875	0.870309	1.65393	1.50702	1.34248	1.42939	1.45186	1.24755	0.547223	0.487002	1.43167	0.447388	0.548666
A1L4H1	SSC5D	Soluble scavenger receptor cysteine-rich domain-containing protein SSC5D OS=Homo sapiens OX=9606 GN=SSC5D PE=1 SV=3	0.522354	0.663515	0.830758	0.634196	0.773836	1.05059	1.06032	0.759225	1.10282	1.08282	1.15725	1.48566	1.18937	1.49174	1.40922	1.46815	0.850215	1.23876	0.979828	0.998061	1.0184	1.21201	1.27015	1.3765	1.38473	1.38099	1.66094	1.69126	1.19914	1.3521	1.33358	1.14822	1.32015	1.06866	0.852635	0.668315	0.902626	0.832718	0.851985	0.873149	0.961927	1.00417	0.906702	0.765779	NA	NA	NA
A4UGR9	XIRP2	Xin actin-binding repeat-containing protein 2 OS=Homo sapiens OX=9606 GN=XIRP2 PE=1 SV=2	0.944616	1.06238	1.10229	1.23089	1.18427	1.19764	1.47806	1.07594	NA	NA	NA	NA	NA	NA	NA	NA	NA	NA	NA	NA	NA	NA	NA	NA	NA	NA	NA	NA	NA	NA	NA	NA	NA	NA	1.85536	1.16554	0.653156	0.493424	0.999238	1.02321	0.874057	0.704856	1.32079	1.06061	0.867779	0.687485	0.869525
A8MW99	MEI4	Meiosis-specific protein MEI4 OS=Homo sapiens OX=9606 GN=MEI4 PE=3 SV=2	0.976505	1.06918	0.867599	1.10504	1.24868	1.13155	1.22876	1.24237	0.984662	1.05753	0.959597	0.998476	1.06688	1.12638	0.971914	1.03965	0.751737	0.917131	1.02264	1.16199	0.924727	0.846452	0.822336	1.09551	NA	NA	NA	NA	NA	NA	NA	NA	NA	NA	NA	NA	NA	NA	NA	NA	NA	NA	NA	NA	1.38309	0.608994	1.19698
B1AJZ9	FHAD1	Forkhead-associated domain-containing protein 1 OS=Homo sapiens OX=9606 GN=FHAD1 PE=2 SV=2	NA	NA	NA	NA	NA	NA	NA	NA	NA	NA	NA	NA	NA	NA	NA	NA	NA	NA	NA	NA	NA	NA	NA	NA	0.833815	0.848743	0.50052	0.453634	1.16119	1.28574	0.896826	1.23919	1.73989	1.47928	2.74499	1.86167	1.56852	1.51278	1.37364	1.22408	1.38905	1.07482	1.27899	1.06622	1.08689	0.566953	0.852812
O00151	PDLIM1	PDZ and LIM domain protein 1 OS=Homo sapiens OX=9606 GN=PDLIM1 PE=1 SV=4	1.04725	0.722315	1.06592	0.934781	1.03147	0.7946	0.808041	0.662917	1.33321	0.63534	1.0237	0.832487	1.15525	0.67399	0.777277	0.514413	1.07646	0.816203	0.603908	0.688773	1.02676	1.05687	0.726432	0.897323	1.64353	0.746596	0.987122	0.848508	1.07654	0.874118	0.498788	2.03863	0.679667	1.65187	0.73596	1.65967	0.743034	1.76982	0.895584	0.843874	0.866457	1.63071	0.932193	1.82437	0.298541	0.671519	0.300326
O00161	SNAP23	Synaptosomal-associated protein 23 OS=Homo sapiens OX=9606 GN=SNAP23 PE=1 SV=1	NA	NA	NA	NA	NA	NA	NA	NA	NA	NA	NA	NA	NA	NA	NA	NA	0.729005	0.822507	0.966941	0.99903	0.745614	0.885092	0.893909	1.01868	NA	NA	NA	NA	NA	NA	NA	NA	NA	NA	NA	NA	NA	NA	NA	NA	NA	NA	NA	NA	NA	NA	NA
O00187	MASP2	Mannan-binding lectin serine protease 2 OS=Homo sapiens OX=9606 GN=MASP2 PE=1 SV=4	0.836768	0.547299	0.758647	1.15693	0.898942	0.857317	0.818299	0.623387	1.00842	0.966003	0.831392	1.10842	0.973869	1.33561	0.924535	0.999861	0.997784	0.866577	0.805524	1.07408	1.09104	1.04001	1.48865	1.10988	0.894343	1.15149	1.04066	0.740155	1.10535	0.886075	1.11558	0.741336	0.934716	0.750279	0.824676	1.23063	1.35144	1.04761	0.53444	0.897883	0.859578	1.04196	1.21125	0.956542	1.49786	1.33533	2.09188
O00233	PSMD9	26S proteasome non-ATPase regulatory subunit 9 OS=Homo sapiens OX=9606 GN=PSMD9 PE=1 SV=3	1.27244	1.75979	1.77325	1.32629	1.2234	1.46206	1.32409	1.23885	NA	NA	NA	NA	NA	NA	NA	NA	NA	NA	NA	NA	NA	NA	NA	NA	NA	NA	NA	NA	NA	NA	NA	NA	NA	NA	NA	NA	NA	NA	NA	NA	NA	NA	NA	NA	NA	NA	NA
O00299	CLIC1	Chloride intracellular channel protein 1 OS=Homo sapiens OX=9606 GN=CLIC1 PE=1 SV=4	0.912755	0.510471	0.694766	1.09718	0.677222	0.583579	0.560233	0.692075	1.79142	0.712321	1.00926	0.891743	0.861845	0.740361	0.620972	0.55756	1.43068	0.694189	0.694959	0.881847	0.978809	1.20439	0.861905	0.965869	1.19466	1.0279	0.949803	0.723417	1.69584	0.70853	0.645594	0.585727	0.858089	1.03562	0.662779	1.92639	1.27324	2.78138	1.23431	1.28058	0.94783	2.16595	1.4837	2.1598	1.11713	1.23004	1.11342
O00391	QSOX1	Sulfhydryl oxidase 1 OS=Homo sapiens OX=9606 GN=QSOX1 PE=1 SV=3	1.01003	0.921145	1.01508	0.942719	1.21243	0.928646	1.02378	0.855061	0.981459	0.933809	0.965401	1.07751	1.00452	1.14743	1.0674	1.29244	0.887611	0.976776	0.985754	1.10642	0.950198	1.09051	1.07007	1.02456	1.03677	1.15565	1.16829	0.980643	0.850156	0.850215	1.16151	0.980099	1.10918	1.17308	1.27978	1.04608	1.02045	0.909219	1.04659	1.13233	1.20339	1.04073	0.994608	0.908463	0.911744	0.974545	0.980847
O00429	DNM1L	Dynamin-1-like protein OS=Homo sapiens OX=9606 GN=DNM1L PE=1 SV=2	NA	NA	NA	NA	NA	NA	NA	NA	NA	NA	NA	NA	NA	NA	NA	NA	NA	NA	NA	NA	NA	NA	NA	NA	2.47684	1.38204	2.65645	3.1943	2.91865	1.91149	5.11133	6.33876	2.87488	2.54877	0.93103	2.54242	1.09119	2.53731	0.992955	1.25727	1.22154	2.47838	1.32253	1.94666	1.02904	1.48298	1.13453
O00468	AGRN	Agrin OS=Homo sapiens OX=9606 GN=AGRN PE=1 SV=6	NA	NA	NA	NA	NA	NA	NA	NA	NA	NA	NA	NA	NA	NA	NA	NA	0.643495	0.657289	1.18165	1.08983	0.809162	1.074	1.15149	1.20339	0.756599	0.915543	1.29936	1.21698	0.778733	0.912123	1.00326	1.299	1.10926	0.850746	NA	NA	NA	NA	NA	NA	NA	NA	NA	NA	NA	NA	NA
O00533	CHL1	Neural cell adhesion molecule L1-like protein OS=Homo sapiens OX=9606 GN=CHL1 PE=1 SV=4	0.698146	0.786544	0.76945	0.735145	0.77164	0.735043	0.817845	0.793609	1.10473	1.2404	1.13587	1.12584	1.13997	1.07044	1.0527	1.09817	0.923894	1.08313	0.946058	0.903815	1.01551	1.05424	1.03692	1.01847	1.00507	1.15149	1.2018	1.12233	0.941544	0.997646	1.15829	1.19623	1.38147	1.50901	1.0179	0.888904	1.23499	0.926652	0.972251	1.02733	0.774319	0.779003	0.71163	0.760911	1.07363	0.978199	0.875573
O00592	PODXL	Podocalyxin OS=Homo sapiens OX=9606 GN=PODXL PE=1 SV=2	NA	NA	NA	NA	NA	NA	NA	NA	0.86089	1.20882	1.02747	0.952968	2.06137	2.78755	3.05972	2.66383	0.858446	0.893847	0.881969	0.856544	0.718819	0.904944	0.894405	0.851395	0.865077	0.971307	1.09475	0.984252	0.880564	1.21251	1.0367	1.12257	0.9214	1.09013	NA	NA	NA	NA	NA	NA	NA	NA	NA	NA	NA	NA	NA
O14498	ISLR	Immunoglobulin superfamily containing leucine-rich repeat protein OS=Homo sapiens OX=9606 GN=ISLR PE=2 SV=1	NA	NA	NA	NA	NA	NA	NA	NA	0.873573	0.99	0.769184	0.931805	0.942131	0.994608	0.859578	0.899752	0.517381	0.628376	0.617966	0.54802	0.8307	0.836073	0.851867	1.03577	NA	NA	NA	NA	NA	NA	NA	NA	NA	NA	NA	NA	NA	NA	NA	NA	NA	NA	NA	NA	NA	NA	NA
O14745	SLC9A3R1	Na(+)/H(+) exchange regulatory cofactor NHE-RF1 OS=Homo sapiens OX=9606 GN=SLC9A3R1 PE=1 SV=4	NA	NA	NA	NA	NA	NA	NA	NA	NA	NA	NA	NA	NA	NA	NA	NA	NA	NA	NA	NA	NA	NA	NA	NA	NA	NA	NA	NA	NA	NA	NA	NA	NA	NA	NA	NA	NA	NA	NA	NA	NA	NA	NA	NA	1.3463	1.61844	1.1299
O14786	NRP1	Neuropilin-1 OS=Homo sapiens OX=9606 GN=NRP1 PE=1 SV=3	0.783823	0.917004	0.989451	1.09391	0.930708	1.26716	1.18509	1.05241	0.7803	0.847979	0.725778	0.864357	0.873997	0.97786	0.828802	0.823192	0.928517	1.04167	0.891681	1.0289	0.953497	0.9973	1.08666	1.15942	0.909282	0.833411	1.00055	0.917703	0.971442	0.965133	0.991373	0.779489	0.824848	0.766522	1.19657	1.05001	1.11597	0.836478	0.984935	1.03011	1.51835	1.46866	0.880564	1.03965	NA	NA	NA
O14791	APOL1	Apolipoprotein L1 OS=Homo sapiens OX=9606 GN=APOL1 PE=1 SV=5	0.825477	0.741696	0.872605	1.00173	1.10137	0.936597	0.965066	1.05548	0.728904	0.788018	0.691835	0.621101	0.846921	0.920315	0.74551	0.892733	0.81214	0.879344	0.571926	0.596668	0.748098	0.838626	0.947567	0.973869	1.95274	1.86193	1.00465	1.15133	0.935429	1.12803	0.934975	1.10849	1.19061	1.23396	1.39271	1.17552	1.19756	0.977386	1.32528	1.21521	1.23954	1.12016	1.43505	1.2812	0.733923	0.979828	1.10076
O14818	PSMA7	Proteasome subunit alpha type-7 OS=Homo sapiens OX=9606 GN=PSMA7 PE=1 SV=1	1.25797	0.824333	0.867659	0.954621	1.29936	2.21315	1.45599	1.38386	NA	NA	NA	NA	NA	NA	NA	NA	1.23038	1.32602	1.55606	1.44944	1.30252	1.19856	1.30134	2.00639	NA	NA	NA	NA	NA	NA	NA	NA	NA	NA	NA	NA	NA	NA	NA	NA	NA	NA	NA	NA	NA	NA	NA
O15031	PLXNB2	Plexin-B2 OS=Homo sapiens OX=9606 GN=PLXNB2 PE=1 SV=3	NA	NA	NA	NA	NA	NA	NA	NA	NA	NA	NA	NA	NA	NA	NA	NA	1.141	1.29388	1.42791	1.39069	1.34174	0.860114	1.41088	1.24531	NA	NA	NA	NA	NA	NA	NA	NA	NA	NA	NA	NA	NA	NA	NA	NA	NA	NA	NA	NA	NA	NA	NA
O15143	ARPC1B	Actin-related protein 2/3 complex subunit 1B OS=Homo sapiens OX=9606 GN=ARPC1B PE=1 SV=3	NA	NA	NA	NA	NA	NA	NA	NA	NA	NA	NA	NA	NA	NA	NA	NA	NA	NA	NA	NA	NA	NA	NA	NA	1.04182	0.941283	0.867539	1.15085	1.22086	1.21092	0.81898	1.40425	0.952044	1.07348	NA	NA	NA	NA	NA	NA	NA	NA	NA	NA	0.859578	0.684964	1.0546
O15144	ARPC2	Actin-related protein 2/3 complex subunit 2 OS=Homo sapiens OX=9606 GN=ARPC2 PE=1 SV=1	NA	NA	NA	NA	NA	NA	NA	NA	0.997162	0.778625	0.951648	0.869646	0.905948	0.78769	0.811071	0.626853	1.22171	0.968618	0.983707	0.888596	0.988971	1.016	1.04536	1.05365	1.14417	0.908589	0.777223	0.822792	0.892609	0.878613	0.807817	1.00905	0.723467	0.793114	0.599903	1.21698	0.649319	1.36396	0.861307	0.659708	0.762072	1.26427	0.896888	1.38022	0.921847	1.34211	1.0587
O15389	SIGLEC5	Sialic acid-binding Ig-like lectin 5 OS=Homo sapiens OX=9606 GN=SIGLEC5 PE=1 SV=1	NA	NA	NA	NA	NA	NA	NA	NA	NA	NA	NA	NA	NA	NA	NA	NA	3.068	2.43733	1.65967	1.51173	1.30342	1.05263	1.50629	1.28423	NA	NA	NA	NA	NA	NA	NA	NA	NA	NA	0.868983	0.635824	0.287593	0.350941	0.811971	0.846041	2.07254	1.16054	0.514199	0.550494	NA	NA	NA
O15511	ARPC5	Actin-related protein 2/3 complex subunit 5 OS=Homo sapiens OX=9606 GN=ARPC5 PE=1 SV=3	NA	NA	NA	NA	NA	NA	NA	NA	NA	NA	NA	NA	NA	NA	NA	NA	NA	NA	NA	NA	NA	NA	NA	NA	NA	NA	NA	NA	NA	NA	NA	NA	NA	NA	0.601526	0.586133	0.85228	0.850805	0.926203	0.543707	0.743962	0.73785	0.729864	0.724019	0.667944	0.822792	1.16393
O43157	PLXNB1	Plexin-B1 OS=Homo sapiens OX=9606 GN=PLXNB1 PE=1 SV=3	NA	NA	NA	NA	NA	NA	NA	NA	0.619038	0.756703	0.698436	0.87843	0.983366	0.865377	0.879222	0.971106	0.817335	0.984389	0.915416	1.11775	0.927423	0.853699	0.800237	0.966003	0.841654	0.889644	0.776953	0.790589	0.824734	1.05015	1.06866	1.10542	1.22315	1.00765	1.15341	1.01924	1.09126	0.839208	0.846863	0.895832	1.25928	0.982412	0.665034	0.674879	0.840372	0.820002	0.904442
O43493	TGOLN2	Trans-Golgi network integral membrane protein 2 OS=Homo sapiens OX=9606 GN=TGOLN2 PE=1 SV=4	0.840838	0.777061	0.847744	1.61507	0.906074	1.12529	1.58623	1.44133	0.766894	0.876059	0.824162	0.938416	0.67633	0.805971	0.858387	0.873028	0.652568	0.795812	0.867779	0.723467	0.870913	1.01045	1.13524	1.37107	1.13438	1.23559	1.24281	1.39407	0.562178	0.75372	0.956476	0.992611	0.989177	1.0743	1.41147	1.10076	1.28218	0.987806	0.97124	0.928259	0.939848	0.982752	0.78328	0.942327	NA	NA	NA
O43505	B4GAT1	Beta-1,4-glucuronyltransferase 1 OS=Homo sapiens OX=9606 GN=B4GAT1 PE=1 SV=1	NA	NA	NA	NA	NA	NA	NA	NA	0.935688	1.12928	1.15669	1.20689	0.921273	1.17756	1.00083	1.06563	0.91567	0.914719	1.10519	1.07661	1.09901	1.03047	1.14584	1.08546	1.16465	1.19408	1.10696	1.20155	1.2201	1.31339	1.0009	0.992886	1.26374	1.07118	1.4025	1.01635	0.731941	0.664021	0.997162	1.20322	1.02179	0.879771	0.655242	1.02292	1.25536	0.965133	0.65916
O43548	TGM5	Protein-glutamine gamma-glutamyltransferase 5 OS=Homo sapiens OX=9606 GN=TGM5 PE=1 SV=4	NA	NA	NA	NA	NA	NA	NA	NA	NA	NA	NA	NA	NA	NA	NA	NA	NA	NA	NA	NA	NA	NA	NA	NA	NA	NA	NA	NA	NA	NA	NA	NA	NA	NA	NA	NA	NA	NA	NA	NA	NA	NA	NA	NA	NA	NA	NA
O43665	RGS10	Regulator of G-protein signaling 10 OS=Homo sapiens OX=9606 GN=RGS10 PE=1 SV=3	NA	NA	NA	NA	NA	NA	NA	NA	NA	NA	NA	NA	NA	NA	NA	NA	1.53709	0.601652	0.397245	0.59481	0.698533	1.41167	0.730117	0.897634	NA	NA	NA	NA	NA	NA	NA	NA	NA	NA	1.13966	4.43797	1.88727	5.77251	2.57666	2.22268	1.63728	4.57985	3.65431	5.98188	NA	NA	NA
O43707	ACTN4	Alpha-actinin-4 OS=Homo sapiens OX=9606 GN=ACTN4 PE=1 SV=2	NA	NA	NA	NA	NA	NA	NA	NA	1.06282	0.756861	1.03268	0.945402	1.04565	0.856663	0.968215	0.768225	NA	NA	NA	NA	NA	NA	NA	NA	1.37183	0.837929	0.926267	1.52626	0.785074	1.24453	0.936857	1.71345	0.725275	1.72644	0.782737	1.1837	0.819548	1.33145	0.928903	0.771426	0.917831	1.24695	0.974612	1.49786	0.951978	0.964063	0.875149
O43866	CD5L	CD5 antigen-like OS=Homo sapiens OX=9606 GN=CD5L PE=1 SV=1	0.869586	1.12998	1.14703	0.961994	1.15381	1.36879	1.20197	1.12771	0.695682	0.820685	0.815524	0.839557	1.07773	1.28797	1.22002	1.12381	1.33691	1.50953	1.12724	1.11721	1.07103	1.13556	1.34136	1.18781	0.926139	0.973599	0.959996	1.01953	0.981527	1.19119	1.51246	1.34742	1.3383	1.31896	0.421353	0.415725	0.60794	0.534922	0.391043	0.392129	0.553325	0.507472	0.496925	0.47339	0.479732	0.372574	0.490254
O60234	GMFG	Glia maturation factor gamma OS=Homo sapiens OX=9606 GN=GMFG PE=1 SV=1	NA	NA	NA	NA	NA	NA	NA	NA	1.12467	0.84792	1.01621	1.12889	1.0294	0.917131	0.886935	1.03807	0.956277	0.775823	0.895459	1.11884	0.669149	0.987464	0.975017	0.826794	NA	NA	NA	NA	NA	NA	NA	NA	NA	NA	0.896826	1.91866	0.84253	2.12476	1.22476	1.30089	1.05292	1.72142	1.3744	2.14355	1.19259	1.27006	1.12951
O60239	SH3BP5	SH3 domain-binding protein 5 OS=Homo sapiens OX=9606 GN=SH3BP5 PE=1 SV=2	NA	NA	NA	NA	NA	NA	NA	NA	0.844167	0.892238	0.819946	0.79924	1.0538	0.894529	0.895956	0.701493	NA	NA	NA	NA	NA	NA	NA	NA	NA	NA	NA	NA	NA	NA	NA	NA	NA	NA	NA	NA	NA	NA	NA	NA	NA	NA	NA	NA	1.48813	1.12638	1.26234
O60832	DKC1	H/ACA ribonucleoprotein complex subunit DKC1 OS=Homo sapiens OX=9606 GN=DKC1 PE=1 SV=3	1.03204	0.767001	1.04558	1.59604	0.988012	0.874482	1.20689	1.66798	0.686104	0.901126	0.652161	0.600235	0.891867	0.880137	0.697807	0.859697	NA	NA	NA	NA	NA	NA	NA	NA	NA	NA	NA	NA	NA	NA	NA	NA	NA	NA	NA	NA	NA	NA	NA	NA	NA	NA	NA	NA	NA	NA	NA
O75015	FCGR3B	Low affinity immunoglobulin gamma Fc region receptor III-B OS=Homo sapiens OX=9606 GN=FCGR3B PE=1 SV=2	NA	NA	NA	NA	NA	NA	NA	NA	NA	NA	NA	NA	NA	NA	NA	NA	1.3877	1.70704	0.958467	1.03929	0.916877	0.571728	1.05088	0.903189	0.72749	0.995712	1.49092	1.16248	1.36737	1.43724	0.991236	0.96413	1.05227	0.785509	NA	NA	NA	NA	NA	NA	NA	NA	NA	NA	2.0107	1.33164	1.58063
O75019	LILRA1	Leukocyte immunoglobulin-like receptor subfamily A member 1 OS=Homo sapiens OX=9606 GN=LILRA1 PE=2 SV=1	0.889089	0.768331	0.932968	0.729965	0.975085	0.944289	0.782792	0.532517	NA	NA	NA	NA	NA	NA	NA	NA	1.1242	1.12584	0.855951	1.07155	1.32979	1.21108	1.28895	1.47693	1.74702	1.19243	1.63546	1.30776	1.17373	1.2578	1.49226	1.64718	1.31576	1.19964	0.972588	0.755446	1.14599	0.90344	0.791412	0.798188	0.891249	0.844225	0.867418	0.781978	NA	NA	NA
O75083	WDR1	WD repeat-containing protein 1 OS=Homo sapiens OX=9606 GN=WDR1 PE=1 SV=4	1.04427	0.492604	0.783606	0.971038	0.778085	0.617495	0.638518	0.560738	1.61799	0.754295	1.02441	0.973802	1.02052	0.905069	0.766735	0.598781	1.39185	0.707156	0.70794	0.822336	1.00132	1.27182	0.93187	1.07393	1.07923	0.900688	0.852576	0.558721	1.41382	0.755184	0.724521	0.701055	0.831219	0.822165	0.886197	1.79577	0.974207	2.14191	1.02193	1.22935	1.15021	1.88845	1.44193	1.96932	1.29576	1.72118	1.2379
O75144	ICOSLG	ICOS ligand OS=Homo sapiens OX=9606 GN=ICOSLG PE=1 SV=2	NA	NA	NA	NA	NA	NA	NA	NA	NA	NA	NA	NA	NA	NA	NA	NA	0.640291	0.769184	0.672124	0.655878	0.758857	1.05651	0.746182	0.990824	1.13792	1.33459	0.810565	1.0811	0.783769	1.12179	0.924791	1.2619	1.211	1.33997	1.19119	1.29567	1.05819	1.32317	1.19201	1.6306	1.03154	1.29361	0.801625	1.03814	NA	NA	NA
O75173	ADAMTS4	A disintegrin and metalloproteinase with thrombospondin motifs 4 OS=Homo sapiens OX=9606 GN=ADAMTS4 PE=1 SV=3	0.544763	0.870309	0.5484	0.390231	1.01565	0.634855	4.86048	1.23559	NA	NA	NA	NA	NA	NA	NA	NA	NA	NA	NA	NA	NA	NA	NA	NA	0.764506	0.939067	0.650085	0.825248	0.826794	0.806306	3.56648	1.22264	2.65977	0.723969	0.779273	0.684964	0.621575	0.390718	0.696454	0.380429	6.22209	1.03994	5.2784	0.189596	0.778787	0.657608	0.612423
O75347	TBCA	Tubulin-specific chaperone A OS=Homo sapiens OX=9606 GN=TBCA PE=1 SV=3	0.575704	0.508	0.5404	1.36311	0.568054	0.377095	0.585199	0.909787	1.42979	1.01031	1.0802	0.97252	0.932968	0.674224	0.801292	0.843933	1.07118	0.846217	0.919295	0.924663	0.986301	1.01967	0.954224	1.08005	1.1883	0.888596	0.848979	0.890693	0.992404	1.02456	0.754608	0.9973	0.867839	1.12521	0.989725	1.41235	1.27059	2.01517	1.67876	1.17267	1.21243	1.72417	1.27438	1.54735	0.980371	1.2585	1.1395
O75382	TRIM3	Tripartite motif-containing protein 3 OS=Homo sapiens OX=9606 GN=TRIM3 PE=1 SV=2	1.0968	1.92786	1.49133	0.851867	1.26804	1.15429	0.953827	1.13288	0.860114	1.31012	0.87206	0.610008	1.35548	1.20064	0.70799	0.755446	0.826336	0.900938	1.1128	1.21209	0.845104	0.389366	0.957271	0.712766	NA	NA	NA	NA	NA	NA	NA	NA	NA	NA	1.96265	1.2518	1.27544	0.855773	0.862861	0.859935	0.616042	0.572084	0.936337	0.762231	1.09081	0.901188	0.764612
O75636	FCN3	Ficolin-3 OS=Homo sapiens OX=9606 GN=FCN3 PE=1 SV=2	1.07564	0.675721	1.02094	1.07729	1.12638	1.20916	1.08658	0.637369	0.897323	0.813718	0.63446	1.00891	0.677409	1.25972	0.685296	0.87618	0.915289	0.826336	0.602988	0.943111	1.08854	1.38934	1.21647	1.15461	0.796033	1.46135	1.22969	0.710743	1.23636	0.883131	1.02207	0.656515	1.16829	0.898257	0.925497	0.955548	1.62721	1.40669	0.898568	1.12795	1.26962	1.23029	1.51519	1.37974	1.54104	1.44914	2.02778
O75874	IDH1	Isocitrate dehydrogenase [NADP] cytoplasmic OS=Homo sapiens OX=9606 GN=IDH1 PE=1 SV=2	0.939588	0.352428	0.664711	1.50692	1.44734	1.13077	0.735298	0.968618	1.32694	0.763183	0.517381	1.63989	0.424078	0.945927	0.505927	1.32198	1.84025	0.717624	1.10688	1.07073	0.944485	0.990686	0.919996	0.946254	NA	NA	NA	NA	NA	NA	NA	NA	NA	NA	0.47622	1.65588	0.984116	1.65095	0.487543	1.2531	0.664942	1.98151	1.16538	1.5671	NA	NA	NA
O75882	ATRN	Attractin OS=Homo sapiens OX=9606 GN=ATRN PE=1 SV=2	0.894405	0.948027	1.0213	1.15109	0.981527	1.03197	0.918085	0.963195	1.07751	1.12218	1.08998	0.968685	1.17097	1.22281	1.09847	1.13879	1.13155	1.29648	0.96835	0.952374	1.14854	1.17462	1.14942	1.3064	1.36207	1.37173	1.12443	1.21386	1.01579	1.23456	1.27015	1.38262	1.24531	1.39774	0.856782	0.740412	0.625248	0.645371	0.651303	0.693371	0.669335	0.618609	0.601693	0.63653	0.704709	0.76945	0.74898
O76074	PDE5A	cGMP-specific 3,5-cyclic phosphodiesterase OS=Homo sapiens OX=9606 GN=PDE5A PE=1 SV=2	NA	NA	NA	NA	NA	NA	NA	NA	NA	NA	NA	NA	NA	NA	NA	NA	NA	NA	NA	NA	NA	NA	NA	NA	1.58755	1.27775	1.20974	1.16191	1.47683	1.28521	1.34285	1.7138	1.43008	1.76602	NA	NA	NA	NA	NA	NA	NA	NA	NA	NA	NA	NA	NA
O95445	APOM	Apolipoprotein M OS=Homo sapiens OX=9606 GN=APOM PE=1 SV=2	1.09551	1.07721	1.17129	1.275	1.36784	1.3345	1.41294	1.26304	0.855476	0.906262	0.83822	0.721514	1.10957	1.14084	1.04023	0.766682	1.43465	1.75759	1.22782	1.18789	1.42385	1.74957	1.64741	1.83096	1.60871	1.5645	1.26295	1.219	1.14314	1.43614	1.22748	1.25614	1.44724	1.68494	0.526097	0.498719	0.411311	0.362236	0.508282	0.444421	0.527411	0.469306	0.364629	0.326171	0.380957	0.366809	0.301222
O95479	H6PD	GDH/6PGL endoplasmic bifunctional protein OS=Homo sapiens OX=9606 GN=H6PD PE=1 SV=2	0.507437	0.59849	0.550914	0.469859	0.831795	0.959331	0.949671	0.967746	1.31103	1.70539	2.57077	2.38006	1.29235	1.31531	1.28423	0.801236	1.01776	0.894095	0.943831	1.15677	0.936402	1.00389	1.12155	0.919104	0.926717	0.850982	0.988697	1.19342	0.684252	0.931159	0.959796	0.954489	0.680987	0.843874	NA	NA	NA	NA	NA	NA	NA	NA	NA	NA	NA	NA	NA
O95810	CAVIN2	Caveolae-associated protein 2 OS=Homo sapiens OX=9606 GN=CAVIN2 PE=1 SV=3	1.08651	0.807705	0.858446	0.722115	0.50111	0.395706	0.463455	0.449627	1.59626	0.704856	1.2972	0.923254	1.06253	0.611151	0.836304	0.559302	1.04877	0.746389	0.699599	0.639537	0.913958	1.70681	0.760911	1.00675	3.43617	1.42375	1.37564	1.82741	1.46409	1.5323	0.716133	3.02241	0.857198	3.06566	0.654108	1.83236	0.798907	1.79714	0.886812	0.754033	0.996195	1.54531	1.39185	2.08681	1.35962	2.03835	3.17906
O95866	MPIG6B	Megakaryocyte and platelet inhibitory receptor G6b OS=Homo sapiens OX=9606 GN=MPIG6B PE=1 SV=1	NA	NA	NA	NA	NA	NA	NA	NA	NA	NA	NA	NA	NA	NA	NA	NA	NA	NA	NA	NA	NA	NA	NA	NA	1.34127	1.19872	0.936597	1.10129	0.922423	1.17691	0.949869	1.10428	1.2126	1.2836	NA	NA	NA	NA	NA	NA	NA	NA	NA	NA	1.21563	1.14045	1.75054
O95998	IL18BP	Interleukin-18-binding protein OS=Homo sapiens OX=9606 GN=IL18BP PE=1 SV=2	1.32657	1.82855	1.64444	2.09725	1.46135	1.51477	1.3686	2.08811	1.1448	0.8743	1.02491	1.62597	1.31258	1.58173	1.21672	0.876727	1.62755	1.6529	1.02562	0.950066	1.64182	1.58282	2.2686	1.64832	1.07729	0.852635	1.46724	1.71987	0.70427	0.837232	1.1721	0.946976	1.24833	1.02186	NA	NA	NA	NA	NA	NA	NA	NA	NA	NA	NA	NA	NA
P00338	LDHA	L-lactate dehydrogenase A chain OS=Homo sapiens OX=9606 GN=LDHA PE=1 SV=2	1.02527	0.930837	1.04623	1.17642	1.39503	1.51782	0.989862	1.12959	1.10949	0.958068	1.0838	1.11806	1.18353	1.10382	1.03958	1.52658	1.37716	1.16692	1.14687	0.948553	0.969559	0.987806	0.923766	0.803851	1.33182	0.867118	1.13871	1.01417	1.13218	1.01988	0.994608	1.12047	0.856663	1.23097	0.793334	1.24315	1.00703	1.69349	1.25214	0.819321	0.829205	1.31403	1.06977	1.49765	0.986164	1.14409	1.06555
P00352	ALDH1A1	Retinal dehydrogenase 1 OS=Homo sapiens OX=9606 GN=ALDH1A1 PE=1 SV=2	1.7692	1.66106	1.44183	3.64571	1.37907	1.73532	1.30107	3.44332	0.817675	1.05008	0.772443	0.904944	0.569315	0.569197	0.559419	1.53773	2.20091	0.702661	1.32024	0.843465	0.747166	0.60374	0.599736	0.567424	NA	NA	NA	NA	NA	NA	NA	NA	NA	NA	NA	NA	NA	NA	NA	NA	NA	NA	NA	NA	NA	NA	NA
P00367	GLUD1	Glutamate dehydrogenase 1, mitochondrial OS=Homo sapiens OX=9606 GN=GLUD1 PE=1 SV=2	1.52203	0.21479	0.508951	0.275457	0.357298	0.268557	0.31506	0.250121	NA	NA	NA	NA	NA	NA	NA	NA	1.64947	0.973464	3.54553	2.0832	0.996264	1.0793	1.1303	1.13966	NA	NA	NA	NA	NA	NA	NA	NA	NA	NA	NA	NA	NA	NA	NA	NA	NA	NA	NA	NA	NA	NA	NA
P00390	GSR	Glutathione reductase, mitochondrial OS=Homo sapiens OX=9606 GN=GSR PE=1 SV=2	0.988354	1.08892	1.15589	1.07983	1.34453	1.59804	1.24418	1.32492	1.02179	1.20991	1.12443	1.19011	1.17349	1.43256	1.07073	1.11095	0.988834	1.16902	1.18838	0.630208	0.632264	0.852517	0.984457	0.902939	NA	NA	NA	NA	NA	NA	NA	NA	NA	NA	NA	NA	NA	NA	NA	NA	NA	NA	NA	NA	NA	NA	NA
P00450	CP	Ceruloplasmin OS=Homo sapiens OX=9606 GN=CP PE=1 SV=1	0.801792	0.945533	1.11342	0.938481	0.982344	1.1414	1.04413	1.08192	0.965936	0.868321	0.988354	1.08771	1.14163	1.26146	1.25954	0.909976	0.917385	1.09802	0.885399	0.815242	0.998684	0.921336	1.07743	0.938937	1.19947	1.02655	0.960129	1.18838	0.931999	0.946976	1.23508	1.29918	1.03405	1.01635	1.42543	0.949869	1.31076	0.865497	1.16127	0.941152	1.19069	0.892238	1.17406	0.884234	1.30994	0.93368	1.29918
P00451	F8	Coagulation factor VIII OS=Homo sapiens OX=9606 GN=F8 PE=1 SV=1	1.05709	0.852694	1.89172	1.43863	1.47509	0.418645	0.95767	0.499134	1.77485	1.51498	1.10995	1.86038	1.18435	1.68098	0.865797	1.36632	1.06622	1.24031	0.922295	1.24781	1.44633	1.31951	1.26059	1.1805	NA	NA	NA	NA	NA	NA	NA	NA	NA	NA	NA	NA	NA	NA	NA	NA	NA	NA	NA	NA	1.14053	0.553709	1.16264
P00480	OTC	Ornithine carbamoyltransferase, mitochondrial OS=Homo sapiens OX=9606 GN=OTC PE=1 SV=3	1.51257	1.71131	3.05379	2.58847	0.978063	0.90175	1.02933	0.800237	NA	NA	NA	NA	NA	NA	NA	NA	2.47426	0.947961	5.584	1.89619	0.890508	1.20455	0.782792	0.780137	NA	NA	NA	NA	NA	NA	NA	NA	NA	NA	NA	NA	NA	NA	NA	NA	NA	NA	NA	NA	NA	NA	NA
P00488	F13A1	Coagulation factor XIII A chain OS=Homo sapiens OX=9606 GN=F13A1 PE=1 SV=4	0.750852	0.633229	0.587842	0.814282	0.745459	0.603615	0.688009	1.0041	1.25928	1.03018	1.16223	0.697565	0.929032	0.728803	0.780678	0.719666	1.2018	0.952638	0.694333	0.693804	0.930643	0.946779	0.880991	1.0115	1.4797	1.18296	0.743704	1.04906	1.12187	1.14806	0.977589	1.23055	1.22137	1.57211	1.22044	1.40153	1.14449	1.46805	1.39194	1.28049	1.27068	1.34873	0.971577	1.09429	1.05205	1.23868	0.932193
P00491	PNP	Purine nucleoside phosphorylase OS=Homo sapiens OX=9606 GN=PNP PE=1 SV=2	0.786817	0.749812	1.12701	2.23643	0.622523	0.55938	0.596833	0.546048	1.10565	0.787144	1.12225	0.689776	0.98473	0.58593	0.692075	0.997508	NA	NA	NA	NA	NA	NA	NA	NA	NA	NA	NA	NA	NA	NA	NA	NA	NA	NA	1.02762	1.66555	1.22086	1.65187	1.40991	0.876363	0.908778	1.67423	1.44263	1.69408	1.03951	1.79714	1.39358
P00558	PGK1	Phosphoglycerate kinase 1 OS=Homo sapiens OX=9606 GN=PGK1 PE=1 SV=3	1.07177	0.655515	1.10489	1.90026	0.929032	0.856723	0.745149	1.12763	1.24358	1.07497	0.900626	1.23508	0.811858	1.13453	1.05804	1.02087	1.42632	0.661448	0.682074	0.913198	1.17634	1.21495	0.917703	0.890137	1.11829	1.02626	1.05074	0.72427	1.47427	0.869405	0.76732	1.18501	0.897572	1.14211	0.921528	1.5619	1.25006	2.09391	1.08568	1.26103	1.1595	1.8065	1.54714	2.11052	1.06282	1.40269	1.25954
P00568	AK1	Adenylate kinase isoenzyme 1 OS=Homo sapiens OX=9606 GN=AK1 PE=1 SV=3	1.01558	0.763712	1.10183	2.76715	0.908274	0.820855	0.805524	0.943569	1.01354	1.19028	0.726281	1.0304	0.658429	0.847332	0.689824	1.46683	0.81592	0.613357	0.677973	0.970702	0.788564	1.1016	0.724923	0.616298	NA	NA	NA	NA	NA	NA	NA	NA	NA	NA	0.809386	2.07873	0.958799	2.04245	0.798022	1.42287	0.761175	1.86503	1.41108	2.12476	1.45226	1.83821	1.34948
P00734	F2	Prothrombin OS=Homo sapiens OX=9606 GN=F2 PE=1 SV=2	0.929483	0.844401	1.01396	1.01347	1.05812	1.00069	0.918213	0.785455	0.933486	0.960395	0.9214	0.855951	0.988971	1.22188	1.08237	1.079	1.02349	1.08425	0.965802	1.00668	1.06157	1.10819	1.05988	1.23799	1.23696	1.17674	1.01988	1.10665	0.96674	1.19267	1.03175	1.11126	1.17316	1.21361	1.18559	0.91168	1.14544	0.874967	1.02819	1.0203	1.12826	0.951318	0.860949	0.783009	0.759331	0.718271	0.840605
P00736	C1R	Complement C1r subcomponent OS=Homo sapiens OX=9606 GN=C1R PE=1 SV=2	0.91567	0.715339	1.20189	0.98432	1.13061	1.23106	1.37383	0.93517	0.908904	0.830067	0.838278	1.14687	0.813943	1.23988	0.868441	0.951318	0.942327	1.11636	0.922615	1.12724	1.18255	1.34509	1.50566	1.38185	1.00814	1.46307	1.20673	0.819264	1.00765	0.715935	1.21833	0.912186	1.30731	0.877214	1.12179	0.954026	1.1169	0.780245	0.73545	0.899191	1.00389	0.935753	1.0694	0.893785	0.751998	0.643093	0.702563
P00738	HP	Haptoglobin OS=Homo sapiens OX=9606 GN=HP PE=1 SV=1	1.13367	1.23405	1.29675	0.522716	1.46846	0.719716	0.716183	0.291729	1.11775	0.953497	1.31339	1.59516	1.11211	1.25579	1.30776	0.561244	1.81491	1.98	1.51404	1.36122	1.50723	0.985549	1.75418	1.15781	0.976505	0.727642	0.927552	1.1292	0.998338	0.792619	1.19673	0.934522	0.752154	0.593944	0.643628	0.438546	1.05044	0.498892	1.3333	0.644119	1.2147	0.429819	1.05878	0.476748	0.469403	0.514627	1.26716
P00739	HPR	Haptoglobin-related protein OS=Homo sapiens OX=9606 GN=HPR PE=2 SV=2	0.758279	0.739386	0.711482	0.727389	1.13273	1.02997	0.9973	0.968685	0.657699	0.661127	0.618095	0.62681	0.932322	1.04478	0.881602	0.76202	0.877943	1.00479	0.700812	0.715389	0.973464	0.950066	0.964999	0.98678	1.92252	1.68319	1.09764	1.15205	1.07423	1.1425	1.01579	1.05753	1.38819	1.41785	1.32024	1.16894	1.44383	1.26786	1.05117	1.06069	2.00903	1.2201	1.57614	1.0811	1.06814	1.02826	1.51351
P00740	F9	Coagulation factor IX OS=Homo sapiens OX=9606 GN=F9 PE=1 SV=2	1.15621	0.943177	1.10842	0.960928	1.29648	1.37249	1.20039	0.742313	0.96788	0.973397	1.04239	1.07007	1.0184	1.21411	1.07863	1.17789	1.34733	1.32501	1.22349	1.25841	1.27447	1.1456	1.4575	1.41853	0.999169	1.06829	1.26015	1.08704	0.966874	1.00028	1.08073	1.04979	0.913578	0.902188	0.951714	0.668871	1.0141	0.666465	0.714992	0.694863	0.7452	0.596461	0.710251	0.64555	0.907708	0.766948	0.872423
P00742	F10	Coagulation factor X OS=Homo sapiens OX=9606 GN=F10 PE=1 SV=2	0.913135	0.853522	1.04369	0.912755	1.14703	1.15149	1.0697	0.917004	1.02576	1.10773	1.02883	0.962795	1.14814	1.26497	1.21816	1.16272	1.19135	1.2441	1.08147	1.10865	1.25893	1.19185	1.20673	1.27491	1.46064	1.29891	1.39716	1.27509	1.05234	1.26321	1.24255	1.17911	1.42336	1.38482	0.90369	0.685059	0.744219	0.588739	0.711729	0.71653	0.765301	0.60282	0.635957	0.592013	0.654607	0.615914	0.72422
P00746	CFD	Complement factor D OS=Homo sapiens OX=9606 GN=CFD PE=1 SV=5	0.576703	1.18756	0.712124	0.639183	0.714596	0.67755	0.699163	0.753302	0.847861	0.959264	0.849332	0.874239	0.941087	1.03097	0.974274	1.0127	0.991373	1.15053	1.0367	1.09642	1.24885	1.18756	1.43555	1.51488	0.966606	1.15189	1.00961	1.19715	1.07118	1.01748	1.29765	1.29298	1.27315	1.12748	0.913515	0.995919	1.03742	0.984866	1.18009	0.992267	1.0319	1.09794	1.21748	0.744116	0.550914	0.573673	0.506312
P00747	PLG	Plasminogen OS=Homo sapiens OX=9606 GN=PLG PE=1 SV=2	1.008	0.761756	0.995298	1.07482	1.08365	0.902626	0.9652	0.777977	1.03054	1.02754	0.960395	1.01192	0.806083	1.28708	0.998753	1.10665	1.22688	1.03354	0.950725	1.15317	1.41225	1.40075	1.23893	1.58667	1.31595	1.46287	1.07111	1.10842	1.15341	1.27766	1.35275	1.12889	1.33016	1.17316	0.928452	0.860651	1.04102	0.920251	0.816656	0.97522	0.949869	0.878491	1.00014	0.821652	0.829952	0.733109	0.851277
P00748	F12	Coagulation factor XII OS=Homo sapiens OX=9606 GN=F12 PE=1 SV=3	0.75231	0.821595	0.873028	1.03319	0.986028	0.79935	0.901188	0.79207	0.765408	0.891125	0.845045	0.862383	1.50035	1.57058	1.35266	1.64695	0.933874	1.0946	0.847391	0.924023	1.33923	1.30486	1.38415	1.64422	1.71416	1.57058	1.03483	0.994194	1.25249	1.44603	1.10068	1.15589	1.27385	1.20673	0.885276	0.711581	1.06017	0.969155	0.596999	0.607224	0.539352	0.487982	0.682641	0.71658	0.338282	0.453162	0.633668
P00751	CFB	Complement factor B OS=Homo sapiens OX=9606 GN=CFB PE=1 SV=2	0.912186	0.936597	1.26427	1.02854	1.01192	1.16119	1.01171	0.843173	0.919933	0.782574	0.959264	1.13014	1.07818	1.51677	1.42612	0.835667	0.93517	1.0094	0.795757	0.771801	1.19922	1.0025	1.25762	1.09962	1.23328	1.11265	1.13587	1.30812	0.971577	0.877639	1.35576	1.1603	1.00305	0.926139	1.30604	0.783226	1.70303	0.802626	0.909787	0.726231	1.11011	0.786544	1.12529	0.740823	1.45025	0.915289	1.53421
P00915	CA1	Carbonic anhydrase 1 OS=Homo sapiens OX=9606 GN=CA1 PE=1 SV=2	0.984593	0.947698	1.58711	3.1974	1.14544	1.11985	0.910544	1.17593	0.662917	1.38934	0.849332	1.01565	0.821254	0.914212	0.844928	2.10833	0.722265	0.853936	0.618952	1.01094	1.08267	0.899503	0.795702	0.630951	0.980779	0.940305	0.923446	0.835435	0.905948	0.834683	0.955614	0.989451	0.84892	0.742159	1.43535	0.829205	1.29729	0.708824	0.987532	1.13233	1.25327	1.13571	1.19972	0.869345	1.06098	0.971106	1.22273
P00918	CA2	Carbonic anhydrase 2 OS=Homo sapiens OX=9606 GN=CA2 PE=1 SV=2	1.04102	0.950396	1.58063	3.88685	1.20765	1.0826	0.872605	0.972048	0.804799	1.36831	0.795867	0.985276	0.680987	0.974207	0.709463	2.47564	0.81079	0.856782	0.622998	1.09589	1.05023	0.952308	0.763818	0.706176	0.863699	1.12233	0.924599	0.620929	0.972588	0.626984	0.754556	0.747839	0.859756	0.874906	1.07796	1.06253	0.895832	1.04203	0.858506	1.10068	0.761386	1.35407	0.833295	1.06666	0.994057	1.05168	0.935105
P01008	SERPINC1	Antithrombin-III OS=Homo sapiens OX=9606 GN=SERPINC1 PE=1 SV=1	0.929612	0.896205	0.85299	0.898506	1.14441	1.0172	0.888904	0.707058	0.971846	1.06718	1.01052	0.971577	1.18978	1.32134	1.16328	1.39552	1.21075	1.31567	1.05161	1.13343	1.15053	1.15565	1.13147	1.33589	1.44603	1.34332	1.18912	1.15477	1.06851	1.29361	1.05249	1.21033	1.27863	1.36528	1.23405	1.00598	1.17292	0.997992	1.01642	1.01875	1.08666	1.00382	0.936207	0.908337	0.789603	0.828458	0.913388
P01009	SERPINA1	Alpha-1-antitrypsin OS=Homo sapiens OX=9606 GN=SERPINA1 PE=1 SV=3	0.927231	1.2598	1.511	1.45377	1.1321	1.5322	1.4963	1.25963	0.891681	0.786762	0.995229	1.2585	1.50025	1.75991	1.88492	1.33459	0.954687	1.15413	0.920826	0.759173	0.93103	0.807369	1.10673	0.731231	1.12646	0.914719	1.31978	1.21352	0.869947	0.82023	1.41686	1.16538	0.944027	0.90733	1.35867	0.825649	1.59881	0.827654	1.05563	0.868562	1.26971	0.979149	0.908211	0.707499	1.07826	0.7776	1.18888
P01011	SERPINA3	Alpha-1-antichymotrypsin OS=Homo sapiens OX=9606 GN=SERPINA3 PE=1 SV=2	1.20924	1.15829	1.47121	1.29855	1.36037	1.37421	1.29945	0.865257	1.09338	0.917576	0.95767	1.13406	1.40425	1.35426	1.35962	1.44143	1.31805	1.31421	1.29909	1.12428	1.08877	0.799129	1.2084	0.779381	1.00208	0.701347	1.43296	0.975017	0.961861	0.763447	1.14195	0.833989	0.76929	0.66508	1.37183	0.709709	1.42208	0.603698	0.978199	0.639537	1.25884	0.687628	0.977318	0.554592	1.15405	0.558876	1.05621
P01019	AGT	Angiotensinogen OS=Homo sapiens OX=9606 GN=AGT PE=1 SV=1	0.94875	0.936078	1.12529	1.78176	1.17577	1.32519	1.36765	1.22112	1.00744	1.01417	0.984116	0.976776	1.1632	1.1721	1.03872	1.75078	0.918149	0.958533	0.991579	0.963062	0.935883	0.839731	0.986575	1.00014	0.880991	0.874906	1.23911	1.05643	0.955548	0.982003	1.01059	0.918531	0.979964	1.01967	1.2201	0.924023	1.34667	0.94737	0.978199	0.916242	1.01227	0.816656	0.898257	0.829435	0.869525	1.00459	0.904756
P01023	A2M	Alpha-2-macroglobulin OS=Homo sapiens OX=9606 GN=A2M PE=1 SV=3	0.547868	0.649544	0.664113	0.638607	0.725778	0.784693	0.759173	0.773407	0.937636	0.977928	1.01087	1.00014	1.09741	1.22884	1.19044	1.07103	0.817675	1.00884	0.776307	0.777277	0.894405	0.947501	1.20941	1.38636	0.849626	0.924791	0.937116	1.08734	0.896267	1.05249	1.23997	1.45932	1.10297	1.25666	1.43853	1.18698	0.848567	0.826909	0.85607	0.898257	1.09657	1.0601	0.725124	0.721564	0.933939	0.970231	0.962661
P01024	C3	Complement C3 OS=Homo sapiens OX=9606 GN=C3 PE=1 SV=2	0.889706	0.987532	1.0949	0.91548	1.03922	1.01607	0.842705	0.738618	1.01981	0.937181	1.02562	1.07386	0.961594	1.13903	1.00319	0.772229	0.58719	0.8743	0.740412	0.799683	1.03118	1.05409	1.08282	1.06866	1.31677	1.11605	1.10895	1.29594	0.940174	1.06349	1.01066	1.14361	1.00842	0.999584	1.08847	0.800626	1.10129	0.837929	1.10611	0.979624	1.04536	0.822222	1.08764	0.847744	1.02591	0.949211	1.1717
P01031	C5	Complement C5 OS=Homo sapiens OX=9606 GN=C5 PE=1 SV=4	0.888904	0.857733	1.0094	0.776523	1.01017	0.960129	0.793719	0.608572	1.00431	1.05775	1.09187	1.10581	1.11443	1.36169	1.1591	1.22927	0.94954	1.05402	0.845807	0.950725	1.07535	0.977047	1.15173	1.2179	1.21209	1.11566	1.2179	1.06179	0.956078	0.997439	1.11582	1.14076	0.959996	0.910354	1.32244	0.958068	1.37088	1.05387	1.1429	0.992611	1.13304	0.893475	1.13391	0.808489	1.14298	0.926652	1.19906
P01033	TIMP1	Metalloproteinase inhibitor 1 OS=Homo sapiens OX=9606 GN=TIMP1 PE=1 SV=1	1.06098	1.32574	1.34649	1.25623	1.44013	1.44393	1.92305	2.43581	1.20239	1.08726	0.787526	1.3017	0.930192	1.34742	0.979217	0.952836	1.16837	1.21866	1.10038	1.12412	1.13508	1.07453	1.43694	1.11443	1.03562	0.849096	1.11822	1.05841	0.888719	0.898817	1.14727	1.07736	0.976776	0.88148	0.937701	1.06253	0.84043	1.07237	0.869104	0.801403	0.846569	0.938611	0.909156	1.07177	0.738004	0.659205	0.848096
P01034	CST3	Cystatin-C OS=Homo sapiens OX=9606 GN=CST3 PE=1 SV=1	0.977928	0.986506	1.54521	1.41735	1.21816	0.977047	2.00708	1.60125	0.878613	0.973734	0.924984	1.1145	1.11381	1.13839	1.17772	1.32492	0.859935	0.973464	1.20305	1.26927	1.02555	1.0519	1.16465	1.22179	0.966338	1.06157	1.54928	1.41245	1.08035	1.0674	1.06599	1.01185	1.13438	1.07007	1.18624	0.972722	1.03541	0.941544	0.883499	0.852871	0.930385	0.87843	0.929032	0.802348	0.788619	0.783389	0.858327
P01042	KNG1	Kininogen-1 OS=Homo sapiens OX=9606 GN=KNG1 PE=1 SV=2	0.934651	0.977928	1.05665	0.950066	0.990686	1.07549	0.96607	0.799517	0.825706	0.857495	0.964866	1.0237	1.13147	1.34332	1.27262	1.14949	1.093	1.20214	0.902063	0.889336	1.13666	1.13406	1.04088	1.20014	1.43893	1.32961	1.193	1.29657	0.994815	1.21201	1.16951	1.2972	1.2179	1.40639	1.25841	0.959397	1.18838	0.872907	0.965936	0.932839	0.999376	0.869465	0.934846	0.91567	0.786326	0.793829	0.86328
P01344	IGF2	Insulin-like growth factor II OS=Homo sapiens OX=9606 GN=IGF2 PE=1 SV=1	0.631126	0.803684	1.53879	1.04536	0.848626	0.798686	1.79415	1.32372	0.763024	0.808937	0.812365	1.16135	0.761703	0.836073	0.886873	0.710891	0.769397	0.898257	1.11458	1.10573	1.06792	1.12803	1.22553	1.69949	0.799794	0.866157	1.53464	1.50702	0.687723	0.828687	0.83915	0.834741	0.966539	0.958666	1.26146	1.10512	1.61631	1.28378	0.714695	0.851749	1.06164	1.0887	0.689872	0.751008	NA	NA	NA
P01591	JCHAIN	Immunoglobulin J chain OS=Homo sapiens OX=9606 GN=JCHAIN PE=1 SV=4	0.992542	1.55229	1.61698	1.04986	1.10834	1.33951	1.29235	1.17056	0.699114	0.806977	0.846569	0.929676	1.09688	1.25301	1.29119	1.07356	1.14997	1.26602	0.952902	0.905006	0.910607	0.988217	1.40873	0.986506	1.00968	0.874906	1.082	1.02023	1.01277	1.0805	1.63626	1.23072	1.34322	1.23251	0.874482	0.735298	1.19939	1.04362	0.645773	0.641757	1.0887	0.892114	0.867298	0.914465	0.443222	0.349993	0.505121
P01594	IGKV1-33	Immunoglobulin kappa variable 1-33 OS=Homo sapiens OX=9606 GN=IGKV1-33 PE=1 SV=2	0.866397	1.0799	1.04986	0.917195	1.17072	1.06415	0.975896	1.09399	1.02605	1.22901	1.16894	1.18682	1.29361	1.28449	1.25614	1.08328	0.885399	1.11675	1.07587	1.01143	0.844869	0.755027	1.04131	0.92974	1.08546	1.0817	0.900002	1.0442	1.04579	1.18279	0.988149	1.00647	1.01988	0.909787	1.49682	1.23962	0.87049	0.725979	1.00605	0.844108	1.00403	1.08088	1.02669	0.772282	0.890014	0.767586	0.754608
P01599	IGKV1-17	Immunoglobulin kappa variable 1-17 OS=Homo sapiens OX=9606 GN=IGKV1-17 PE=1 SV=2	1.09111	1.09467	0.865797	0.794545	1.08968	1.10965	0.873755	0.967545	1.28343	1.499	1.22205	1.08704	1.54585	1.57222	1.50828	1.0549	0.901063	1.02406	1.21909	1.00292	0.823934	0.53444	0.928774	0.749968	0.9405	1.01924	1.09847	1.33127	0.819605	1.09263	0.634416	0.516557	0.811858	0.694766	0.545481	0.494863	0.570382	0.51274	0.464355	0.497752	0.452911	0.41443	0.841654	0.830643	1.75018	1.02009	0.994608
P01601	IGKV1D-16	Immunoglobulin kappa variable 1D-16 OS=Homo sapiens OX=9606 GN=IGKV1D-16 PE=3 SV=2	1.0064	1.19872	1.04696	1.06925	1.13328	1.0213	1.11242	1.2422	0.996471	0.915416	1.03097	1.03699	1.25745	1.39571	1.3599	1.10305	NA	NA	NA	NA	NA	NA	NA	NA	NA	NA	NA	NA	NA	NA	NA	NA	NA	NA	0.969895	0.841888	1.46044	1.13406	1.0141	0.811521	0.916432	0.953893	1.20322	0.458788	NA	NA	NA
P01615	IGKV2D-28	Immunoglobulin kappa variable 2D-28 OS=Homo sapiens OX=9606 GN=IGKV2D-28 PE=1 SV=2	0.986438	1.10091	0.787908	0.604913	1.03247	0.974882	0.818356	1.11466	1.09338	1.39117	1.04739	0.851749	1.44884	1.22646	1.12272	0.955747	1.07229	1.16288	1.26514	1.18814	0.977318	1.40027	0.746079	0.662733	0.701444	0.752676	0.772764	0.973667	1.15253	1.47172	1.0314	0.912439	1.04964	0.958799	1.24496	0.952044	0.901938	0.786217	0.750123	0.739745	1.27297	1.04841	0.908652	0.809891	1.64262	0.738106	1.14433
P01619	IGKV3-20	Immunoglobulin kappa variable 3-20 OS=Homo sapiens OX=9606 GN=IGKV3-20 PE=1 SV=2	1.0362	1.27961	1.11288	0.870008	1	1.11705	1.00933	1.18001	0.975153	1.28521	1.03541	0.945009	1.44714	1.34434	1.35247	1.21167	0.853818	1.02441	1.21419	1.18624	0.990892	0.856485	0.974072	0.780245	0.781653	0.811465	0.921336	1.17349	1.10405	1.40981	1.16603	1.04124	0.918531	0.82188	0.641624	0.546162	0.549427	0.495652	0.61255	0.58927	0.665449	0.569118	0.60011	0.556634	0.71837	0.461435	0.562646
P01624	IGKV3-15	Immunoglobulin kappa variable 3-15 OS=Homo sapiens OX=9606 GN=IGKV3-15 PE=1 SV=2	0.815751	0.999099	0.811802	0.779921	0.964197	0.996195	0.838626	0.976438	1.00424	1.25815	1.01347	0.908023	1.24902	1.16135	1.01988	0.923446	0.908526	1.12678	1.31631	1.17634	0.95429	0.675628	0.846041	0.654017	0.864717	0.810116	1.18353	1.43137	0.987327	1.31303	0.880198	0.817902	0.902125	0.927423	0.992955	0.844635	0.835204	0.785455	0.917068	0.914909	1.13508	1.01508	0.857079	0.76977	1.34527	0.789822	1.14029
P01699	IGLV1-44	Immunoglobulin lambda variable 1-44 OS=Homo sapiens OX=9606 GN=IGLV1-44 PE=1 SV=2	NA	NA	NA	NA	NA	NA	NA	NA	0.753772	0.950066	0.935234	0.970769	1.03333	1.19094	1.19681	1.06231	1.11891	1.4653	1.2633	1.36075	1.25041	1.76957	1.06098	1.03068	0.760331	0.648105	0.940435	0.958932	0.468558	0.698872	0.763394	0.848684	0.595098	0.537412	NA	NA	NA	NA	NA	NA	NA	NA	NA	NA	NA	NA	NA
P01700	IGLV1-47	Immunoglobulin lambda variable 1-47 OS=Homo sapiens OX=9606 GN=IGLV1-47 PE=1 SV=2	0.781653	1.00208	0.935753	0.807929	0.997646	1.21058	1.15958	1.06821	0.932516	1.13061	1.06962	1.08591	1.36831	1.36292	1.26707	1.01445	0.925304	0.885092	0.938156	0.930837	0.959397	0.77577	0.978809	0.863938	0.918977	0.900813	0.909597	1.09748	1.03125	1.24591	1.00996	0.849332	0.97522	0.862801	1.86917	1.38377	1.09179	0.832833	0.906953	0.786163	1.04986	0.757701	0.756336	0.683115	1.5065	0.913388	1.15437
P01701	IGLV1-51	Immunoglobulin lambda variable 1-51 OS=Homo sapiens OX=9606 GN=IGLV1-51 PE=1 SV=2	1.29963	1.4757	1.20941	0.838103	0.981731	0.874724	0.74391	0.957205	1.10903	1.29397	1.07081	1.03699	1.4282	1.65577	1.45256	1.05804	1.01847	1.0629	1.10489	0.986711	0.905446	0.81881	0.906199	0.810116	0.896826	0.875027	0.725074	0.983638	1.24065	1.46703	1.0847	0.886136	1.4102	1.1118	1.50347	1.29675	1.44363	1.17194	1.02883	1.06703	1.49164	1.09255	0.924471	0.837987	1.42603	0.870551	0.856307
P01703	IGLV1-40	Immunoglobulin lambda variable 1-40 OS=Homo sapiens OX=9606 GN=IGLV1-40 PE=1 SV=2	NA	NA	NA	NA	NA	NA	NA	NA	1.09036	1.51835	1.12366	0.804855	1.09589	0.891619	0.774534	0.639626	1.12334	1.27059	1.21773	1.0697	0.870732	0.771159	0.883193	0.806921	1.06459	1.07111	0.923638	0.795095	0.970567	1.29666	0.563778	0.532443	0.684442	0.639936	0.552942	0.465031	0.554708	0.472013	0.966606	0.92601	0.859637	0.709414	0.681649	0.549694	1.40942	0.616597	1.67981
P01704	IGLV2-14	Immunoglobulin lambda variable 2-14 OS=Homo sapiens OX=9606 GN=IGLV2-14 PE=1 SV=2	1.77892	1.75991	1.62169	1.32143	1.34518	1.37774	1.22061	1.17601	0.991923	1.28547	1.08832	0.830528	1.13619	1.01206	1.0242	0.852517	0.981187	1.00647	1.02584	1.04066	1.45488	1.02591	0.821425	0.801514	0.875938	0.861069	1.18847	1.66555	1.03562	1.24462	1.47202	1.08282	0.968148	0.817505	1.41902	1.23997	1.0829	0.994884	1.49009	1.49734	1.22357	1.02257	1.11682	0.78769	NA	NA	NA
P01706	IGLV2-11	Immunoglobulin lambda variable 2-11 OS=Homo sapiens OX=9606 GN=IGLV2-11 PE=1 SV=2	3.00257	2.42217	2.44715	1.63614	0.878248	0.739745	0.591111	0.587312	1.11188	1.40649	1.21976	1.06792	1.31695	1.65887	1.25041	1.02236	0.705247	0.938742	1.3143	1.28788	1.00222	0.712914	1.24151	1.00445	0.849862	0.839848	1.67319	1.728	0.998545	1.09498	1.56201	1.18452	0.953497	0.80257	1.19922	1.03634	0.869224	0.935883	0.829032	0.862263	0.997923	0.896329	0.782141	0.587883	1.63354	0.44476	0.663515
P01709	IGLV2-8	Immunoglobulin lambda variable 2-8 OS=Homo sapiens OX=9606 GN=IGLV2-8 PE=1 SV=2	1.16223	1.48617	1.0643	0.958334	1.13202	1.38357	0.950659	1.2308	1.45508	1.77842	1.55833	1.51866	1.65531	2.02006	2.06079	1.65795	1.04957	1.30197	1.55186	1.39349	1.01066	0.646356	0.976979	0.867839	1.02527	0.940174	0.809667	0.814677	0.950264	1.23971	0.841713	0.631564	0.838801	0.749812	1.3358	1.20047	0.958068	0.931611	0.949145	1.09809	0.985344	0.922679	1.12054	1.14512	1.51477	0.705198	0.948356
P01714	IGLV3-19	Immunoglobulin lambda variable 3-19 OS=Homo sapiens OX=9606 GN=IGLV3-19 PE=1 SV=2	1.06866	1.69455	1.88648	1.33848	1.48267	1.34546	1.09073	1.29343	1.15645	1.43843	1.15357	1.07699	1.37755	1.19292	1.36907	1.04594	0.7733	0.838394	1.06408	1.15221	1.73833	2.11888	1.03936	0.796916	0.674318	0.73489	1.05651	1.29226	1.05878	1.41785	3.20051	1.16239	0.9015	0.822678	0.441504	0.401953	0.458852	0.330289	0.353064	0.339504	0.508951	0.407169	0.600152	0.537151	0.293921	0.322752	0.223214
P01717	IGLV3-25	Immunoglobulin lambda variable 3-25 OS=Homo sapiens OX=9606 GN=IGLV3-25 PE=1 SV=2	1.02498	1.26953	1.13989	1.04138	1.02363	1.22944	1.04725	1.18386	1.05044	1.29424	1.11899	0.947896	1.11265	1.14711	1.13832	1.13296	0.910039	1.03311	1.13226	1.04732	0.981867	0.827998	0.788728	0.736215	1.0949	1.18173	1.10634	1.29182	1.11628	1.28877	1.3103	1.28334	1.46856	1.58063	1.61284	1.16862	1.365	1.11891	1.42375	1.58469	1.77215	1.33756	1.66336	1.71737	1.23149	1.07535	1.53709
P01718	IGLV3-27	Immunoglobulin lambda variable 3-27 OS=Homo sapiens OX=9606 GN=IGLV3-27 PE=1 SV=2	0.961461	1.03577	1.0601	0.841305	1.50347	3.16148	2.23907	1.42198	1.15061	1.6027	1.39069	1.30224	0.982072	1.11412	0.949935	1.19848	0.9584	1.27748	1.27059	1.17911	1.22774	1.34108	1.81365	1.42494	1.25058	1.06113	0.993988	0.84569	1.06481	1.24358	0.921336	0.743395	1.05966	0.958201	NA	NA	NA	NA	NA	NA	NA	NA	NA	NA	0.62369	0.463969	0.499757
P01721	IGLV6-57	Immunoglobulin lambda variable 6-57 OS=Homo sapiens OX=9606 GN=IGLV6-57 PE=1 SV=2	NA	NA	NA	NA	NA	NA	NA	NA	1.00243	1.18148	0.928259	1.23251	1.44303	1.90686	1.54628	1.07631	0.63446	0.880442	1.31631	1.0949	1.31294	1.28049	1.5421	1.15565	NA	NA	NA	NA	NA	NA	NA	NA	NA	NA	NA	NA	NA	NA	NA	NA	NA	NA	NA	NA	NA	NA	NA
P01742	IGHV1-69	Immunoglobulin heavy variable 1-69 OS=Homo sapiens OX=9606 GN=IGHV1-69 PE=1 SV=2	1.01017	1.37297	1.25745	0.896577	0.894095	1.04768	0.886197	1.06467	0.931999	1.1343	1.05037	1.08433	1.26716	1.5357	1.52965	1.32042	0.794765	1.12912	1.24868	1.13233	1.1369	1.06799	1.19947	1.00716	0.878674	0.851454	1.08877	1.7188	0.885031	1.15285	1.01515	0.886136	0.792235	0.80157	1.21092	1.02947	0.833815	0.792619	1.33951	1.59295	0.843173	0.806642	0.902814	0.726885	1.00055	0.982003	0.608994
P01743	IGHV1-46	Immunoglobulin heavy variable 1-46 OS=Homo sapiens OX=9606 GN=IGHV1-46 PE=1 SV=2	0.812252	1.12327	1.1704	0.934651	1.1691	1.71785	1.33173	1.03951	0.661173	0.979828	1.14132	1.42316	1.14306	1.61586	1.95762	1.7106	0.641624	1.18665	0.938221	0.970971	0.87206	0.864597	1.30152	1.0829	1.11095	1.43197	1.0242	1.60192	1.00069	1.06017	1.62169	1.23997	1.0601	0.945206	1.07736	0.938156	4.91912	3.48703	1.38886	1.71523	1.06076	1.47304	1.63467	1.19391	NA	NA	NA
P01762	IGHV3-11	Immunoglobulin heavy variable 3-11 OS=Homo sapiens OX=9606 GN=IGHV3-11 PE=1 SV=2	0.591356	0.693371	0.68658	0.741439	1.47192	1.4566	1.08658	0.884602	NA	NA	NA	NA	NA	NA	NA	NA	NA	NA	NA	NA	NA	NA	NA	NA	NA	NA	NA	NA	NA	NA	NA	NA	NA	NA	NA	NA	NA	NA	NA	NA	NA	NA	NA	NA	NA	NA	NA
P01763	IGHV3-48	Immunoglobulin heavy variable 3-48 OS=Homo sapiens OX=9606 GN=IGHV3-48 PE=1 SV=2	NA	NA	NA	NA	NA	NA	NA	NA	NA	NA	NA	NA	NA	NA	NA	NA	0.848626	1.03555	1.24902	1.30958	1.14417	0.910922	1.08591	1.045	NA	NA	NA	NA	NA	NA	NA	NA	NA	NA	NA	NA	NA	NA	NA	NA	NA	NA	NA	NA	NA	NA	NA
P01764	IGHV3-23	Immunoglobulin heavy variable 3-23 OS=Homo sapiens OX=9606 GN=IGHV3-23 PE=1 SV=2	0.583943	0.750123	0.880503	0.77389	0.849567	1.61597	1.25606	0.903127	0.674224	0.839731	0.879832	1.07856	0.975761	1.34779	1.69772	1.46256	0.535367	0.867418	0.939132	0.915924	1.2251	1.08237	0.914655	0.873512	1.02983	1.10888	1.00298	1.25762	0.8631	1.08403	1.12459	1.08643	1.53421	1.52838	0.7769	0.809442	0.766416	1.23988	1.22978	1.55057	0.753197	0.94063	0.970164	1.10145	1.0403	0.817505	1.30568
P01766	IGHV3-13	Immunoglobulin heavy variable 3-13 OS=Homo sapiens OX=9606 GN=IGHV3-13 PE=1 SV=2	0.891125	1.09134	0.823077	0.633098	1.07229	1.09901	0.890693	1.16457	0.888165	1.09513	0.854824	0.8679	1.2743	1.41206	1.52098	1.25414	1.31412	1.53592	1.60503	1.51761	1.06703	0.772711	1.11481	1.20105	0.691308	0.718271	1.2578	3.70764	1.39658	1.6674	1.32262	0.984798	1.0064	0.939848	1.01656	0.840489	0.774587	0.630776	0.943046	0.886075	0.790151	0.847274	0.805524	0.676283	0.36977	0.310378	0.251129
P01767	IGHV3-53	Immunoglobulin heavy variable 3-53 OS=Homo sapiens OX=9606 GN=IGHV3-53 PE=1 SV=2	0.668778	1.08749	0.816882	0.775071	0.807369	1.08058	1.10611	1.42949	0.822051	0.879466	0.968148	0.946779	1.13312	1.38578	1.32998	1.14942	NA	NA	NA	NA	NA	NA	NA	NA	NA	NA	NA	NA	NA	NA	NA	NA	NA	NA	NA	NA	NA	NA	NA	NA	NA	NA	NA	NA	NA	NA	NA
P01780	IGHV3-7	Immunoglobulin heavy variable 3-7 OS=Homo sapiens OX=9606 GN=IGHV3-7 PE=1 SV=2	0.875938	0.99048	0.782737	0.619725	0.937051	0.97847	0.729257	0.887488	0.997093	1.23413	1.11257	1.06548	1.43545	1.45065	1.31485	1.11651	0.853463	1.10489	1.1708	1.06503	1.01995	0.688868	0.889706	0.680421	0.891805	0.859339	0.860711	0.898381	1.04638	1.32869	1.24393	0.999653	1.03025	1.00486	1.20481	1.01995	0.964665	0.897572	0.835841	0.86802	0.994953	0.860472	1.05563	1.03828	1.81152	0.808489	1.19433
P01782	IGHV3-9	Immunoglobulin heavy variable 3-9 OS=Homo sapiens OX=9606 GN=IGHV3-9 PE=1 SV=2	0.990068	1.49226	1.4283	1.07646	1.17731	1.06164	1.06444	1.41372	1.00424	1.34397	1.32547	1.43893	1.22723	1.29729	1.29424	1.4574	1.22876	1.67993	1.4935	1.47918	1.45135	1.0284	1.20464	1.06629	1.08643	1.04023	0.933356	1.4103	1.064	1.1332	1.13249	1.45035	1.3632	1.01206	0.345534	0.373039	0.401898	0.382174	0.340777	0.43398	0.339128	0.463487	0.358837	0.291951	0.467228	0.445501	0.670124
P01814	IGHV2-70	Immunoglobulin heavy variable 2-70 OS=Homo sapiens OX=9606 GN=IGHV2-70 PE=1 SV=2	NA	NA	NA	NA	NA	NA	NA	NA	NA	NA	NA	NA	NA	NA	NA	NA	NA	NA	NA	NA	NA	NA	NA	NA	0.748929	0.705442	0.782249	0.752728	0.736573	1.03785	0.49141	0.463166	0.68968	0.641535	0.609923	0.676424	1.10934	0.890446	0.834047	0.903502	0.78404	0.618523	1.02968	0.957736	NA	NA	NA
P01817	IGHV2-5	Immunoglobulin heavy variable 2-5 OS=Homo sapiens OX=9606 GN=IGHV2-5 PE=1 SV=2	0.755708	0.900376	0.735705	0.5982	0.961594	1.12327	0.873633	1.48854	1.24989	1.39881	1.09437	1.14401	1.24773	1.31385	1.09172	1.1029	0.979352	1.14989	1.18723	1.1354	1.10129	1.08073	1.39146	0.905634	0.85299	0.839266	0.774212	1.0511	1.01452	1.32905	0.797469	1.47161	1.08305	0.78933	0.80296	0.647387	0.774587	0.754033	0.526863	0.569394	0.902688	0.706225	0.705149	0.883131	1.41726	0.436696	0.735552
P01833	PIGR	Polymeric immunoglobulin receptor OS=Homo sapiens OX=9606 GN=PIGR PE=1 SV=4	1.33108	1.85832	2.22484	1.66451	1.09407	1.35463	1.47468	1.32079	0.615316	0.773943	0.802515	1.06762	0.83168	0.914338	0.899441	0.940239	0.924407	1.28049	0.790151	0.807201	0.669242	0.671659	1.03641	0.957271	1.53783	1.01396	1.07267	0.978742	0.770731	0.821937	0.938937	0.823077	0.860233	0.822849	2.15591	1.62552	1.84805	1.14148	0.628942	0.716928	0.92383	0.838626	1.04088	0.846863	0.415005	0.5404	0.601401
P01834	IGKC	Immunoglobulin kappa constant OS=Homo sapiens OX=9606 GN=IGKC PE=1 SV=2	1.00243	1.16918	0.936792	0.772496	1.08591	1.17674	0.994608	1.1743	1.07274	1.3422	1.06829	0.902188	1.30134	1.20715	1.09036	0.976912	0.865677	0.984866	1.19367	1.0557	0.996886	0.823648	0.858208	0.703977	0.933615	0.902438	1.00647	1.25745	1.0743	1.35952	0.882764	0.844108	0.842822	0.807201	1.06201	0.845104	0.957205	0.783009	0.95145	0.919168	1.23542	0.961194	1.02933	0.868682	1.32629	0.825706	1.01769
P01859	IGHG2	Immunoglobulin heavy constant gamma 2 OS=Homo sapiens OX=9606 GN=IGHG2 PE=1 SV=2	1.30667	1.40464	1.05023	0.852871	1.27262	1.26374	0.93504	1.20983	0.991854	1.38944	0.971307	0.788564	1.44754	1.26707	1.09255	0.885706	1.11157	1.16409	1.32813	1.20522	1.31248	1.20305	1.06585	1.04297	1.09809	1.0654	1.11915	1.16878	1.365	1.72692	0.90576	0.803183	0.974139	0.851513	0.956476	0.80207	0.545821	0.435034	0.586377	0.599612	0.603782	0.51792	0.701493	0.615786	1.18304	0.377959	0.817279
P01860	IGHG3	Immunoglobulin heavy constant gamma 3 OS=Homo sapiens OX=9606 GN=IGHG3 PE=1 SV=2	1.25275	1.57735	2.08435	2.28659	1.50295	1.76003	1.25684	1.50995	0.886996	1.29549	0.952836	0.791466	1.48957	1.3154	1.16078	0.941413	0.970836	1.08147	1.42237	1.3143	1.55542	1.16239	1.25998	1.05059	1.16127	1.12568	1.21858	1.2518	1.30867	1.64855	1.16111	0.964531	0.849273	0.715339	0.966204	0.694574	0.7452	0.539689	0.573951	0.632571	0.674037	0.572203	0.668778	0.586214	0.867599	0.349049	0.440648
P01861	IGHG4	Immunoglobulin heavy constant gamma 4 OS=Homo sapiens OX=9606 GN=IGHG4 PE=1 SV=1	0.782358	0.769024	0.70554	0.706127	1.02108	0.979013	1.00919	1.01762	1.0344	1.08508	0.89888	0.854884	1.74521	1.64935	1.40425	1.29146	1.32547	1.32391	1.1391	1.13745	0.961527	0.828515	0.885276	0.762918	1.05044	1.03987	1.5195	2.31209	0.795757	1.04384	0.755393	0.692603	0.668917	0.625031	0.378667	0.374309	0.513025	0.429164	0.80413	0.78057	0.875998	0.729814	0.871517	0.795592	0.472832	0.463358	0.914782
P01871	IGHM	Immunoglobulin heavy constant mu OS=Homo sapiens OX=9606 GN=IGHM PE=1 SV=4	0.667389	0.849744	0.855951	0.671286	1.00125	1.12678	1.09399	0.899441	0.669938	0.773139	0.734737	0.755603	1.13155	1.23072	1.19723	1.1628	0.988971	1.11775	0.918849	0.876606	0.630951	0.702028	0.918531	0.835841	0.802682	0.844225	0.814959	0.720115	0.84253	0.984525	1.52056	1.29164	1.08749	1.13022	0.802292	0.746182	1.46439	1.36566	0.886136	0.805022	1.44975	1.15077	1.28833	1.20339	0.816939	0.525368	1.0344
P01876	IGHA1	Immunoglobulin heavy constant alpha 1 OS=Homo sapiens OX=9606 GN=IGHA1 PE=1 SV=2	1.02683	1.36216	1.50765	1.1267	0.965468	1.03713	1.13422	1.12451	0.990068	1.02434	1.00528	1.04297	1.21765	1.31695	1.35632	1.34873	0.902876	1.01797	0.815129	0.800459	1.19449	1.31997	1.38041	1.15653	1.28449	1.17731	0.887181	1.16586	1.05636	1.14449	1.15053	1.03333	1.05074	0.993092	1.28165	0.944289	0.890816	0.665403	0.927231	0.855239	1.01748	0.79196	0.935494	0.919678	0.932451	0.606425	1.04616
P01877	IGHA2	Immunoglobulin heavy constant alpha 2 OS=Homo sapiens OX=9606 GN=IGHA2 PE=1 SV=4	NA	NA	NA	NA	NA	NA	NA	NA	1.00271	0.889521	1.2869	1.2131	0.764506	0.866157	0.874179	0.517095	1.52637	1.15277	1.26655	1.01663	1.58381	1.32823	1.41775	0.993988	1.29316	1.0398	1.14591	1.06548	1.2013	1.22374	1.15045	1.01924	0.869706	0.764453	NA	NA	NA	NA	NA	NA	NA	NA	NA	NA	NA	NA	NA
P01889	HLA-B	HLA class I histocompatibility antigen, B alpha chain OS=Homo sapiens OX=9606 GN=HLA-B PE=1 SV=3	0.94442	1.0398	1.12436	1.98949	1.24677	1.23576	1.02555	1.10435	1.1135	1.21268	0.767213	0.786326	1.16159	1.1628	1.0372	0.859995	0.638341	0.687771	0.595924	0.63578	0.733008	0.808545	0.816769	0.94783	0.955879	0.980643	1.74315	3.76696	1.01199	1.57538	0.834451	0.866938	1.10558	1.10934	NA	NA	NA	NA	NA	NA	NA	NA	NA	NA	NA	NA	NA
P02042	HBD	Hemoglobin subunit delta OS=Homo sapiens OX=9606 GN=HBD PE=1 SV=2	0.971375	1.03412	1.45851	4.88548	1.06955	1.19036	0.843699	1.13895	0.533071	1.26848	0.757386	0.838336	0.729662	0.815298	0.670263	2.12564	0.523913	0.815807	0.545518	0.725828	0.810453	0.565814	0.692987	0.428302	1.52467	1.26681	1.02073	0.933162	0.938872	1.03354	0.977725	1.47366	1.04732	1.32712	1.67075	0.930579	1.3477	0.704123	0.956542	1.08185	0.701979	1.01248	0.848508	0.919423	1.03276	0.888781	1.01677
P02144	MB	Myoglobin OS=Homo sapiens OX=9606 GN=MB PE=1 SV=2	2.96267	0.994815	1.67075	3.00674	1.17829	1.26085	1.3705	3.73653	NA	NA	NA	NA	NA	NA	NA	NA	NA	NA	NA	NA	NA	NA	NA	NA	NA	NA	NA	NA	NA	NA	NA	NA	NA	NA	NA	NA	NA	NA	NA	NA	NA	NA	NA	NA	NA	NA	NA
P02461	COL3A1	Collagen alpha-1(III) chain OS=Homo sapiens OX=9606 GN=COL3A1 PE=1 SV=4	0.892918	1.20005	2.06709	0.994608	1.01776	1.31859	1.5066	2.03651	NA	NA	NA	NA	NA	NA	NA	NA	NA	NA	NA	NA	NA	NA	NA	NA	NA	NA	NA	NA	NA	NA	NA	NA	NA	NA	NA	NA	NA	NA	NA	NA	NA	NA	NA	NA	NA	NA	NA
P02545	LMNA	Prelamin-A/C OS=Homo sapiens OX=9606 GN=LMNA PE=1 SV=1	0.913578	1.05973	1.31449	1.75042	1.32363	1.42287	1.89816	2.80539	NA	NA	NA	NA	NA	NA	NA	NA	1.24842	0.978674	1.52764	0.88835	0.658247	0.576943	0.770411	0.781653	NA	NA	NA	NA	NA	NA	NA	NA	NA	NA	NA	NA	NA	NA	NA	NA	NA	NA	NA	NA	NA	NA	NA
P02647	APOA1	Apolipoprotein A-I OS=Homo sapiens OX=9606 GN=APOA1 PE=1 SV=1	0.526462	0.582326	0.585767	0.61506	0.892114	0.724069	0.735654	0.632922	0.759331	0.843465	0.904567	0.829895	1.00542	1.1078	0.97976	1.17642	0.627288	0.902501	0.60891	0.611786	0.609881	0.819491	0.79229	1.10834	0.95482	1.16401	0.860532	0.879771	0.974882	1.24513	0.938156	1.12615	1.46175	1.72979	1.19003	1.06807	1.03183	1.02385	1.31722	1.55445	1.37831	1.48844	0.955415	1.15117	1.00424	1.51761	0.950659
P02649	APOE	Apolipoprotein E OS=Homo sapiens OX=9606 GN=APOE PE=1 SV=1	1.57113	1.14132	1.25432	1.02052	1.3668	1.17251	1.20239	0.990412	1.19864	1.15261	0.747321	1.13249	0.810284	1.06083	0.867238	1.31814	0.982276	0.973194	0.793499	0.994953	0.793444	0.883438	1.00125	1.16393	0.727238	1.17887	1.28414	0.984048	1.0743	0.883009	1.13966	0.878674	1.70764	1.27819	0.726432	0.897946	1.14798	0.988491	0.898693	1.40425	1.05577	1.24212	1.2662	1.56049	1.43903	1.6537	0.958201
P02652	APOA2	Apolipoprotein A-II OS=Homo sapiens OX=9606 GN=APOA2 PE=1 SV=1	0.415264	0.38582	0.395569	0.451532	0.68179	0.599404	0.636001	0.548894	0.680751	0.519142	0.607434	0.608446	0.746803	0.844811	0.702953	0.529022	0.460828	0.5373	0.319946	0.347865	0.40932	0.626593	0.547185	0.77491	0.887119	1.05548	0.516414	0.686818	0.688439	1.1068	0.730067	0.990755	1.28913	1.60581	1.0808	0.997854	1.00201	1.08013	1.22281	1.33247	1.30134	1.32804	0.934198	1.01903	1.04124	1.59361	1.29003
P02654	APOC1	Apolipoprotein C-I OS=Homo sapiens OX=9606 GN=APOC1 PE=1 SV=1	1.0793	1.06363	1.05365	1.45226	1.36094	1.23851	1.3435	1.52869	0.871275	1.07908	1.11396	1.03634	1.46034	1.56613	1.14862	0.903252	0.685867	0.934651	0.686771	0.701055	0.715836	0.716878	0.763659	0.840139	1.50441	1.50713	1.26146	1.2466	1.06599	1.34826	1.01185	1.21025	1.8767	1.83312	1.92733	1.44043	1.2894	1.28165	1.85498	2.05423	2.15129	2.20641	1.48165	1.64855	1.19557	1.49942	1.49682
P02655	APOC2	Apolipoprotein C-II OS=Homo sapiens OX=9606 GN=APOC2 PE=1 SV=1	0.902501	0.761808	0.994332	1.59229	0.815524	0.862323	1.1837	1.42188	0.608066	0.809162	0.60462	0.60257	1.02463	0.877761	0.713013	0.797248	0.622006	0.772764	0.795757	0.84698	0.512598	0.515913	0.754713	0.852635	1.93294	1.24643	1.41755	1.22502	0.682405	0.998338	0.546768	0.711976	0.975829	0.950923	1.33007	0.833873	0.444976	0.514378	1.52605	1.26164	1.13989	1.00278	1.20372	1.26199	0.820571	1.07908	1.43197
P02656	APOC3	Apolipoprotein C-III OS=Homo sapiens OX=9606 GN=APOC3 PE=1 SV=1	0.679667	0.47185	0.610727	1.07796	0.643718	0.458343	0.670961	0.57153	0.717226	0.987327	0.647387	0.627767	0.819832	0.706078	0.628289	1.11219	0.556556	0.589842	0.695152	0.947173	0.567582	0.731282	0.841771	1.11775	0.996817	0.943373	1.30758	1.01762	0.767639	1.13328	0.570856	0.750175	0.917195	0.999515	1.14195	0.813436	0.614847	0.561828	1.17952	1.34099	1.01473	0.941609	1.25284	1.37031	1.016	1.22027	1.11752
P02671	FGA	Fibrinogen alpha chain OS=Homo sapiens OX=9606 GN=FGA PE=1 SV=2	1.81718	0.427205	0.973869	1.37287	1.32721	1.02562	1.19466	0.555747	1.67412	1.1088	0.557522	1.82197	0.451063	1.59815	0.553863	0.704953	1.53826	0.505506	0.53027	0.885399	1.36794	1.31248	1.61362	1.45953	0.357199	1.30017	0.875331	0.462011	1.40913	0.41911	1.93495	0.407593	1.41372	0.462781	0.548286	1.40376	2.15218	1.53762	0.513345	1.46409	1.33265	1.60625	1.90448	1.22256	2.30425	1.37421	1.68249
P02675	FGB	Fibrinogen beta chain OS=Homo sapiens OX=9606 GN=FGB PE=1 SV=2	1.89711	0.553632	1.12327	1.46115	1.51656	1.20706	1.31933	0.650942	1.54018	1.06873	0.560272	1.7274	0.475593	1.53517	0.583175	0.734432	1.6696	0.604578	0.636221	1.00479	1.54435	1.45448	1.87631	1.61138	0.460541	1.36595	0.887488	0.526827	1.3879	0.514128	1.8221	0.511711	1.43903	0.54514	0.480164	1.11512	1.58832	1.21968	0.47837	1.17381	1.0304	1.24324	1.46358	0.960861	1.33173	0.886075	1.05424
P02679	FGG	Fibrinogen gamma chain OS=Homo sapiens OX=9606 GN=FGG PE=1 SV=3	1.91826	0.462845	1.07631	1.50629	1.46662	1.18517	1.24954	0.617923	1.7074	1.15685	0.563935	1.82387	0.475395	1.64262	0.565187	0.775823	1.65038	0.500277	0.549999	0.965735	1.46764	1.41676	1.7364	1.52488	0.408894	1.46744	0.912629	0.49955	1.51257	0.495583	1.91229	0.441168	1.50379	0.536779	0.499654	1.18559	1.74219	1.28708	0.457328	1.25823	1.06733	1.31759	1.51887	1.02712	1.49672	0.979352	1.12631
P02724	GYPA	Glycophorin-A OS=Homo sapiens OX=9606 GN=GYPA PE=1 SV=2	NA	NA	NA	NA	NA	NA	NA	NA	0.69771	0.878857	0.971981	0.792015	1.90871	2.0289	1.40737	1.21773	0.509728	0.675066	0.536258	0.684157	1.12358	0.68863	0.765195	0.660944	NA	NA	NA	NA	NA	NA	NA	NA	NA	NA	NA	NA	NA	NA	NA	NA	NA	NA	NA	NA	NA	NA	NA
P02730	SLC4A1	Band 3 anion transport protein OS=Homo sapiens OX=9606 GN=SLC4A1 PE=1 SV=3	1.08561	0.839441	1.19615	1.99101	1.16538	0.793169	1.04442	1.38905	0.777762	1.95423	1.02328	0.816146	1.09741	0.953761	1.3567	1.40133	0.925369	1.24143	0.447947	0.555054	1.29765	0.658064	1.06039	0.382492	1.11427	1.31467	1.0314	1.04304	1.10038	1.27094	1.23542	1.25911	1.47274	0.80413	NA	NA	NA	NA	NA	NA	NA	NA	NA	NA	1.38799	0.632878	1.67946
P02741	CRP	C-reactive protein OS=Homo sapiens OX=9606 GN=CRP PE=1 SV=1	1.01896	1.90924	2.96308	1.29504	1.20497	1.72345	1.72441	1.5066	0.746441	0.615359	1.19806	2.08305	1.2812	1.33154	2.16235	0.75891	1.49433	1.66624	1.20172	0.808153	1.3333	0.49107	1.51414	0.514128	0.282319	0.315344	0.727289	0.703587	0.457581	0.305597	1.18083	0.543744	0.405535	0.258673	0.682405	0.204476	1.73917	0.13199	0.342316	0.143528	0.355372	0.175094	0.310314	0.114419	1.48452	0.333833	0.701639
P02743	APCS	Serum amyloid P-component OS=Homo sapiens OX=9606 GN=APCS PE=1 SV=2	1.04182	1.08222	1.28735	0.910922	1.11589	1.05343	1.29433	0.746234	1.06349	1.00389	0.934004	0.913641	1.19094	1.28895	1.15245	1.15821	0.711877	0.980711	1.04081	1.09969	1.07826	1.01614	1.1303	0.994057	1.383	1.08561	1.36689	1.3463	1.0601	1.14878	0.973937	1.02392	0.965401	0.932774	1.61183	0.868381	1.57877	0.79653	1.31403	0.99654	1.27024	0.742982	1.1657	0.892361	1.30858	0.810565	1.46165
P02745	C1QA	Complement C1q subcomponent subunit A OS=Homo sapiens OX=9606 GN=C1QA PE=1 SV=2	1.05995	1.06836	1.3853	1.10611	1.15413	1.34248	1.18157	1.0148	0.923638	0.895025	0.946648	0.928259	1.01199	1.15349	1.05351	0.990412	1.08817	1.51121	1.4148	1.43316	1.33432	1.38013	1.49267	1.36009	1.46236	1.49796	1.53837	1.60993	1.20773	1.29945	1.05563	1.1128	1.35191	1.18239	NA	NA	NA	NA	NA	NA	NA	NA	NA	NA	0.802181	0.603489	0.596916
P02746	C1QB	Complement C1q subcomponent subunit B OS=Homo sapiens OX=9606 GN=C1QB PE=1 SV=3	1.05614	1.12756	1.20514	0.924984	1.34118	1.08358	1.33663	1.0134	0.97847	0.990961	1.04921	1.1855	1.21411	1.2089	1.23302	1.14926	0.872605	1.17805	1.07207	1.11188	1.02904	0.977996	1.33099	1.28574	1.13139	1.08915	1.17259	1.19077	1.11969	1.10282	1.21327	1.20589	1.23012	1.01797	0.933939	0.755812	0.903627	0.635736	0.881969	0.730218	1.05409	0.768278	1.06142	0.732804	0.902	0.780083	0.931934
P02747	C1QC	Complement C1q subcomponent subunit C OS=Homo sapiens OX=9606 GN=C1QC PE=1 SV=3	0.824162	0.846393	0.982276	0.74758	0.860532	0.892918	0.876484	0.669567	0.945206	0.967276	0.972183	1.03526	1.13729	1.25466	1.11713	1.10565	0.734075	1.00076	0.929869	1.00431	0.97847	0.910417	1.00173	0.973599	1.0805	1.03362	1.01157	1.08681	1.01185	1.14934	0.953695	1.02925	1.06644	0.983707	1.21985	1.04001	1.11304	0.953629	0.943438	0.986848	1.05402	0.961261	1.10872	1.01889	1.33007	1.0946	1.1636
P02748	C9	Complement component C9 OS=Homo sapiens OX=9606 GN=C9 PE=1 SV=2	1.09179	0.6134	1.08523	1.27271	1.39484	1.42178	1.18978	0.651528	1.12467	0.809386	0.78187	1.25136	0.899129	1.56038	0.951516	0.821311	1.24031	0.997508	0.823477	1.09051	1.33932	1.22442	1.4798	1.25606	0.67544	0.982208	1.29999	0.779327	1.04834	0.599861	1.47243	0.763818	0.938481	0.59415	1.00076	0.890137	1.98522	0.847039	0.744839	0.804576	1.13958	0.873936	1.19698	0.656743	1.82538	0.808265	1.45226
P02749	APOH	Beta-2-glycoprotein 1 OS=Homo sapiens OX=9606 GN=APOH PE=1 SV=3	0.951055	0.991236	1.21201	1.06091	1.12249	1.18206	1.24057	0.998892	0.710448	0.852576	0.938546	0.94514	1.04066	1.24358	1.10244	1.24531	1.00368	1.23345	1.1911	1.26997	1.29873	1.3765	1.25223	1.75857	1.40221	1.46115	1.25597	1.34201	1.02477	1.23055	1.19053	1.28271	1.25989	1.36879	0.728197	0.649724	0.629117	0.596875	0.538531	0.557135	0.613825	0.581278	0.547944	0.591275	0.386596	0.506874	0.532886
P02750	LRG1	Leucine-rich alpha-2-glycoprotein OS=Homo sapiens OX=9606 GN=LRG1 PE=1 SV=2	0.890014	1.16789	1.66336	1.06408	1.2084	1.58326	1.36349	1.30324	0.817845	0.76961	0.967813	1.35952	1.29092	1.50295	1.61407	0.988286	1.15453	1.38492	1.01052	0.843348	1.26989	0.92492	1.19781	0.849332	0.805078	0.723919	1.24418	1.26681	0.773086	0.716928	1.20991	1.02655	0.897634	0.826622	1.25232	0.647611	1.457	0.563661	0.867599	0.593903	1.2033	0.686818	0.843816	0.528436	1.46267	0.570303	0.828228
P02751	FN1	Fibronectin OS=Homo sapiens OX=9606 GN=FN1 PE=1 SV=5	0.701493	0.803795	0.908148	0.769184	0.909282	0.885768	0.954952	0.849449	0.700036	0.936337	0.974545	0.915036	1.28263	1.39165	1.11358	1.03068	0.709316	1.15789	0.786599	0.863818	0.851277	0.987738	0.747269	1.05944	1.31567	1.19069	1.0179	0.980235	1.09104	1.52056	0.995022	1.20372	0.942327	1.22468	1.04841	0.829205	0.700861	0.711778	1.23954	0.855536	1.02513	0.954886	0.654607	0.747736	0.784149	0.724973	0.836594
P02753	RBP4	Retinol-binding protein 4 OS=Homo sapiens OX=9606 GN=RBP4 PE=1 SV=3	0.838045	0.805468	0.993368	1.11296	0.88307	0.8284	1.20572	1.07878	0.686437	0.937831	0.793719	0.738208	0.95953	1.01932	0.726533	1.22901	0.933551	1.06799	1.30704	1.44273	1.06186	1.24014	1.03771	2.13672	1.71975	1.63955	1.20589	1.36576	1.05139	1.63331	1.01501	1.1425	1.56179	1.71916	0.606298	0.713408	0.473094	0.779867	0.594933	0.604871	0.550037	0.556479	0.574031	0.5982	0.380746	0.51363	0.533034
P02760	AMBP	Protein AMBP OS=Homo sapiens OX=9606 GN=AMBP PE=1 SV=1	1.02726	1.10152	1.26383	1.57363	1.2619	1.31212	1.47212	1.5195	0.929096	0.929676	1.01045	1.08095	1.09255	1.41157	1.1855	1.06334	1.0921	1.2285	0.976438	0.983979	1.33635	1.299	1.42474	1.8055	1.31576	1.30477	1.10903	1.36528	0.989245	1.16514	1.20097	1.27527	1.11558	1.17895	0.451031	0.387482	0.409008	0.337907	0.347143	0.324705	0.352159	0.305258	0.310744	0.307871	0.332724	0.364831	0.364199
P02763	ORM1	Alpha-1-acid glycoprotein 1 OS=Homo sapiens OX=9606 GN=ORM1 PE=1 SV=1	1.10834	1.4024	1.66786	1.45518	1.41147	1.50744	1.31558	1.06851	0.99516	0.884173	1.10634	1.186	1.34164	1.40192	1.56515	1.20247	1.7009	1.85215	1.43485	1.19532	1.52056	1.08448	1.37192	0.950527	1.22332	0.867839	1.35566	1.30686	0.83001	0.731536	1.03872	0.854469	0.874118	0.767958	0.700812	0.399786	0.676705	0.306105	0.463037	0.312797	0.592752	0.317252	0.49124	0.340116	0.391233	0.251547	0.297055
P02765	AHSG	Alpha-2-HS-glycoprotein OS=Homo sapiens OX=9606 GN=AHSG PE=1 SV=2	0.819207	0.647207	0.877761	1.1916	0.799794	0.864657	1.05885	1.37993	0.97847	0.798686	0.915924	1.05132	0.797856	1.12	0.951912	0.675581	1.10527	1.1055	0.769984	0.799572	0.995091	1.32253	1.15757	1.85266	1.0787	1.67632	0.966137	1.15245	0.81479	0.895149	1.32308	1.76211	1.51992	1.78547	0.636927	0.61238	0.672357	0.629946	0.637413	0.684537	0.634943	0.695055	0.570184	0.589515	0.561166	0.544121	0.477443
P02766	TTR	Transthyretin OS=Homo sapiens OX=9606 GN=TTR PE=1 SV=1	0.488964	0.499757	0.435637	0.436484	0.623733	0.4317	0.49107	0.487543	0.67273	0.842472	0.740771	0.763394	0.878248	0.910102	0.776038	1.05365	0.56456	0.773461	0.635472	0.805859	0.603991	0.816939	0.541938	1.05804	1.48813	1.41441	0.890261	0.945337	1.03455	1.37088	0.944878	1.00298	1.39146	1.26418	1.18271	1.45892	0.769504	1.51477	1.26945	1.68904	1.13532	1.37516	1.13792	1.59848	0.592957	0.99385	1.15165
P02768	ALB	Serum albumin OS=Homo sapiens OX=9606 GN=ALB PE=1 SV=2	0.858684	1.04594	0.988149	1.11954	1.16578	1.09962	1.21142	1.30179	0.744168	0.75419	0.926845	0.996126	0.869706	0.877214	0.897137	0.974139	1.15421	1.48885	1.5356	1.61038	1.33867	1.33293	1.15549	1.40085	1.12187	1.28645	0.82245	0.804408	0.935688	1.06644	0.977928	1.25989	1.23911	1.45085	0.552597	0.502014	0.430325	0.413598	0.490662	0.518638	0.547488	0.5	0.423285	0.502711	0.400036	0.43386	0.417341
P02774	GC	Vitamin D-binding protein OS=Homo sapiens OX=9606 GN=GC PE=1 SV=2	1.01248	1.09741	1.32565	1.17397	1.17202	1.13619	1.12709	0.960528	0.921336	0.800348	0.953431	0.961994	1.02569	1.27633	1.30351	0.990892	1.05365	1.11435	0.861367	0.836073	1.18567	1.17593	1.07125	1.32786	1.18329	1.19789	0.935364	1.16595	0.776254	0.871577	1.06725	1.11628	1.21866	1.33136	1.27324	0.894405	1.12545	0.766098	0.818526	0.757071	0.747891	0.628507	0.719367	0.701104	0.714596	0.880503	1.03419
P02775	PPBP	Platelet basic protein OS=Homo sapiens OX=9606 GN=PPBP PE=1 SV=3	1.38252	1.55628	0.805915	0.72608	0.538045	0.490593	0.51452	0.35921	1.50129	1.07743	1.2669	0.986643	0.942719	0.864837	0.827195	0.785019	1.90409	1.08787	1.12163	1.03254	1.41755	1.63139	1.09308	1.20991	1.7035	0.899877	0.729561	1.02733	1.34892	1.10336	1.09164	2.09885	0.953629	1.61967	0.563974	0.708579	0.479466	0.784421	0.841596	0.717922	0.56601	0.701055	0.682027	0.801792	0.528766	0.690733	0.643361
P02776	PF4	Platelet factor 4 OS=Homo sapiens OX=9606 GN=PF4 PE=1 SV=2	1.33997	1.48968	1.02052	0.706274	0.960861	0.713112	0.626072	0.590046	1.49092	1.3217	1.44553	1.25545	1.02776	1.03161	1.09475	0.898817	1.64057	1.20623	1.12857	1.07893	1.35519	1.40776	1.06334	1.07594	2.36854	1.9441	1.29936	1.42632	1.55154	1.45427	1.17227	1.44884	0.722615	1.05812	0.649815	0.730674	0.62179	0.778571	1.0808	0.798298	0.991442	0.755289	1.20197	0.810172	0.803628	0.723116	0.801514
P02786	TFRC	Transferrin receptor protein 1 OS=Homo sapiens OX=9606 GN=TFRC PE=1 SV=2	0.776469	0.691404	0.917703	1.15373	0.902376	1.00926	0.751164	0.842472	0.890137	0.942654	0.932968	0.95145	0.959929	1.02236	0.861905	0.879405	0.875755	0.852635	0.809106	0.857554	0.772443	0.949671	0.980779	0.997992	0.889521	1.08073	1.13634	0.994057	1.00361	1.05438	1.08546	0.943896	1.64947	2.07628	1.42395	1.31613	1.07341	0.95953	1.12998	1.29864	1.08252	1.05585	1.05629	1.07527	1.20222	0.898257	1.01861
P02787	TF	Serotransferrin OS=Homo sapiens OX=9606 GN=TF PE=1 SV=3	0.700424	0.770464	0.910102	0.987327	1.16006	1.00898	0.999792	0.927809	0.760595	0.852812	0.795702	0.774265	0.913895	1.04819	0.901625	0.893537	1.21504	1.4799	0.954753	0.964933	1.08613	1.29801	0.979081	1.4063	1.39387	1.39862	1.11311	1.13343	0.968752	1.26208	1.03749	1.37402	1.26392	1.38415	0.757753	0.622394	0.664527	0.603322	0.823991	0.881663	0.719916	0.650987	0.639094	0.581359	0.405985	0.665495	0.552176
P02788	LTF	Lactotransferrin OS=Homo sapiens OX=9606 GN=LTF PE=1 SV=6	0.545443	1.80989	2.31017	3.03543	0.754608	0.682878	0.970029	0.807425	0.86334	1.51729	1.04117	1.44543	1.18206	1.44764	1.21765	2.01001	0.708137	0.921336	0.707352	0.694478	1.06172	0.602653	1.37573	0.567424	1.51551	0.883499	1.01298	0.822849	1.08719	1.06659	1.04102	2.04926	0.692699	0.800959	0.656424	0.7607	0.708775	0.734279	0.783443	0.788673	0.710152	0.748617	0.879527	0.799406	1.44193	1.13469	1.35595
P02790	HPX	Hemopexin OS=Homo sapiens OX=9606 GN=HPX PE=1 SV=2	1.03033	1.04493	1.02697	0.783497	1.20089	1.11985	0.913325	0.650987	0.911049	1.00744	1.05541	1.03083	1.10473	1.24617	1.12803	1.30351	1.15982	1.38645	1.11721	1.10405	1.13194	1.12016	1.08824	1.20723	1.25771	1.15397	1.17381	1.05219	1.04037	1.13611	1.1628	1.2084	1.09346	1.02484	1.22927	0.947764	1.22978	0.928259	1.02342	0.922679	1.23473	1.00222	0.999099	0.890384	0.926845	0.895646	0.950396
P03950	ANG	Angiogenin OS=Homo sapiens OX=9606 GN=ANG PE=1 SV=1	1.09217	1.13524	1.30188	0.906513	0.856129	1.40932	1.75297	0.939327	1.074	1.27156	1.33895	1.12967	1.01354	1.22078	1.09771	1.56906	1.18206	1.23868	1.31942	1.36661	1.39581	1.45619	1.15829	1.93348	1.15902	1.29477	0.996748	0.852162	0.886566	1.00989	0.883254	1.15501	1.17202	1.15029	NA	NA	NA	NA	NA	NA	NA	NA	NA	NA	NA	NA	NA
P03951	F11	Coagulation factor XI OS=Homo sapiens OX=9606 GN=F11 PE=1 SV=1	0.910922	0.906136	0.826622	0.711482	0.923574	1.15573	1.06356	0.78187	0.85364	0.945664	0.978131	0.894467	1.11907	1.12358	1.08922	0.958533	1.28032	1.42583	1.29765	1.32409	1.30441	1.15189	1.2447	1.17993	1.20439	1.12405	1.16151	1.11103	1.07841	1.20372	1.03555	0.999307	0.946845	1.02342	1.46378	1.11597	1.67958	1.30921	1.06777	1.00744	1.11404	0.955283	1.07975	1.02797	1.30233	1.04124	1.51687
P03952	KLKB1	Plasma kallikrein OS=Homo sapiens OX=9606 GN=KLKB1 PE=1 SV=1	0.94187	0.905634	0.939393	0.90576	1.02363	0.941087	0.959264	0.923254	0.893352	1.0615	0.99103	0.882336	1.08455	1.15813	1.0674	1.11605	1.09232	1.27845	0.948553	0.973397	1.15405	1.19806	1.0314	1.29954	1.43008	1.32924	1.21067	1.18863	1.00884	1.21352	1.15189	1.07676	1.24427	1.29585	1.11095	0.90463	1.00598	0.964331	1.01677	1.03677	1.13824	0.885583	1.08185	0.94875	0.653292	0.70466	0.782846
P03973	SLPI	Antileukoproteinase OS=Homo sapiens OX=9606 GN=SLPI PE=1 SV=2	1.33617	1.2758	2.86871	1.65485	1.57636	1.66971	2.44274	2.21468	NA	NA	NA	NA	NA	NA	NA	NA	1.3396	1.41137	1.96251	1.9587	2.01922	3.96494	1.47816	2.25355	NA	NA	NA	NA	NA	NA	NA	NA	NA	NA	NA	NA	NA	NA	NA	NA	NA	NA	NA	NA	NA	NA	NA
P04003	C4BPA	C4b-binding protein alpha chain OS=Homo sapiens OX=9606 GN=C4BPA PE=1 SV=2	0.859876	0.962728	1.00396	0.7803	1.07185	1.1135	0.972992	0.858863	0.928259	0.943307	0.95568	0.882948	1.20999	1.25466	1.10328	0.818072	0.989862	1.1414	0.927873	0.919295	1.07587	0.963462	1.30288	1.09066	1.51645	1.16127	1.08983	1.24418	0.97976	1.1042	0.813548	0.917258	0.990824	1.07467	1.23243	0.83047	1.282	0.913641	1.41372	1.14377	1.44183	1.06231	1.0064	0.733516	0.988423	0.683541	0.909787
P04004	VTN	Vitronectin OS=Homo sapiens OX=9606 GN=VTN PE=1 SV=1	0.91548	0.703294	0.976979	1.23021	1.06784	1.10942	0.919933	0.828745	0.992336	0.880808	0.799295	1.11149	0.770892	1.35538	0.862502	0.992404	1.26892	0.929805	0.611405	0.757123	1.11992	1.18042	1.42701	1.38847	0.958998	1.49786	1.14782	0.714695	0.997231	0.843465	1.28521	0.804743	1.20472	0.861725	0.473193	0.532038	1.15133	0.850215	0.641668	0.946123	0.817845	0.904505	1.03369	0.96788	0.534922	0.615444	0.624338
P04040	CAT	Catalase OS=Homo sapiens OX=9606 GN=CAT PE=1 SV=3	1.17846	1.10267	1.28245	2.30521	1.20623	1.33728	1.08508	1.24031	0.853285	1.14401	0.921336	0.922742	1.11954	1.06003	1.03987	1.40425	0.797192	0.888104	1.06585	1.12763	0.88093	0.742519	0.866517	0.801959	1.14005	0.956542	1.0167	0.947304	1.0073	1.13879	0.922998	1.04232	0.933033	0.887673	1.2999	0.817619	1.10168	0.778841	1.16417	1.10588	0.969088	0.945075	1.0269	0.941413	0.973599	0.67287	0.853522
P04066	FUCA1	Tissue alpha-L-fucosidase OS=Homo sapiens OX=9606 GN=FUCA1 PE=1 SV=4	NA	NA	NA	NA	NA	NA	NA	NA	0.980983	0.962861	0.972318	1.16918	0.762072	1.19102	0.986164	1.00779	1.01995	1.30613	1.02612	1.12826	1.0314	1.1805	1.1042	1.32777	0.843816	1.09825	1.27218	1.11806	0.851572	0.912376	1.27536	1.35726	1.17373	1.28378	NA	NA	NA	NA	NA	NA	NA	NA	NA	NA	NA	NA	NA
P04070	PROC	Vitamin K-dependent protein C OS=Homo sapiens OX=9606 GN=PROC PE=1 SV=1	0.787199	0.747476	0.905822	0.687151	0.786872	0.672544	0.661494	0.6134	0.871637	0.945206	0.962461	0.752154	0.963596	1.082	0.873694	1.21596	0.632834	0.796088	0.647297	0.769397	0.658292	0.697614	0.682925	0.914909	1.29828	1.19574	0.980915	1.08546	1.04283	1.22859	1.03104	1.19623	1.04138	1.039	1.3878	1.18493	1.27253	1.24643	1.18026	1.25858	1.39474	1.22697	1.27394	1.14782	1.12218	1.38905	1.31012
P04075	ALDOA	Fructose-bisphosphate aldolase A OS=Homo sapiens OX=9606 GN=ALDOA PE=1 SV=2	1.29253	0.874724	1.0546	1.58151	0.951318	1.12865	0.992817	1.19152	1.10934	0.812196	1.12857	0.937311	1.07371	0.831968	0.86802	0.966137	1.34639	1.05285	1.00111	0.876484	0.946189	0.837697	0.899752	0.731282	1.17601	0.660028	1.23183	1.01319	0.941478	0.845924	0.696261	0.967075	0.635957	0.941609	1.06533	1.30704	1.04841	1.54799	1.13579	0.979081	1.02591	1.35538	1.0329	1.28343	1.19681	1.12249	1.03627
P04080	CSTB	Cystatin-B OS=Homo sapiens OX=9606 GN=CSTB PE=1 SV=2	NA	1.99695	2.73208	1.94235	1.55909	NA	1.78398	2.64359	1.14029	0.796861	0.805804	0.912819	0.612763	0.59762	0.724973	0.428896	0.99654	1.15205	0.987464	1.15269	1.17789	1.74933	1.03505	1.039	NA	NA	NA	NA	NA	NA	NA	NA	NA	NA	NA	NA	NA	NA	NA	NA	NA	NA	NA	NA	NA	NA	NA
P04114	APOB	Apolipoprotein B-100 OS=Homo sapiens OX=9606 GN=APOB PE=1 SV=2	0.981187	0.913641	1.06755	0.949145	0.932904	1.04319	0.984389	0.712272	1.07945	1.01635	1.04333	1.12685	0.965535	1.10061	1.00765	0.997093	0.894529	1.02236	0.94187	0.961794	0.854706	0.837406	0.999861	0.996126	1.15517	1.11922	0.848155	0.881847	0.950725	1.02591	1.01917	1.22205	0.96393	1.02705	1.19665	0.907016	0.913515	0.83851	1.12795	1.17462	1.1235	1.02826	1.15869	0.996195	1.78102	1.29981	1.29379
P04179	SOD2	Superoxide dismutase [Mn], mitochondrial OS=Homo sapiens OX=9606 GN=SOD2 PE=1 SV=3	1.93657	0.690637	1.19276	0.758541	1.00354	1.11466	0.8461	0.716382	NA	NA	NA	NA	NA	NA	NA	NA	1.36358	0.67849	2.97028	1.27165	1.18181	0.890199	0.599819	0.911996	NA	NA	NA	NA	NA	NA	NA	NA	NA	NA	NA	NA	NA	NA	NA	NA	NA	NA	NA	NA	NA	NA	NA
P04180	LCAT	Phosphatidylcholine-sterol acyltransferase OS=Homo sapiens OX=9606 GN=LCAT PE=1 SV=1	0.738311	0.772764	0.763077	0.746286	0.89969	0.822564	0.801848	0.801625	0.867238	0.961794	0.971846	0.982957	0.980439	1.34267	1.09794	0.875452	0.965802	1.05285	0.832949	0.872726	1.07356	1.01748	1.0289	0.993988	1.3616	1.41461	0.974747	1.00968	0.933227	1.23816	1.15829	1.36888	1.43714	1.28307	1.01417	1.01939	0.984525	0.745459	0.962061	1.00305	1.07267	0.92601	0.937636	0.754242	1.44824	1.12109	1.00097
P04196	HRG	Histidine-rich glycoprotein OS=Homo sapiens OX=9606 GN=HRG PE=1 SV=1	0.83422	1.07646	0.962194	0.648555	0.665172	0.83024	0.809554	0.652251	0.900751	0.952572	1.1228	1.24729	1.01305	1.51246	1.41942	0.872605	0.775017	1.07044	0.645147	0.639803	0.922167	1.22757	0.691068	1.06592	1.33422	1.47396	0.865377	1.18394	0.983707	1.34826	1.51351	1.54521	1.46368	1.66209	1.11698	1.08155	1.06334	1.1487	0.959065	1.27341	1.04297	1.30026	0.779435	1.10519	0.804687	0.913388	0.846041
P04211	IGLV7-43	Immunoglobulin lambda variable 7-43 OS=Homo sapiens OX=9606 GN=IGLV7-43 PE=3 SV=2	0.897261	0.966539	0.779759	0.669753	0.815977	1.13697	0.889397	0.868501	NA	NA	NA	NA	NA	NA	NA	NA	0.924215	1.18091	1.22459	1.0802	0.879344	1.55898	0.964598	0.647701	0.813661	0.709562	0.918467	0.764877	1.16304	1.25867	2.8479	1.04565	1.34555	1.21125	1.0714	0.768864	0.872423	0.911049	1.072	1.00912	1.76345	1.52341	1.36538	1.27359	2.18874	0.774587	1.25397
P04217	A1BG	Alpha-1B-glycoprotein OS=Homo sapiens OX=9606 GN=A1BG PE=1 SV=4	0.84078	0.922231	1.0487	0.958068	1.07267	1.04522	0.937636	0.834336	0.885952	0.853995	0.94442	1.01811	1.00382	1.21302	1.15325	0.894467	0.996333	1.09278	0.880625	0.860949	1.01087	1.05161	1.02975	1.11042	1.13611	1.06061	0.922167	1.0538	0.894467	0.990274	1.21108	1.35079	1.09263	1.11473	1.21243	0.878613	1.18937	0.762971	0.929418	0.828573	1.15998	0.950857	0.837465	0.736369	0.977792	0.969357	0.899316
P04264	KRT1	Keratin, type II cytoskeletal 1 OS=Homo sapiens OX=9606 GN=KRT1 PE=1 SV=6	0.526571	1.03433	0.51907	0.531264	0.544046	0.524059	0.475692	0.5484	0.426288	0.483672	0.313318	0.402986	0.341155	0.361233	0.292397	0.360232	0.216794	0.200684	0.197264	0.182732	0.202178	0.175385	0.347648	0.180654	0.475527	0.674318	0.265871	0.395212	0.317758	0.328713	0.452629	0.331183	0.303128	0.78366	0.454295	0.453791	0.23681	0.226817	0.214626	0.261703	0.502397	0.326194	0.336762	0.561984	0.371208	0.358737	0.34683
P04275	VWF	von Willebrand factor OS=Homo sapiens OX=9606 GN=VWF PE=1 SV=4	1.17936	1.19516	1.56982	1.32116	1.21243	1.29262	1.23559	1.47693	1.05914	1.31942	1.24634	1.2861	1.38742	1.20932	1.18296	1.31896	0.857911	1.4283	1.23997	1.06821	1.06673	0.896702	0.906639	0.845279	1.15589	0.795371	1.38482	1.26874	1.00347	1.52277	1.23089	1.4205	1.00035	1.22213	1.15181	0.612423	0.620456	0.379692	0.933615	0.322551	0.56503	0.392047	0.472144	0.332632	0.599279	0.447017	0.400563
P04278	SHBG	Sex hormone-binding globulin OS=Homo sapiens OX=9606 GN=SHBG PE=1 SV=2	0.604075	0.475297	0.706862	0.6711	0.956873	1.21251	1.12912	0.749968	0.794765	0.654017	0.488625	0.754922	0.586783	1.01607	0.620413	0.513665	0.776469	0.68925	0.514592	0.598988	0.706519	1.18075	1.3854	1.27606	0.62903	0.906199	0.6952	0.580875	0.870551	0.619596	2.28406	0.929225	1.49195	1.02193	0.769664	1.32271	1.141	1.27615	0.606467	1.11822	1.8767	2.96432	0.592177	0.676143	1.40182	1.10061	0.770037
P04406	GAPDH	Glyceraldehyde-3-phosphate dehydrogenase OS=Homo sapiens OX=9606 GN=GAPDH PE=1 SV=3	1.09741	0.778301	0.887673	1.71689	0.929612	0.886812	0.668176	0.704026	1.47212	0.804241	0.680421	0.883376	0.553747	0.709562	0.477774	0.988012	1.11157	0.648375	0.644343	0.7776	0.853522	1.03419	0.850805	0.914592	0.674037	0.981459	0.981459	0.62964	1.55315	0.674364	0.786326	1.78906	0.856544	1.04935	0.747891	1.61586	0.925689	1.73773	0.709808	1.0309	0.908904	1.61541	1.16603	1.70764	1.13611	1.73712	1.29217
P04424	ASL	Argininosuccinate lyase OS=Homo sapiens OX=9606 GN=ASL PE=1 SV=4	1.72369	1.0829	1.12685	0.977318	1.23602	1.27659	1.10826	0.902438	0.487543	0.526535	0.59514	0.612465	0.635296	0.682925	0.68392	0.844459	1.46673	0.823991	2.31819	1.58063	0.80491	0.678725	0.66628	0.602653	0.969962	0.737543	0.847274	0.672264	0.81321	0.852753	1.47355	0.867839	0.796916	0.662963	NA	0.666927	0.468526	1.56255	0.793884	1.40114	0.392319	0.522934	0.608783	NA	NA	NA	NA
P04430	IGKV1-16	Immunoglobulin kappa variable 1-16 OS=Homo sapiens OX=9606 GN=IGKV1-16 PE=1 SV=2	0.888535	0.971846	1.06017	1.19574	1.39852	1.22222	1.12983	1.36386	1.11667	1.14806	1.27112	1.25206	1.15477	1.31212	1.20581	0.924343	0.710743	0.891619	0.985754	1.0344	1.04254	0.895956	0.988628	0.862682	1.12576	1.13887	1.02811	1.03915	0.935234	1.05322	0.894963	0.956608	0.914972	1.02087	1.2262	0.740771	1.48072	0.800237	1.61183	1.24505	1.39455	0.910986	1.33626	1.13705	1.14179	1.11304	1.63898
P04432	IGKV1D-39	Immunoglobulin kappa variable 1D-39 OS=Homo sapiens OX=9606 GN=IGKV1D-39 PE=3 SV=2	NA	NA	NA	NA	NA	NA	NA	NA	1.24031	1.49309	1.19524	1.18279	1.24816	1.138	0.997854	1.09748	0.994539	1.21529	1.31321	1.24651	1.06666	0.746596	0.930579	0.804074	0.931676	0.91834	1.27412	1.54875	1.08802	1.28761	1.20239	1.20756	1.14854	1.13516	NA	NA	NA	NA	NA	NA	NA	NA	NA	NA	NA	NA	NA
P04433	IGKV3-11	Immunoglobulin kappa variable 3-11 OS=Homo sapiens OX=9606 GN=IGKV3-11 PE=1 SV=1	0.94829	1.12928	0.892671	0.708431	0.94875	1.05944	0.985276	1.15637	1.10168	1.28761	1.08673	0.962928	1.32409	1.24496	1.11304	0.934651	0.946058	1.06747	1.20999	1.12093	1.05001	0.779219	0.835609	0.742776	0.965535	0.973667	1.05176	1.14457	1.07908	1.32143	1.02122	0.944682	0.836362	0.854884	0.947042	0.808377	0.881053	0.716233	0.757963	0.772603	1.02236	0.901625	0.900688	0.770678	1.60614	0.935559	1.32097
P04439	HLA-A	HLA class I histocompatibility antigen, A alpha chain OS=Homo sapiens OX=9606 GN=HLA-A PE=1 SV=2	1.50608	1.38847	1.34332	2.1255	1.51771	1.31067	1.20539	1.20648	1.50285	1.2633	1.21125	1.23362	0.7142	0.739899	0.664665	0.592341	1.71428	2.09333	1.15157	1.63773	1.38636	1.3536	1.44133	1.5174	0.665818	0.778409	2.04372	1.92332	0.823077	0.754504	0.696213	0.769397	1.44203	1.619	0.874906	0.754451	0.885829	0.757018	0.631958	0.615999	0.741645	0.626593	0.885952	0.644075	0.703538	0.783171	2.46861
P04632	CAPNS1	Calpain small subunit 1 OS=Homo sapiens OX=9606 GN=CAPNS1 PE=1 SV=1	0.999446	0.861905	1.12975	1.69784	1.37621	1.62856	1.10244	0.971981	1.17251	0.930385	1.00668	1.01073	1.61664	1.37487	1.05154	1.30767	1.60036	1.02392	1.45377	1.10313	1.32869	1.25466	1.1354	0.905069	1.80863	0.946189	1.23132	1.23851	1.57429	1.33136	0.959863	1.46429	0.977183	1.37202	0.264218	0.52297	0.214746	0.17917	0.21427	0.156312	0.192923	0.175252	0.183544	0.170105	0.864118	0.72432	0.983161
P04792	HSPB1	Heat shock protein beta-1 OS=Homo sapiens OX=9606 GN=HSPB1 PE=1 SV=2	0.992955	0.646356	0.778139	1.25275	0.716481	0.619639	0.663193	0.693996	2.08118	0.8631	0.837755	1.01572	0.831219	0.651122	0.602319	0.599113	0.729814	0.626462	0.57149	0.682547	0.724622	0.856723	0.83979	0.686247	NA	NA	NA	NA	NA	NA	NA	NA	NA	NA	0.979624	1.64924	1.38626	1.86684	1.04986	1.09285	1.44583	1.93348	1.87228	1.81768	1.17536	1.55941	1.34779
P05062	ALDOB	Fructose-bisphosphate aldolase B OS=Homo sapiens OX=9606 GN=ALDOB PE=1 SV=2	2.10848	0.753772	0.918786	0.689155	1.00187	0.655651	0.725677	0.71852	0.701395	0.719666	0.826049	0.82114	0.676799	0.845396	0.835377	1.76908	1.97712	0.910417	1.8264	1.78349	1.0279	0.967008	0.885399	0.837929	1.0289	0.939783	0.863519	0.784312	0.929289	0.968417	1.93254	0.887365	1.07743	0.814338	0.987669	0.935753	0.788182	0.926267	0.618995	1.13713	0.69602	1.30958	0.946123	0.601568	0.744529	0.500624	0.877335
P05090	APOD	Apolipoprotein D OS=Homo sapiens OX=9606 GN=APOD PE=1 SV=1	1.3724	1.16167	0.961661	1.05482	1.45902	1.15205	0.993574	0.990617	1.04696	1.18863	1.05416	0.972183	1.15365	1.1088	0.914338	0.969559	1.43774	1.5658	0.937831	0.946582	1.29101	1.37497	1.572	1.542	1.01206	1.00132	0.908652	0.889521	1.32859	1.61552	0.963596	1.13832	1.15445	1.16635	0.951912	0.707107	0.785945	0.503373	0.937116	0.845104	0.937831	0.671659	0.735399	0.716133	0.65198	0.528509	0.673197
P05091	ALDH2	Aldehyde dehydrogenase, mitochondrial OS=Homo sapiens OX=9606 GN=ALDH2 PE=1 SV=2	1.27907	1.43784	2.65829	2.06766	0.653972	0.585646	0.499654	0.587516	0.959996	1.07848	0.990617	0.827195	1.02335	0.853877	0.764877	0.729358	NA	NA	NA	NA	NA	NA	NA	NA	NA	NA	NA	NA	NA	NA	NA	NA	NA	NA	NA	NA	NA	NA	NA	NA	NA	NA	NA	NA	NA	NA	NA
P05106	ITGB3	Integrin beta-3 OS=Homo sapiens OX=9606 GN=ITGB3 PE=1 SV=2	NA	NA	NA	NA	NA	NA	NA	NA	1.19906	0.973464	0.865377	1.02052	0.775393	0.872786	0.852162	0.822849	NA	NA	NA	NA	NA	NA	NA	NA	NA	NA	NA	NA	NA	NA	NA	NA	NA	NA	0.920953	1.08282	0.893909	0.842764	0.81383	1.25972	1.06319	0.908463	0.99516	0.92287	1.28886	1.2326	1.0717
P05109	S100A8	Protein S100-A8 OS=Homo sapiens OX=9606 GN=S100A8 PE=1 SV=1	1.06784	1.11026	1.6465	1.91441	1.87774	5.62518	1.32024	1.8245	1.20139	0.847979	0.783769	1.19119	1.15157	1.15669	0.914719	1.84357	0.927681	0.989862	1.39697	0.899628	0.762865	0.505506	1.75018	0.55122	0.49141	0.386543	1.2886	0.569355	0.483906	0.453068	0.657152	0.449128	0.317626	0.270106	0.332287	0.275324	0.496822	0.225703	0.257421	0.243434	0.272004	0.240365	0.420915	0.312906	0.502745	0.393272	0.423578
P05121	SERPINE1	Plasminogen activator inhibitor 1 OS=Homo sapiens OX=9606 GN=SERPINE1 PE=1 SV=1	0.95482	1.02278	0.981459	1.20983	1.28976	0.979624	1.73748	2.273	1.16926	1.19474	1.15309	1.16659	0.95482	0.681507	0.869405	0.729308	1.34416	0.964866	0.955747	0.958002	0.798243	1.16611	0.938807	1.07497	NA	NA	NA	NA	NA	NA	NA	NA	NA	NA	NA	NA	NA	NA	NA	NA	NA	NA	NA	NA	NA	NA	NA
P05154	SERPINA5	Plasma serine protease inhibitor OS=Homo sapiens OX=9606 GN=SERPINA5 PE=1 SV=3	0.864597	0.551411	0.64238	0.583984	0.795592	0.673197	0.871456	0.663653	1.11698	0.878248	0.944485	0.786435	0.466711	0.741542	0.779489	1.04514	0.712519	0.800903	1.14258	1.16368	0.772496	0.986575	0.799628	1.50535	1.48607	1.02883	0.788947	1.01572	0.992748	1.04972	1.22162	1.24246	1.85935	1.72154	1.74364	1.7735	0.566953	0.519322	1.30477	1.93589	1.27447	1.55952	1.24263	0.402511	0.99813	2.28818	0.619983
P05155	SERPING1	Plasma protease C1 inhibitor OS=Homo sapiens OX=9606 GN=SERPING1 PE=1 SV=2	1.03333	1.01755	1.13053	1.06142	1.30622	1.1475	1.05907	0.930256	0.940696	0.963997	0.938026	0.959198	1.16288	1.27624	1.18912	1.18493	1.05826	1.18945	1.00208	0.960129	1.06696	0.86083	1.21159	1.0576	1.46034	1.06629	1.19532	1.09574	1.02797	1.00835	0.976776	0.960195	1.01953	1.016	1.38357	0.864717	1.22553	0.634723	1.20849	0.907582	1.41549	0.865377	1.0041	0.519322	1.12179	0.845162	0.81626
P05156	CFI	Complement factor I OS=Homo sapiens OX=9606 GN=CFI PE=1 SV=2	1.07609	1.13564	1.3582	1.34416	1.26208	1.28538	1.14298	1.03828	0.852694	0.903064	1.00257	0.94442	1.24505	1.32345	1.299	1.03699	1.53379	1.76565	1.32446	1.22519	1.43664	1.32519	1.60303	1.51121	1.26813	1.10297	1.34294	1.66682	1.00173	1.07542	1.15005	1.17218	0.997508	1.03025	0.590251	0.390069	0.564443	0.34748	0.454011	0.354093	0.511498	0.371131	0.431042	0.343814	0.432688	0.367929	0.435124
P05160	F13B	Coagulation factor XIII B chain OS=Homo sapiens OX=9606 GN=F13B PE=1 SV=3	1.12023	1.09437	0.965401	0.990961	1.15237	0.966941	1.04124	1.07475	1.0179	1.15141	1.03541	0.90796	1.18214	1.1846	1.08576	1.03168	1.46561	1.36207	1.10918	1.10053	1.39707	1.24513	1.39378	1.50431	1.60737	1.37335	1.03491	1.30876	1.08493	1.29262	1.19789	1.27077	1.22723	1.3477	0.90532	0.780841	1.08177	0.825134	0.76631	0.733668	0.820059	0.701979	0.725426	0.578785	0.607518	0.631432	0.561711
P05164	MPO	Myeloperoxidase OS=Homo sapiens OX=9606 GN=MPO PE=1 SV=1	NA	NA	NA	NA	NA	NA	NA	NA	NA	NA	NA	NA	NA	NA	NA	NA	0.777492	0.804631	0.994539	0.945337	0.818129	0.854587	1.03498	0.755603	NA	NA	NA	NA	NA	NA	NA	NA	NA	NA	0.696261	0.622135	0.843406	0.684489	0.679479	0.693179	0.926267	1.14766	0.779219	0.662917	NA	NA	NA
P05198	EIF2S1	Eukaryotic translation initiation factor 2 subunit 1 OS=Homo sapiens OX=9606 GN=EIF2S1 PE=1 SV=3	0.625855	0.965602	0.732449	0.624252	0.981595	0.932386	0.633932	1.23097	NA	NA	NA	NA	NA	NA	NA	NA	0.123956	0.0543001	0.0641281	0.0891513	0.0787869	0.0816049	0.0559468	0.0649017	0.824448	0.70159	1.87631	1.34481	5.13121	4.95162	1.6017	1.6449	1.26734	0.856841	NA	NA	NA	NA	NA	NA	NA	NA	NA	NA	NA	NA	NA
P05362	ICAM1	Intercellular adhesion molecule 1 OS=Homo sapiens OX=9606 GN=ICAM1 PE=1 SV=2	1.05088	1.21909	1.4872	1.21016	1.00305	1.16352	1.06807	1.16054	0.741131	0.859459	1.1632	1.25867	0.968551	1.16595	1.26611	1.29199	0.995712	1.23004	1.16999	1.36651	0.884173	0.820742	0.836942	0.863878	1.09939	1.059	0.886689	0.868682	0.725778	0.873755	0.807817	0.942981	0.932063	1.11775	0.50881	0.463583	0.443191	0.427234	0.420856	0.406323	0.407056	0.352746	0.356853	0.36216	0.435185	0.377644	0.399564
P05452	CLEC3B	Tetranectin OS=Homo sapiens OX=9606 GN=CLEC3B PE=1 SV=3	1.15037	0.937246	1.08824	0.793664	0.779813	0.631432	0.687533	0.533404	0.985071	0.996678	0.99585	0.95482	0.865977	0.85228	0.890199	0.87321	0.850038	0.839499	0.707695	0.710201	0.805804	0.878796	0.921464	0.960262	1.26068	1.49485	0.817505	0.843874	1.09657	1.06253	0.839848	0.975761	1.24169	1.64319	1.78831	1.35116	1.25597	0.998753	1.27969	1.94841	1.26129	1.30831	1.01284	1.22129	0.965468	1.58524	1.30785
P05543	SERPINA7	Thyroxine-binding globulin OS=Homo sapiens OX=9606 GN=SERPINA7 PE=1 SV=2	0.823134	0.870792	0.963395	0.93271	0.965669	0.983638	0.865197	0.922998	1.01361	0.898195	0.871577	0.976573	1.06563	1.18748	1.09924	0.862502	0.957205	1.00375	0.776953	0.80207	0.872847	0.870671	0.885829	0.920507	1.13832	1.25771	0.937636	1.01551	0.920507	0.994263	1.10366	1.2023	1.25545	1.31731	1.17895	0.85922	1.50493	1.13847	1.22918	1.20055	1.54735	1.34574	1.38944	1.42247	1.3084	1.09733	1.01523
P05546	SERPIND1	Heparin cofactor 2 OS=Homo sapiens OX=9606 GN=SERPIND1 PE=1 SV=3	0.635957	0.71857	0.768544	0.626853	0.821083	0.649679	0.575984	0.506172	0.779273	0.813097	1.02712	1.04493	0.964799	1.24324	1.1135	0.872181	0.944616	1.1765	0.802014	0.822849	0.971509	1.0172	0.952836	1.27403	1.66301	1.46561	0.937441	1.24885	0.955747	1.20932	1.14266	1.12842	1.18896	1.19922	1.35802	1.13179	1.33886	1.37564	1.44563	1.39368	1.21976	1.07766	1.39561	1.27828	0.876423	1.141	1.43117
P05556	ITGB1	Integrin beta-1 OS=Homo sapiens OX=9606 GN=ITGB1 PE=1 SV=2	1.60347	0.769077	1.22162	1.50264	1.19906	1.28369	0.863998	0.997508	1.43565	1.11165	0.709906	1.38127	0.550227	1.27377	0.604201	0.601902	NA	NA	NA	NA	NA	NA	NA	NA	NA	NA	NA	NA	NA	NA	NA	NA	NA	NA	0.716282	0.777977	0.720165	0.67031	0.78922	0.837	0.825477	0.805134	0.848273	0.964264	0.84329	1.4904	0.930708
P05976	MYL1	Myosin light chain 1/3, skeletal muscle isoform OS=Homo sapiens OX=9606 GN=MYL1 PE=1 SV=3	3.92366	1.63739	1.00382	1.66856	2.7057	2.15233	3.52592	2.11213	NA	NA	NA	NA	NA	NA	NA	NA	NA	NA	NA	NA	NA	NA	NA	NA	NA	NA	NA	NA	NA	NA	NA	NA	NA	NA	NA	NA	NA	NA	NA	NA	NA	NA	NA	NA	NA	NA	NA
P06276	BCHE	Cholinesterase OS=Homo sapiens OX=9606 GN=BCHE PE=1 SV=1	0.654924	0.626897	0.593451	0.634196	0.706519	0.702661	0.634328	0.654425	1.0225	1.01727	0.92524	0.805971	1.05197	1.08576	0.914592	0.755708	1.02038	1.04529	0.733567	0.766522	0.831276	0.817675	0.91548	1.05183	1.18723	1.21419	0.91764	0.858149	0.873452	1.09794	0.900376	0.962261	1.07259	1.30858	1.15069	1.04529	1.06503	1.15389	1.30568	1.33117	1.2174	1.09962	1.0826	1.14346	1.29828	1.20514	1.30858
P06310	IGKV2-30	Immunoglobulin kappa variable 2-30 OS=Homo sapiens OX=9606 GN=IGKV2-30 PE=3 SV=2	0.994746	1.12202	0.947239	0.706274	1.00264	1.14013	0.867539	1.02833	1.17373	1.49516	1.22671	1.00472	1.60915	1.39648	1.35435	1.24126	0.976979	1.10604	1.19367	1.05249	0.928774	0.656879	0.717475	0.552597	0.847509	0.835319	0.665957	0.765354	1.17993	1.5322	0.839906	0.820173	0.987806	1.00619	1.17121	0.899877	0.868863	0.73545	0.738208	0.730775	1.36547	1.16732	1.0896	1.07691	1.77289	0.661448	1.3262
P06312	IGKV4-1	Immunoglobulin kappa variable 4-1 OS=Homo sapiens OX=9606 GN=IGKV4-1 PE=1 SV=1	1.14155	1.27783	1.05863	0.858744	1.16183	1.21866	1.01515	1.2013	1.21909	1.50869	1.18904	0.913705	1.337	1.23123	1.05966	0.973127	1.09482	1.15453	1.2781	1.09847	1.11907	0.820742	0.896577	0.698872	0.95429	0.912186	0.970164	0.98214	1.03462	1.39978	0.855595	0.802348	0.875513	0.837058	1.08343	0.811183	1.02264	0.739386	0.776469	0.754033	1.02612	0.828056	0.753563	0.68179	1.01988	0.687866	0.790151
P06331	IGHV4-34	Immunoglobulin heavy variable 4-34 OS=Homo sapiens OX=9606 GN=IGHV4-34 PE=1 SV=2	0.82342	1.06091	1.20039	0.839091	0.954621	1.18698	1.01917	0.980167	0.807985	1.0141	0.997439	1.33746	1.10236	1.30017	1.31795	1.00104	0.752884	0.992955	1.17919	1.12724	1.23533	1.56017	0.893723	0.816033	1.05797	1.0487	0.963997	1.3879	1.11969	1.34388	1.19607	1.1487	1.13163	1.11234	1.18731	1.00139	0.910039	0.85051	0.976709	0.951648	0.937246	0.868381	0.822621	0.880564	1.02655	0.802237	0.880747
P06396	GSN	Gelsolin OS=Homo sapiens OX=9606 GN=GSN PE=1 SV=1	0.532665	0.441627	0.450375	0.438698	0.906513	0.707009	0.7452	0.639404	1.17056	1.10374	0.927681	0.902188	0.67849	0.898381	0.73954	0.949145	0.93045	0.726483	0.598822	0.737032	0.859995	1.03218	0.932322	1.1098	1.00452	1.38521	0.82302	0.837465	1.24617	1.15982	0.903815	0.956807	1.27324	1.47264	1.37974	1.48421	1.30858	1.38434	1.28547	1.83172	1.43973	1.62868	1.19565	1.47611	1.29801	1.40094	1.35472
P06454	PTMA	Prothymosin alpha OS=Homo sapiens OX=9606 GN=PTMA PE=1 SV=2	0.775985	0.731029	0.787253	1.26015	1.22825	1.3786	2.68477	3.02325	0.652161	0.533256	0.522101	1.10719	0.535144	0.607729	0.428421	0.775447	0.596957	0.472898	0.657927	0.775339	0.616768	0.63117	0.720215	0.586255	0.495687	0.619038	1.36936	2.40044	0.545859	0.542126	0.915099	0.438333	0.559263	0.317208	NA	NA	NA	NA	NA	NA	NA	NA	NA	NA	1.24643	1.58876	0.71529
P06681	C2	Complement C2 OS=Homo sapiens OX=9606 GN=C2 PE=1 SV=2	0.954886	0.982072	1.32189	1.17129	0.995298	1.04023	0.960728	0.850746	1.08862	0.943831	1.079	1.03111	1.0329	1.31085	1.16151	0.821368	0.666511	0.775339	0.814225	0.893042	0.989177	0.958533	1.10114	1.0714	1.18452	1.12865	1.19947	1.27562	0.953299	1.03448	0.905069	1.0949	1.02933	1.00389	1.30297	0.955349	1.43485	0.931224	1.03233	0.977792	1.13942	0.939523	1.09021	0.872423	1.46612	1.09771	1.32887
P06702	S100A9	Protein S100-A9 OS=Homo sapiens OX=9606 GN=S100A9 PE=1 SV=1	0.963529	1.10911	1.54489	1.864	1.78262	5.63885	1.26707	1.67435	1.18091	0.928774	0.889212	1.22315	1.20715	1.16191	0.911049	1.82804	0.894963	1.05511	1.23722	0.881725	0.756651	0.538792	1.36405	0.619596	0.574907	0.478503	1.19102	0.6134	0.536593	0.515591	0.694622	0.509198	0.402902	0.387965	0.476253	0.386516	0.601318	0.30924	0.389609	0.341581	0.388154	0.36686	0.556402	0.446862	0.484208	0.697034	0.566167
P06703	S100A6	Protein S100-A6 OS=Homo sapiens OX=9606 GN=S100A6 PE=1 SV=1	1.2291	1.39146	2.03031	5.22561	1.22893	1.3932	0.666834	1.0442	0.887365	1.11822	1.0127	1.00014	1.0087	0.92646	0.826393	1.92973	NA	NA	NA	NA	NA	NA	NA	NA	1.42721	0.846217	0.776792	0.822678	0.929289	0.90576	0.725225	1.1176	0.639581	0.866157	1.19549	1.53018	1.05008	1.23662	1.80513	1.09187	0.816712	1.49537	0.853936	1.76333	1.09187	1.27668	1.08847
P06727	APOA4	Apolipoprotein A-IV OS=Homo sapiens OX=9606 GN=APOA4 PE=1 SV=3	0.682121	0.457391	0.577103	1.04551	0.755917	0.66012	0.876059	0.55969	0.871517	1.09338	1.02038	0.959863	0.627419	0.839266	0.681554	1.87501	0.622869	0.644611	0.585727	0.834625	0.949869	1.23962	0.897883	1.42445	0.51363	1.14862	1.07319	0.785237	1.25032	1.01227	1.13863	0.922167	1.33413	1.25632	0.690063	1.41971	1.05278	1.28263	0.494383	1.57167	0.955349	1.31896	0.917068	1.1425	1.13611	1.74763	1.01642
P06729	CD2	T-cell surface antigen CD2 OS=Homo sapiens OX=9606 GN=CD2 PE=1 SV=2	NA	NA	NA	NA	NA	NA	NA	NA	NA	NA	NA	NA	NA	NA	NA	NA	2.6618	2.14488	2.16911	2.28897	0.83729	0.808825	0.803851	0.722265	NA	NA	NA	NA	NA	NA	NA	NA	NA	NA	NA	NA	NA	NA	NA	NA	NA	NA	NA	NA	NA	NA	NA
P06733	ENO1	Alpha-enolase OS=Homo sapiens OX=9606 GN=ENO1 PE=1 SV=2	0.963596	0.666049	0.969962	1.56298	1.17251	0.980575	0.770357	1.08117	1.656	0.78187	0.696309	1.15061	0.621532	0.865197	0.556981	0.882336	1.06459	0.613272	0.61664	0.82932	0.729611	1.13328	0.890323	0.924727	0.930321	1.02562	0.873876	0.664067	1.28958	0.891372	0.799406	1.00856	0.933421	0.886075	0.813379	1.84344	1.11412	2.35202	1.11651	1.47601	1.13879	2.1619	1.50964	2.31498	1.37602	2.05096	1.55531
P06737	PYGL	Glycogen phosphorylase, liver form OS=Homo sapiens OX=9606 GN=PYGL PE=1 SV=4	2.23876	0.915734	1.04044	1.1016	1.31869	1.54392	1.00975	1.30532	0.865257	0.824333	0.790041	1.03276	0.846804	1.02158	0.668547	1.07848	2.1022	0.980575	2.0223	1.23979	0.883989	0.862502	0.907708	0.822393	0.912945	0.793554	1.04427	0.760015	1.01143	0.899254	1.06113	1.01375	0.727793	1.04369	NA	NA	NA	NA	NA	NA	NA	NA	NA	NA	0.976709	0.979692	1.0025
P06744	GPI	Glucose-6-phosphate isomerase OS=Homo sapiens OX=9606 GN=GPI PE=1 SV=4	1.10168	0.656834	0.897448	0.938872	0.9705	0.981051	0.621015	0.617281	1.22027	0.95973	1.0087	1.26901	0.9705	1.11876	1.09756	1.83859	1.36311	0.902251	1.0213	1.07229	1.04797	0.976235	1.09164	0.88497	NA	NA	NA	NA	NA	NA	NA	NA	NA	NA	NA	NA	NA	NA	NA	NA	NA	NA	NA	NA	1.04478	0.946582	0.903127
P06753	TPM3	Tropomyosin alpha-3 chain OS=Homo sapiens OX=9606 GN=TPM3 PE=1 SV=2	0.651167	0.693948	0.895894	0.786981	0.67755	0.650355	0.913705	0.712667	1.19358	0.598656	0.986711	0.918467	1.40766	0.607434	0.874967	0.508176	1.29495	0.848331	0.805692	0.76716	0.908211	1.07564	0.815129	0.973262	1.66382	0.832199	0.985208	1.41265	1.0269	0.936986	0.689203	1.59052	0.791905	1.66221	0.845631	0.801792	0.76631	0.675019	0.746131	0.769344	0.88356	0.735298	0.838975	0.684347	1.05088	1.0503	0.933615
P07108	DBI	Acyl-CoA-binding protein OS=Homo sapiens OX=9606 GN=DBI PE=1 SV=2	0.813492	0.851926	1.04023	1.69103	0.901938	0.877578	1.24177	1.90646	1.25518	1.04638	0.954224	1.09217	1.0087	0.90125	0.784638	0.564756	0.941283	0.809218	0.950659	0.889829	0.967545	0.936467	0.958467	0.993368	1.05278	0.862502	1.11018	1.14377	1.5956	1.44613	1.29406	1.50014	0.866938	0.928324	0.647163	1.11111	0.522318	1.13398	1.43515	1.55445	0.998199	1.60547	0.998822	1.21293	NA	NA	NA
P07195	LDHB	L-lactate dehydrogenase B chain OS=Homo sapiens OX=9606 GN=LDHB PE=1 SV=2	0.785945	0.789275	0.962394	1.30776	1.17487	1.70598	1.29927	1.74872	1.15213	0.953166	1.11003	1.01953	1.10788	0.937116	0.851041	1.31576	1.05907	1.09285	0.888843	0.840197	0.844694	0.773729	0.934522	0.747839	1.2326	0.80335	1.26576	1.1299	1.14464	1.12397	0.874118	1.02321	0.752884	1.04543	1.14949	1.10229	0.92089	1.18731	1.25006	1.07125	0.962061	1.15453	1.02243	1.18542	1.20122	1.13816	1.1491
P07225	PROS1	Vitamin K-dependent protein S OS=Homo sapiens OX=9606 GN=PROS1 PE=1 SV=1	0.94285	0.942915	1.01066	0.756232	1.16886	1.24989	1.07706	0.765461	0.923254	0.951252	0.910228	0.84839	1.08771	1.272	1.059	0.917195	0.966137	1.11211	0.909471	0.95621	1.12553	1.13312	1.232	1.21226	1.35369	1.17748	1.23132	1.09142	0.980643	1.01642	0.915353	0.877578	1.10351	1.00703	1.12865	0.879283	1.06607	0.873936	1.09066	0.935818	1.08538	0.881602	0.865437	0.740104	0.705491	0.688725	0.732957
P07237	P4HB	Protein disulfide-isomerase OS=Homo sapiens OX=9606 GN=P4HB PE=1 SV=3	0.881297	0.880869	1.47468	1.48957	0.977792	0.911238	1.05643	1.07363	0.968887	0.775608	1.06511	0.961661	0.986985	0.91675	0.970634	0.79037	1.19657	0.920188	1.19267	0.892176	0.927231	0.945992	0.830988	0.805078	1.37259	0.870792	1.03764	1.28485	0.992817	1.04608	1.00912	1.29477	0.963262	1.22757	1.18929	1.37459	1.11165	1.27801	1.21546	1.08493	1.21243	1.31567	1.15461	1.25362	1.29495	1.20748	1.07177
P07307	ASGR2	Asialoglycoprotein receptor 2 OS=Homo sapiens OX=9606 GN=ASGR2 PE=1 SV=2	0.717723	0.80107	0.883989	1.7022	0.706127	0.958467	1.34248	1.31157	0.750331	0.790206	1.05614	1.08343	0.898631	1.3566	1.08177	1.02427	0.990549	0.860293	1.1343	0.896515	0.857792	0.804185	1.11814	1.25972	1.08787	1.09475	1.37392	1.42959	0.857138	0.995436	1.15229	0.945599	1.00028	1.00584	NA	NA	NA	NA	NA	NA	NA	NA	NA	NA	0.911049	1.01382	1.07267
P07333	CSF1R	Macrophage colony-stimulating factor 1 receptor OS=Homo sapiens OX=9606 GN=CSF1R PE=1 SV=2	NA	NA	NA	NA	NA	NA	NA	NA	NA	NA	NA	NA	NA	NA	NA	NA	NA	NA	NA	NA	NA	NA	NA	NA	0.82731	0.954687	0.951318	1.02576	0.88203	0.949145	0.978403	0.93271	0.879771	0.845514	1.00285	0.783986	1.02605	0.828573	1.038	1.16643	1.40085	1.17952	1.33016	1.01066	NA	NA	NA
P07339	CTSD	Cathepsin D OS=Homo sapiens OX=9606 GN=CTSD PE=1 SV=1	0.795647	1.00215	1.16022	1.10796	0.903502	0.933227	0.921273	1.28467	0.815694	0.983434	1.17862	1.1145	1.12272	1.14163	1.21125	1.25632	0.939914	1.15413	1.17202	1.24954	1.10849	1.12428	1.13895	1.20857	1.074	1.0421	1.02292	1.05959	0.876363	1.05227	1.06932	1.16619	0.977318	1.08734	1.06091	1.33302	1.86878	1.0025	1.20756	1.2911	1.27394	0.7285	1.173	0.862921	NA	NA	NA
P07357	C8A	Complement component C8 alpha chain OS=Homo sapiens OX=9606 GN=C8A PE=1 SV=2	0.931288	0.974274	1.26278	1.1897	1.13895	1.38992	1.22408	1.07467	0.930063	0.859995	1.06415	1.15869	0.939588	1.49942	1.35877	0.923382	1.19507	1.14464	1.03641	0.999861	1.35519	1.18042	1.64947	1.50525	1.0294	1.14576	1.07044	1.11628	0.985823	0.898319	1.26672	1.0511	1.16886	1.0568	0.966405	0.720715	1.19972	0.810397	0.976979	0.907016	0.975694	0.781165	0.922231	0.747995	1.06799	0.77148	1.04986
P07358	C8B	Complement component C8 beta chain OS=Homo sapiens OX=9606 GN=C8B PE=1 SV=3	0.836246	0.777492	1.10849	1.04153	1.10742	1.21841	1.11767	0.948421	0.845572	0.756703	0.959996	1.07863	0.830297	1.38453	1.22612	0.827023	1.16546	1.12148	0.983707	0.988902	1.31267	1.11891	1.45983	1.33719	1.06918	1.1483	1.09847	1.05826	0.905571	0.867539	1.07467	1.06474	1.0179	1.06496	0.871517	0.747114	1.14187	0.863579	0.976438	0.880808	0.962528	0.75205	0.884111	0.661769	0.841305	0.76165	0.92057
P07359	GP1BA	Platelet glycoprotein Ib alpha chain OS=Homo sapiens OX=9606 GN=GP1BA PE=1 SV=2	0.649094	0.732957	0.705345	0.755708	0.827425	0.821709	0.865557	0.978877	1.02754	0.959929	1.07155	0.950066	1.2804	1.19615	0.946976	0.886197	0.988217	1.17397	1.13218	1.0416	0.966874	0.94829	0.966941	1.00021	1.48308	1.19276	1.48113	0.977657	1.0398	1.11675	0.996195	1.04261	1.05125	1.43804	1.11566	1.24496	1.09558	1.26208	1.53273	1.38732	1.28476	1.2902	1.20748	1.41206	1.42011	1.09126	1.54339
P07360	C8G	Complement component C8 gamma chain OS=Homo sapiens OX=9606 GN=C8G PE=1 SV=3	0.767745	0.882581	1.17097	1.07512	1.04616	1.15589	1.13556	0.952176	0.799461	0.767958	0.882764	1.07773	0.986711	1.22366	1.20999	0.959597	1.22493	1.24462	1.07646	1.06703	1.3854	1.29262	1.49195	1.36434	1.06962	1.05629	1.07162	1.15926	0.952374	1.03118	1.14369	1.20689	1.0203	1.09384	0.572878	0.415696	0.696357	0.436151	0.528033	0.474441	0.510718	0.409235	0.518171	0.378011	0.739694	0.701736	0.800681
P07384	CAPN1	Calpain-1 catalytic subunit OS=Homo sapiens OX=9606 GN=CAPN1 PE=1 SV=1	NA	NA	NA	NA	NA	NA	NA	NA	NA	NA	NA	NA	NA	NA	NA	NA	1.35482	0.899316	1.03419	1.10642	1.06444	1.08915	1.21117	1.06821	1.1869	1.00919	0.933356	0.994332	1.10535	1.04109	1.06113	1.15373	1.09157	1.24816	0.827425	1.59317	0.995091	1.81026	1.26567	1.04109	0.946517	1.57494	1.30252	1.74038	0.616469	1.0568	0.767533
P07437	TUBB	Tubulin beta chain OS=Homo sapiens OX=9606 GN=TUBB PE=1 SV=2	1.25006	0.684442	1.35529	2.24871	1.1433	1.21445	0.852517	2.14013	1.27262	0.643227	0.779705	0.989588	0.721364	0.780408	0.468558	0.678537	1.193	0.838568	0.790206	0.802515	0.813492	0.959464	0.900751	0.92089	0.90175	1.42119	1.14322	1.03183	1.09225	1.03807	0.864238	0.791247	1.05731	1.18386	1.31795	1.98632	1.28815	1.99654	1.23893	1.76394	1.54896	2.54665	1.17251	2.5156	NA	NA	NA
P07477	PRSS1	Trypsin-1 OS=Homo sapiens OX=9606 GN=PRSS1 PE=1 SV=1	0.84218	0.797248	0.90903	1.0057	1.03147	1.02059	1.09825	0.863759	0.997162	0.99	1.00828	1.10719	1.07676	1.15173	1.04928	1.01811	1.13713	1.14385	1.13281	1.14631	1.18542	1.11736	1.06821	1.01087	1.07252	1.15189	1.11311	1.05753	1.09665	1.30667	1.25093	1.23559	1.2633	1.39484	1.66117	1.2079	1.45528	1.27447	1.43853	1.38934	1.45993	1.27996	1.21075	1.33691	1.24781	1.08802	1.12078
P07737	PFN1	Profilin-1 OS=Homo sapiens OX=9606 GN=PFN1 PE=1 SV=2	0.84218	0.452535	0.688152	0.914085	0.626593	0.552099	0.581278	0.601735	1.9545	0.787199	0.866697	1.07029	0.603698	0.832083	0.563817	0.489167	1.48031	0.626159	0.667019	0.858982	1.00396	1.30315	0.992542	1.21529	0.773622	1.02754	0.837174	0.603531	1.49765	0.686961	0.845748	1.22162	1.04935	0.76562	0.654289	1.59416	0.983911	1.9763	0.819207	1.2379	0.99206	1.65967	1.53858	1.98316	0.660394	1.00389	0.696357
P07738	BPGM	Bisphosphoglycerate mutase OS=Homo sapiens OX=9606 GN=BPGM PE=1 SV=2	0.960395	1.00354	1.28414	2.47787	1.09187	1.25884	1.03771	1.3903	0.869164	1.33007	0.98719	1.06747	1.03233	1.24824	1.16086	2.04401	0.651619	0.787908	0.635516	0.892423	0.966472	0.69467	0.76493	0.595181	1.21613	0.962394	0.933292	0.823934	0.778841	0.813323	0.932451	1.08787	0.651077	0.595346	NA	NA	NA	NA	NA	NA	NA	NA	NA	NA	NA	NA	NA
P07858	CTSB	Cathepsin B OS=Homo sapiens OX=9606 GN=CTSB PE=1 SV=3	0.892733	1.138	1.80063	1.3196	1.2698	1.14647	1.56623	1.68599	NA	NA	NA	NA	NA	NA	NA	NA	0.894529	0.906702	0.903502	0.989382	0.885215	0.908652	0.780462	0.866217	NA	NA	NA	NA	NA	NA	NA	NA	NA	NA	NA	NA	NA	NA	NA	NA	NA	NA	NA	NA	NA	NA	NA
P07900	HSP90AA1	Heat shock protein HSP 90-alpha OS=Homo sapiens OX=9606 GN=HSP90AA1 PE=1 SV=5	1.09293	0.893785	1.2115	1.44613	1.19168	1.3765	1.07445	2.20595	1.26839	1.06592	1.08373	1.27562	1.07781	1.05424	0.962661	1.25301	1.45367	1.00264	1.15525	0.914085	0.892794	0.850746	1.01579	0.85169	1.15885	1.02243	1.05336	0.822393	1.09089	0.878065	1.09119	0.84892	1.0697	0.914845	0.751581	1.21892	0.934004	1.36642	0.908652	0.910607	0.98214	1.40991	1.2578	1.38089	0.922423	1.11589	1.07766
P07910	HNRNPC	Heterogeneous nuclear ribonucleoproteins C1/C2 OS=Homo sapiens OX=9606 GN=HNRNPC PE=1 SV=4	0.601652	0.66725	0.835262	1.18378	1.01663	0.784965	0.893537	1.22714	1.18279	1.4149	0.987943	1.03154	1.09916	0.859459	0.78057	0.686342	NA	NA	NA	NA	NA	NA	NA	NA	NA	NA	NA	NA	NA	NA	NA	NA	NA	NA	NA	NA	NA	NA	NA	NA	NA	NA	NA	NA	NA	NA	NA
P07911	UMOD	Uromodulin OS=Homo sapiens OX=9606 GN=UMOD PE=1 SV=1	1.05599	1.48772	1.39252	1.31731	1.59129	1.19798	2.18147	1.75018	NA	NA	NA	NA	NA	NA	NA	NA	NA	NA	NA	NA	NA	NA	NA	NA	NA	NA	NA	NA	NA	NA	NA	NA	NA	NA	NA	NA	NA	NA	NA	NA	NA	NA	NA	NA	1.01108	0.787745	0.964464
P07942	LAMB1	Laminin subunit beta-1 OS=Homo sapiens OX=9606 GN=LAMB1 PE=1 SV=2	1.38166	1.30143	1.78931	1.59903	1.34071	1.60092	1.66879	1.53783	NA	NA	NA	NA	NA	NA	NA	NA	1.07111	1.13508	0.940435	0.830412	0.798077	0.796309	0.950593	0.827539	0.800016	0.939588	1.30206	1.30197	1.54168	1.07423	2.51647	3.18413	1.48452	1.05577	NA	NA	NA	NA	NA	NA	NA	NA	NA	NA	NA	NA	NA
P07988	SFTPB	Pulmonary surfactant-associated protein B OS=Homo sapiens OX=9606 GN=SFTPB PE=1 SV=3	1.00521	1.33071	1.5339	1.36775	1.22425	1.51603	1.34136	1.06128	NA	NA	NA	NA	NA	NA	NA	NA	0.94783	1.27633	1.5495	1.27421	1.61418	1.11837	1.32712	1.05205	NA	NA	NA	NA	NA	NA	NA	NA	NA	NA	NA	NA	NA	NA	NA	NA	NA	NA	NA	NA	NA	NA	NA
P07996	THBS1	Thrombospondin-1 OS=Homo sapiens OX=9606 GN=THBS1 PE=1 SV=2	1.39658	0.836304	0.770357	0.862861	0.682358	0.488388	0.542953	0.405339	1.45649	1.36983	0.974612	1.24842	0.824276	0.988834	0.676143	1.02484	1.94261	0.849744	0.88675	1.05863	1.48185	1.69608	1.18058	1.059	1.29801	0.7607	0.736726	0.884357	1.17683	0.758594	1.32602	1.81378	0.722666	0.926395	0.854706	1.35595	1.0108	1.58623	1.76945	2.34437	1.19119	1.62057	2.10891	1.96932	1.27332	1.31613	2.04954
P07998	RNASE1	Ribonuclease pancreatic OS=Homo sapiens OX=9606 GN=RNASE1 PE=1 SV=4	0.946189	0.972385	1.42227	1.55585	1.28565	1.19416	2.0511	2.18828	0.742571	0.731738	0.731536	0.720016	0.934068	0.990824	0.847215	0.863699	0.715439	0.761967	0.848979	0.866697	0.890508	0.88835	1.05314	1.0511	1.00125	1.04167	1.47836	1.17683	1.04239	0.910544	0.788127	0.859161	0.944878	1.01494	NA	NA	NA	NA	NA	NA	NA	NA	NA	NA	NA	NA	NA
P08185	SERPINA6	Corticosteroid-binding globulin OS=Homo sapiens OX=9606 GN=SERPINA6 PE=1 SV=1	0.699793	0.799129	0.907456	0.821994	0.885461	1.0299	0.900688	0.927616	0.890755	0.850156	0.914148	0.949342	0.988423	1.15101	1.11729	0.796916	0.90175	1.0148	0.774749	0.727793	0.858149	0.861367	0.966338	0.931805	1.2361	1.04543	0.970096	1.02619	0.895087	1.01494	1.16433	1.21849	1.25736	1.41167	1.36018	0.97786	1.46734	1.07214	1.20656	1.11419	1.3358	1.11088	1.17829	0.951978	1.18083	1.01368	1.30921
P08195	SLC3A2	4F2 cell-surface antigen heavy chain OS=Homo sapiens OX=9606 GN=SLC3A2 PE=1 SV=3	0.916496	1.02797	1.09445	0.987259	1.15397	1.11837	1.02484	1.03168	0.927295	0.964732	0.919104	1.08237	1.11837	1.25353	1.20047	1.12763	0.965802	1.04247	0.882825	0.943373	0.960329	0.941609	0.938416	0.962928	0.911996	1.01917	0.818469	0.858089	0.94632	0.961594	0.963262	0.909156	1.1125	0.966003	1.4838	1.37621	1.30903	1.16708	1.5213	1.4709	1.91361	1.63932	1.62001	1.24289	0.991579	0.781057	1.16748
P08238	HSP90AB1	Heat shock protein HSP 90-beta OS=Homo sapiens OX=9606 GN=HSP90AB1 PE=1 SV=4	0.698823	0.907268	0.72417	0.767958	0.752936	0.943438	0.780516	0.605165	1.2647	1.08598	1.04254	1.089	1.35802	1.17536	1.36226	1.07527	NA	NA	NA	NA	NA	NA	NA	NA	NA	NA	NA	NA	NA	NA	NA	NA	NA	NA	1.21335	1.19342	1.3931	1.23149	1.20389	1.17048	1.42949	1.34453	1.33367	1.33367	NA	NA	NA
P08253	MMP2	72 kDa type IV collagenase OS=Homo sapiens OX=9606 GN=MMP2 PE=1 SV=2	0.883744	0.739899	0.976505	0.95767	1.01776	1.14037	1.16191	1.23166	0.856248	1.05834	0.901188	1.12936	0.942131	1.08787	0.997024	1.0893	0.907016	0.908274	0.882275	0.972116	1.08065	1.54071	1.11891	1.77608	0.786381	0.905132	0.927809	0.859518	0.95145	0.89298	1.03054	0.964331	1.08854	0.969155	1.04775	1.16692	1.69326	1.38973	0.90532	1.51446	1.3705	1.55984	0.926845	1.17585	1.20455	1.24876	1.2683
P08294	SOD3	Extracellular superoxide dismutase [Cu-Zn] OS=Homo sapiens OX=9606 GN=SOD3 PE=1 SV=2	0.796033	1.34509	0.808489	1.5451	0.868261	0.947567	0.882153	0.911933	1.16465	1.28085	1.13453	0.834856	1.06113	1.03598	0.970433	0.970231	0.794324	0.829377	0.645684	0.618652	0.547299	0.701104	0.703928	0.845924	1.2647	0.929612	0.909345	1.06378	0.786326	0.878674	0.820628	1.08794	2.32302	2.52555	1.09028	1.20748	1.56092	1.2954	1.81416	1.46084	1.44844	1.08073	1.45387	0.801292	1.11752	1.28129	0.84405
P08514	ITGA2B	Integrin alpha-IIb OS=Homo sapiens OX=9606 GN=ITGA2B PE=1 SV=3	NA	NA	NA	NA	NA	NA	NA	NA	1.6465	0.919423	0.664804	0.861128	0.571094	0.635868	0.402371	0.383208	1.49195	0.684537	0.815524	0.872181	1.18239	1.29558	0.917958	1.02697	1.44073	1.92399	0.832256	0.761175	1.16983	0.856485	1.07081	0.793884	1.00591	0.818923	0.615572	1.96319	1.14425	2.40344	0.791357	1.46135	1.57669	2.3473	2.10118	2.5003	1.22002	2.21024	0.976776
P08519	LPA	Apolipoprotein(a) OS=Homo sapiens OX=9606 GN=LPA PE=1 SV=1	0.598615	0.678443	0.777546	0.946189	0.688964	0.715786	0.774641	0.703099	0.811802	0.895273	0.868682	0.916432	1.38175	1.89789	1.79826	1.14496	0.754033	1.06548	0.612465	0.584794	0.545859	0.4792	0.76732	0.676424	1.26015	1.0743	0.974409	1.63286	0.987532	1.11613	1.98825	2.60449	0.774749	0.807985	0.601985	0.49141	0.54783	0.405451	1.01466	1.25024	0.849862	0.777277	1.31012	0.81609	4.12273	0.600818	0.742107
P08567	PLEK	Pleckstrin OS=Homo sapiens OX=9606 GN=PLEK PE=1 SV=3	0.873512	0.768171	0.826737	1.12779	0.939002	0.842647	0.759225	0.790151	1.58359	0.917004	0.850982	1.01783	0.812928	0.880015	0.800459	0.951714	1.38665	0.719816	0.741028	0.912123	0.95033	1.3878	0.826737	1.34016	0.633932	0.907393	0.696599	0.387831	1.91255	0.546313	0.639227	0.750123	1.0141	0.669799	0.558566	2.13687	0.921209	3.11364	0.808993	1.51835	1.1708	2.58668	2.12402	3.55094	1.767	2.93671	1.8015
P08571	CD14	Monocyte differentiation antigen CD14 OS=Homo sapiens OX=9606 GN=CD14 PE=1 SV=2	0.914021	0.980983	1.24117	1.08877	1.17267	1.26208	1.25579	1.17308	0.990412	0.847156	1.05885	1.41069	0.978877	1.32079	1.40406	1.1125	1.30026	1.04218	1.1869	1.10634	1.2367	1.06128	1.13383	1.04884	1.04182	1.22044	0.995505	1.44113	0.854351	1.00278	1.29684	1.36405	1.50838	1.36746	1.57135	1.13682	1.91149	1.09308	1.21411	1.1902	1.48011	1.21782	1.02633	0.977386	1.37764	0.849391	0.839673
P08603	CFH	Complement factor H OS=Homo sapiens OX=9606 GN=CFH PE=1 SV=4	1.11636	1.18452	1.32143	1.08132	1.29531	1.36746	1.24669	1.06474	0.933745	0.913008	1.0242	1.09172	1.11582	1.32418	1.26505	1.03994	1.1479	1.27253	1.01277	0.989862	1.27527	1.28449	1.32583	1.32189	1.41529	1.28547	1.20999	1.34016	1.04052	1.10473	1.33182	1.3492	1.12701	1.12086	0.92646	0.714002	0.952374	0.701785	0.787253	0.719567	0.856248	0.703879	0.81124	0.677456	0.591356	0.581479	0.65697
P08637	FCGR3A	Low affinity immunoglobulin gamma Fc region receptor III-A OS=Homo sapiens OX=9606 GN=FCGR3A PE=1 SV=2	1.47724	1.4934	1.57702	1.38963	1.24332	1.42662	1.28672	1.18888	0.94632	1.03562	1.02314	1.03965	1.12031	1.1974	1.10842	1.07699	1.28147	1.42692	1.0808	1.11173	0.939458	0.919741	1.03426	0.875816	0.998961	0.876484	1.3154	1.14298	1.21976	1.81127	1.12623	1.06422	1.07438	1.04696	1.13761	0.805859	0.968685	0.831507	0.831334	0.946189	1.03886	0.769077	0.836073	0.781436	0.853167	0.929676	1.14552
P08670	VIM	Vimentin OS=Homo sapiens OX=9606 GN=VIM PE=1 SV=4	1.13532	0.925689	1.25719	2.33189	1.38857	1.76504	1.89605	2.02118	NA	NA	NA	NA	NA	NA	NA	NA	NA	NA	NA	NA	NA	NA	NA	NA	NA	NA	NA	NA	NA	NA	NA	NA	NA	NA	NA	NA	NA	NA	NA	NA	NA	NA	NA	NA	NA	NA	NA
P08697	SERPINF2	Alpha-2-antiplasmin OS=Homo sapiens OX=9606 GN=SERPINF2 PE=1 SV=3	0.936921	1.0225	1.19441	1.02307	0.939523	0.825878	0.967746	0.851336	0.913198	0.900564	0.943569	1.01635	0.884786	1.16409	1.22061	1.16409	1.06054	0.964866	0.897634	0.907456	0.957471	0.861905	0.950791	1.02165	1.2861	1.2844	0.846041	1.01487	0.900002	1.03433	1.22205	1.10366	1.18945	1.20631	1.1636	0.903377	1.33821	0.948421	1.08117	1.00049	1.1921	1.02854	1.07044	0.935883	1.28869	1.24427	1.29262
P08709	F7	Coagulation factor VII OS=Homo sapiens OX=9606 GN=F7 PE=1 SV=1	NA	NA	NA	NA	NA	NA	NA	NA	0.922487	0.976844	1.03886	1.09482	1.14703	1.41225	1.36964	1.25867	0.979964	1.15181	0.978606	1.06762	1.1778	1.1591	1.17674	1.04616	1.0546	1.26681	1.09596	1.08515	0.988012	1.14029	1.14235	1.1207	1.32712	1.26077	1.43396	1.22603	1.12482	0.763341	0.997024	0.845455	1.13257	0.788127	1.50598	0.923574	1.01769	1.18723	0.966941
P08758	ANXA5	Annexin A5 OS=Homo sapiens OX=9606 GN=ANXA5 PE=1 SV=2	NA	NA	NA	NA	NA	NA	NA	NA	1.59494	0.902563	1.06275	1.03111	0.862921	0.999446	0.814677	0.776038	1.31814	1.09429	0.971375	0.952572	1.08741	1.06025	1.02997	1.01551	1.37268	1.36765	1.18863	1.17414	1.52446	1.75042	1.46125	1.69737	1.98894	NA	0.918276	1.55639	1.2466	1.58096	1.29262	1.34062	1.14902	1.64741	1.32666	1.50504	0.977183	1.60036	1.4708
P08833	IGFBP1	Insulin-like growth factor-binding protein 1 OS=Homo sapiens OX=9606 GN=IGFBP1 PE=1 SV=1	1.01354	1.24556	1.34537	1.19334	1.44995	1.28005	1.61384	1.628	NA	NA	NA	NA	NA	NA	NA	NA	NA	NA	NA	NA	NA	NA	NA	NA	NA	NA	NA	NA	NA	NA	NA	NA	NA	NA	0.966606	0.789384	1.19541	0.823648	0.777169	0.591602	1.21605	1.27863	0.60036	0.531116	1.18427	0.620843	0.951714
P09110	ACAA1	3-ketoacyl-CoA thiolase, peroxisomal OS=Homo sapiens OX=9606 GN=ACAA1 PE=1 SV=2	NA	NA	NA	NA	NA	NA	NA	NA	0.83243	0.760173	0.823077	0.976438	1.22264	1.11095	1.41314	1.25484	1.31622	1.16619	1.52944	1.31285	1.02038	1.03828	1.12779	0.913072	1.08478	1.01811	1.072	1.01748	0.843582	1.12054	1.2131	1.27262	1.26628	1.41441	NA	NA	NA	NA	NA	NA	NA	NA	NA	NA	NA	NA	NA
P09172	DBH	Dopamine beta-hydroxylase OS=Homo sapiens OX=9606 GN=DBH PE=1 SV=3	1.22315	0.935818	0.954952	1.12039	0.793664	0.696261	0.737799	0.754242	0.893352	0.978403	0.845983	0.981527	0.892856	0.97637	0.824905	1.04848	0.80257	0.809611	0.785836	0.960661	1.04182	1.24747	1.08802	1.2758	0.627071	0.607855	0.950923	0.813774	1.17642	1.14774	0.979081	0.878187	1.44433	1.59074	0.960395	0.611871	1.05088	0.703343	1.66567	1.5826	1.63785	1.33053	1.00368	0.832833	0.976912	0.878126	1.06636
P09211	GSTP1	Glutathione S-transferase P OS=Homo sapiens OX=9606 GN=GSTP1 PE=1 SV=2	NA	NA	NA	NA	NA	NA	NA	NA	1.12163	1.15109	0.804185	0.985754	0.869043	0.742262	0.936532	1.03168	0.986028	0.916877	0.781599	1.07363	1.02222	0.927809	0.997992	0.952176	0.550876	0.80653	0.893661	0.721865	1.15725	0.744065	0.876788	0.820457	0.842296	0.623214	0.892733	1.42939	0.778787	1.3807	0.918467	1.09021	0.929483	1.40903	1.0362	1.49506	1.085	1.49547	1.03333
P09382	LGALS1	Galectin-1 OS=Homo sapiens OX=9606 GN=LGALS1 PE=1 SV=2	0.82023	0.78922	1.54928	1.85305	0.928259	1.12295	1.25102	1.53869	1.1145	1.00954	0.993643	1.73159	0.972318	1.00222	1.01031	0.993643	0.976912	0.964197	1.14536	1.00514	1.14068	1.09498	1.38099	1.33793	0.923574	0.862981	1.48968	1.02342	0.865197	0.875998	0.820798	0.863699	0.9015	0.818412	0.807593	1.07482	0.755341	0.882887	0.672031	0.643896	0.636839	0.843699	0.746855	0.910165	NA	NA	NA
P09467	FBP1	Fructose-1,6-bisphosphatase 1 OS=Homo sapiens OX=9606 GN=FBP1 PE=1 SV=5	1.12031	1.06467	1.36339	1.07863	1.45801	0.931934	1.35004	1.60781	1.11435	1.02094	1.57757	1.78968	1.64867	1.12459	1.41196	1.36169	1.5251	1.06673	1.73881	1.23876	1.06201	1.20172	1.30649	1.14314	1.2963	0.989245	1.0793	1.15942	1.07564	1.05797	1.61049	1.27024	1.25388	0.828056	NA	NA	NA	NA	NA	NA	NA	NA	NA	NA	NA	NA	NA
P09486	SPARC	SPARC OS=Homo sapiens OX=9606 GN=SPARC PE=1 SV=1	NA	NA	NA	NA	NA	NA	NA	NA	1.19731	1.14314	0.864058	1.15445	0.790589	1.09498	0.745355	0.927809	1.26251	0.663883	0.741131	0.864298	1.13186	1.37468	0.982957	0.941152	0.996264	1.08095	0.792674	0.804185	1.25084	1.01833	1.49412	1.54371	1.01094	1.0041	1.1657	1.42751	1.42711	1.51708	1.6733	1.68705	1.31522	1.52986	1.93536	1.66267	1.21883	1.46439	1.52457
P09493	TPM1	Tropomyosin alpha-1 chain OS=Homo sapiens OX=9606 GN=TPM1 PE=1 SV=2	NA	NA	NA	NA	NA	NA	NA	NA	NA	NA	NA	NA	NA	NA	NA	NA	1.34733	1.36794	1.08493	0.946451	1.19681	1.11814	1.01066	1.0746	1.7537	1.01924	1.12272	1.49061	1.35032	1.50129	0.939979	1.49994	1.02833	1.2861	NA	NA	NA	NA	NA	NA	NA	NA	NA	NA	0.26272	0.439916	0.251879
P09601	HMOX1	Heme oxygenase 1 OS=Homo sapiens OX=9606 GN=HMOX1 PE=1 SV=1	0.687151	0.756599	0.788455	2.02385	1.14377	1.2013	1.02165	3.79053	NA	NA	NA	NA	NA	NA	NA	NA	NA	NA	NA	NA	NA	NA	NA	NA	NA	NA	NA	NA	NA	NA	NA	NA	NA	NA	NA	NA	NA	NA	NA	NA	NA	NA	NA	NA	NA	NA	NA
P09871	C1S	Complement C1s subcomponent OS=Homo sapiens OX=9606 GN=C1S PE=1 SV=1	1.08343	0.755865	1.337	1.19259	1.2355	1.35463	1.40513	0.999169	1.04044	0.993024	0.869104	1.29137	0.884234	1.50483	0.930256	1.14361	1.09232	1.04892	1.00549	1.21167	1.24134	1.26007	1.56374	1.32125	0.818072	1.32061	1.20022	0.864417	1.0421	0.826794	1.19756	0.88307	1.26146	0.918149	0.806642	0.900751	1.22256	0.789549	0.610262	0.891063	0.996264	0.967947	1.085	0.958599	0.94037	0.74582	0.87691
P09960	LTA4H	Leukotriene A-4 hydrolase OS=Homo sapiens OX=9606 GN=LTA4H PE=1 SV=2	1.21209	1.00961	1.24177	1.32372	1.56939	2.09333	1.14806	1.18222	1.15902	0.928967	1.07438	1.38655	0.902939	1.25998	1.09931	0.953629	1.11736	1.14029	0.897759	0.893166	0.950132	0.788346	1.05511	0.792784	0.740309	0.793884	1.22459	0.81214	0.797524	0.79048	1.0225	0.793884	0.880076	0.822792	0.869887	0.635428	1.15741	0.84078	0.835609	0.900751	0.840605	0.784312	0.962995	0.821937	1.33867	0.543631	0.767905
P09972	ALDOC	Fructose-bisphosphate aldolase C OS=Homo sapiens OX=9606 GN=ALDOC PE=1 SV=2	0.977183	0.886013	1.02278	1.06829	1.05863	1.07348	1.0252	3.59826	NA	NA	NA	NA	NA	NA	NA	NA	0.967612	1.15918	1.04558	1.21714	0.828917	1.83706	1.56211	1.07661	1.07066	1.18789	0.900626	1.0073	1.05907	1.12008	1.21403	1.29936	1.16643	1.04493	NA	NA	NA	NA	NA	NA	NA	NA	NA	NA	NA	NA	NA
P0C0L4	C4A	Complement C4-A OS=Homo sapiens OX=9606 GN=C4A PE=1 SV=2	0.943569	0.787472	0.87043	0.667389	0.793664	0.67301	0.645639	0.478304	1.02314	0.806362	0.806698	0.909156	1.31258	1.5732	1.37783	0.685059	0.479466	0.819434	0.753824	0.776146	0.889521	0.906199	1.24444	1.30967	0.948684	0.816769	1.1902	1.32924	0.927873	0.914845	0.607645	1.10053	0.984935	0.928002	1.39484	0.932257	1.42405	0.882887	1.1491	0.840139	1.40104	0.84329	1.36869	0.792839	1.67296	1.04906	1.47908
P0C0L5	C4B	Complement C4-B OS=Homo sapiens OX=9606 GN=C4B PE=1 SV=2	1.22961	1.07162	1.07021	1.005	0.958599	0.824276	0.812928	0.751685	1.22442	1.10734	0.928903	1.15541	1.45498	1.77756	1.69784	1.08998	0.746389	0.841188	0.788236	0.858804	0.930256	0.98432	1.27686	1.24729	0.893785	0.906388	1.33487	1.42593	1.08892	0.926781	0.868622	0.740155	1.06378	0.808657	0.976709	0.611193	1.64091	0.955614	1.25449	0.960595	1.65508	0.886873	1.47151	0.737492	1.79838	1.23405	1.59638
P0C7W6	CCDC172	Coiled-coil domain-containing protein 172 OS=Homo sapiens OX=9606 GN=CCDC172 PE=1 SV=1	0.682263	0.756913	0.868381	0.725627	0.801459	0.733821	0.678772	0.777654	0.682831	0.650806	0.868441	1.00305	0.736573	0.749084	0.809667	0.278355	1.55175	1.85472	1.16207	0.867539	1.22731	0.558644	1.36415	0.726785	1.12249	0.705345	0.597868	0.686009	0.763765	0.569394	0.698678	0.5269	0.582488	0.498754	NA	NA	NA	NA	NA	NA	NA	NA	NA	NA	0.0700049	0.139806	0.0655209
P0CF74	IGLC6	Immunoglobulin lambda constant 6 OS=Homo sapiens OX=9606 GN=IGLC6 PE=1 SV=1	0.724572	1.16111	1.36898	1.04921	0.744684	0.778463	0.746493	1.1369	0.772282	1.64035	0.896205	0.867839	1.08245	0.992886	0.849449	0.753459	0.84998	1.53092	2.86235	3.21451	1.8221	0.944485	1.85549	1.82361	NA	NA	NA	NA	NA	NA	NA	NA	NA	NA	NA	NA	NA	NA	NA	NA	NA	NA	NA	NA	NA	NA	NA
P0DJI8	SAA1	Serum amyloid A-1 protein OS=Homo sapiens OX=9606 GN=SAA1 PE=1 SV=1	0.652658	1.22179	1.68249	0.931095	1.2773	1.08764	1.35707	1.26857	1.05812	0.811746	1.38233	1.58755	1.66786	1.131	1.72764	1.14552	1.29477	1.55401	1.24272	0.912249	1.1874	0.633449	1.83643	0.681507	0.509304	0.508246	1.54628	1.00898	0.571371	0.512278	0.937766	0.837871	0.608446	0.515056	0.412481	0.311758	0.443467	0.323223	0.416734	0.337626	0.607182	0.550227	1.18083	0.277546	1.62822	0.375816	0.743395
P0DJI9	SAA2	Serum amyloid A-2 protein OS=Homo sapiens OX=9606 GN=SAA2 PE=1 SV=1	0.572799	1.00417	1.45055	0.646221	1.02733	0.831564	1.0946	0.806474	1.05944	0.714101	1.48823	1.72548	1.2023	0.83318	1.38655	0.788673	1.93912	2.27505	1.62383	1.13045	1.73448	0.62037	4.9021	0.633976	0.37211	0.361985	1.76626	0.945075	0.451313	0.358265	0.749032	0.575664	0.379613	0.30397	0.774104	0.163006	0.681318	0.0853834	0.348106	0.13039	0.242726	0.115535	0.268129	0.083233	1.81026	0.21976	0.482099
P0DMV8	HSPA1A	Heat shock 70 kDa protein 1A OS=Homo sapiens OX=9606 GN=HSPA1A PE=1 SV=1	1.32106	1.02498	1.43983	1.30595	1.03397	1.24057	1.24574	1.44704	1.07908	0.968081	1.0826	1.32235	1.02505	1.14743	1.61597	1.38501	1.15926	0.972251	1.0743	1.0984	0.971712	1.04775	1.09665	0.990617	1.63501	1.50932	1.30089	1.65956	1.60036	1.34667	1.38147	1.91004	1.67041	1.57571	2.41061	2.21514	1.31103	1.67586	1.38348	1.34621	1.11868	1.87332	1.78052	1.70173	2.03792	1.16635	2.4765
P0DOX2		Immunoglobulin alpha-2 heavy chain OS=Homo sapiens OX=9606 PE=1 SV=2	0.862323	1.08448	1.15125	0.850687	0.84364	0.912882	0.952572	0.8743	0.872121	0.910039	0.849037	0.875634	1.08945	1.17202	1.13461	1.05081	0.859042	0.939848	0.79924	0.776523	1.01487	1.09498	1.05438	0.902939	1.045	1.00076	0.805971	0.99048	0.97279	1.06747	1.03526	0.910986	0.963997	0.939783	1.40162	1.08463	1.02236	0.853167	1.03792	1.01579	1.23072	0.988423	1.05424	1.06452	1.15982	0.660761	1.20089
P0DOX3		Immunoglobulin delta heavy chain OS=Homo sapiens OX=9606 PE=1 SV=1	0.559147	0.742725	0.776846	0.812985	1.05746	1.25119	1.52393	2.04613	0.775447	0.724471	0.704514	1.05621	2.2974	3.09792	2.59009	1.71499	0.442148	0.51527	0.489439	0.524059	0.593615	0.703197	0.575984	0.617452	1.0009	1.14005	0.998961	1.08968	1.61933	1.39223	0.939848	0.962061	0.783932	0.700618	2.32705	1.7825	0.655106	0.577343	0.504386	0.499931	0.708775	0.588168	0.322372	0.379613	0.39741	0.438364	0.850982
P0DOX4		Immunoglobulin epsilon heavy chain OS=Homo sapiens OX=9606 PE=1 SV=1	0.6952	0.94573	0.855061	0.805692	0.808713	0.776361	0.725577	1.07088	0.889274	1.20556	0.917258	0.835783	1.41883	1.42692	1.31786	1.47345	1.04239	1.19615	1.05937	1.11636	0.756494	1.34071	1.46044	1.24427	0.659708	0.759383	0.788673	1.39416	0.821083	1.24005	0.656788	0.630645	0.903878	0.942393	0.881053	0.71837	1.83185	1.54339	1.16296	1.22536	0.718271	0.715935	1.06629	0.973937	0.848038	0.726936	0.755603
P0DOX5		Immunoglobulin gamma-1 heavy chain OS=Homo sapiens OX=9606 PE=1 SV=2	1.16675	1.46958	1.34313	1.11373	1.2894	1.46978	1.08147	1.49921	1.15237	1.49216	1.19715	1.0587	1.31987	1.23782	1.18797	0.994815	1.06245	1.24332	1.51183	1.36926	1.31048	1.02215	1.01748	0.865497	0.92601	0.936986	1.24453	1.44253	1.14187	1.5132	1.1649	0.994194	1.06681	1.0172	0.893599	0.698969	0.779759	0.639803	0.696985	0.689298	0.828343	0.674364	0.703733	0.615231	0.814677	0.677456	0.568527
P0DOX6		Immunoglobulin mu heavy chain OS=Homo sapiens OX=9606 PE=1 SV=2	0.412596	0.726029	0.548742	0.450781	0.677738	0.693035	0.697082	0.60462	0.528472	0.666418	0.575625	0.63446	0.837813	0.913325	0.888535	0.873815	0.601568	1.60281	0.63874	0.68179	0.507402	0.515198	0.576303	0.527777	0.883928	1.14155	0.865137	0.961194	0.871637	1.01572	1.25128	1.16215	0.994263	1.01953	1.04536	0.989451	1.78485	2.25027	1.09802	1.18715	1.19516	1.28351	1.80538	2.56436	1.15077	0.779975	0.847979
P0DOX7		Immunoglobulin kappa light chain OS=Homo sapiens OX=9606 PE=1 SV=1	1.01896	1.24134	0.959331	0.751581	1.16014	1.29585	1.02868	1.32767	1.14266	1.48545	1.14496	0.970029	1.29083	1.14496	1.04088	0.923638	0.919996	1.0817	1.33071	1.22603	1.15085	0.981527	1.07111	0.91834	0.973532	0.961994	1.07326	1.41834	1.14314	1.50337	0.900626	0.873633	0.923446	0.873452	0.678961	0.595924	0.630864	0.531264	0.632045	0.614251	0.799018	0.681743	0.739591	0.646804	0.786326	0.576303	0.637545
P0DOX8		Immunoglobulin lambda-1 light chain OS=Homo sapiens OX=9606 PE=1 SV=1	0.954356	1.23225	1.06209	0.851277	1.19565	1.20564	1.00445	1.23379	0.976099	1.24729	0.964264	1.01122	1.09278	1.05234	0.930901	0.810734	0.73032	0.866037	1.00933	0.968954	1.16562	0.768438	0.899191	0.768704	1.0671	1.00968	1.50525	1.32216	1.12358	1.34546	1.13304	0.979964	0.908463	0.866397	1.11829	0.98719	0.856485	0.715836	1.05966	1.02576	1.07557	0.866938	0.680233	0.60395	1.37592	0.67329	0.86808
P0DOY3	IGLC3	Immunoglobulin lambda constant 3 OS=Homo sapiens OX=9606 GN=IGLC3 PE=1 SV=1	0.954158	1.23431	1.30967	1.08741	0.99103	1.06452	0.903377	1.06282	0.92492	1.22637	0.986301	0.87618	1.27651	1.23354	1.10796	0.978199	0.815864	0.964999	1.11435	1.03204	1.15565	0.842063	0.928452	0.7803	0.765885	0.744219	0.981867	1.05074	0.972385	1.25623	0.957603	0.772711	0.808993	0.747425	1.30468	0.996609	1.12818	0.932904	0.917894	0.890076	0.948027	0.773997	1.01326	0.932128	1.24324	0.719068	0.892609
P0DP01	IGHV1-8	Immunoglobulin heavy variable 1-8 OS=Homo sapiens OX=9606 GN=IGHV1-8 PE=3 SV=1	1.1974	1.56082	1.25206	0.991442	1.00153	0.953365	0.799683	1.04109	1.05658	1.12397	1.12405	1.53273	1.19061	1.60414	2.13007	2.08696	0.804576	1.15221	1.15701	1.16409	1.23979	1.72166	0.777384	0.774104	0.987532	1.60247	0.730522	1.26514	0.879527	1.12	1.10819	1.49247	1.05015	1.19715	NA	0.130534	0.475264	0.719816	0.156366	0.360307	0.864178	1.23046	0.606761	0.766682	0.974612	0.936078	0.698727
P0DP02	IGHV3-30-3	Immunoglobulin heavy variable 3-30-3 OS=Homo sapiens OX=9606 GN=IGHV3-30-3 PE=3 SV=1	0.851749	1.07148	0.975085	0.734584	1.0237	1.49257	1.11528	0.880259	0.916877	1.16805	1.00668	0.990617	1.33821	1.37907	1.27642	1.05322	0.89695	1.15245	1.27315	1.14894	1.09832	0.972116	1.09916	0.856485	0.838684	0.85299	0.962728	1.17089	0.920698	1.15461	1.00668	0.87843	0.899067	0.844986	0.988902	0.840955	0.930901	1.00786	0.914972	0.857376	1.28583	1.06489	1.14385	1.11018	1.51194	0.800016	1.22987
P0DP03	IGHV3-30-5	Immunoglobulin heavy variable 3-30-5 OS=Homo sapiens OX=9606 GN=IGHV3-30-5 PE=3 SV=1	1.11273	1.40279	1.16046	0.835957	1.44353	1.92946	1.43575	1.55639	0.856248	1.12709	0.951648	0.976776	1.36898	1.40922	1.37031	1.17789	1.24479	1.62428	1.70385	1.58041	1.54328	1.42899	1.61754	1.2886	0.952308	0.95482	1.28869	1.29882	1.10152	1.37726	1.22306	1.09058	1.16772	1.11907	0.331803	0.320701	0.197387	0.183392	0.291042	0.28383	0.277181	0.230862	0.200629	0.200504	0.34496	0.213973	0.233032
P0DP04	IGHV3-43D	Immunoglobulin heavy variable 3-43D OS=Homo sapiens OX=9606 GN=IGHV3-43D PE=3 SV=1	0.937961	0.971442	0.91048	0.640558	0.996333	1.04863	1.11011	0.663055	1.13367	1.4649	1.20164	1.02045	1.50525	1.42514	1.24695	1.08704	0.977183	0.969895	1.25823	1.15245	1.02449	0.641757	1.18214	0.934004	0.852576	0.80933	0.88093	1.1303	1.16417	1.44513	0.74815	0.79218	0.822108	0.753876	0.901875	0.855358	0.735247	0.848155	0.974409	0.773246	0.751372	0.633361	1.17292	1.24859	1.75942	0.702758	1.16951
P0DP09	IGKV1-13	Immunoglobulin kappa variable 1-13 OS=Homo sapiens OX=9606 GN=IGKV1-13 PE=3 SV=1	0.774963	1.04435	1.00278	0.965401	0.85922	0.720165	0.764453	1.02776	0.629597	0.988765	0.766788	0.6825	0.797745	0.78453	0.818923	0.609712	0.620284	0.676799	1.19185	1.1016	0.764506	0.771105	0.515484	0.484208	0.797414	1.02726	2.56028	3.882	0.960928	1.01953	1.04008	1.02066	0.867358	0.958334	1.00278	0.977657	0.510046	0.37501	0.245841	0.349049	0.437969	NA	0.361308	0.373324	1.07036	0.330289	0.403125
P0DP25	CALM3	Calmodulin-3 OS=Homo sapiens OX=9606 GN=CALM3 PE=1 SV=1	0.893971	0.927166	1.12498	1.24057	0.614975	0.586336	0.524168	1.09855	1.52172	0.835725	1.43565	0.924343	1.20556	0.747736	0.81006	0.720665	1.17658	0.837406	0.711877	0.592218	0.770144	0.874118	0.569789	0.740925	1.49154	0.983638	0.83671	1.16167	1.24444	1.14385	0.706617	1.26181	0.891063	1.63342	0.790206	1.98041	1.12936	2.47547	2.07383	1.3905	1.19358	2.26891	1.53581	2.44528	1.16199	1.53954	1.11597
P0DSN7	IGKV1D-37	Probable non-functional immunoglobulinn kappa variable 1D-37 OS=Homo sapiens OX=9606 GN=IGKV1D-37 PE=5 SV=1	0.942915	1.1193	0.848331	0.63812	1.34854	1.14544	0.902876	0.953695	1.08817	1.12983	1.09946	1.0887	1.30677	1.24083	1.19931	0.847039	0.989588	1.01326	1.20472	1.0587	1.07244	0.909219	0.941674	0.775823	0.837871	0.683588	1.00271	1.28628	0.855832	0.940761	0.696261	0.73826	0.564991	0.711236	1.19781	1.00598	1.06047	0.712865	1.03857	0.884295	1.04964	0.858387	0.831276	0.762337	0.846687	1.31076	0.583458
P10124	SRGN	Serglycin OS=Homo sapiens OX=9606 GN=SRGN PE=1 SV=3	NA	NA	NA	NA	NA	NA	NA	NA	1.18822	1.12904	1.173	0.969021	0.989657	0.988491	1.06784	0.923382	1.69396	1.01213	0.877335	0.767426	1.34565	1.14854	1.08613	0.802737	NA	NA	NA	NA	NA	NA	NA	NA	NA	NA	1.13903	0.962328	1.21926	1.28263	2.22777	1.2743	1.34294	0.982957	2.16625	1.21799	1.3463	1.02562	2.22022
P10321	HLA-C	HLA class I histocompatibility antigen, C alpha chain OS=Homo sapiens OX=9606 GN=HLA-C PE=1 SV=3	1.22995	1.18239	1.27306	1.62834	0.924856	0.841596	0.823648	0.893414	NA	NA	NA	NA	NA	NA	NA	NA	1.01826	1.04348	0.834972	1.04892	1.22697	1.11219	1.19607	1.00021	NA	NA	NA	NA	NA	NA	NA	NA	NA	NA	NA	NA	NA	NA	NA	NA	NA	NA	NA	NA	NA	NA	NA
P10412	H1-4	Histone H1.4 OS=Homo sapiens OX=9606 GN=H1-4 PE=1 SV=2	0.775017	0.938416	1.07051	1.73183	0.858446	0.731536	0.701833	0.89695	NA	NA	NA	NA	NA	NA	NA	NA	NA	NA	NA	NA	NA	NA	NA	NA	NA	NA	NA	NA	NA	NA	NA	NA	NA	NA	0.672078	1.2578	0.479865	1.39368	0.620112	0.606467	0.471817	1.41716	1.0115	4.80921	0.841654	2.11521	0.497132
P10451	SPP1	Osteopontin OS=Homo sapiens OX=9606 GN=SPP1 PE=1 SV=1	0.689059	1.01298	1.08095	1.10535	0.825992	0.987669	1.72716	1.89987	0.697372	1.14735	1.02257	1.39736	1.23773	1.54928	1.53464	1.29882	0.79218	0.721814	1.01368	0.869224	0.813943	0.95	0.956409	0.582044	0.765673	0.938481	1.44333	1.16393	1.03047	0.95244	2.04202	1.16199	1.20322	1.0094	NA	NA	NA	NA	NA	NA	NA	NA	NA	NA	NA	NA	NA
P10586	PTPRF	Receptor-type tyrosine-protein phosphatase F OS=Homo sapiens OX=9606 GN=PTPRF PE=1 SV=2	1.35304	0.652161	0.747425	1.10221	1.16797	1.17985	0.907582	0.843173	0.887365	1.33376	1.10934	1.22629	1.11003	1.27121	0.931999	0.997024	1.77682	0.457645	0.531006	0.970769	1.6888	1.50274	2.2107	1.92186	1.12701	1.24565	1.18222	1.03706	1.18222	1.02762	1.25545	1.15701	1.54146	1.21319	1.43316	1.0309	1.51509	1.37955	1.2308	1.16046	2.25777	1.51005	1.44513	0.950396	0.780083	0.796143	0.956409
P10643	C7	Complement component C7 OS=Homo sapiens OX=9606 GN=C7 PE=1 SV=2	0.954753	0.95033	1.07684	1.04768	1.13516	1.11589	0.969088	0.793114	0.741285	0.825019	0.775877	0.807089	0.861606	0.964866	0.877274	1.10995	1.10611	1.19309	1.13084	1.26901	1.47161	1.38953	1.35444	1.3383	1.01663	1.02769	1.20899	1.0799	0.942458	1.039	1.23971	1.28191	1.20623	1.28672	0.883621	0.760911	0.754608	0.612678	0.751529	0.773782	0.816203	0.778409	0.542728	0.489032	0.710152	0.761492	0.882458
P10645	CHGA	Chromogranin-A OS=Homo sapiens OX=9606 GN=CHGA PE=1 SV=7	0.753354	0.851985	2.88226	2.3669	1.17854	1.01115	1.75991	1.58513	0.541675	0.776953	0.703002	1.34062	1.06821	1.2605	1.01143	1.25684	1.13226	1.2008	1.2524	1.74303	1.45902	1.232	0.806921	1.27033	NA	NA	NA	NA	NA	NA	NA	NA	NA	NA	NA	NA	NA	NA	NA	NA	NA	NA	NA	NA	NA	NA	NA
P10646	TFPI	Tissue factor pathway inhibitor OS=Homo sapiens OX=9606 GN=TFPI PE=1 SV=1	1.19135	1.01677	1.46277	1.91946	1.03692	1.19831	1.41647	1.00236	NA	NA	NA	NA	NA	NA	NA	NA	2.34486	1.84869	2.12138	1.98123	1.91057	2.61335	2.22407	1.62834	NA	NA	NA	NA	NA	NA	NA	NA	NA	NA	NA	NA	NA	NA	NA	NA	NA	NA	NA	NA	NA	NA	NA
P10768	ESD	S-formylglutathione hydrolase OS=Homo sapiens OX=9606 GN=ESD PE=1 SV=2	0.80491	0.720365	0.97976	1.11157	0.989039	1.01776	0.812534	1.06312	NA	NA	NA	NA	NA	NA	NA	NA	NA	NA	NA	NA	NA	NA	NA	NA	0.937311	1.06511	1.03061	0.824333	1.39629	0.991717	1.02236	1.07617	1.12303	1.00877	NA	NA	NA	NA	NA	NA	NA	NA	NA	NA	1.25353	1.54885	1.25841
P10909	CLU	Clusterin OS=Homo sapiens OX=9606 GN=CLU PE=1 SV=1	0.850333	0.652794	0.846863	1.05585	0.937051	0.817902	0.828975	0.641224	0.808881	0.932516	0.719467	0.869104	0.748929	0.998199	0.660166	0.950659	0.811521	0.873997	0.76716	1.13037	0.905508	1.06585	0.866637	1.2492	0.863399	1.17511	1.1118	0.751737	1.07564	0.930643	1.13753	0.827597	1.26094	0.90966	0.944027	1.13934	1.26444	1.12475	0.910859	1.30107	1.04044	1.20731	1.20614	1.07393	1.09293	1.17137	1.224
P11021	HSPA5	Endoplasmic reticulum chaperone BiP OS=Homo sapiens OX=9606 GN=HSPA5 PE=1 SV=2	1.15645	0.711039	1.0479	1.61911	1.008	1.15029	1.18591	1.14942	1.18954	1.03147	0.89807	1.08696	0.858863	1.07602	0.808993	0.989039	1.04435	0.722966	0.888596	0.994332	0.883866	0.980575	1.04218	1.00891	0.911112	1.02534	1.1135	0.742673	0.998822	0.739899	1.20991	0.978267	1.0479	0.871698	0.88148	1.25649	1.07304	1.43157	0.942719	1.23988	1.0746	1.40873	1.32198	1.35604	1.30894	1.3164	1.31969
P11047	LAMC1	Laminin subunit gamma-1 OS=Homo sapiens OX=9606 GN=LAMC1 PE=1 SV=3	1.77227	1.5632	2.44376	2.51909	2.211	3.06312	3.22903	2.28248	NA	NA	NA	NA	NA	NA	NA	NA	1.62113	1.2308	2.51664	3.02325	1.56114	2.84159	3.48921	1.90303	NA	NA	NA	NA	NA	NA	NA	NA	NA	NA	NA	NA	NA	NA	NA	NA	NA	NA	NA	NA	NA	NA	NA
P11142	HSPA8	Heat shock cognate 71 kDa protein OS=Homo sapiens OX=9606 GN=HSPA8 PE=1 SV=1	1.14711	0.670078	1.0309	2.36117	0.946189	1.07542	0.882214	1.3251	1.68203	0.842355	0.78453	1.04957	0.669845	0.771105	0.629335	0.858446	1.13579	0.89888	0.892918	1.0094	0.99516	1.12008	1.1118	1.14353	0.804241	0.929032	1.02961	0.80491	1.28076	0.768065	1.04522	1.5436	1.07945	0.92524	0.585605	1.78324	0.91206	1.9312	0.673944	1.02712	0.960129	2.0416	1.39658	2.00875	1.0829	1.93361	1.23911
P11166	SLC2A1	Solute carrier family 2, facilitated glucose transporter member 1 OS=Homo sapiens OX=9606 GN=SLC2A1 PE=1 SV=2	NA	NA	NA	NA	NA	NA	NA	NA	NA	NA	NA	NA	NA	NA	NA	NA	NA	NA	NA	NA	NA	NA	NA	NA	NA	NA	NA	NA	NA	NA	NA	NA	NA	NA	NA	NA	NA	NA	NA	NA	NA	NA	NA	NA	1.99945	0.712618	1.63354
P11226	MBL2	Mannose-binding protein C OS=Homo sapiens OX=9606 GN=MBL2 PE=1 SV=2	0.514342	0.570619	0.708677	0.836826	1.6929	1.7735	1.51089	1.10596	0.666603	0.673337	0.550571	0.847861	0.973127	1.76786	0.931805	1.16159	1.00793	0.82188	0.805078	1.02363	1.71511	1.94046	1.72477	1.51477	0.90903	1.08666	1.33478	0.812647	0.649815	0.569158	0.777007	0.831795	1.76125	0.963195	1.01882	1.07296	0.87904	0.647252	0.949474	0.961394	0.760489	0.792619	0.498719	0.341013	1.86051	2.45666	1.44493
P11234	RALB	Ras-related protein Ral-B OS=Homo sapiens OX=9606 GN=RALB PE=1 SV=1	NA	NA	NA	NA	NA	NA	NA	NA	NA	NA	NA	NA	NA	NA	NA	NA	NA	NA	NA	NA	NA	NA	NA	NA	NA	NA	NA	NA	NA	NA	NA	NA	NA	NA	NA	NA	NA	NA	NA	NA	NA	NA	NA	NA	NA	NA	NA
P11279	LAMP1	Lysosome-associated membrane glycoprotein 1 OS=Homo sapiens OX=9606 GN=LAMP1 PE=1 SV=3	1.05709	1.07311	1.16732	1.04688	1.59881	1.46398	1.73207	1.39436	0.944223	0.990274	0.955747	0.933292	1.11342	1.06025	0.967679	1.22825	1.13163	1.1796	1.2074	1.16014	1.02023	1.19914	1.33607	1.31567	1.14902	1.04906	1.27783	1.00125	1.22366	1.23208	1.68156	1.59538	1.42919	1.29999	0.762178	0.552444	0.679855	0.678961	0.669242	0.808937	1.10122	0.946582	0.78252	0.628158	NA	NA	NA
P11586	MTHFD1	C-1-tetrahydrofolate synthase, cytoplasmic OS=Homo sapiens OX=9606 GN=MTHFD1 PE=1 SV=3	0.958865	0.768065	0.699066	0.807537	0.632703	0.664205	0.565383	0.99323	NA	NA	NA	NA	NA	NA	NA	NA	NA	NA	NA	NA	NA	NA	NA	NA	0.488084	0.576703	0.920762	1.05227	0.684727	0.838394	1.72154	1.0965	0.782032	0.593903	NA	NA	NA	NA	NA	NA	NA	NA	NA	NA	NA	NA	NA
P11597	CETP	Cholesteryl ester transfer protein OS=Homo sapiens OX=9606 GN=CETP PE=1 SV=2	0.464999	0.574787	0.530675	0.350358	0.535738	0.54764	0.517848	0.482901	0.785781	0.7103	0.815072	0.832545	0.757963	0.953629	1.06113	0.545405	0.933162	0.987601	0.685296	0.705834	1.00173	1.23525	1.20974	1.31285	1.33237	1.39185	0.731485	1.36311	0.885215	1.09104	0.937831	1.06836	1.09931	1.16789	1.59361	1.45307	1.25588	1.33506	1.30604	1.44985	1.17283	1.3723	0.984389	1.14155	1.27899	1.19053	1.16288
P11684	SCGB1A1	Uteroglobin OS=Homo sapiens OX=9606 GN=SCGB1A1 PE=1 SV=1	0.718072	0.774104	0.855714	1.10229	0.945664	0.924407	1.71701	2.73606	1.27775	1.15733	1.26155	2.90452	1.30849	1.22205	1.5645	1.21067	NA	NA	NA	NA	NA	NA	NA	NA	NA	NA	NA	NA	NA	NA	NA	NA	NA	NA	NA	NA	NA	NA	NA	NA	NA	NA	NA	NA	NA	NA	NA
P11717	IGF2R	Cation-independent mannose-6-phosphate receptor OS=Homo sapiens OX=9606 GN=IGF2R PE=1 SV=3	1.20907	1.0601	1.29325	1.22391	1.22035	1.01326	1.0274	1.07758	0.553671	1.1281	0.63728	0.714596	0.646714	0.678961	0.605668	0.764665	0.82582	0.999792	0.869284	0.868261	0.893166	0.919359	0.943831	0.918658	1.17723	1.03706	1.03498	1.01326	0.97279	1.02897	1.06526	1.06925	0.954886	0.758647	0.818696	1.66879	0.627462	0.668222	0.728045	0.727692	0.803907	0.626028	0.73489	0.518315	0.355544	1.17511	0.358017
P12109	COL6A1	Collagen alpha-1(VI) chain OS=Homo sapiens OX=9606 GN=COL6A1 PE=1 SV=3	0.716332	0.906827	1.05402	1.48072	1.00689	0.975085	1.34957	1.28289	0.76993	0.886505	0.872847	0.856426	1.01706	0.971846	0.989931	0.962061	0.989177	1.03677	0.922359	1.0309	1.04884	0.930192	0.952374	0.983638	0.532554	0.496133	0.460636	0.561828	0.454673	0.463133	0.484847	0.565736	0.47025	0.453257	NA	NA	NA	NA	NA	NA	NA	NA	NA	NA	0.888227	0.673103	0.662136
P12111	COL6A3	Collagen alpha-3(VI) chain OS=Homo sapiens OX=9606 GN=COL6A3 PE=1 SV=5	0.938286	1.06142	1.38963	1.16514	1.18534	1.24859	1.52087	1.37297	0.898631	1.00521	1.06467	1.1883	0.997923	1.0503	1.07684	1.0657	0.964732	1.07669	1.00403	1.05995	1.00118	1.08613	1.35341	1.28343	1.23234	1.22519	1.17462	1.41235	1.19922	1.25336	1.26383	1.2945	1.26637	1.17813	1.25571	1.03526	1.17072	0.920379	0.941087	0.990961	1.1774	0.962795	0.813266	0.797745	1.04218	0.91834	1.00814
P12259	F5	Coagulation factor V OS=Homo sapiens OX=9606 GN=F5 PE=1 SV=4	1.38559	0.797303	1.24255	1.15998	1.1935	1.03792	1.07609	0.745459	0.870611	0.931934	0.820514	1.09202	0.782032	1.40007	0.809554	1.04406	0.979488	0.778031	0.737901	1.0184	1.07788	1.13903	1.1969	1.31951	0.838278	1.24902	1.0896	0.889706	1.04834	0.894963	0.990206	0.722215	1.27438	0.912376	1.13603	1.20355	1.96878	1.24375	0.968283	1.20122	1.33506	1.38166	1.22247	1.07542	1.77399	1.2937	1.53283
P12429	ANXA3	Annexin A3 OS=Homo sapiens OX=9606 GN=ANXA3 PE=1 SV=3	NA	NA	NA	NA	NA	NA	NA	NA	NA	NA	NA	NA	NA	NA	NA	NA	1.14942	0.801292	0.742365	1.25658	1.08425	0.944354	1.49682	1.05724	NA	NA	NA	NA	NA	NA	NA	NA	NA	NA	0.643539	1.64023	0.682831	2.04387	0.628725	0.666834	1.02009	1.96129	1.34835	1.90673	1.2268	2.08074	1.23448
P12814	ACTN1	Alpha-actinin-1 OS=Homo sapiens OX=9606 GN=ACTN1 PE=1 SV=2	0.870189	0.580432	0.945861	0.881725	0.553632	0.47293	0.561555	0.498063	1.21731	0.74898	1.20514	0.860591	1.27881	0.793719	0.933486	0.701493	1.08568	0.982548	0.75132	0.685011	0.805245	0.958599	0.662228	0.875998	1.67342	0.761544	0.921656	1.3931	0.901313	1.06032	0.569829	1.94369	0.680751	1.90898	0.623992	1.3535	0.706421	1.56743	0.891558	0.784802	0.91834	1.5593	0.902251	1.76406	0.911807	1.36595	0.82978
P12830	CDH1	Cadherin-1 OS=Homo sapiens OX=9606 GN=CDH1 PE=1 SV=3	1.12078	0.996471	1.11682	2.26404	1.00668	1.10313	1.44173	1.70586	0.783932	0.968551	1.00139	1.17715	1.15974	1.03936	1.03083	1.24807	0.815016	1.04023	1.04834	0.968551	0.902501	0.953431	1.08862	0.998061	0.45483	1.08847	1.09263	0.815185	0.992817	0.709119	1.56721	1.14886	1.58052	0.656288	NA	NA	NA	NA	NA	NA	NA	NA	NA	NA	1.0372	1.19234	0.783171
P12931	SRC	Proto-oncogene tyrosine-protein kinase Src OS=Homo sapiens OX=9606 GN=SRC PE=1 SV=3	NA	NA	NA	NA	NA	NA	NA	NA	NA	NA	NA	NA	NA	NA	NA	NA	NA	NA	NA	NA	NA	NA	NA	NA	NA	NA	NA	NA	NA	NA	NA	NA	NA	NA	1.76357	1.57102	1.88688	1.08658	1.45498	1.30441	1.44643	1.63116	2.05053	1.60281	1.10965	2.25339	2.1038
P12955	PEPD	Xaa-Pro dipeptidase OS=Homo sapiens OX=9606 GN=PEPD PE=1 SV=3	1.20506	0.871154	0.98432	1.1256	1.38309	1.57789	1.25536	1.28976	1.14314	1.27527	1.22044	1.22306	0.732246	1.03462	0.777277	1.05621	1.14314	0.995229	1.11636	1.17862	1.07319	0.908463	0.992748	0.950264	1.02087	1.07975	1.04877	0.88032	1.30008	1.42158	1.10076	0.962194	1.008	1.01875	1.57614	1.36216	1.32777	1.13855	0.788947	1.49723	0.781328	1.09817	1.03526	0.915036	1.2937	1.09984	1.38751
P13489	RNH1	Ribonuclease inhibitor OS=Homo sapiens OX=9606 GN=RNH1 PE=1 SV=2	0.794324	0.947239	1.07609	1.65187	1.09642	0.985823	1.08185	1.50556	NA	NA	NA	NA	NA	NA	NA	NA	NA	NA	NA	NA	NA	NA	NA	NA	NA	NA	NA	NA	NA	NA	NA	NA	NA	NA	1.62259	1.26883	1.87332	1.96401	1.61027	1.37307	1.64638	1.71166	1.35679	1.35764	1.24617	1.07796	1.58052
P13497	BMP1	Bone morphogenetic protein 1 OS=Homo sapiens OX=9606 GN=BMP1 PE=1 SV=2	NA	NA	NA	NA	NA	NA	NA	NA	NA	NA	NA	NA	NA	NA	NA	NA	0.579387	0.713458	0.592711	0.851808	0.614038	0.861546	1.24634	1.10773	NA	NA	NA	NA	NA	NA	NA	NA	NA	NA	NA	NA	NA	NA	NA	NA	NA	NA	NA	NA	1.05892	1.0697	1.36207
P13591	NCAM1	Neural cell adhesion molecule 1 OS=Homo sapiens OX=9606 GN=NCAM1 PE=1 SV=3	0.812985	0.910354	0.817109	0.846628	0.979217	0.913515	0.864897	1.15861	1.06025	1.10183	1.10596	1.07549	1.01677	1.05373	0.947173	0.97495	0.913578	0.975558	0.702855	0.732347	0.820116	0.779381	0.908967	0.867298	1.16223	1.19839	1.24686	1.02712	1.07111	1.19532	1.10053	1.14942	1.2812	1.27465	1.15565	0.853759	1.15149	0.853759	1.28023	1.26208	1.11512	0.925946	0.96607	0.951252	1.09718	0.936792	1.06098
P13611	VCAN	Versican core protein OS=Homo sapiens OX=9606 GN=VCAN PE=1 SV=3	0.878857	1.09878	1.19135	1.89789	1.54371	1.16304	1.47734	2.37545	NA	NA	NA	NA	NA	NA	NA	NA	NA	NA	NA	NA	NA	NA	NA	NA	NA	NA	NA	NA	NA	NA	NA	NA	NA	NA	NA	NA	NA	NA	NA	NA	NA	NA	NA	NA	NA	NA	NA
P13645	KRT10	Keratin, type I cytoskeletal 10 OS=Homo sapiens OX=9606 GN=KRT10 PE=1 SV=6	0.566874	0.419749	0.324975	0.493321	0.366631	0.382677	0.304666	0.318795	0.297797	0.374932	0.310981	0.401563	0.341723	0.317208	0.355618	0.365312	0.146615	0.21976	0.249377	0.243197	0.210195	0.232725	0.416272	0.199976	0.50934	0.511214	0.262939	0.45755	0.27327	0.347263	0.426761	0.29181	0.347263	0.734788	0.228015	0.37864	0.254635	0.311326	0.198443	0.21579	0.317802	0.336016	0.375478	0.39719	0.209105	0.157366	0.444637
P13667	PDIA4	Protein disulfide-isomerase A4 OS=Homo sapiens OX=9606 GN=PDIA4 PE=1 SV=2	1.12086	0.898506	1.37287	1.194	1.26269	1.0115	1.35651	1.1068	NA	NA	NA	NA	NA	NA	NA	NA	1.33719	0.952704	1.31759	1.2612	0.987122	1.14504	0.968484	1.09619	NA	NA	NA	NA	NA	NA	NA	NA	NA	NA	NA	NA	NA	NA	NA	NA	NA	NA	NA	NA	NA	NA	NA
P13671	C6	Complement component C6 OS=Homo sapiens OX=9606 GN=C6 PE=1 SV=3	1.11682	0.971644	1.32823	1.00737	1.51309	1.40182	1.26953	0.86077	1.13477	1.04551	1.11497	1.13564	0.920379	1.49952	1.26015	1.24358	1.37192	1.12179	0.988765	1.16619	1.2999	1.18715	1.43824	1.38147	1.14719	1.1796	1.27695	1.12412	1.06459	1.05416	1.16006	1.20924	1.24677	1.14045	1.17406	0.747425	1.26742	0.754556	1.00062	0.848096	1.17048	0.891002	1.10558	0.797358	0.953232	0.720465	0.905885
P13796	LCP1	Plastin-2 OS=Homo sapiens OX=9606 GN=LCP1 PE=1 SV=6	0.928195	1.15173	1.28387	1.07758	1.38175	2.27631	1.35679	1.31458	1.03987	1.06962	1.37965	1.51351	1.37898	1.39503	1.36018	1.50202	1.0073	1.28227	1.05716	0.934651	1.07386	0.832891	1.07751	0.690207	0.961527	0.805189	1.34686	0.819037	0.890878	0.777277	0.957271	0.802404	0.789932	0.753772	1.43018	0.888042	1.63422	0.815242	1.17666	0.888104	1.2404	0.991304	0.964866	0.84405	1.04921	0.889644	1.02463
P13798	APEH	Acylamino-acid-releasing enzyme OS=Homo sapiens OX=9606 GN=APEH PE=1 SV=4	NA	NA	NA	NA	NA	NA	NA	NA	NA	NA	NA	NA	NA	NA	NA	NA	NA	NA	NA	NA	NA	NA	NA	NA	NA	NA	NA	NA	NA	NA	NA	NA	NA	NA	NA	NA	NA	NA	NA	NA	NA	NA	NA	NA	NA	NA	NA
P14151	SELL	L-selectin OS=Homo sapiens OX=9606 GN=SELL PE=1 SV=2	0.888781	0.994953	0.870732	0.689012	0.900626	0.806418	0.692603	0.841946	1.12576	0.99654	1.20623	1.14298	1.09688	1.13406	1.20072	1.07304	0.981799	1.11884	0.707499	0.622265	0.737135	0.589025	0.979217	0.814395	1.32721	1.29891	1.02066	1.09058	1.03836	1.15934	0.974545	1.03944	1.13737	1.10007	1.63127	1.18009	1.51236	1.19897	1.36424	1.51835	1.2314	1.18526	1.10213	1.34639	1.19549	1.15493	1.19565
P14209	CD99	CD99 antigen OS=Homo sapiens OX=9606 GN=CD99 PE=1 SV=1	0.853759	0.871275	1.72728	1.97685	0.766204	1.18288	0.866877	0.773997	0.823648	0.903502	0.762072	0.675206	1.19723	1.08711	1.12951	0.957603	0.509976	0.489235	0.71862	0.719217	1.02463	1.14013	0.937961	0.95767	1.11822	1.11915	1.1687	1.00968	1.15926	1.50191	1.54168	1.39107	0.530564	0.676377	NA	NA	NA	NA	NA	NA	NA	NA	NA	NA	NA	NA	NA
P14314	PRKCSH	Glucosidase 2 subunit beta OS=Homo sapiens OX=9606 GN=PRKCSH PE=1 SV=2	0.787581	0.911491	1.07252	1.37002	1.0372	1.16312	1.60325	1.30822	0.847039	0.775608	0.97468	0.867479	1.05395	0.966874	0.986506	0.938481	0.917513	0.929998	1.26997	0.879222	0.835551	0.926331	0.963329	0.861785	0.988971	0.812478	1.08335	1.05944	0.793114	0.781382	1.59826	1.11504	1.2404	0.931418	1.19706	1.26681	1.58931	1.36538	0.958068	0.940305	1.1228	1.04674	1.07319	1.35144	1.0629	1.17707	1.00257
P14543	NID1	Nidogen-1 OS=Homo sapiens OX=9606 GN=NID1 PE=1 SV=3	1.13446	0.846393	1.27792	1.41059	1.17838	1.05424	1.37554	1.19748	1.00257	0.82978	0.566638	1.43814	0.712272	1.12771	0.609797	0.812084	1.00947	0.818129	1.23962	1.11535	0.886136	0.948882	0.980779	0.930837	0.79207	0.960528	1.07557	0.963997	1.11675	0.867659	1.34304	0.779111	1.2511	0.785781	1.13218	1.11388	1.39291	1.09672	1.02165	1.05482	1.09946	1.10619	1.09422	1.03154	1.3786	1.1169	1.26909
P14555	PLA2G2A	Phospholipase A2, membrane associated OS=Homo sapiens OX=9606 GN=PLA2G2A PE=1 SV=2	0.880686	1.24755	3.97182	0.759804	1.2963	1.22561	2.11096	1.85742	NA	NA	NA	NA	NA	NA	NA	NA	0.934263	0.947436	1.46277	1.02562	1.10168	0.782086	1.00933	0.675581	NA	NA	NA	NA	NA	NA	NA	NA	NA	NA	NA	NA	NA	NA	NA	NA	NA	NA	NA	NA	NA	NA	NA
P14618	PKM	Pyruvate kinase PKM OS=Homo sapiens OX=9606 GN=PKM PE=1 SV=4	0.979352	0.711236	0.845865	1.2416	0.835146	0.855714	0.817052	1.08103	1.43475	0.769397	0.881358	1.045	0.840605	0.851513	0.770785	0.906639	1.02038	0.735552	0.67849	0.802404	0.82886	1.02215	0.770304	0.850982	1.23559	0.988012	0.991511	0.9084	1.25084	0.839615	0.837987	1.32455	0.92871	1.05074	0.730218	1.90805	0.883315	2.07355	1.05504	1.11528	0.976302	1.86723	1.51666	2.32205	1.23833	1.64775	1.61989
P14625	HSP90B1	Endoplasmin OS=Homo sapiens OX=9606 GN=HSP90B1 PE=1 SV=1	1.18871	0.909787	1.2999	1.17414	1.06932	1.23851	1.00828	0.968484	1.0463	0.830355	0.964799	1.02137	0.947698	1.12016	1.0329	1.10328	1.23979	0.902376	1.37955	1.21008	1.09741	1.00438	0.975017	0.824619	1.12638	0.922295	1.12553	0.948224	0.959131	0.803684	1.13871	1.14989	0.765514	0.768278	1.12163	1.15405	1.43127	1.264	0.962061	0.928195	1.22069	1.26795	1.09908	1.11884	0.962928	0.725074	0.877518
P14780	MMP9	Matrix metalloproteinase-9 OS=Homo sapiens OX=9606 GN=MMP9 PE=1 SV=3	1.33886	1.51194	1.81529	1.59218	0.930837	0.849685	0.801959	0.79664	0.702904	0.883438	0.848861	1.13485	1.03261	1.46388	1.41529	1.41235	0.779165	0.949276	0.713408	0.736164	1.05154	0.775877	1.95938	0.61323	1.1756	1.00229	1.67679	0.708186	0.991854	1.00723	1.71475	2.03454	0.777277	0.695055	NA	NA	NA	NA	NA	NA	NA	NA	NA	NA	0.73739	0.853049	1.41647
P15090	FABP4	Fatty acid-binding protein, adipocyte OS=Homo sapiens OX=9606 GN=FABP4 PE=1 SV=3	1.0213	1.10366	1.31933	4.00916	1.26033	1.30921	1.63558	1.91308	NA	NA	NA	NA	NA	NA	NA	NA	0.620112	2.08782	0.822165	1.16175	0.736164	1.01206	1.25449	2.07398	NA	NA	NA	NA	NA	NA	NA	NA	NA	NA	NA	NA	NA	NA	NA	NA	NA	NA	NA	NA	NA	NA	NA
P15144	ANPEP	Aminopeptidase N OS=Homo sapiens OX=9606 GN=ANPEP PE=1 SV=4	1.27491	1.19831	1.15069	0.911807	1.09885	0.799628	0.799683	0.791905	0.833527	0.828745	0.813943	1.09376	0.937506	1.15894	1.12405	1.12521	1.13784	1.2361	1.28842	1.24651	1.08636	1.10473	0.933551	1.06032	1.19881	1.15918	0.808377	0.946451	0.913768	0.968752	0.89664	1.05161	0.889089	1.03562	0.916559	0.832314	1.47366	1.16127	0.981119	0.937051	1.18296	0.986575	1.0203	0.823819	0.889028	1.26269	0.926267
P15151	PVR	Poliovirus receptor OS=Homo sapiens OX=9606 GN=PVR PE=1 SV=2	1.06807	1.10328	1.29936	0.932904	1.0893	1.06481	1.01579	0.850982	1.03004	1.04972	1.21016	1.33117	1.23765	1.30342	1.15541	1.43983	1.06378	1.08478	1.04543	1.01234	0.913008	0.790918	0.837871	0.690015	0.696213	0.885829	0.844694	0.534625	1.40942	1.03412	1.22688	0.97786	1.01939	0.967343	1.35135	1.0546	1.48483	1.06209	1.19939	1.21327	1.37726	1.14322	1.32033	1.02356	0.970096	0.871215	0.928131
P15153	RAC2	Ras-related C3 botulinum toxin substrate 2 OS=Homo sapiens OX=9606 GN=RAC2 PE=1 SV=1	NA	NA	NA	NA	NA	NA	NA	NA	1.7872	0.78404	1.07445	1.06267	0.844694	0.791905	0.558876	0.851513	NA	NA	NA	NA	NA	NA	NA	NA	NA	NA	NA	NA	NA	NA	NA	NA	NA	NA	0.647342	2.32382	1.02108	2.86791	1.18198	1.24703	1.05373	2.62206	1.64376	2.62788	1.24401	2.06795	1.35604
P15169	CPN1	Carboxypeptidase N catalytic chain OS=Homo sapiens OX=9606 GN=CPN1 PE=1 SV=1	0.699114	0.598947	0.775125	0.748358	1.31887	1.33876	1.21016	0.858625	1.06858	0.90689	0.82978	1.32116	0.779003	1.40961	0.871879	0.989794	1.22578	0.839615	0.808097	1.02626	1.15453	1.05519	1.52224	1.29379	0.851867	1.20289	1.15213	0.636795	1.19391	0.800681	1.51204	0.782683	1.29065	0.885829	0.99323	1.16603	1.72118	1.38137	0.913705	1.36898	1.32079	1.34546	1.38463	1.25806	1.393	1.39871	1.66474
P15814	IGLL1	Immunoglobulin lambda-like polypeptide 1 OS=Homo sapiens OX=9606 GN=IGLL1 PE=1 SV=1	0.773997	0.936727	0.921784	0.778139	0.914782	0.868381	0.735756	0.924407	1.20974	2.41881	1.14227	1.14219	1.3196	1.33895	1.29253	1.24384	0.895335	1.14155	1.08305	1.07207	1.14814	0.893352	1.09111	0.839499	3.78266	3.1186	1.13336	1.14576	1.01403	1.27536	0.902501	0.902563	0.821823	0.688343	1.04608	0.961861	0.935753	0.763712	0.92974	0.876849	1.01094	0.751685	0.931159	0.665495	1.07073	1.30441	0.86814
P15907	ST6GAL1	Beta-galactoside alpha-2,6-sialyltransferase 1 OS=Homo sapiens OX=9606 GN=ST6GAL1 PE=1 SV=1	NA	NA	NA	NA	NA	NA	NA	NA	0.996195	0.985686	1.07386	1.7486	1.07162	1.40639	1.27332	1.20039	NA	NA	NA	NA	NA	NA	NA	NA	NA	NA	NA	NA	NA	NA	NA	NA	NA	NA	NA	NA	NA	NA	NA	NA	NA	NA	NA	NA	NA	NA	NA
P16035	TIMP2	Metalloproteinase inhibitor 2 OS=Homo sapiens OX=9606 GN=TIMP2 PE=1 SV=2	1.05168	1.0329	1.09619	1.16103	1.0896	1.26278	1.38973	1.35322	0.980371	1.22808	1.02697	1.4063	1.11651	1.25823	0.949869	1.22927	NA	NA	NA	NA	NA	NA	NA	NA	1.03226	1.11659	1.12249	1.08741	1.16627	1.02137	1.29945	1.28414	1.38847	1.24418	NA	NA	NA	NA	NA	NA	NA	NA	NA	NA	NA	NA	NA
P16070	CD44	CD44 antigen OS=Homo sapiens OX=9606 GN=CD44 PE=1 SV=3	0.933939	1.24427	1.34761	1.31157	1.12748	1.40017	1.39339	1.37116	1.05154	1.05541	1.005	1.32813	0.964598	1.27147	1.18937	1.17674	0.870973	1.1065	1.02342	0.987464	1.19102	1.35905	1.33811	1.39707	1.40922	1.47468	1.13469	1.45851	1.02933	1.06629	1.16014	1.31285	1.2349	1.36094	0.790808	0.749344	0.762759	0.697372	0.682641	0.791851	0.692603	0.663101	0.445192	0.576583	NA	NA	NA
P16109	SELP	P-selectin OS=Homo sapiens OX=9606 GN=SELP PE=1 SV=3	NA	NA	NA	NA	NA	NA	NA	NA	1.52436	1.0826	1.25223	1.457	1.7526	1.41225	1.20589	1.1674	NA	NA	NA	NA	NA	NA	NA	NA	1.43794	1.14591	2.01238	1.15197	1.11837	1.22663	1.08591	1.35971	0.927873	1.06341	NA	NA	NA	NA	NA	NA	NA	NA	NA	NA	NA	NA	NA
P16930	FAH	Fumarylacetoacetase OS=Homo sapiens OX=9606 GN=FAH PE=1 SV=2	1.41745	1.13926	1.00083	0.814903	1.17993	1.20222	1.01537	1.10949	0.893104	0.923959	0.835551	1.08237	1.04928	1.12975	0.896142	1.13863	1.29146	0.986301	1.70456	1.25693	0.756127	0.678584	0.777223	0.787635	1.13383	0.879832	1.02626	0.928131	1.21335	1.12568	1.36699	0.843816	0.857495	0.70848	0.925304	0.729662	1.0416	1.17952	0.861606	1.09536	0.827597	1.45025	0.976167	0.864597	NA	NA	NA
P17174	GOT1	Aspartate aminotransferase, cytoplasmic OS=Homo sapiens OX=9606 GN=GOT1 PE=1 SV=3	1.35332	0.940239	1.08207	1.39561	1.13477	0.959796	1.27509	1.95152	NA	NA	NA	NA	NA	NA	NA	NA	1.67725	1.03419	2.10891	1.27881	1.008	0.975085	0.899067	0.867599	0.904003	0.785455	0.732144	0.844342	0.826565	0.851277	1.32565	0.892176	0.895211	0.785618	1.06267	0.968618	1.12373	0.694429	1.00947	0.87206	0.87436	0.934651	0.949869	1.05132	NA	NA	NA
P17931	LGALS3	Galectin-3 OS=Homo sapiens OX=9606 GN=LGALS3 PE=1 SV=5	0.78589	0.878065	0.958467	1.11992	1.1003	1.07818	0.930837	1.09422	1.0016	1.03033	1.10275	1.87957	0.876606	1.12109	1.24894	1.19102	0.935753	1.25579	0.990274	1.09764	1.34294	1.40376	1.396	3.21719	0.84288	0.926074	0.960462	1.11528	1.02406	0.894343	1.09756	0.8461	1.07818	0.799738	1.90646	1.54875	1.03319	1.1649	1.18271	1.5154	1.19267	1.17723	1.2291	1.36245	1.12889	1.02349	1.30008
P17936	IGFBP3	Insulin-like growth factor-binding protein 3 OS=Homo sapiens OX=9606 GN=IGFBP3 PE=1 SV=2	0.682641	0.740001	0.966003	0.636883	0.930901	0.774641	0.800016	0.756284	0.656288	0.870732	0.916623	1.00097	0.789603	1.20272	0.892361	1.02911	0.965267	1.11589	1.00417	1.12709	0.769557	1.05023	0.668686	1.20147	1.55111	1.88283	1.01361	1.30026	0.988217	1.25806	0.848743	0.953563	1.40483	1.61866	1.36103	1.31997	1.35736	1.52806	1.61619	1.92813	1.42603	1.53209	1.40299	1.42149	1.15926	1.52615	1.5881
P18065	IGFBP2	Insulin-like growth factor-binding protein 2 OS=Homo sapiens OX=9606 GN=IGFBP2 PE=1 SV=2	1.17283	1.35811	1.91335	1.92292	1.27341	1.17691	1.38022	1.13288	0.878613	0.766682	0.847861	0.817052	0.956542	1.0179	0.841771	0.868863	1.02328	0.97942	1.272	1.18501	0.929869	1.01438	1.67772	1.0546	0.758279	0.929612	1.14306	0.954621	0.798907	0.912249	0.964598	0.84113	1.18797	0.735501	1.2349	1.26251	1.10275	1.01685	0.89695	0.922806	1.46673	1.33274	1.34733	0.791576	NA	NA	NA
P18206	VCL	Vinculin OS=Homo sapiens OX=9606 GN=VCL PE=1 SV=4	0.898195	0.765301	0.920443	0.81462	0.785564	1.059	0.912755	0.687723	1.40659	0.883009	1.32832	0.982412	1.16789	0.933551	0.89969	0.844635	1.48236	1.12047	1.04921	1.00493	1.0579	1.2355	0.959331	1.0398	1.5154	0.942066	1.18715	1.32602	1.34043	1.21849	0.862801	1.43237	0.883499	1.61956	0.995505	1.82627	1.08704	2.31787	1.67876	1.2886	1.24513	2.02399	1.52986	2.26467	1.12482	1.50514	1.12584
P18428	LBP	Lipopolysaccharide-binding protein OS=Homo sapiens OX=9606 GN=LBP PE=1 SV=3	0.975423	1.42504	1.78621	1.04471	1.24963	1.46856	1.42454	1.47386	0.867599	0.811127	0.960928	1.32216	1.47826	1.46388	1.66106	1.13571	1.04218	1.23756	1.07252	0.955482	1.10336	0.81592	1.22884	0.849921	0.8679	0.854528	1.14607	1.15397	0.813887	0.826966	1.18534	1.08975	0.889089	0.844518	1.08088	0.531301	1.72273	0.857852	0.795206	0.611786	1.01277	0.63556	1.2201	0.683067	1.4571	0.680987	1.1832
P18669	PGAM1	Phosphoglycerate mutase 1 OS=Homo sapiens OX=9606 GN=PGAM1 PE=1 SV=2	0.8679	0.775931	0.930192	1.25188	1.14322	0.890076	0.791466	1.08373	0.897199	0.916432	0.880991	0.912692	1.12904	1.04319	1.01368	0.986233	1.00723	0.894157	0.847744	0.792015	1.05117	0.985208	0.876302	0.994057	1.09028	0.981663	0.873028	1.02441	0.975694	1.08185	0.870551	1.07438	1.00375	1.06142	0.947633	0.975288	0.849685	1.10619	0.88405	0.890446	0.82886	1.05526	0.957736	1.09802	1.2804	1.28138	1.06179
P18850	ATF6	Cyclic AMP-dependent transcription factor ATF-6 alpha OS=Homo sapiens OX=9606 GN=ATF6 PE=1 SV=3	1.29164	1.01487	1.18624	0.793609	1.51771	1.19276	1.04369	0.906953	0.873149	0.870249	0.914148	1.5015	1.10122	1.13092	1.43157	1.07229	0.87043	1.34332	0.823192	0.704953	0.652342	0.776092	0.848273	0.65948	NA	NA	NA	NA	NA	NA	NA	NA	NA	NA	NA	NA	NA	NA	NA	NA	NA	NA	NA	NA	NA	NA	NA
P19105	MYL12A	Myosin regulatory light chain 12A OS=Homo sapiens OX=9606 GN=MYL12A PE=1 SV=2	NA	NA	NA	NA	NA	NA	NA	NA	NA	NA	NA	NA	NA	NA	NA	NA	NA	NA	NA	NA	NA	NA	NA	NA	NA	NA	NA	NA	NA	NA	NA	NA	NA	NA	0.470022	1.99626	0.977115	3.31935	1.1974	0.924343	1.20798	1.64285	1.2578	3.4781	NA	NA	NA
P19256	CD58	Lymphocyte function-associated antigen 3 OS=Homo sapiens OX=9606 GN=CD58 PE=1 SV=1	1.33543	1.67018	1.26007	1.58843	1.47898	1.33256	1.21647	1.52795	NA	NA	NA	NA	NA	NA	NA	NA	NA	NA	NA	NA	NA	NA	NA	NA	NA	NA	NA	NA	NA	NA	NA	NA	NA	NA	NA	NA	NA	NA	NA	NA	NA	NA	NA	NA	NA	NA	NA
P19320	VCAM1	Vascular cell adhesion protein 1 OS=Homo sapiens OX=9606 GN=VCAM1 PE=1 SV=1	1.10619	1.21613	1.12124	1.36936	1.22935	1.28913	1.22825	1.31403	0.823648	0.803795	0.866337	0.928839	1.07445	1.03491	1.10481	1.1193	0.932839	0.930708	1.04268	1.0398	1.03491	1.09482	1.33617	1.23021	1.05797	0.964732	1.30441	1.42149	0.964933	1.08621	1.30649	1.03792	1.26077	1.13556	1.63592	1.06209	1.53869	0.917894	0.98856	0.902563	0.92057	0.76165	0.802626	0.718819	1.09058	0.750071	0.82909
P19652	ORM2	Alpha-1-acid glycoprotein 2 OS=Homo sapiens OX=9606 GN=ORM2 PE=1 SV=2	1.26479	1.4836	1.75443	1.39165	1.46612	1.5233	1.24074	1.05373	1.06733	0.948487	1.14663	1.22952	1.29792	1.38511	1.38751	1.0817	1.64878	1.76553	1.37898	1.12062	1.35247	1.07073	0.967477	0.882091	1.14663	0.919104	1.42415	1.35023	0.913262	0.860353	1.04913	0.925176	1.20572	1.15325	0.349678	0.290156	0.395185	0.243282	0.263724	0.233744	0.291587	0.193983	0.221013	0.15227	0.262266	0.244143	0.242675
P19823	ITIH2	Inter-alpha-trypsin inhibitor heavy chain H2 OS=Homo sapiens OX=9606 GN=ITIH2 PE=1 SV=2	0.520547	0.578705	0.596213	0.577223	0.679997	0.652297	0.624728	0.61553	0.76165	0.892176	0.947896	0.911744	1.01354	1.24255	1.07542	1.03649	0.672777	0.88148	0.631651	0.694093	0.749604	0.995988	0.754242	1.23962	1.30486	1.46094	0.904818	1.06577	0.944027	1.31121	1.10742	1.33487	1.2945	1.35971	1.2981	1.23388	1.0968	1.24436	1.1717	1.35981	1.141	1.22188	1.05125	1.21403	1.07758	1.32878	1.11543
P19827	ITIH1	Inter-alpha-trypsin inhibitor heavy chain H1 OS=Homo sapiens OX=9606 GN=ITIH1 PE=1 SV=3	0.681223	0.71094	0.745975	0.770999	0.856544	0.773568	0.712963	0.727894	0.818469	0.857911	0.967343	1.0615	1.01734	1.27668	1.11334	1.02406	0.712025	0.858268	0.657973	0.738618	0.797635	0.896391	0.816939	1.17292	1.27969	1.3878	0.975288	1.16449	0.929612	1.14449	1.04993	1.24194	1.17121	1.29729	1.26883	1.16231	1.22289	1.28369	1.26716	1.28976	1.15829	1.11613	1.13887	1.21234	1.15493	1.29119	1.1708
P19961	AMY2B	Alpha-amylase 2B OS=Homo sapiens OX=9606 GN=AMY2B PE=1 SV=1	NA	NA	NA	NA	NA	NA	NA	NA	NA	NA	NA	NA	NA	NA	NA	NA	1.06836	1.18896	0.898568	0.764877	0.972722	0.814677	1.12873	0.938937	NA	NA	NA	NA	NA	NA	NA	NA	NA	NA	NA	NA	NA	NA	NA	NA	NA	NA	NA	NA	0.724923	0.564678	0.732246
P19971	TYMP	Thymidine phosphorylase OS=Homo sapiens OX=9606 GN=TYMP PE=1 SV=2	NA	NA	NA	NA	NA	NA	NA	NA	NA	NA	NA	NA	NA	NA	NA	NA	NA	NA	NA	NA	NA	NA	NA	NA	1.19309	0.90689	1.40873	0.680327	1.52235	0.825191	1.22629	0.913072	0.93504	1.12451	0.682358	0.946648	1.03562	1.58129	0.972588	0.748098	0.79026	1.23149	1.11327	1.23063	NA	NA	NA
P20073	ANXA7	Annexin A7 OS=Homo sapiens OX=9606 GN=ANXA7 PE=1 SV=3	NA	NA	NA	NA	NA	NA	NA	NA	1.48751	1.02314	1.06703	1.14258	0.565461	0.657471	0.546465	0.876363	NA	NA	NA	NA	NA	NA	NA	NA	0.745872	1.00549	0.719816	0.561789	1.5016	0.543292	0.766629	0.470772	0.980507	0.960062	NA	NA	NA	NA	NA	NA	NA	NA	NA	NA	NA	NA	NA
P20618	PSMB1	Proteasome subunit beta type-1 OS=Homo sapiens OX=9606 GN=PSMB1 PE=1 SV=2	1.27332	1.08945	1.04384	0.938286	1.33598	1.98055	1.65439	1.40347	0.934198	1.07945	1.09278	1.03987	1.29128	1.10588	1.03354	1.21075	1.32116	1.26348	1.73556	1.53082	1.17838	1.05409	1.29513	1.10359	0.957338	0.946582	1.35679	1.02335	1.06829	1.04384	1.11273	1.14894	1.14037	1.06201	NA	NA	NA	NA	NA	NA	NA	NA	NA	NA	0.825134	0.484813	1.17944
P20700	LMNB1	Lamin-B1 OS=Homo sapiens OX=9606 GN=LMNB1 PE=1 SV=2	NA	NA	NA	NA	NA	NA	NA	NA	0.855773	0.890261	0.945468	0.971375	1.15589	1.15077	1.00793	0.979149	1.04261	1.27306	1.23422	0.992542	1.16288	0.86304	1.3931	1.0479	NA	NA	NA	NA	NA	NA	NA	NA	NA	NA	1.51835	0.664297	1.37783	0.59733	1.06164	0.443713	0.774802	0.559031	0.765514	0.795481	1.00675	1.28271	0.989245
P20742	PZP	Pregnancy zone protein OS=Homo sapiens OX=9606 GN=PZP PE=1 SV=4	1.17137	1.21419	1.11273	1.02314	0.752258	0.65497	0.680657	0.731992	1.15429	1.0987	1.16111	1.20355	0.643316	0.677034	0.696502	0.614805	0.910733	1.02441	0.779219	0.789932	0.700424	0.822222	0.931224	1.2043	0.889891	0.870792	1.2844	2.05951	0.67619	0.765354	0.753197	0.767054	1.11473	1.06216	0.788564	0.773729	1.25518	1.09346	1.27509	1.25501	2.03722	1.62023	0.842005	0.584997	1.96919	2.57719	0.771908
P20774	OGN	Mimecan OS=Homo sapiens OX=9606 GN=OGN PE=1 SV=1	0.796033	0.541337	0.675347	0.875088	0.811577	0.677973	0.883989	0.884847	1.27642	1.29173	0.850215	1.34108	0.70907	0.929354	0.621187	0.834567	0.94783	0.74149	0.569236	0.809835	1.10206	1.25736	1.68939	1.94073	NA	NA	NA	NA	NA	NA	NA	NA	NA	NA	NA	NA	NA	NA	NA	NA	NA	NA	NA	NA	NA	NA	NA
P20810	CAST	Calpastatin OS=Homo sapiens OX=9606 GN=CAST PE=1 SV=4	0.950989	1.04261	1.24246	2.22808	1.52647	1.34873	1.41588	2.36428	0.830931	1.10865	0.837813	0.89664	0.909787	0.832545	0.780083	1.32951	NA	NA	NA	NA	NA	NA	NA	NA	0.751477	0.494828	1.20673	0.661815	0.759225	0.716878	0.619596	0.79482	0.498132	0.72618	1.26251	1.1292	0.926588	0.847156	0.928066	0.916115	0.948882	0.841888	0.900501	0.921273	1.45417	0.994746	1.11257
P20851	C4BPB	C4b-binding protein beta chain OS=Homo sapiens OX=9606 GN=C4BPB PE=1 SV=1	1.08658	1.27315	1.27244	0.912692	1.43386	1.44533	1.30486	1.03958	1.0016	0.990755	1.08478	0.900813	1.33413	1.3785	1.31987	0.923766	1.15709	1.32703	1.04572	0.961727	1.20005	1.10573	1.4933	1.17846	1.63241	1.22129	1.26927	1.34388	1.01291	1.04957	1.07363	0.96929	0.969155	1.06688	1.04493	0.730522	1.04225	0.814564	1.10926	0.889274	1.18526	0.883928	0.981323	0.688534	0.334436	0.346734	0.407904
P20908	COL5A1	Collagen alpha-1(V) chain OS=Homo sapiens OX=9606 GN=COL5A1 PE=1 SV=3	0.716034	1.00905	1.87319	1.92826	1.29343	1.64467	1.57091	1.92026	NA	NA	NA	NA	NA	NA	NA	NA	NA	NA	NA	NA	NA	NA	NA	NA	1.01333	1.12093	1.44844	1.35971	0.870973	0.851985	0.940957	1.08937	1.01459	1.09688	NA	NA	NA	NA	NA	NA	NA	NA	NA	NA	0.720065	0.622394	0.637413
P21291	CSRP1	Cysteine and glycine-rich protein 1 OS=Homo sapiens OX=9606 GN=CSRP1 PE=1 SV=3	NA	NA	NA	NA	NA	NA	NA	NA	NA	NA	NA	NA	NA	NA	NA	NA	1.51204	1.28023	1.2828	1.59959	1.52151	1.69525	1.19856	1.57713	0.882825	1.02151	1.05892	1.18411	1.30677	1.37821	1.12896	1.20932	1.09051	0.961461	1.10965	1.22434	1.26707	1.07676	0.940891	1.17511	1.1935	1.13296	1.03412	1.24505	1.25449	1.18534	1.06371
P21333	FLNA	Filamin-A OS=Homo sapiens OX=9606 GN=FLNA PE=1 SV=4	0.968618	0.607308	1.14536	0.688821	0.752467	0.830125	1.12506	0.850038	1.07423	0.737237	0.887673	1.19773	1.15093	0.815637	0.970702	0.656925	1.23405	1.05497	0.762654	0.807313	1.56537	0.937441	0.893475	0.934522	1.74545	0.772871	1.13501	0.872121	0.969155	0.895956	0.926845	1.43296	0.736573	0.857495	0.802014	1.81793	1.21571	2.17543	1.02229	1.11644	1.6441	2.65167	1.08711	1.95694	1.33117	1.58151	1.12803
P22061	PCMT1	Protein-L-isoaspartate(D-aspartate) O-methyltransferase OS=Homo sapiens OX=9606 GN=PCMT1 PE=1 SV=4	1.12405	0.896577	1.45488	2.68645	1.02321	0.879771	0.893414	1.16385	1.19449	1.00445	1.00292	1.00521	0.938742	0.938677	0.872968	1.35943	1.03211	0.861307	0.884357	0.977386	1.09187	0.942393	1.06194	0.855061	1.13634	1.11798	0.857852	0.953761	1.15821	0.746751	0.665772	0.839906	0.890693	0.991854	1.19756	1.54993	1.24246	1.3477	0.982208	1.16562	1.34453	1.3218	1.0385	1.33876	1.24462	1.16748	1.0793
P22105	TNXB	Tenascin-X OS=Homo sapiens OX=9606 GN=TNXB PE=1 SV=5	0.854706	0.850569	0.909976	0.862383	0.933421	1.06688	0.997162	0.971712	0.922806	0.928195	0.711137	0.837871	0.64247	0.812928	0.618609	0.717773	0.798022	0.749968	0.729005	0.786926	0.878004	0.909219	0.947633	0.909093	0.789932	1.09255	0.825591	0.691691	1.0487	0.944092	1.04913	0.809667	1.30017	1.03584	1.17968	1.11412	1.16231	1.00989	0.846041	1.32033	1.1292	1.17316	0.940305	1.05856	1.15125	1.19483	1.17887
P22314	UBA1	Ubiquitin-like modifier-activating enzyme 1 OS=Homo sapiens OX=9606 GN=UBA1 PE=1 SV=3	0.780191	0.726483	0.898444	1.02392	0.801681	1.08043	1.089	1.18312	NA	NA	NA	NA	NA	NA	NA	NA	1.25553	1.02215	1.29235	1.38013	1.37716	1.98192	1.30143	1.84574	NA	NA	NA	NA	NA	NA	NA	NA	NA	NA	NA	NA	NA	NA	NA	NA	NA	NA	NA	NA	1.25606	1.09126	1.07229
P22352	GPX3	Glutathione peroxidase 3 OS=Homo sapiens OX=9606 GN=GPX3 PE=1 SV=2	1.089	1.1734	1.12366	1.08561	1.37249	1.60525	1.21108	0.824848	1.28681	1.49454	1.49869	1.37621	1.60625	1.82286	1.61743	2.19071	1.25475	1.30604	1.12795	1.06599	1.04594	0.82542	0.970634	0.788072	1.18001	0.933486	1.08802	0.949276	1.15261	1.30098	1.27209	1.11543	1.0064	0.852044	0.966941	0.721414	0.964799	0.657335	1.05599	0.983434	1.01692	0.779057	0.887365	0.773943	0.988491	0.729409	1.02911
P22392	NME2	Nucleoside diphosphate kinase B OS=Homo sapiens OX=9606 GN=NME2 PE=1 SV=1	0.922231	1.2551	1.4571	2.22854	0.971106	1.22451	1.48885	1.57888	1.16095	0.951648	1.03663	0.877883	1.27174	0.894095	0.737339	0.960595	0.971712	0.878735	0.820002	0.843523	0.898817	0.824162	0.693467	0.678443	NA	NA	NA	NA	NA	NA	NA	NA	NA	NA	1.04667	1.33876	0.932516	1.57462	1.39329	1.13879	1.12709	1.39271	1.29873	1.46764	1.3435	1.10252	1.2163
P22692	IGFBP4	Insulin-like growth factor-binding protein 4 OS=Homo sapiens OX=9606 GN=IGFBP4 PE=1 SV=2	1.10942	1.15093	1.71832	1.26786	1.36113	1.18698	1.31759	1.44043	0.709365	0.798409	0.859876	1.13776	1.02662	1.12553	1.00139	0.973667	1.24738	1.44744	1.2105	1.30731	1.36538	1.26453	1.49589	1.68308	1.28369	1.55348	1.20489	1.4566	1.1169	1.32878	1.47713	1.81882	1.80751	1.59185	0.342079	0.393299	0.51086	0.408413	0.416908	0.392673	0.437605	0.382359	0.381538	0.299536	NA	NA	NA
P22694	PRKACB	cAMP-dependent protein kinase catalytic subunit beta OS=Homo sapiens OX=9606 GN=PRKACB PE=1 SV=2	NA	NA	NA	NA	NA	NA	NA	NA	NA	NA	NA	NA	NA	NA	NA	NA	NA	NA	NA	NA	NA	NA	NA	NA	NA	NA	NA	NA	NA	NA	NA	NA	NA	NA	NA	NA	NA	NA	NA	NA	NA	NA	NA	NA	1.01523	1.07415	0.912249
P22792	CPN2	Carboxypeptidase N subunit 2 OS=Homo sapiens OX=9606 GN=CPN2 PE=1 SV=3	0.589597	0.528875	0.594851	0.606004	1.11026	1.11042	0.906325	0.731231	1.03175	0.965602	0.911364	1.13312	1.19673	1.31823	1.06733	1.0832	1.21335	1.0237	0.829607	0.932322	1.06755	0.869646	1.28325	1.00452	1.11365	1.09111	1.03354	0.841596	1.20556	1.02726	1.32317	0.997854	1.11589	0.994884	0.879466	0.75991	1.34443	1.03994	0.866397	0.88093	0.958932	0.85051	0.922231	0.770625	0.994332	1.0654	1.37907
P22891	PROZ	Vitamin K-dependent protein Z OS=Homo sapiens OX=9606 GN=PROZ PE=1 SV=2	0.547602	0.664297	0.621489	0.471229	0.841538	0.69863	0.633098	0.59704	1.19251	1.30143	1.32125	1.32556	1.39542	1.45639	1.33941	1.63014	0.916305	1.14552	0.988834	1.03326	1.19665	1.08681	1.07803	1.19507	1.40552	1.19267	0.953629	0.838394	1.10084	1.282	0.854351	0.888165	1.61832	1.6391	1.74618	1.54349	1.07549	1.05981	1.29981	1.19177	1.15869	1.20572	1.14369	1.21875	1.11165	1.17113	1.3055
P22897	MRC1	Macrophage mannose receptor 1 OS=Homo sapiens OX=9606 GN=MRC1 PE=1 SV=1	1.21344	1.03886	1.77608	1.22129	1.13548	1.33839	1.50129	1.13414	1.10949	1.30432	1.24117	1.75516	1.07654	1.32436	1.26962	1.79876	0.934004	0.904129	0.997715	1.09361	0.925112	0.887611	1.04319	0.939002	0.706862	0.678161	1.78918	1.01642	1.14029	0.884418	1.36065	0.702076	0.893042	0.508493	0.725124	0.856782	1.37678	1.08621	0.709955	1.31686	1.55801	1.56472	1.23585	0.7607	1.23311	0.629466	0.914275
P23083	IGHV1-2	Immunoglobulin heavy variable 1-2 OS=Homo sapiens OX=9606 GN=IGHV1-2 PE=1 SV=2	0.932322	1.12631	1.04427	1.04877	1.2033	1.87423	2.69353	2.11257	0.543556	0.753459	0.651709	0.667852	1.2079	1.46937	1.71749	1.99571	1.00194	1.45115	1.41304	1.28744	0.889089	0.733719	0.729965	0.639138	1.17764	1.28494	0.719467	0.820798	0.711384	0.93491	0.571965	0.65852	0.83191	0.910796	0.760911	0.698291	0.44581	0.372962	0.731079	0.805636	0.73032	0.823877	0.402037	0.338353	0.494966	0.583579	0.228585
P23141	CES1	Liver carboxylesterase 1 OS=Homo sapiens OX=9606 GN=CES1 PE=1 SV=2	1.0965	0.535367	0.712815	0.67017	0.819889	0.66952	0.863878	1.01677	0.772443	0.822279	0.920634	0.99903	0.872847	0.949474	0.827539	0.982412	1.61844	1.09293	2.0114	1.28538	1.07624	1.06999	1.12709	0.934133	NA	NA	NA	NA	NA	NA	NA	NA	NA	NA	0.930385	0.812928	0.652477	0.638253	0.692507	0.762125	0.710891	0.898631	0.946714	0.845631	NA	NA	NA
P23142	FBLN1	Fibulin-1 OS=Homo sapiens OX=9606 GN=FBLN1 PE=1 SV=4	1.01312	1.01727	0.955879	0.874179	0.922359	0.876302	0.914528	0.917131	0.95277	0.905885	0.89888	1.05409	0.814112	0.955614	1.02363	0.943438	1.35444	1.23191	0.915988	0.901001	1.15245	1.45932	1.21816	1.46927	0.900251	1.11713	0.878735	1.18403	1.12171	1.05497	1.20497	1.41323	1.39243	1.21714	1.23405	1.04131	1.12959	0.826336	0.989725	1.15365	1.21428	1.19897	0.87971	0.846511	0.8923	0.87691	0.665818
P23284	PPIB	Peptidyl-prolyl cis-trans isomerase B OS=Homo sapiens OX=9606 GN=PPIB PE=1 SV=2	0.788728	0.646221	1.40864	0.926717	0.805636	0.796474	0.728651	0.833122	1.49983	0.73545	1.04493	0.949803	0.771747	0.882764	0.685914	0.635912	1.40522	0.688725	0.771533	0.902438	1.01122	1.04319	0.822735	0.841771	0.981935	0.980167	0.752571	0.543669	1.44734	0.699211	0.72855	0.662641	0.865257	1.14607	0.660349	1.37078	1.16062	1.80275	1.06962	1.17919	0.982208	1.64114	1.28815	1.61519	1.28245	1.73748	1.3154
P23381	WARS1	Tryptophan--tRNA ligase, cytoplasmic OS=Homo sapiens OX=9606 GN=WARS1 PE=1 SV=2	1.06186	1.08606	1.03226	1.17993	1.3154	1.75491	1.27059	1.25989	1.37526	0.927423	1.36983	1.77682	1.60536	1.54832	1.36708	1.27828	1.23072	1.18198	0.75132	0.667759	0.99654	0.734381	1.04717	0.591849	NA	NA	NA	NA	NA	NA	NA	NA	NA	NA	1.05438	0.752206	1.44443	0.883499	1.04572	0.811296	0.820514	0.850569	1.07549	0.660486	1.40396	1.0398	1.19823
P23470	PTPRG	Receptor-type tyrosine-protein phosphatase gamma OS=Homo sapiens OX=9606 GN=PTPRG PE=1 SV=4	1.35135	1.06253	1.30026	1.26383	1.41108	1.28815	1.44243	1.48566	0.765832	0.837813	0.92974	1.22434	0.925497	0.857079	1.05892	1.06651	0.789384	0.989382	0.883866	0.858446	0.939783	1.02186	0.842939	1.09376	1.20314	1.18009	1.2089	1.16692	0.944813	1.05929	1.27262	1.1883	1.78336	1.12959	NA	NA	NA	NA	NA	NA	NA	NA	NA	NA	0.756756	0.858387	0.871396
P23528	CFL1	Cofilin-1 OS=Homo sapiens OX=9606 GN=CFL1 PE=1 SV=3	0.951978	0.59613	0.946058	1.18542	0.725577	0.476088	0.587272	0.747114	1.41177	0.717077	0.993506	0.857198	0.817505	0.730067	0.645237	0.596461	1.28949	0.823249	0.735247	0.828515	0.976099	1.25632	0.893847	1.10068	1.50493	1.0284	0.881053	0.738055	1.31658	0.924471	0.862622	1.31558	1.02626	1.01382	0.948882	2.07283	0.997231	2.38469	1.40337	1.22383	1.23765	2.05552	1.504	2.20106	1.27359	1.4062	1.14203
P24043	LAMA2	Laminin subunit alpha-2 OS=Homo sapiens OX=9606 GN=LAMA2 PE=1 SV=4	0.990549	1.19565	1.4798	1.27987	1.09817	1.24582	1.29576	1.08666	NA	NA	NA	NA	NA	NA	NA	NA	NA	NA	NA	NA	NA	NA	NA	NA	NA	NA	NA	NA	NA	NA	NA	NA	NA	NA	NA	NA	NA	NA	NA	NA	NA	NA	NA	NA	NA	NA	NA
P24298	GPT	Alanine aminotransferase 1 OS=Homo sapiens OX=9606 GN=GPT PE=1 SV=3	1.51961	1.14449	1.06844	1.0115	1.16708	1.05241	0.881175	1.03397	NA	NA	NA	NA	NA	NA	NA	NA	1.27165	1.06415	1.61138	1.46125	1.21453	1.0835	0.996748	1.13343	1.29648	1.20882	0.95033	0.852812	1.05526	1.06474	1.48391	1.04369	1.20723	1.17316	0.9705	1.045	1.05322	1.42435	0.839033	1.06091	2.13791	2.17407	1.37535	0.86808	NA	NA	NA
P24592	IGFBP6	Insulin-like growth factor-binding protein 6 OS=Homo sapiens OX=9606 GN=IGFBP6 PE=1 SV=1	1.08478	0.847274	1.08328	1.22298	1.0924	1.09634	1.34845	1.18067	0.728853	0.795923	0.817789	1.19441	1.09847	0.951648	1.75954	1.23842	1.05095	1.18067	1.31358	1.47631	1.13784	1.47642	1.51425	1.56017	1.17821	1.07983	1.47672	1.61922	1.3251	1.34425	1.4709	1.55315	1.42553	1.61855	2.96308	1.03283	2.41078	5.6824	5.49874	2.56152	14.2718	6.10165	1.81579	1.55036	NA	NA	NA
P24593	IGFBP5	Insulin-like growth factor-binding protein 5 OS=Homo sapiens OX=9606 GN=IGFBP5 PE=1 SV=1	0.815751	0.690925	1.20916	0.83001	0.848155	0.631301	0.645058	0.837116	0.728197	0.813661	0.830067	0.952902	0.564404	0.804464	0.651348	0.992542	0.575186	0.630295	0.640469	0.714398	0.580754	0.882153	0.585199	0.854884	1.37088	1.38137	1.18575	1.17487	1.09657	1.06186	1.02321	1.131	1.3218	1.20014	0.792949	0.903941	1.35707	1.14973	1.26313	0.972251	1.20405	0.881602	1.30297	0.810003	1.24384	1.52901	1.8912
P24821	TNC	Tenascin OS=Homo sapiens OX=9606 GN=TNC PE=1 SV=3	0.962528	0.847509	1.50556	1.26953	1.05981	1.33858	1.70965	0.952176	1.24643	1.0471	0.865017	1.39214	0.801792	0.980575	0.973127	1.0344	1.17056	0.900314	1.17903	1.53092	1.0657	1.15125	1.02897	0.9531	0.64345	0.884847	1.63864	0.893228	1.17862	0.821538	1.55488	0.857911	1.2511	0.84113	0.725929	0.642158	0.926331	0.679008	0.384112	0.94442	0.675393	0.767639	0.726029	0.614847	1.44734	1.00877	1.15157
P24844	MYL9	Myosin regulatory light polypeptide 9 OS=Homo sapiens OX=9606 GN=MYL9 PE=1 SV=4	NA	NA	NA	NA	NA	NA	NA	NA	1.27015	0.781382	0.790918	0.909219	1.12756	0.744219	0.529903	0.419168	1.13438	0.766576	0.660944	0.6862	0.864597	1.28076	0.773086	1.22688	1.00118	0.989108	1.04254	0.616683	1.16296	0.597993	0.809611	0.605542	0.992611	1.10229	0.887981	1.78547	1.33719	3.02828	1.12763	1.48267	1.41598	2.26577	1.78584	3.02241	2.25934	2.2749	2.17845
P25311	AZGP1	Zinc-alpha-2-glycoprotein OS=Homo sapiens OX=9606 GN=AZGP1 PE=1 SV=2	1.17422	1.09482	1.15117	1.56613	1.40786	1.42682	1.47029	1.33524	0.882275	1.10957	1.04275	0.957271	1.24617	1.29182	1.12475	1.66129	1.17674	1.42563	1.3853	1.44223	1.35905	1.28556	1.29729	1.45569	1.3506	1.23928	1.72178	1.38223	1.15958	1.41932	1.20664	1.21672	1.26208	1.24703	0.545556	0.457708	0.558256	0.459456	0.398541	0.369437	0.407141	0.348879	0.336855	0.315279	0.28326	0.283221	0.283516
P25774	CTSS	Cathepsin S OS=Homo sapiens OX=9606 GN=CTSS PE=1 SV=3	NA	NA	NA	NA	NA	NA	NA	NA	NA	NA	NA	NA	NA	NA	NA	NA	NA	NA	NA	NA	NA	NA	NA	NA	1.45357	1.73712	1.0853	1.24876	0.824391	1.07684	1.2626	1.72907	1.2804	1.6218	NA	NA	NA	NA	NA	NA	NA	NA	NA	NA	1.30749	0.8461	1.12062
P25786	PSMA1	Proteasome subunit alpha type-1 OS=Homo sapiens OX=9606 GN=PSMA1 PE=1 SV=1	1.52414	1.01354	1.04681	1.12194	1.53262	3.01509	1.53634	1.42425	0.858982	0.958134	0.859399	1.00459	1.07639	1.04783	0.865197	1.39194	1.54189	1.49973	2.06465	1.7268	1.12373	1.08998	1.48586	0.991098	0.860174	0.706421	1.67296	1.08028	1.14957	1.04001	0.946648	0.794159	0.989245	0.652206	0.829147	0.636971	1.10023	0.7829	0.826278	0.592259	1.0385	0.806642	0.722816	0.542765	0.858744	0.633273	0.893723
P25787	PSMA2	Proteasome subunit alpha type-2 OS=Homo sapiens OX=9606 GN=PSMA2 PE=1 SV=2	NA	NA	NA	NA	NA	NA	NA	NA	NA	NA	NA	NA	NA	NA	NA	NA	1.09779	1.00507	1.17666	1.12521	1.05446	1.18304	1.14219	0.913198	1.22485	1.01445	1.26953	1.02569	0.988286	1.23038	1.44904	1.17235	1.22884	1.12397	NA	NA	NA	NA	NA	NA	NA	NA	NA	NA	NA	NA	NA
P25788	PSMA3	Proteasome subunit alpha type-3 OS=Homo sapiens OX=9606 GN=PSMA3 PE=1 SV=2	1.46734	1.13438	1.05658	1.23004	1.46256	2.58184	1.39204	1.41225	0.603029	0.826565	0.693035	0.646176	1.24954	0.906765	0.904944	1.46785	1.35491	1.25989	1.92319	1.58381	0.937311	0.778787	1.25884	0.785564	0.799406	0.544536	2.03101	0.564874	0.910922	0.742931	0.627375	0.552099	0.455587	0.381776	0.950725	0.663055	1.02569	0.898506	1.2079	0.750696	0.964197	1.22493	1.17985	0.416244	NA	NA	NA
P25789	PSMA4	Proteasome subunit alpha type-4 OS=Homo sapiens OX=9606 GN=PSMA4 PE=1 SV=1	1.264	0.910102	0.961328	0.926139	1.24022	1.8035	1.15557	1.01108	0.841654	0.87436	0.758226	0.943962	1.18067	1.17422	0.970231	1.50077	1.48175	1.29092	2.04443	1.85215	1.22019	0.844694	1.32042	0.712914	0.925753	0.547526	1.85806	0.740309	1.01748	0.868562	0.875149	0.732703	0.695827	0.545065	NA	NA	NA	NA	NA	NA	NA	NA	NA	NA	NA	NA	NA
P26022	PTX3	Pentraxin-related protein PTX3 OS=Homo sapiens OX=9606 GN=PTX3 PE=1 SV=3	0.801625	0.761439	1.64501	1.14703	1.65657	1.3705	1.75686	0.978131	NA	NA	NA	NA	NA	NA	NA	NA	0.73596	0.809891	1.9621	1.09104	0.751893	0.609966	2.06351	0.704026	NA	NA	NA	NA	NA	NA	NA	NA	NA	NA	NA	NA	NA	NA	NA	NA	NA	NA	NA	NA	NA	NA	NA
P26038	MSN	Moesin OS=Homo sapiens OX=9606 GN=MSN PE=1 SV=3	0.885154	0.827539	0.90463	1.00347	1.07363	1.10634	0.752989	1.07453	1.13391	0.786817	1.07438	0.958865	0.915734	0.780895	0.849567	0.850333	1.32942	1.02165	0.814112	0.775662	0.862024	0.910039	0.818129	0.808825	1.25815	0.757753	0.824734	0.986506	1.04283	0.961727	0.698097	0.848214	0.691835	1.13958	0.937831	1.36993	0.862622	1.54467	1.27553	0.996955	0.988765	1.41529	1.1674	1.60692	1.1628	1.40756	1.32161
P26447	S100A4	Protein S100-A4 OS=Homo sapiens OX=9606 GN=S100A4 PE=1 SV=1	0.936921	0.856901	1.10581	2.28137	0.762865	0.688296	0.618266	0.614166	1.20522	0.958201	1.00014	0.670589	0.828343	0.768704	0.598283	1.43018	1.18896	0.859995	0.620843	0.778247	1.04652	1.00278	0.591397	0.59378	1.59262	0.919614	0.67017	0.562763	1.02292	0.801459	0.542991	1.0203	0.542164	0.950989	1.00744	1.71618	0.973532	1.85935	1.90369	1.3491	0.837116	1.8533	1.43764	2.75185	1.00723	1.83821	1.1916
P26572	MGAT1	Alpha-1,3-mannosyl-glycoprotein 2-beta-N-acetylglucosaminyltransferase OS=Homo sapiens OX=9606 GN=MGAT1 PE=1 SV=2	1.69619	0.980235	1.55941	2.31578	2.60359	2.54453	2.71095	1.4651	1.21942	0.944092	0.877639	1.57265	1.06076	1.34071	1.14203	1.00682	1.07304	0.633756	0.517812	0.919869	1.28601	1.07811	1.43356	0.980575	0.58976	0.602027	1.33219	0.91694	1.02541	0.658886	0.844342	0.438272	0.919295	0.644611	1.21108	1.1708	2.42318	1.16756	1.15805	1.42405	1.49879	1.58414	0.849273	1.01248	1.39745	0.757806	1.93388
P26927	MST1	Hepatocyte growth factor-like protein OS=Homo sapiens OX=9606 GN=MST1 PE=1 SV=2	1.1959	1.03311	1.4288	1.60092	1.16821	1.20055	1.28833	1.1452	1.01967	0.967813	1.10903	1.02876	0.893228	1.27165	1.23345	0.946779	1.193	1.05629	1.04797	1.09574	1.24393	1.19731	1.20916	1.19127	1.17821	1.28138	1.16627	1.12693	1.10581	1.09954	1.29567	1.22408	1.17878	1.08508	1.0796	0.808433	0.948224	0.708039	0.880991	0.778301	1.0612	0.91048	0.795757	0.636795	1.3668	1.16441	1.17813
P27169	PON1	Serum paraoxonase/arylesterase 1 OS=Homo sapiens OX=9606 GN=PON1 PE=1 SV=3	0.646042	0.488185	0.578184	0.550418	0.973599	0.76977	0.722615	0.583175	1.04943	0.949474	0.794765	1.09992	0.684537	1.01284	0.691068	0.868742	0.705296	0.796088	0.640558	0.772871	0.776577	0.928131	1.00737	1.34397	0.779597	1.31549	0.859518	0.676377	1.07296	1.02215	0.817222	0.728247	1.32602	1.12506	0.992267	1.28574	1.01038	1.11899	0.936142	1.67018	0.962795	1.36936	1.21985	1.46958	0.84998	1.66417	1.22654
P27348	YWHAQ	14-3-3 protein theta OS=Homo sapiens OX=9606 GN=YWHAQ PE=1 SV=1	0.940891	0.833584	0.979964	1.29316	1.1299	0.926845	0.995574	1.12943	NA	NA	NA	NA	NA	NA	NA	NA	0.943765	0.726331	0.659388	0.683588	0.80374	0.870008	0.679102	0.898942	0.801348	1.0814	0.856841	1.11907	1.18723	0.901625	1.11173	0.867779	0.66485	0.550533	0.754818	0.95244	0.969491	0.978335	1.54071	1.61664	0.886996	0.977725	1.07356	1.28174	0.899877	1.00786	1.31103
P27487	DPP4	Dipeptidyl peptidase 4 OS=Homo sapiens OX=9606 GN=DPP4 PE=1 SV=2	NA	NA	NA	NA	NA	NA	NA	NA	0.685914	0.688582	0.61357	0.765673	0.673663	0.64986	0.690254	0.826164	0.780354	0.840663	0.820173	0.84745	0.628028	0.661311	0.613485	0.70794	0.987532	0.965334	0.827769	0.723518	0.946189	1.08155	0.846159	0.931418	0.92646	1.09179	NA	NA	NA	NA	NA	NA	NA	NA	NA	NA	1.0549	1.25553	1.55574
P27797	CALR	Calreticulin OS=Homo sapiens OX=9606 GN=CALR PE=1 SV=1	1.07311	0.674177	1.06518	1.97452	1.42741	1.9099	1.82893	1.25571	1.29244	0.908715	0.858208	1.11404	0.958732	1.01649	0.752728	0.614379	1.09604	0.890816	0.901625	0.938546	0.930966	0.965869	1.17927	1.00347	0.862084	0.751529	1.51729	0.927552	1.0487	0.676096	0.758279	0.488016	0.735552	0.612423	0.807089	1.46978	1.11435	1.77769	1.43973	1.67342	0.935818	1.59405	1.30297	1.80826	1.07535	1.3084	1.18542
P27918	CFP	Properdin OS=Homo sapiens OX=9606 GN=CFP PE=1 SV=2	1.21951	1.22417	1.22485	1.09073	1.20656	1.18797	1.02215	1.07594	1.20339	1.34313	1.09399	0.939653	1.19541	1.32354	1.29199	1.0203	1.27174	1.27509	1.03929	1.15029	1.40961	1.81127	1.71665	2.16775	1.56645	1.6416	1.44273	1.73797	1.26707	1.60447	1.32556	1.34938	1.48175	1.70823	0.477641	0.413712	0.426258	0.430325	0.486058	0.499515	0.498512	0.529279	0.368133	0.445933	0.691404	0.5208	0.583013
P27930	IL1R2	Interleukin-1 receptor type 2 OS=Homo sapiens OX=9606 GN=IL1R2 PE=1 SV=1	2.33901	1.56146	1.25876	1.21428	1.37097	1.12373	1.15902	1.19764	3.6258	1.38041	2.41781	0.879771	1.00884	0.816995	0.712371	1.49734	1.35896	1.41196	1.61653	1.1456	0.518315	0.422522	0.432478	0.385499	NA	NA	NA	NA	NA	NA	NA	NA	NA	NA	NA	NA	NA	NA	NA	NA	NA	NA	NA	NA	NA	NA	NA
P28062	PSMB8	Proteasome subunit beta type-8 OS=Homo sapiens OX=9606 GN=PSMB8 PE=1 SV=3	1.41942	1.42129	1.29999	1.07326	0.95973	1.02399	0.924407	1.47019	NA	NA	NA	NA	NA	NA	NA	NA	0.847215	1.28869	1.23765	1.10849	0.950659	0.696551	0.939002	0.718271	NA	NA	NA	NA	NA	NA	NA	NA	NA	NA	NA	NA	NA	NA	NA	NA	NA	NA	NA	NA	NA	NA	NA
P28065	PSMB9	Proteasome subunit beta type-9 OS=Homo sapiens OX=9606 GN=PSMB9 PE=1 SV=2	NA	NA	NA	NA	NA	NA	NA	NA	NA	NA	NA	NA	NA	NA	NA	NA	1.0823	1.17846	1.27341	1.13147	0.833353	0.663147	1.1332	0.638651	NA	NA	NA	NA	NA	NA	NA	NA	NA	NA	NA	NA	NA	NA	NA	NA	NA	NA	NA	NA	NA	NA	NA
P28066	PSMA5	Proteasome subunit alpha type-5 OS=Homo sapiens OX=9606 GN=PSMA5 PE=1 SV=3	1.26181	1.1098	0.927681	0.792015	1.5389	2.1177	1.17007	1.03025	0.930708	1.00069	1.03011	1.10496	1.37955	1.29774	1.1969	1.36434	1.60192	1.54778	2.48716	2.19512	1.1369	1.02662	1.90316	0.918977	NA	NA	NA	NA	NA	NA	NA	NA	NA	NA	0.63244	0.653337	0.759067	0.639981	0.698775	0.612168	0.730674	0.700521	0.644253	0.657882	0.97942	1.13524	1.11713
P28070	PSMB4	Proteasome subunit beta type-4 OS=Homo sapiens OX=9606 GN=PSMB4 PE=1 SV=4	1.17772	1.23902	1.28985	1.07631	1.25388	2.29072	1.35341	1.24998	0.719217	0.903753	0.830643	0.99654	1.2179	1.06106	1.16223	1.32235	1.35313	1.41128	1.74993	1.46724	0.952704	0.632703	1.3931	0.592505	NA	NA	NA	NA	NA	NA	NA	NA	NA	NA	1.04189	0.645908	0.752415	0.561789	0.713903	0.542502	0.716332	0.578865	0.622739	0.569868	0.844811	0.65811	0.84839
P28072	PSMB6	Proteasome subunit beta type-6 OS=Homo sapiens OX=9606 GN=PSMB6 PE=1 SV=4	1.26655	1.15277	1.07007	1.04913	1.33432	1.76418	1.28271	1.40766	0.728197	0.873876	0.992886	1.04746	1.0242	1.02285	0.983025	1.30053	1.30731	1.28512	1.86296	1.63297	0.951318	0.754661	1.14258	0.890323	NA	NA	NA	NA	NA	NA	NA	NA	NA	NA	0.924215	0.627419	0.98357	0.781057	0.805915	0.778841	0.774104	0.770037	0.93368	0.733618	NA	NA	NA
P28827	PTPRM	Receptor-type tyrosine-protein phosphatase mu OS=Homo sapiens OX=9606 GN=PTPRM PE=1 SV=2	NA	NA	NA	NA	NA	NA	NA	NA	NA	NA	NA	NA	NA	NA	NA	NA	NA	NA	NA	NA	NA	NA	NA	NA	NA	NA	NA	NA	NA	NA	NA	NA	NA	NA	NA	1.0746	0.809274	0.872121	1.48947	1.35576	1.33682	1.20147	1.1487	0.87971	NA	NA	NA
P28838	LAP3	Cytosol aminopeptidase OS=Homo sapiens OX=9606 GN=LAP3 PE=1 SV=3	NA	NA	NA	NA	NA	NA	NA	NA	NA	NA	NA	NA	NA	NA	NA	NA	1.75832	1.02712	1.57811	1.14894	1.08975	0.987669	1.15741	1.03807	NA	NA	NA	NA	NA	NA	NA	NA	NA	NA	NA	NA	NA	NA	NA	NA	NA	NA	NA	NA	NA	NA	NA
P29350	PTPN6	Tyrosine-protein phosphatase non-receptor type 6 OS=Homo sapiens OX=9606 GN=PTPN6 PE=1 SV=1	NA	NA	NA	NA	NA	NA	NA	NA	NA	NA	NA	NA	NA	NA	NA	NA	NA	NA	NA	NA	NA	NA	NA	NA	NA	NA	NA	NA	NA	NA	NA	NA	NA	NA	0.321146	1.52975	0.608108	1.82918	0.566835	0.796364	0.696695	1.44944	1.0511	1.77325	1.28735	2.23892	0.998961
P29401	TKT	Transketolase OS=Homo sapiens OX=9606 GN=TKT PE=1 SV=3	1.15837	0.866637	0.978674	0.961661	1.70126	1.95396	0.959264	1.25902	1.20773	0.990824	1.11042	1.32758	1.13564	1.09384	0.97847	1.56884	1.41	1.32345	1.30288	0.952836	0.840372	0.716481	0.894777	0.66762	0.933874	0.82245	0.714448	0.628245	0.799129	0.897013	0.893661	0.822621	0.836478	0.948224	0.804631	0.911364	0.84329	0.88148	0.941609	0.723167	0.815864	0.850628	0.798077	0.837	0.94875	0.90903	0.994263
P29622	SERPINA4	Kallistatin OS=Homo sapiens OX=9606 GN=SERPINA4 PE=1 SV=3	0.732652	0.507965	0.553172	0.653609	0.679337	0.582286	0.632659	0.551908	0.940044	1.14981	0.973802	0.763712	0.787035	0.848331	0.667482	1.28316	0.5923	0.675113	0.811521	1.06481	0.579387	0.917258	0.626984	1.07684	1.29945	1.35566	0.944027	0.93504	0.936532	1.24384	0.867058	1.05848	1.22052	1.34667	1.30812	1.41157	1.13729	1.49019	1.07796	1.47264	1.10061	1.33737	1.10581	1.37487	0.874482	1.27721	1.27704
P30041	PRDX6	Peroxiredoxin-6 OS=Homo sapiens OX=9606 GN=PRDX6 PE=1 SV=3	1.49723	1.27086	2.33529	5.09436	1.42158	1.11165	0.78933	0.801403	1.14163	1.10611	1.10512	1.13359	0.90689	0.924663	1.00257	1.43316	1.75406	1.21909	1.25249	1.38521	1.4964	1.60503	1.39542	1.40991	1.30468	0.860949	0.966472	0.973802	1.21909	0.79196	1.02555	1.31677	0.744116	0.978267	0.527119	0.994057	1.2043	1.38223	0.67849	0.872363	0.569315	0.895894	1.05738	0.928066	1.23713	1.66786	1.47458
P30043	BLVRB	Flavin reductase (NADPH) OS=Homo sapiens OX=9606 GN=BLVRB PE=1 SV=3	1.26392	1.19864	1.26042	2.3256	1.17089	0.942785	2.01601	1.7708	0.620714	0.868622	0.745045	0.665541	0.825077	0.76929	0.67273	0.890816	0.554016	0.939067	0.793224	1.12959	0.754451	1.67191	0.986301	1.68845	0.585483	0.708775	0.548704	0.814846	0.833353	1.00856	1.20305	0.852044	1.06223	0.722816	NA	NA	NA	NA	NA	NA	NA	NA	NA	NA	0.649544	0.546806	0.681176
P30046	DDT	D-dopachrome decarboxylase OS=Homo sapiens OX=9606 GN=DDT PE=1 SV=3	1.15413	1.07908	1.28325	1.81919	1.29244	1.15837	1.04232	1.20514	0.663469	0.845455	0.638341	0.976844	0.911175	0.811015	1.23919	1.45025	1.95966	1.37545	1.60003	0.813661	0.880564	0.88632	1.65187	0.79482	0.906765	0.689537	0.755603	0.799572	0.812196	0.663745	1.52637	1.17731	0.78649	0.670821	NA	NA	NA	NA	NA	NA	NA	NA	NA	NA	NA	NA	NA
P30086	PEBP1	Phosphatidylethanolamine-binding protein 1 OS=Homo sapiens OX=9606 GN=PEBP1 PE=1 SV=3	0.603238	0.597661	0.930966	1.57385	0.663653	0.547033	0.534477	1.30441	1.07192	0.797966	1.37993	1.43575	0.608361	0.652794	0.71658	0.767267	NA	NA	NA	NA	NA	NA	NA	NA	NA	NA	NA	NA	NA	NA	NA	NA	NA	NA	0.923062	1.09005	0.739796	1.52119	1.07729	0.787745	0.677597	1.0025	0.885092	1.32492	1.30261	1.59218	1.46774
P30101	PDIA3	Protein disulfide-isomerase A3 OS=Homo sapiens OX=9606 GN=PDIA3 PE=1 SV=4	1.15821	0.857911	1.13367	1.1414	1.20164	0.986438	1.08328	1.41843	1.41323	0.742776	0.803628	1.13226	0.865257	1.01875	0.99268	1.06962	1.38367	0.909976	0.974139	1.12233	1.04877	1.27792	1.24177	1.15613	0.791466	1.01213	0.820059	0.676049	1.49983	0.713606	1.34602	1.47601	1.33774	0.899129	0.880869	1.82475	1.25197	1.92666	1.01903	1.37164	1.27695	2.33189	1.74557	2.12196	1.78856	1.6659	1.52098
P30740	SERPINB1	Leukocyte elastase inhibitor OS=Homo sapiens OX=9606 GN=SERPINB1 PE=1 SV=1	0.91187	0.9531	1.1475	1.15637	1.36084	1.43953	1.01797	1.09134	1.13966	0.781436	1.02662	1.12031	1.04384	1.10757	1.00166	1.40318	0.871215	0.783226	0.669196	0.763394	0.78933	0.859518	0.99737	0.797192	1.37421	1.03218	1.23038	1.03047	1.12373	1.05922	1.1267	1.08598	0.922423	1.05132	0.86334	1.62293	1.16054	1.80063	1.21993	1.00139	0.728954	1.10389	1.26295	1.62237	0.975153	1.27828	1.12459
P31146	CORO1A	Coronin-1A OS=Homo sapiens OX=9606 GN=CORO1A PE=1 SV=4	0.942327	0.544499	0.825248	1.28112	0.798907	0.926139	0.718321	0.792509	1.55283	0.786435	0.797635	1.12311	0.643539	0.729106	0.457201	0.876849	NA	NA	NA	NA	NA	NA	NA	NA	0.57264	0.706274	0.947304	0.413971	1.24876	0.617581	0.732957	0.422347	0.801236	0.649409	0.772068	1.66152	0.699066	1.75796	0.657152	0.69684	0.952044	1.71392	1.31385	1.87735	1.22188	2.05751	1.17406
P31327	CPS1	Carbamoyl-phosphate synthase [ammonia], mitochondrial OS=Homo sapiens OX=9606 GN=CPS1 PE=1 SV=2	2.2719	0.726483	1.22188	0.787745	1.02783	0.642425	0.739437	0.713903	NA	NA	NA	NA	NA	NA	NA	NA	2.08667	0.974612	1.97726	1.19773	0.828802	0.884295	0.928131	0.842238	NA	NA	NA	NA	NA	NA	NA	NA	NA	NA	NA	NA	NA	NA	NA	NA	NA	NA	NA	NA	NA	NA	NA
P31946	YWHAB	14-3-3 protein beta/alpha OS=Homo sapiens OX=9606 GN=YWHAB PE=1 SV=3	0.817222	0.694574	1.03792	1.58733	0.891743	0.761967	0.611066	1.02243	1.13469	0.903815	1.1032	1.01073	0.976573	0.994608	0.911301	0.889212	1.22247	0.976302	0.982684	1.16651	1.01903	1.07445	1.02463	1.06039	1.49755	1.09498	1.09672	1.25545	1.13288	1.0511	1.06866	1.41706	1.09187	1.32979	NA	NA	NA	NA	NA	NA	NA	NA	NA	NA	1.0416	1.97698	1.51362
P31947	SFN	14-3-3 protein sigma OS=Homo sapiens OX=9606 GN=SFN PE=1 SV=1	NA	NA	NA	NA	NA	NA	NA	NA	1.01354	0.802404	0.916686	0.974477	0.84288	0.70427	0.693948	0.635736	1.41108	0.855299	0.752206	0.742262	0.875391	0.922295	0.70193	0.617153	1.11203	0.66232	0.967477	0.830297	1.09422	0.771587	0.645371	0.957802	0.58593	1.14703	1.09619	1.46034	1.33821	1.35407	1.22129	1.40659	1.22027	1.33062	1.65164	1.1591	1.05614	1.45166	1.13312
P32119	PRDX2	Peroxiredoxin-2 OS=Homo sapiens OX=9606 GN=PRDX2 PE=1 SV=5	0.958267	1.03656	1.70279	3.96852	1.03807	1.16797	0.80107	1.00542	0.593739	1.34966	0.831392	0.886505	0.765248	0.894653	0.706666	2.32044	0.698969	1.06415	0.688105	0.988354	1.00779	0.810284	0.798575	0.601985	1.12732	1.01445	0.868562	0.892361	0.803628	0.870611	0.777169	1.13587	0.741696	0.763976	1.28032	0.68231	1.02562	0.53296	1.01981	1.01038	0.787854	0.857435	0.693467	0.684442	0.753302	0.690302	1.05592
P32519	ELF1	ETS-related transcription factor Elf-1 OS=Homo sapiens OX=9606 GN=ELF1 PE=1 SV=2	0.707548	0.845748	0.694526	0.728247	0.816429	0.88675	0.899129	0.883621	NA	NA	NA	NA	NA	NA	NA	NA	NA	NA	NA	NA	NA	NA	NA	NA	1.90145	1.99654	0.737543	0.917322	0.79769	1.08222	0.412967	0.999723	2.01279	1.82311	NA	NA	NA	NA	NA	NA	NA	NA	NA	NA	NA	NA	NA
P32754	HPD	4-hydroxyphenylpyruvate dioxygenase OS=Homo sapiens OX=9606 GN=HPD PE=1 SV=2	NA	NA	NA	NA	NA	NA	NA	NA	0.312646	0.336179	0.3431	0.394774	0.391369	0.489303	0.518279	1.18509	1.21765	0.875149	1.35576	1.28735	1.00842	0.8791	0.884111	0.80625	0.6843	0.669103	0.876302	0.713112	0.823877	0.875027	1.20639	0.671891	0.812534	0.566442	NA	NA	NA	NA	NA	NA	NA	NA	NA	NA	NA	NA	NA
P33151	CDH5	Cadherin-5 OS=Homo sapiens OX=9606 GN=CDH5 PE=1 SV=5	0.901063	0.979692	1.02783	0.912439	0.98514	0.83168	0.834799	0.861486	0.952572	0.941609	0.965802	1.03283	1.0041	1.05768	1.11636	1.00229	0.977318	1.06784	0.866998	0.80207	0.944878	0.777816	0.967209	0.716779	1.01917	1.42949	0.934198	1.11242	0.827654	0.87327	1.05212	0.978809	1.29711	1.47243	1.20197	1.21083	1.1704	1.02968	1.05227	1.34723	0.990274	0.991442	1.0018	1.11065	1.07609	1.35999	0.989519
P33908	MAN1A1	Mannosyl-oligosaccharide 1,2-alpha-mannosidase IA OS=Homo sapiens OX=9606 GN=MAN1A1 PE=1 SV=3	0.919614	0.879649	1.42346	1.18419	1.39156	1.31869	1.43853	1.56363	1.01234	0.953166	1.00083	1.57418	1.04638	1.46551	1.20164	1.13603	0.896826	0.862203	0.894281	0.993299	1.16578	0.889891	1.14338	0.95244	0.685962	1.05555	1.275	0.804631	0.899628	0.741953	1.34901	0.798409	1.0927	0.654425	0.974342	0.85169	1.34034	0.931611	0.786708	0.879832	1.12054	0.958002	0.932386	0.730168	1.45125	1.11907	1.18657
P34096	RNASE4	Ribonuclease 4 OS=Homo sapiens OX=9606 GN=RNASE4 PE=1 SV=3	1.19441	1.13288	1.31339	1.11504	1.47775	1.13603	1.55811	1.1959	NA	NA	NA	NA	NA	NA	NA	NA	0.715092	0.856366	1.21689	1.3763	1.2928	1.31039	1.04754	1.11119	NA	NA	NA	NA	NA	NA	NA	NA	NA	NA	1.07096	1.08103	0.993368	0.83191	1.42929	0.845631	1.52066	0.953497	1.85729	0.594109	NA	NA	NA
P34913	EPHX2	Bifunctional epoxide hydrolase 2 OS=Homo sapiens OX=9606 GN=EPHX2 PE=1 SV=2	NA	NA	NA	NA	NA	NA	NA	NA	NA	NA	NA	NA	NA	NA	NA	NA	1.36917	0.980915	1.16417	1.16926	1.0841	1.02861	0.97124	1.19889	NA	NA	NA	NA	NA	NA	NA	NA	NA	NA	NA	NA	NA	NA	NA	NA	NA	NA	NA	NA	NA	NA	NA
P35247	SFTPD	Pulmonary surfactant-associated protein D OS=Homo sapiens OX=9606 GN=SFTPD PE=1 SV=3	1.0503	1.37392	1.46236	1.40708	1.19243	1.41775	1.28735	1.07527	NA	NA	NA	NA	NA	NA	NA	NA	NA	NA	NA	NA	NA	NA	NA	NA	NA	NA	NA	NA	NA	NA	NA	NA	NA	NA	NA	NA	NA	NA	NA	NA	NA	NA	NA	NA	NA	NA	NA
P35443	THBS4	Thrombospondin-4 OS=Homo sapiens OX=9606 GN=THBS4 PE=1 SV=2	NA	NA	NA	NA	NA	NA	NA	NA	1.22731	0.763077	0.690637	1.15509	0.634503	1.10558	0.756966	0.57991	NA	NA	NA	NA	NA	NA	NA	NA	0.614421	0.864717	0.658794	0.831103	0.841713	0.843933	0.906953	0.981119	1.08282	1.26936	NA	NA	NA	NA	NA	NA	NA	NA	NA	NA	1.06083	1.24005	1.01417
P35520	CBS	Cystathionine beta-synthase OS=Homo sapiens OX=9606 GN=CBS PE=1 SV=2	NA	NA	NA	NA	NA	NA	NA	NA	NA	NA	NA	NA	NA	NA	NA	NA	1.70137	0.929418	1.31622	1.32235	1.02349	0.950461	0.944682	0.824905	NA	NA	NA	NA	NA	NA	NA	NA	NA	NA	NA	NA	NA	NA	NA	NA	NA	NA	NA	NA	NA	NA	NA
P35527	KRT9	Keratin, type I cytoskeletal 9 OS=Homo sapiens OX=9606 GN=KRT9 PE=1 SV=3	0.653428	2.13376	0.691452	0.889767	0.890631	0.656106	0.605626	0.799738	0.816316	0.960994	0.470772	0.824105	0.590824	0.721214	0.36516	0.588576	0.48832	0.342696	0.354191	0.289453	0.367674	0.256157	0.317582	0.325448	0.721264	1.11481	0.361784	0.681365	0.532849	0.501076	0.675955	0.547944	0.48063	0.952308	0.891187	0.545405	0.282202	0.253771	0.323379	0.502885	0.9705	0.455114	0.53119	1.18591	0.599986	0.363292	0.363821
P35542	SAA4	Serum amyloid A-4 protein OS=Homo sapiens OX=9606 GN=SAA4 PE=1 SV=2	0.962928	0.641402	0.830355	0.858804	1.26681	1.07445	1.18444	0.806362	1.21377	1.01417	1.15685	1.17658	1.10849	1.29819	1.0357	0.92089	0.880625	1.13587	1.04333	1.08862	0.848214	0.927231	1.09901	1.22586	0.934781	0.931159	0.916115	0.91955	1.0814	1.04645	1.15717	1.06025	1.26339	1.17895	1.25188	0.787253	1.4711	0.747891	1.50306	1.03354	1.74303	1.14472	1.39697	0.761492	2.21852	1.15757	1.68833
P35555	FBN1	Fibrillin-1 OS=Homo sapiens OX=9606 GN=FBN1 PE=1 SV=4	1.10267	1.48052	1.92292	1.83579	1.50901	1.61743	1.93268	1.88296	1.16934	1.12179	1.4837	1.51204	0.933551	1.06157	1.47529	1.17862	1.68974	1.66359	1.36907	1.14607	1.03562	1.03965	1.46866	1.08147	NA	NA	NA	NA	NA	NA	NA	NA	NA	NA	NA	NA	NA	NA	NA	NA	NA	NA	NA	NA	NA	NA	NA
P35579	MYH9	Myosin-9 OS=Homo sapiens OX=9606 GN=MYH9 PE=1 SV=4	NA	NA	NA	NA	NA	NA	NA	NA	NA	NA	NA	NA	NA	NA	NA	NA	1.39397	1.24824	1.08817	1.13328	1.42296	1.33339	1.26786	1.14615	NA	NA	NA	NA	NA	NA	NA	NA	NA	NA	0.878187	1.71428	1.08065	1.89658	1.12865	1.21403	1.40415	2.10672	1.16772	2.0223	NA	NA	NA
P35858	IGFALS	Insulin-like growth factor-binding protein complex acid labile subunit OS=Homo sapiens OX=9606 GN=IGFALS PE=1 SV=1	0.789275	0.598076	0.907268	0.728954	1.16934	0.908589	0.913768	0.741696	0.699599	0.766735	0.740412	0.910733	0.626072	0.94829	0.71529	0.840023	0.846511	0.791082	0.68968	0.830758	0.675534	0.867539	0.646176	0.960928	1.32915	1.88309	0.858268	0.860412	0.971846	0.95621	0.699357	0.757281	1.61105	1.42198	1.05665	1.25553	1.29999	1.46622	1.45286	1.77892	1.29594	1.46693	1.48648	1.61866	1.24367	1.52795	1.47131
P35908	KRT2	Keratin, type II cytoskeletal 2 epidermal OS=Homo sapiens OX=9606 GN=KRT2 PE=1 SV=2	0.638253	0.614336	0.53296	0.507789	0.606887	0.459138	0.433138	0.57268	NA	NA	NA	NA	NA	NA	NA	NA	0.296191	0.321368	0.351233	0.42396	0.394665	0.359459	0.825077	0.384405	0.464613	0.503094	0.338564	0.406859	0.430146	0.317406	0.552827	0.422318	0.345774	1.58975	0.250191	0.510258	0.252473	0.366783	0.327894	0.246763	0.428837	0.322015	0.62343	0.752989	NA	NA	NA
P35916	FLT4	Vascular endothelial growth factor receptor 3 OS=Homo sapiens OX=9606 GN=FLT4 PE=1 SV=3	0.958666	1.15301	1.65749	1.07021	1.06688	1.36898	1.43824	1.09885	1.24807	0.991442	1.1135	1.55466	0.986643	1.42959	1.25666	1.16837	1.51089	1.34826	0.697517	0.69684	0.651709	0.714002	0.738515	0.841771	2.02595	1.68751	1.02676	1.38194	1.04088	1.23679	1.57516	1.63309	1.65107	1.74557	1.20447	1.05358	1.11365	0.947436	0.901063	0.975355	1.02392	1.16506	1.16643	0.815016	NA	NA	NA
P36222	CHI3L1	Chitinase-3-like protein 1 OS=Homo sapiens OX=9606 GN=CHI3L1 PE=1 SV=2	0.818866	0.869043	1.41128	1.36405	1.15589	1.15958	2.60142	2.65958	NA	NA	NA	NA	NA	NA	NA	NA	0.516557	0.638253	0.78769	0.579468	0.84078	0.896329	2.06924	0.887673	NA	NA	NA	NA	NA	NA	NA	NA	NA	NA	NA	NA	NA	NA	NA	NA	NA	NA	NA	NA	NA	NA	NA
P36955	SERPINF1	Pigment epithelium-derived factor OS=Homo sapiens OX=9606 GN=SERPINF1 PE=1 SV=4	0.775985	0.846511	1.00633	0.951186	0.948684	0.885522	0.889212	0.718321	0.824276	0.82114	0.937116	1.04587	0.902501	1.09036	1.0587	1.04536	0.835493	0.98719	0.92871	0.895149	0.968954	0.950857	1.13163	1.2735	0.961527	1.09748	1.24358	1.20055	0.894901	1.00556	1.06223	1.13037	1.10428	1.18173	1.51016	1.16506	1.50483	1.18107	1.01192	1.07453	1.11791	0.976099	0.971307	1.08298	1.12194	1.28209	1.19433
P36980	CFHR2	Complement factor H-related protein 2 OS=Homo sapiens OX=9606 GN=CFHR2 PE=1 SV=1	1.62057	1.81579	2.04855	1.60748	1.91414	2.16055	1.91693	1.60871	0.763447	0.807649	0.755341	0.98719	0.855417	1.06829	0.91675	0.877092	0.787144	0.902251	0.789166	0.807033	1.26769	1.0814	0.929612	0.918977	0.984457	0.919805	1.17324	1.19284	0.873876	0.92319	1.09414	0.953365	0.70305	0.635604	1.31777	0.822393	1.7681	1.193	0.754138	0.725677	1.16975	0.715141	0.814395	0.789111	0.273592	0.164858	0.165167
P37802	TAGLN2	Transgelin-2 OS=Homo sapiens OX=9606 GN=TAGLN2 PE=1 SV=3	1.02576	0.294329	0.620069	0.690254	0.477244	0.329786	0.370103	0.300867	1.7804	0.652523	0.66099	0.814056	0.520006	0.677034	0.450001	0.440923	1.56721	0.672917	0.762971	0.974207	1.04892	1.34929	0.890569	1.15501	0.584146	0.970298	0.722565	0.584308	1.55984	0.614933	0.809218	1.30116	0.946582	0.749968	0.574907	1.54553	0.767267	1.81378	0.687437	1.16352	0.843231	1.68296	1.21875	1.70031	1.17097	2.01684	1.19549
P37837	TALDO1	Transaldolase OS=Homo sapiens OX=9606 GN=TALDO1 PE=1 SV=2	1.00598	0.828515	1.2251	1.84459	1.0887	1.40454	0.910922	1.71642	1.1207	0.857317	0.848096	0.923446	0.780462	0.808825	0.825935	1.44744	1.19044	0.899503	1.08839	1.03584	0.889336	0.959065	0.91567	0.784421	0.73032	0.813436	0.959464	0.799849	0.95767	0.760489	1.0546	0.837058	0.843406	0.822051	0.815468	1.40289	0.970096	1.4706	0.827769	0.944485	0.828228	1.5089	1.13745	1.35275	1.19375	1.1765	1.18921
P37840	SNCA	Alpha-synuclein OS=Homo sapiens OX=9606 GN=SNCA PE=1 SV=1	0.913325	0.922934	1.04863	2.04387	0.775662	0.751268	0.683968	0.827195	1.43883	1.09657	1.26681	0.888966	1.13508	0.806474	0.814225	1.089	1.69032	0.997439	0.662733	0.775071	2.47701	1.85987	0.996817	0.886935	1.76162	0.912186	1.15629	1.17772	1.28005	1.09536	0.733414	1.05819	0.82188	1.13745	0.870671	1.41157	1.03555	1.71048	1.51593	1.22952	0.913958	1.38108	1.26444	1.58052	1.38665	1.63173	1.75175
P38606	ATP6V1A	V-type proton ATPase catalytic subunit A OS=Homo sapiens OX=9606 GN=ATP6V1A PE=1 SV=2	NA	NA	NA	NA	NA	NA	NA	NA	NA	NA	NA	NA	NA	NA	NA	NA	0.925304	0.902814	1.26155	1.138	1.06548	0.729611	0.776361	0.579669	NA	NA	NA	NA	NA	NA	NA	NA	NA	NA	NA	NA	NA	NA	NA	NA	NA	NA	NA	NA	1.11388	1.52351	1.1734
P39060	COL18A1	Collagen alpha-1(XVIII) chain OS=Homo sapiens OX=9606 GN=COL18A1 PE=1 SV=5	NA	NA	NA	NA	NA	NA	NA	NA	NA	NA	NA	NA	NA	NA	NA	NA	1.35388	1.0899	1.24169	1.34882	1.35341	1.65577	1.9964	1.78065	NA	NA	NA	NA	NA	NA	NA	NA	NA	NA	1.00271	1.71796	1.59815	1.51887	0.867839	1.31942	1.13163	1.25606	1.6733	1.6047	NA	NA	NA
P40189	IL6ST	Interleukin-6 receptor subunit beta OS=Homo sapiens OX=9606 GN=IL6ST PE=1 SV=2	1.3251	0.893166	1.03133	0.921209	1.03792	1.08358	1.04247	1.09612	1.19764	1.38655	1.0334	1.35144	0.977047	1.39823	1.02491	1.43814	NA	NA	NA	NA	NA	NA	NA	NA	NA	NA	NA	NA	NA	NA	NA	NA	NA	NA	2.34388	1.59527	1.88322	1.27783	0.965133	0.932904	1.20455	0.878004	1.07953	0.907079	1.17511	0.82909	1.11551
P40197	GP5	Platelet glycoprotein V OS=Homo sapiens OX=9606 GN=GP5 PE=1 SV=1	NA	NA	NA	NA	NA	NA	NA	NA	1.67226	1.20731	1.3903	2.26577	1.2028	1.32418	1.13069	1.00146	3.53939	1.16352	1.06614	1.30161	2.11213	2.05894	1.48514	1.5744	2.9839	1.76418	1.19889	1.15773	2.8015	1.48854	0.984389	1.38578	1.07066	2.6257	0.381776	0.741131	0.447078	1.10175	0.636309	0.502745	0.4542	0.696985	0.814903	0.794324	1.32116	1.6358	1.34239
P40306	PSMB10	Proteasome subunit beta type-10 OS=Homo sapiens OX=9606 GN=PSMB10 PE=1 SV=1	1.43435	1.12288	0.968551	1.03908	2.18238	3.83174	1.89855	1.58887	0.9084	1.05249	0.878674	0.968752	1.18904	0.8923	0.705051	1.06533	1.15285	1.16441	1.26716	1.07885	1.08237	0.878248	1.25353	0.795592	NA	NA	NA	NA	NA	NA	NA	NA	NA	NA	NA	NA	NA	NA	NA	NA	NA	NA	NA	NA	NA	NA	NA
P40925	MDH1	Malate dehydrogenase, cytoplasmic OS=Homo sapiens OX=9606 GN=MDH1 PE=1 SV=4	0.820514	0.669845	1.04348	1.73363	0.901063	0.842997	0.692603	1.48751	0.882887	0.718321	0.76993	0.880747	0.835899	0.809386	0.634591	1.24074	1.4287	1.08192	1.06666	0.874421	1.0796	1.12459	0.943962	1.02662	1.16578	0.835725	0.764612	0.887058	1.03011	0.918213	0.935559	1.17862	0.927295	1.08824	1.05768	1.28449	1.28263	1.38896	1.14735	1.19317	1.05856	1.65393	1.26909	1.38713	NA	NA	NA
P41222	PTGDS	Prostaglandin-H2 D-isomerase OS=Homo sapiens OX=9606 GN=PTGDS PE=1 SV=1	0.784367	0.947633	0.93368	1.10826	1.04304	1.02278	1.5132	1.33108	0.886627	1.09043	0.87971	1.07781	1.00654	1.02826	0.83642	0.81881	0.766416	0.747166	0.844108	0.814733	0.954952	0.939002	1.07408	1.66832	1.06408	0.932063	0.81462	1.04652	1.2379	1.34369	0.912123	0.884234	0.883009	0.996333	1.20422	0.984116	1.21596	0.964464	1.18239	1.23988	1.17862	1.08538	1.44493	1.40027	0.823934	0.667065	0.866217
P42574	CASP3	Caspase-3 OS=Homo sapiens OX=9606 GN=CASP3 PE=1 SV=2	NA	NA	NA	NA	NA	NA	NA	NA	1.50337	0.65916	1.11705	0.82955	1.08764	0.56656	0.628768	0.547678	NA	NA	NA	NA	NA	NA	NA	NA	NA	NA	NA	NA	NA	NA	NA	NA	NA	NA	1.91653	1.79104	1.0927	1.55197	1.41942	0.701541	0.903815	1.38828	1.15549	1.45912	NA	NA	NA
P42765	ACAA2	3-ketoacyl-CoA thiolase, mitochondrial OS=Homo sapiens OX=9606 GN=ACAA2 PE=1 SV=2	NA	NA	NA	NA	NA	NA	NA	NA	NA	NA	NA	NA	NA	NA	NA	NA	2.22669	1.00486	5.44752	1.40114	0.872484	1.04507	0.761175	1.0242	NA	NA	NA	NA	NA	NA	NA	NA	NA	NA	NA	NA	NA	NA	NA	NA	NA	NA	NA	NA	NA	NA	NA
P43121	MCAM	Cell surface glycoprotein MUC18 OS=Homo sapiens OX=9606 GN=MCAM PE=1 SV=2	0.929289	1.26637	0.909408	0.870008	1.32345	1.02321	1.35332	1.3144	3.38651	3.27524	2.75662	2.23798	1.17666	1.06792	0.977454	0.633844	0.257439	0.368465	0.390691	0.416388	0.315519	0.296479	0.284047	0.287214	0.957404	1.09361	0.83729	0.94442	0.859518	1.06334	0.963062	0.93271	0.947173	0.898008	1.11822	1.06481	1.11319	1.19814	1.12257	1.29756	1.00493	0.973869	0.993574	0.90645	0.748358	0.840197	0.789056
P43251	BTD	Biotinidase OS=Homo sapiens OX=9606 GN=BTD PE=1 SV=2	0.936337	1.00173	0.912565	0.905069	1.0141	0.983366	0.854943	0.861188	0.974747	1.01974	0.954224	1.03857	1.17357	1.20155	1.09596	1.15373	1.02038	1.23277	1.03684	1.19086	1.03972	1.03491	0.929483	1.14615	1.09142	1.33802	1.07721	1.06925	1.01544	1.26392	1.03204	1.18148	1.14902	1.31321	0.955084	1.01319	1.02968	0.898195	0.908652	0.999861	0.894777	0.775393	0.870128	0.854587	1.06113	1.28227	1.14013
P43652	AFM	Afamin OS=Homo sapiens OX=9606 GN=AFM PE=1 SV=1	0.886627	1.06496	0.952374	1.33478	1.19449	0.987943	1.0362	1.31869	0.738311	0.937116	0.908526	0.908715	1.05088	1.09308	0.908904	1.42662	1.13069	1.46013	1.26742	1.32006	1.29253	1.58942	1.04826	1.85446	1.65496	1.55261	0.907708	1.04471	0.980643	1.40454	0.987738	1.26567	1.35632	1.37735	0.843933	0.678114	0.708579	0.823192	0.793994	0.870189	0.776953	0.800404	0.598283	0.694911	1.25492	0.783334	0.836073
P47756	CAPZB	F-actin-capping protein subunit beta OS=Homo sapiens OX=9606 GN=CAPZB PE=1 SV=4	0.956873	0.760964	1.02911	1.11899	0.794379	0.861367	0.889582	1.11682	1.21403	1.15325	1.07602	1.15533	1.00007	1.10811	1.41402	0.898568	NA	NA	NA	NA	NA	NA	NA	NA	NA	NA	NA	NA	NA	NA	NA	NA	NA	NA	0.858089	1.74207	1.23448	2.01684	1.4568	1.15541	1.11613	2.03637	1.15693	1.91627	1.1805	1.69502	1.30858
P48426	PIP4K2A	Phosphatidylinositol 5-phosphate 4-kinase type-2 alpha OS=Homo sapiens OX=9606 GN=PIP4K2A PE=1 SV=2	NA	NA	NA	NA	NA	NA	NA	NA	1.16223	0.774212	1.34546	1.04826	1.16991	0.845338	1.57757	0.894405	1.00849	0.956277	0.79493	0.887673	0.857435	1.48514	0.875755	1.10259	1.20255	0.958267	0.831161	0.937766	1.08433	0.926331	0.911933	1.23525	0.87321	0.981527	1.03018	3.02346	0.618052	3.35683	1.5977	1.62304	1.46673	2.82804	1.71511	2.95591	NA	NA	NA
P48637	GSS	Glutathione synthetase OS=Homo sapiens OX=9606 GN=GSS PE=1 SV=1	1.09794	1.03011	0.997439	1.02349	1.19309	1.54382	1.02804	1.26839	0.934004	0.822051	1.00389	1.09293	0.986643	0.958666	1.01776	1.06858	1.00891	1.17519	1.26435	1.1395	0.946976	0.738413	0.884357	0.733974	1.09452	0.803572	1.40464	1.21723	1.008	0.930063	1.06098	0.977725	0.913578	0.88454	1.13997	0.935105	1.09361	1.00521	0.94632	0.892794	0.939588	0.928517	0.88148	0.897759	1.26514	0.848449	1.22637
P48740	MASP1	Mannan-binding lectin serine protease 1 OS=Homo sapiens OX=9606 GN=MASP1 PE=1 SV=3	1.0319	0.94285	1.33932	1.22459	0.896329	1.04848	1.05103	1.06962	0.783986	0.835493	0.802237	0.975761	1.15165	1.11767	1.05526	0.979217	1.07758	1.12787	1.2084	1.23217	1.13288	1.04268	0.969827	0.986643	1.19342	1.19864	1.01108	1.05044	0.99048	1.14353	1.00035	1.03075	1.01234	1.08245	1.19914	1.00675	1.17032	0.967612	0.756703	0.731789	1.43644	1.34416	1.24816	1.20047	1.20297	1.20422	1.39736
P48741	HSPA7	Putative heat shock 70 kDa protein 7 OS=Homo sapiens OX=9606 GN=HSPA7 PE=5 SV=2	1.37946	1.07587	1.58173	2.161	1.36955	1.47458	1.20439	1.33635	1.08005	1.1221	1.11938	1.18435	1.06194	1.29012	1.0853	1.13241	1.33913	0.968417	1.39765	1.66313	1.28183	1.19989	0.995298	1.09931	1.07549	1.03369	1.27704	0.853344	1.15173	0.967612	1.09081	1.17072	0.957537	0.817732	1.58909	1.37984	1.44633	1.5339	1.22035	1.47867	1.29828	1.36822	1.38185	1.5566	1.0041	0.817392	0.967008
P49257	LMAN1	Protein ERGIC-53 OS=Homo sapiens OX=9606 GN=LMAN1 PE=1 SV=2	0.822678	0.81034	1.05841	1.50639	1.44433	1.67574	1.92759	1.99612	NA	NA	NA	NA	NA	NA	NA	NA	0.49039	0.517812	0.551105	0.644387	0.643941	0.692795	0.833989	0.623387	NA	NA	NA	NA	NA	NA	NA	NA	NA	NA	NA	NA	NA	NA	NA	NA	NA	NA	NA	NA	NA	NA	NA
P49407	ARRB1	Beta-arrestin-1 OS=Homo sapiens OX=9606 GN=ARRB1 PE=1 SV=2	NA	NA	NA	NA	NA	NA	NA	NA	NA	NA	NA	NA	NA	NA	NA	NA	NA	NA	NA	NA	NA	NA	NA	NA	NA	NA	NA	NA	NA	NA	NA	NA	NA	NA	NA	NA	NA	NA	NA	NA	NA	NA	NA	NA	1.20865	1.08998	1.02463
P49454	CENPF	Centromere protein F OS=Homo sapiens OX=9606 GN=CENPF PE=1 SV=3	NA	NA	NA	NA	NA	NA	NA	NA	NA	NA	NA	NA	NA	NA	NA	NA	NA	NA	NA	NA	NA	NA	NA	NA	NA	NA	NA	NA	NA	NA	NA	NA	NA	NA	NA	NA	NA	NA	NA	NA	NA	NA	NA	NA	NA	NA	NA
P49720	PSMB3	Proteasome subunit beta type-3 OS=Homo sapiens OX=9606 GN=PSMB3 PE=1 SV=2	1.27394	1.06747	1.10657	1.11736	1.11396	2.51054	1.31312	1.20205	0.716133	0.742622	0.77733	0.858208	1.07669	0.962594	0.760753	1.16272	1.31969	1.25327	1.79626	1.62135	1.03462	0.841713	1.31613	0.976573	0.872302	0.907519	1.14695	0.761333	1.00968	1.00772	0.996195	1.01755	1.12521	1.29954	NA	NA	NA	NA	NA	NA	NA	NA	NA	NA	NA	NA	NA
P49721	PSMB2	Proteasome subunit beta type-2 OS=Homo sapiens OX=9606 GN=PSMB2 PE=1 SV=1	1.03548	1.13729	0.654017	1.34127	2.55762	1.45387	1.43177	1.62935	NA	NA	NA	NA	NA	NA	NA	NA	1.33256	1.37526	1.76933	1.8264	1.09756	0.960728	1.42326	0.616383	NA	NA	NA	NA	NA	NA	NA	NA	NA	NA	NA	NA	NA	NA	NA	NA	NA	NA	NA	NA	NA	NA	NA
P49746	THBS3	Thrombospondin-3 OS=Homo sapiens OX=9606 GN=THBS3 PE=1 SV=1	1.03735	0.733465	0.654334	0.667112	0.645505	0.482935	0.536444	0.397382	0.959996	0.988628	0.70696	0.863878	0.688248	0.84569	0.551564	0.776146	1.13918	0.801181	0.737135	0.749656	0.87206	0.88405	0.750436	0.783606	1.02378	0.888165	0.710398	1.03283	1.20239	1.03261	0.957072	1.20039	0.995643	1.01515	0.894591	1.28271	2.01684	2.1022	2.03792	1.8797	1.20314	1.3218	1.79838	1.76369	1.50525	1.47264	2.28945
P49747	COMP	Cartilage oligomeric matrix protein OS=Homo sapiens OX=9606 GN=COMP PE=1 SV=2	1.12249	1.51708	1.22757	1.07602	1.50087	1.26103	1.33543	1.77166	1.90686	0.997162	1.0172	1.02697	1.02314	0.906388	1.03519	0.830182	1.16417	0.979488	0.790315	0.823877	0.935623	1.57669	1.09779	1.19748	1.00668	1.21403	1.0242	1.41402	1.38108	1.39474	1.26848	1.12795	1.84843	1.13186	1.12662	0.955482	0.966807	0.753145	1.21664	1.78398	1.16433	0.969021	0.989725	0.69771	1.13784	1.19806	1.09954
P49792	RANBP2	E3 SUMO-protein ligase RanBP2 OS=Homo sapiens OX=9606 GN=RANBP2 PE=1 SV=2	NA	NA	NA	NA	NA	NA	NA	NA	0.455651	0.575944	0.467812	0.869284	0.802237	0.554055	1.06696	1.81403	0.604159	0.625595	0.44436	0.453194	0.53248	0.647163	0.658201	0.853463	0.629204	0.875149	0.469761	0.507472	0.63675	0.590578	0.826679	1.26953	1.19599	0.601735	NA	NA	NA	NA	NA	NA	NA	NA	NA	NA	NA	NA	NA
P49908	SELENOP	Selenoprotein P OS=Homo sapiens OX=9606 GN=SELENOP PE=1 SV=3	1.06784	0.889336	0.886443	1.17032	1.10988	1.03412	1.06533	0.798575	1.2115	1.46683	1.34892	1.12521	1.25797	1.38693	1.10061	1.70787	0.941544	1.03476	1.04819	1.14124	1.07512	1.19458	1.13619	1.23808	1.40483	1.41304	1.05015	1.04986	1.24651	1.48895	1.25806	1.19408	1.13265	1.29397	0.886013	1.0294	0.751789	0.755236	0.702076	0.783334	0.720415	0.655878	0.649499	0.710349	0.915988	0.990274	0.854943
P49913	CAMP	Cathelicidin antimicrobial peptide OS=Homo sapiens OX=9606 GN=CAMP PE=1 SV=1	NA	NA	NA	NA	NA	NA	NA	NA	1.06503	1.76871	1.31878	1.13934	1.34294	1.65611	1.32235	1.65703	NA	NA	NA	NA	NA	NA	NA	NA	4.1716	2.3017	1.83464	2.53907	0.840838	1.49589	0.84405	1.16385	1.42929	1.74787	1.25145	0.639759	0.459679	0.462877	2.27663	3.32349	0.877883	0.740823	1.84318	1.62777	2.71773	2.14548	2.67215
P50281	MMP14	Matrix metalloproteinase-14 OS=Homo sapiens OX=9606 GN=MMP14 PE=1 SV=3	NA	NA	NA	NA	NA	NA	NA	NA	NA	NA	NA	NA	NA	NA	NA	NA	NA	NA	NA	NA	NA	NA	NA	NA	NA	NA	NA	NA	NA	NA	NA	NA	NA	NA	NA	NA	NA	NA	NA	NA	NA	NA	NA	NA	NA	NA	NA
P50395	GDI2	Rab GDP dissociation inhibitor beta OS=Homo sapiens OX=9606 GN=GDI2 PE=1 SV=2	0.951186	0.806921	1.12054	2.46605	1.51908	1.04522	1.51666	1.33589	0.855299	0.976032	0.654833	0.879161	0.462364	0.721464	0.66725	1.13006	1.28752	0.973127	0.831103	1.07467	1.19806	1.66775	1.23833	1.18394	1.2828	1.15093	0.932451	1.01939	1.19997	1.06747	1.01544	1.31349	1.19748	1.27112	NA	NA	NA	NA	NA	NA	NA	NA	NA	NA	NA	NA	NA
P50502	ST13	Hsc70-interacting protein OS=Homo sapiens OX=9606 GN=ST13 PE=1 SV=2	0.850687	0.929612	1.04623	1.80663	1.11157	1.24885	1.14314	1.61608	1.56071	1.70574	1.24143	1.21184	1.64422	0.776415	0.447606	2.48871	NA	NA	NA	NA	NA	NA	NA	NA	NA	NA	NA	NA	NA	NA	NA	NA	NA	NA	NA	NA	NA	NA	NA	NA	NA	NA	NA	NA	1.1003	1.04478	1.18526
P50552	VASP	Vasodilator-stimulated phosphoprotein OS=Homo sapiens OX=9606 GN=VASP PE=1 SV=3	NA	NA	NA	NA	NA	NA	NA	NA	2.97605	1.11419	1.42366	1.51614	2.15547	1.23533	1.05336	0.959796	1.54885	0.867058	0.663101	0.885031	1.22586	1.06371	0.874057	1.02257	NA	NA	NA	NA	NA	NA	NA	NA	NA	NA	0.368235	3.09341	0.809947	2.17603	0.629859	1.25867	1.19657	3.2898	1.07684	3.31153	0.947436	5.50675	2.30937
P50990	CCT8	T-complex protein 1 subunit theta OS=Homo sapiens OX=9606 GN=CCT8 PE=1 SV=4	NA	NA	NA	NA	NA	NA	NA	NA	NA	NA	NA	NA	NA	NA	NA	NA	NA	NA	NA	NA	NA	NA	NA	NA	1.30233	0.872484	1.005	1.02769	1.26164	1.19383	1.04478	1.69114	1.04174	0.976302	0.76897	1.15061	1.01558	1.20397	0.866577	0.727087	0.858149	1.14894	1.07691	1.26646	1.41647	2.1076	1.08658
P50995	ANXA11	Annexin A11 OS=Homo sapiens OX=9606 GN=ANXA11 PE=1 SV=1	NA	NA	NA	NA	NA	NA	NA	NA	1.35999	1.01487	0.686675	1.023	0.57149	1.00521	0.460988	0.614634	NA	NA	NA	NA	NA	NA	NA	NA	NA	NA	NA	NA	NA	NA	NA	NA	NA	NA	0.576423	1.10988	0.482065	0.869525	0.401647	0.787035	0.63728	0.982889	0.593986	0.670356	NA	NA	NA
P51149	RAB7A	Ras-related protein Rab-7a OS=Homo sapiens OX=9606 GN=RAB7A PE=1 SV=1	0.313709	0.444144	0.422815	0.395459	0.385392	0.40226	0.381406	0.400119	0.833584	0.714794	0.951252	0.819718	0.663929	0.624338	1.06341	1.0793	0.738362	0.87618	0.663423	0.802459	0.845279	1.17267	1.11072	1.04572	0.898319	0.928195	0.694333	0.866097	1.03061	1.04348	1.52975	0.934781	1.61675	0.546616	0.863998	1.45246	0.914085	1.4025	0.97252	1.09718	0.862263	1.42998	1.25754	1.46846	0.523441	1.43396	0.992955
P51452	DUSP3	Dual specificity protein phosphatase 3 OS=Homo sapiens OX=9606 GN=DUSP3 PE=1 SV=1	NA	NA	NA	NA	NA	NA	NA	NA	NA	NA	NA	NA	NA	NA	NA	NA	NA	NA	NA	NA	NA	NA	NA	NA	NA	NA	NA	NA	NA	NA	NA	NA	NA	NA	0.841713	1.48617	0.902751	1.75491	0.901875	0.955349	0.834914	1.5373	1.19152	1.43366	1.43575	1.39736	1.46937
P51884	LUM	Lumican OS=Homo sapiens OX=9606 GN=LUM PE=1 SV=2	0.808433	0.746286	1.13037	1.10343	0.924023	1.00305	1.14171	1.07691	0.962795	1.01551	0.923446	1.06496	0.776415	1.04145	0.865797	0.908589	0.85702	0.801903	0.663009	0.696357	0.971779	1.31622	1.09142	1.29603	0.918594	1.33413	0.947567	0.930127	1.07848	0.856129	1.08598	1.17731	1.21092	1.14902	1.00243	1.20606	1.15245	0.973599	0.878674	1.62405	1.03706	1.35416	0.796695	1.14599	0.932645	1.26742	1.01312
P52209	PGD	6-phosphogluconate dehydrogenase, decarboxylating OS=Homo sapiens OX=9606 GN=PGD PE=1 SV=3	1.19317	0.778841	1.54542	2.30857	1.03268	0.880808	0.797966	1.79241	1.10749	0.957404	0.928002	0.982344	0.970096	0.972251	0.806418	1.50108	1.25658	0.958068	0.966405	1.00849	1.1855	1.17862	1.12303	0.910986	1.10229	0.978335	0.930256	0.802181	1.05409	0.90903	0.908841	1.28824	0.929998	1.1433	0.98719	1.36358	1.02576	1.65279	1.06179	0.778841	0.736981	1.70043	1.03893	1.61675	1.4149	1.50108	1.26778
P52565	ARHGDIA	Rho GDP-dissociation inhibitor 1 OS=Homo sapiens OX=9606 GN=ARHGDIA PE=1 SV=3	NA	NA	NA	NA	NA	NA	NA	NA	NA	NA	NA	NA	NA	NA	NA	NA	NA	NA	NA	NA	NA	NA	NA	NA	NA	NA	NA	NA	NA	NA	NA	NA	NA	NA	0.336109	2.15069	0.808377	2.24716	1.10703	0.915036	1.38405	1.97315	1.19218	1.70704	1.49185	1.24022	0.964197
P52566	ARHGDIB	Rho GDP-dissociation inhibitor 2 OS=Homo sapiens OX=9606 GN=ARHGDIB PE=1 SV=3	0.825878	0.684442	0.753876	0.837232	0.69035	0.550685	0.492467	0.786544	1.76651	0.822279	1.16183	0.932322	0.838161	0.725979	0.570698	0.732297	0.980235	0.67259	0.661402	0.848684	0.79664	0.871154	0.686866	0.852162	NA	NA	NA	NA	NA	NA	NA	NA	NA	NA	1.01262	1.49464	1.08425	1.78225	1.10696	1.09407	0.912313	1.45649	1.89054	2.1498	1.016	1.28067	0.888104
P52907	CAPZA1	F-actin-capping protein subunit alpha-1 OS=Homo sapiens OX=9606 GN=CAPZA1 PE=1 SV=3	0.981935	0.715439	1.02883	1.24531	0.874482	0.792015	0.766841	1.09657	0.951714	0.728146	0.932451	0.811465	0.919231	0.857079	0.793774	0.728449	1.05088	0.804743	0.848096	0.819491	1.09066	0.93103	0.791137	0.938937	1.35079	0.914592	1.04268	0.811127	1.41451	1.11713	0.881236	1.32611	0.89664	1.06814	1.0041	1.10023	1.16159	1.38992	1.13611	1.17764	0.969357	1.22842	0.998338	1.34807	1.08696	1.21008	1.02009
P54108	CRISP3	Cysteine-rich secretory protein 3 OS=Homo sapiens OX=9606 GN=CRISP3 PE=1 SV=1	1.11196	1.00528	0.940826	0.702174	0.791521	0.706274	0.621876	0.670589	0.914592	0.992336	1.14409	1.05416	1.07229	1.30622	1.15221	0.984798	0.746182	0.927873	0.974409	0.903189	0.865257	0.752363	0.881725	0.914275	1.42425	1.28485	1.1717	1.28138	1.05197	1.29873	1.0367	1.24747	1.25405	1.34723	1.42939	1.16498	0.809386	0.820685	1.15365	1.56645	0.849685	0.900751	0.866217	0.7803	1.57778	0.912692	1.19491
P54289	CACNA2D1	Voltage-dependent calcium channel subunit alpha-2/delta-1 OS=Homo sapiens OX=9606 GN=CACNA2D1 PE=1 SV=3	NA	NA	NA	NA	NA	NA	NA	NA	NA	NA	NA	NA	NA	NA	NA	NA	NA	NA	NA	NA	NA	NA	NA	NA	NA	NA	NA	NA	NA	NA	NA	NA	NA	NA	1.18723	1.12397	0.944944	0.733668	0.977657	1.3143	1.09764	0.94187	1.02527	0.865077	NA	NA	NA
P55056	APOC4	Apolipoprotein C-IV OS=Homo sapiens OX=9606 GN=APOC4 PE=1 SV=1	1.09916	0.789111	0.815072	0.760858	0.836652	0.897572	0.89131	0.817959	1.11435	1.30731	0.91548	0.906136	1.05937	1.089	0.886505	0.859339	1.21613	1.2314	1.12062	1.48669	0.974545	0.924151	0.924087	1.01052	1.67284	1.31203	1.60414	1.26786	1.12334	1.3743	0.802181	1.08907	1.31321	1.06895	1.72477	1.2131	0.918149	0.825763	1.33932	1.2877	1.40085	1.16135	1.35962	1.07267	1.16538	1.15837	1.23396
P55058	PLTP	Phospholipid transfer protein OS=Homo sapiens OX=9606 GN=PLTP PE=1 SV=1	0.816826	1.02441	0.998684	1.27668	0.729965	0.778247	0.710349	0.674318	0.860532	0.804018	0.846041	1.02264	0.779705	0.970164	0.826851	0.905948	0.919104	0.967075	0.67694	0.713606	0.820969	1.00647	0.900314	1.09726	0.798852	1.03154	0.824734	0.824219	0.886935	0.937636	1.10053	1.03994	1.30622	1.30876	1.07542	0.986028	1.11443	1.10313	1.08719	1.34267	1.16215	1.33469	0.925689	1.0294	1.04558	1.29594	1.07923
P55072	VCP	Transitional endoplasmic reticulum ATPase OS=Homo sapiens OX=9606 GN=VCP PE=1 SV=4	0.721865	0.555824	0.773354	1.18386	0.85928	1.0203	1.05614	1.22595	1.17129	0.87049	1.08237	0.810677	0.842355	0.536742	0.639493	0.860651	1.0421	1.01396	0.794985	0.809779	1.0196	1.05658	0.913578	0.89608	0.959131	1.0041	0.42261	1.29199	0.485183	0.703002	0.436333	1.0949	0.592629	1.20122	0.86328	1.40854	0.770144	1.32125	1.63717	1.1911	1.18419	2.22823	1.17544	1.59295	0.803851	1.28851	1.06747
P55103	INHBC	Inhibin beta C chain OS=Homo sapiens OX=9606 GN=INHBC PE=2 SV=1	0.960795	1.29585	1.58195	1.52288	1.49216	1.42979	1.36803	1.50243	0.678302	0.882275	1.16878	1.26778	1.19218	1.3074	1.01396	1.14108	0.522354	1.23859	0.740001	1.01523	1.73039	1.50671	1.14782	1.2598	1.15093	1.81491	1.26068	1.46104	1.17821	1.12163	1.3492	1.52066	1.26681	1.36339	1.36983	0.996471	1.55455	0.849626	1.17332	1.10473	1.43575	1.02378	1.27642	1.18263	NA	NA	NA
P55209	NAP1L1	Nucleosome assembly protein 1-like 1 OS=Homo sapiens OX=9606 GN=NAP1L1 PE=1 SV=1	0.732906	0.485115	0.738925	1.15261	0.515091	0.34587	0.343766	0.599279	0.696599	0.605794	0.91675	1.37869	0.738311	0.783171	0.617367	1.35472	NA	NA	NA	NA	NA	NA	NA	NA	1.02385	0.667991	0.672917	0.417805	1.27015	0.453288	0.576623	0.254652	0.725325	0.650491	NA	2.03299	1.23971	3.20073	1.16643	1.67644	1.42227	2.81064	1.58678	2.7507	1.8202	2.96514	1.27544
P55290	CDH13	Cadherin-13 OS=Homo sapiens OX=9606 GN=CDH13 PE=1 SV=1	0.92524	0.864717	1.02059	1.04435	1.00486	0.872847	1.00703	1.1595	1.1935	1.07646	1.08403	0.973599	0.851218	0.932128	0.932451	0.778463	0.891249	0.984457	0.840372	0.811633	0.891867	1.16902	0.857376	1.11605	0.76202	0.991717	0.786163	0.696937	1.03677	1.05775	0.848861	0.888843	1.20022	1.24074	1.30505	1.31294	1.31303	0.968215	1.282	1.43903	1.53358	1.27147	1.05541	0.928259	1.28405	1.18189	1.05066
P55786	NPEPPS	Puromycin-sensitive aminopeptidase OS=Homo sapiens OX=9606 GN=NPEPPS PE=1 SV=2	NA	NA	NA	NA	NA	NA	NA	NA	0.967276	0.969962	0.938872	1.04153	0.979013	0.843816	0.775071	0.94442	2.5238	2.89829	2.279	1.83375	2.42318	1.24306	2.45207	1.46734	0.730877	0.880564	0.914085	0.780191	0.950132	0.960728	1.01094	0.958334	1.2251	1.22935	NA	NA	NA	NA	NA	NA	NA	NA	NA	NA	1.28931	0.988491	1.08463
P55957	BID	BH3-interacting domain death agonist OS=Homo sapiens OX=9606 GN=BID PE=1 SV=1	NA	NA	NA	NA	NA	NA	NA	NA	NA	NA	NA	NA	NA	NA	NA	NA	NA	NA	NA	NA	NA	NA	NA	NA	NA	NA	NA	NA	NA	NA	NA	NA	NA	NA	0.900751	1.69243	1.6017	3.77166	2.06137	1.3164	1.465	2.75777	1.67215	2.60142	1.44643	1.34341	1.57037
P58166	INHBE	Inhibin beta E chain OS=Homo sapiens OX=9606 GN=INHBE PE=1 SV=1	0.989108	1.27872	1.23456	1.05797	1.20572	1.35802	1.21192	1.78485	0.827253	0.959929	1.0087	1.11203	1.0429	1.07714	1.05951	1.15037	0.468428	0.917131	0.554669	0.529793	0.543029	0.538045	0.450594	0.546692	NA	NA	NA	NA	NA	NA	NA	NA	NA	NA	NA	NA	NA	NA	NA	NA	NA	NA	NA	NA	1.25024	1.17642	1.29999
P58335	ANTXR2	Anthrax toxin receptor 2 OS=Homo sapiens OX=9606 GN=ANTXR2 PE=1 SV=5	NA	NA	NA	NA	NA	NA	NA	NA	NA	NA	NA	NA	NA	NA	NA	NA	NA	NA	NA	NA	NA	NA	NA	NA	0.860114	1.00257	0.896329	1.0357	1.07766	1.09733	1.04826	1.03247	1.31394	1.53794	1.08945	1.07066	0.858506	0.98214	1.57636	2.08551	1.38578	1.3422	0.903753	1.01826	NA	NA	NA
P58546	MTPN	Myotrophin OS=Homo sapiens OX=9606 GN=MTPN PE=1 SV=2	0.897572	0.63556	0.745665	1.15597	0.504771	0.497338	0.547678	0.67633	1.82931	0.753354	0.98856	0.94063	0.828228	0.716183	0.56896	0.67287	1.24807	0.639626	0.583822	0.639271	0.828285	1.0367	0.691116	0.80413	NA	NA	NA	NA	NA	NA	NA	NA	NA	NA	NA	1.53666	1.07438	2.02469	0.666418	0.966338	0.894839	1.246	1.15998	1.76871	1.63535	1.87826	1.35238
P60174	TPI1	Triosephosphate isomerase OS=Homo sapiens OX=9606 GN=TPI1 PE=1 SV=3	0.783171	0.708333	0.944616	1.44013	0.738515	0.786817	0.659023	0.910796	1.20564	0.913198	1.008	0.79653	0.99585	0.764665	0.710152	0.858446	1.08643	0.896267	0.801792	0.842705	0.949145	1.02619	0.84288	0.936792	1.3632	0.851218	0.681365	0.863699	1.02059	0.805078	0.737032	1.11613	0.708824	1.19848	0.987259	1.86995	1.05753	2.13347	1.55315	1.16546	1.03951	1.91667	1.44744	2.07268	1.15269	1.406	1.35444
P60660	MYL6	Myosin light polypeptide 6 OS=Homo sapiens OX=9606 GN=MYL6 PE=1 SV=2	NA	NA	NA	NA	NA	NA	NA	NA	0.825763	0.622049	1.24134	0.831392	2.30569	0.695971	0.894839	0.532554	0.924856	1.40903	1.01143	0.735807	0.942001	0.822108	0.640957	0.749292	2.07082	0.723919	0.946582	1.12303	0.67301	1.19981	0.683825	0.78933	0.754033	1.72488	0.661036	1.12334	0.892423	1.3807	1.881	0.965401	1.31713	1.47754	0.985071	1.57254	0.973532	0.95482	0.838568
P60709	ACTB	Actin, cytoplasmic 1 OS=Homo sapiens OX=9606 GN=ACTB PE=1 SV=1	0.900127	0.778625	0.915353	1.05241	0.880198	0.991304	0.913262	1.15861	1.35548	0.762389	1.29945	0.989451	1.23954	0.772443	0.837523	0.758857	1.33793	1.05023	0.922934	0.862682	1.00125	1.07557	0.867779	0.9437	1.58096	0.885338	1.01234	1.07341	1.12779	0.980303	0.882703	1.49755	0.849862	1.2131	0.78922	1.81856	1.04768	2.09087	1.26584	1.04369	1.11095	2.02244	1.30704	2.02904	1.01804	1.54917	1.0071
P60900	PSMA6	Proteasome subunit alpha type-6 OS=Homo sapiens OX=9606 GN=PSMA6 PE=1 SV=1	1.38703	0.979964	0.879161	0.84078	1.46185	2.63499	1.28343	1.24005	0.797469	0.938611	0.871819	0.898631	1.09247	0.915924	0.812252	1.0557	1.42652	1.29119	2.03665	1.6644	0.942915	0.660898	1.13682	0.57058	0.765142	0.549351	1.95247	1.18181	0.99516	0.897013	0.917831	0.648645	0.459616	0.623733	0.845279	0.682641	0.780678	0.592505	0.811858	0.609712	0.67287	0.670961	0.771801	0.683304	0.750383	0.676893	0.857079
P60953	CDC42	Cell division control protein 42 homolog OS=Homo sapiens OX=9606 GN=CDC42 PE=1 SV=2	NA	NA	NA	NA	NA	NA	NA	NA	1.41235	0.772871	1.15445	1.07244	0.986369	1.12405	1.08043	0.906011	1.12303	0.675534	0.686961	0.625638	0.820685	1.09376	0.682168	0.774641	1.0463	0.867298	0.867479	0.987943	1.77129	1.54157	0.964732	1.69373	0.882581	1.04601	0.73872	1.4653	1.03713	1.6576	0.99654	1.31412	0.861069	1.57636	0.974815	1.88635	1.05533	1.27218	1.28886
P61006	RAB8A	Ras-related protein Rab-8A OS=Homo sapiens OX=9606 GN=RAB8A PE=1 SV=1	NA	NA	NA	NA	NA	NA	NA	NA	NA	NA	NA	NA	NA	NA	NA	NA	NA	NA	NA	NA	NA	NA	NA	NA	1.21067	1.07348	1.21537	1.16352	1.07029	1.08734	1.38271	1.30985	0.856129	0.74898	0.707352	1.60781	0.93271	2.03552	1.26409	1.26699	1.27651	3.48341	1.59229	1.75723	NA	NA	NA
P61088	UBE2N	Ubiquitin-conjugating enzyme E2 N OS=Homo sapiens OX=9606 GN=UBE2N PE=1 SV=1	NA	NA	NA	NA	NA	NA	NA	NA	NA	NA	NA	NA	NA	NA	NA	NA	1.2518	0.927102	0.679526	0.823192	0.886505	0.995436	0.687533	0.664435	NA	NA	NA	NA	NA	NA	NA	NA	NA	NA	0.820798	1.74448	1.11049	2.04627	1.68787	1.40007	1.59527	1.88361	1.76015	2.53555	NA	NA	NA
P61106	RAB14	Ras-related protein Rab-14 OS=Homo sapiens OX=9606 GN=RAB14 PE=1 SV=4	NA	NA	NA	NA	NA	NA	NA	NA	1.73171	0.839208	1.14536	1.02968	0.959131	0.828687	0.795536	0.840605	1.45518	0.617239	0.824791	0.728096	0.674458	1.22586	0.563544	0.773729	0.89751	0.845455	0.793609	0.75912	1.21875	0.76945	1.02229	1.465	0.952044	1.06777	NA	NA	NA	NA	NA	NA	NA	NA	NA	NA	NA	NA	NA
P61158	ACTR3	Actin-related protein 3 OS=Homo sapiens OX=9606 GN=ACTR3 PE=1 SV=3	0.854706	0.719816	0.945337	0.99268	0.732246	0.718072	0.694189	0.869827	NA	NA	NA	NA	NA	NA	NA	NA	NA	NA	NA	NA	NA	NA	NA	NA	NA	NA	NA	NA	NA	NA	NA	NA	NA	NA	0.963729	1.29459	0.591561	1.74775	0.752884	1.12498	0.895149	1.61978	1.88609	2.80014	1.3185	1.6969	1.30568
P61160	ACTR2	Actin-related protein 2 OS=Homo sapiens OX=9606 GN=ACTR2 PE=1 SV=1	NA	NA	NA	NA	NA	NA	NA	NA	1.1832	0.981391	1.18929	1.03419	1.0814	0.951582	0.790534	0.86796	NA	NA	NA	NA	NA	NA	NA	NA	NA	NA	NA	NA	NA	NA	NA	NA	NA	NA	NA	NA	NA	NA	NA	NA	NA	NA	NA	NA	0.629553	0.907268	0.759541
P61224	RAP1B	Ras-related protein Rap-1b OS=Homo sapiens OX=9606 GN=RAP1B PE=1 SV=1	0.708039	0.358787	0.48832	0.532406	0.364528	0.264255	0.291163	0.292721	1.56547	0.789822	0.882214	0.973599	0.766735	0.749656	0.670356	0.646221	1.40756	0.754661	0.660486	0.763553	0.938872	1.51425	0.76913	1.19947	1.11165	0.902751	0.722465	0.603573	1.40454	0.774158	0.72422	1.76577	0.961661	0.964197	0.942131	1.59008	1.40913	2.10731	1.34341	1.34966	1.28636	1.76308	1.68775	1.71404	0.73872	1.24186	0.886566
P61626	LYZ	Lysozyme C OS=Homo sapiens OX=9606 GN=LYZ PE=1 SV=1	0.714497	0.675253	0.989931	0.863579	0.854232	0.809498	1.24453	0.936597	0.904191	0.790315	0.927166	1.45407	0.855951	1.12023	1.02321	0.785291	0.998061	0.979217	1.19997	1.69666	1.1595	1.31777	1.11969	1.39494	1.16578	1.24169	1.24738	1.2379	0.893847	0.803405	0.942719	0.917322	1.05373	1.02257	1.18756	1.27792	1.45286	1.53719	1.02463	1.28797	1.30514	1.12912	1.48206	1.16627	1.3321	1.13816	1.42771
P61769	B2M	Beta-2-microglobulin OS=Homo sapiens OX=9606 GN=B2M PE=1 SV=1	0.774158	0.95	1.70598	1.61743	1.02087	1.00278	1.90832	2.24731	0.780137	0.798132	0.818753	1.11954	0.932193	1.24522	1.12482	0.825248	0.670775	0.677832	0.872423	0.85607	0.823134	0.91168	0.971307	0.92974	0.833873	0.917068	1.60826	1.77055	0.749448	0.83243	0.922295	0.871275	0.925882	0.872726	1.30116	0.950857	1.72692	1.14409	0.849449	0.745355	0.964331	0.814225	1.08561	1.05607	0.861785	0.767586	1.00042
P61916	NPC2	NPC intracellular cholesterol transporter 2 OS=Homo sapiens OX=9606 GN=NPC2 PE=1 SV=1	NA	NA	NA	NA	NA	NA	NA	NA	0.604955	0.684679	0.642202	1.25266	0.900189	0.962661	1.15845	0.779651	2.64708	1.86258	3.20717	1.82906	1.26418	1.19715	1.17927	0.777061	NA	NA	NA	NA	NA	NA	NA	NA	NA	NA	NA	NA	NA	NA	NA	NA	NA	NA	NA	NA	NA	NA	NA
P61981	YWHAG	14-3-3 protein gamma OS=Homo sapiens OX=9606 GN=YWHAG PE=1 SV=2	0.979081	0.857317	0.928388	1.19872	1.09992	1.70043	1.02797	1.29873	1.0041	0.694574	1.06592	1.03419	0.837058	0.70696	0.883744	1	1.39997	1.13359	1.30949	0.922679	0.901063	1.39271	1.1607	0.84405	1.17495	0.836826	1.22706	0.937701	0.957935	0.970029	1.21302	1.24824	1.3853	1.12857	0.703002	1.27165	0.872	1.44944	1.01115	0.797579	0.921784	1.396	1.01847	1.36547	1.25919	1.33774	1.30985
P62258	YWHAE	14-3-3 protein epsilon OS=Homo sapiens OX=9606 GN=YWHAE PE=1 SV=1	1.01431	0.784693	0.91904	1.4709	1.20698	1.7903	1.0511	1.30116	1.03814	0.861367	1.00486	1.0203	1.18698	0.938546	0.911428	1.22417	1.46317	1.31058	1.32097	0.979149	1.0184	0.888165	1.06415	0.828573	1.08448	0.943765	1.11173	0.956144	1.00542	0.972183	0.934263	1.0643	0.899316	1.18288	0.746648	1.14727	0.967008	1.27907	0.942981	0.81626	0.755708	1.21335	0.934586	1.11721	1.03591	1.16619	1.12218
P62263	RPS14	40S ribosomal protein S14 OS=Homo sapiens OX=9606 GN=RPS14 PE=1 SV=3	0.9584	1.14457	0.837232	0.653881	0.794875	0.708775	0.491308	1.21251	NA	NA	NA	NA	NA	NA	NA	NA	NA	NA	NA	NA	NA	NA	NA	NA	NA	NA	NA	NA	NA	NA	NA	NA	NA	NA	NA	NA	NA	NA	NA	NA	NA	NA	NA	NA	NA	NA	NA
P62328	TMSB4X	Thymosin beta-4 OS=Homo sapiens OX=9606 GN=TMSB4X PE=1 SV=2	0.664942	0.691835	0.66232	0.968752	0.557174	0.45398	0.583053	0.922742	1.83414	0.853936	1.47908	0.967209	1.27174	0.854884	0.85169	0.570342	1.49609	0.859042	0.849214	0.710497	0.937246	0.97786	0.753197	0.929418	2.10921	1.03994	0.909913	1.27147	1.4873	1.26216	0.677269	1.46338	0.942915	2.07441	0.850333	1.65554	1.02626	1.99834	1.8954	1.25015	1.16853	1.97452	1.48669	1.9752	1.21655	1.68588	1.19276
P62826	RAN	GTP-binding nuclear protein Ran OS=Homo sapiens OX=9606 GN=RAN PE=1 SV=3	0.893228	0.789494	1.13469	1.95599	1.04016	0.753615	0.956807	0.690398	NA	NA	NA	NA	NA	NA	NA	NA	0.907519	0.774051	0.639537	0.854232	0.837465	0.870671	0.82645	0.791192	1.06032	0.949211	0.975694	0.725627	1.04608	0.748098	0.811633	0.815355	0.788018	0.674271	0.69467	1.57932	1.20089	1.84881	0.924791	1.21858	0.924407	1.73123	1.25006	1.91494	0.99585	1.36037	1.13359
P62873	GNB1	Guanine nucleotide-binding protein G(I)/G(S)/G(T) subunit beta-1 OS=Homo sapiens OX=9606 GN=GNB1 PE=1 SV=3	0.891558	1.01396	1.01206	0.968685	1.05753	1.38309	1.14377	1.13508	1.09316	0.865797	1.22833	0.837058	0.836942	0.740925	0.734024	0.644789	1.0141	1.08696	1.39736	1.10512	1.0546	0.917831	0.877883	0.674318	1.12732	0.941413	1.18271	1.09376	1.04804	1.13761	1.05219	1.07319	1.1221	1.10542	0.735654	1.23371	0.928388	1.27695	1.11582	1.31613	1.14068	1.40991	1.42158	1.27748	1.1708	1.31194	1.15725
P62937	PPIA	Peptidyl-prolyl cis-trans isomerase A OS=Homo sapiens OX=9606 GN=PPIA PE=1 SV=2	0.844518	0.403573	0.791192	1.87397	0.69955	0.602444	0.565814	0.788291	1.63388	0.779057	0.82863	1.01382	0.601526	0.647028	0.538083	0.552329	1.63728	0.759225	0.851041	0.998961	1.26822	1.44133	1.17683	1.26883	0.891929	1.05358	0.803517	0.668778	1.32767	0.721064	0.706519	0.994332	0.842472	1.13367	0.97252	1.49371	1.47621	1.856	1.07841	1.27837	1.17373	1.63932	1.4935	1.49381	1.19292	1.63898	1.35397
P62942	FKBP1A	Peptidyl-prolyl cis-trans isomerase FKBP1A OS=Homo sapiens OX=9606 GN=FKBP1A PE=1 SV=2	0.99103	1.30985	1.26707	1.04138	1.01699	1.11558	1.21596	1.35566	1.00452	0.984457	1.25449	1.41431	1.1369	0.876423	1.13564	0.922934	1.43266	1.37135	1.38597	1.66544	1.20272	1.22706	1.37716	1.22629	1.16231	1.24972	0.71529	0.95396	0.971577	0.886996	0.792125	1.11876	0.845983	1.2043	0.782032	1.03161	1.10152	1.29684	0.994263	1.00912	1.34434	1.20147	1.31339	0.739232	1.15133	0.92524	1.09452
P63104	YWHAZ	14-3-3 protein zeta/delta OS=Homo sapiens OX=9606 GN=YWHAZ PE=1 SV=1	0.906953	0.862442	0.920379	0.983366	0.942197	1.1242	0.800681	1.02222	1.10903	0.758436	1.14346	0.913515	0.959996	0.768864	0.817392	0.743652	1.28476	1.03268	0.982752	0.971106	1.01847	1.10872	0.830988	0.949211	1.25972	0.825706	0.996333	1.07863	1.12358	1.11845	0.755079	1.28245	0.808377	1.36245	1.00215	1.95816	0.991717	2.14266	1.41627	1.03061	1.18157	1.95545	1.38617	2.118	0.879466	1.14488	0.763447
P63313	TMSB10	Thymosin beta-10 OS=Homo sapiens OX=9606 GN=TMSB10 PE=1 SV=2	0.549427	0.787635	0.974072	1.63558	0.838394	0.964866	1.15717	1.88976	1.0899	0.793059	0.835146	1.21546	0.971644	0.766204	0.683731	0.500624	0.95277	0.848626	0.769557	0.743704	0.837987	0.745975	1.05329	0.712321	0.822222	0.705345	1.3045	0.866938	0.789494	0.712272	0.517632	0.6055	0.540063	0.623776	NA	NA	NA	NA	NA	NA	NA	NA	NA	NA	0.74898	1.33237	1.10191
P67936	TPM4	Tropomyosin alpha-4 chain OS=Homo sapiens OX=9606 GN=TPM4 PE=1 SV=3	0.703977	0.493151	0.512527	0.576623	0.372368	0.301912	0.384992	0.344458	1.32905	0.633537	1.34443	0.885092	1.1429	0.666003	0.736726	0.492263	1.43217	0.976776	0.802014	0.751008	0.954621	1.04746	0.776092	1.01136	1.47376	0.869104	0.835493	1.27235	1.32409	1.06223	0.773622	1.56114	0.95211	1.50587	0.776038	1.69279	0.898755	2.14548	1.33719	0.964598	1.11922	2.00305	1.38799	1.94558	1.04601	1.55305	1.20122
P68104	EEF1A1	Elongation factor 1-alpha 1 OS=Homo sapiens OX=9606 GN=EEF1A1 PE=1 SV=1	0.859459	0.919614	1.1964	1.55542	1.13296	1.23166	1.09164	1.40552	NA	NA	NA	NA	NA	NA	NA	NA	1.10711	0.922998	0.922039	0.901875	0.877031	0.966941	0.882825	0.886996	0.677973	0.643405	1.35933	0.600402	1.09574	0.448879	1.06599	0.495377	0.734177	0.544008	0.826221	0.960661	0.945337	1.03598	0.913515	0.797137	1.12951	1.04913	1.16975	1.30731	NA	NA	NA
P68366	TUBA4A	Tubulin alpha-4A chain OS=Homo sapiens OX=9606 GN=TUBA4A PE=1 SV=1	NA	NA	NA	NA	NA	NA	NA	NA	1.48648	0.475264	0.734126	0.938221	0.992817	0.707254	0.67995	0.649905	0.850628	1.04507	0.636574	0.863759	0.766894	0.902626	1.08862	1.35877	0.881847	1.25171	0.911744	1.05125	0.679573	0.877092	0.654244	0.690877	0.853226	0.912882	NA	NA	NA	NA	NA	NA	NA	NA	NA	NA	0.628855	1.16797	0.734839
P68371	TUBB4B	Tubulin beta-4B chain OS=Homo sapiens OX=9606 GN=TUBB4B PE=1 SV=1	0.981323	1.06999	1.14647	1.47396	1.15365	1.17153	1.093	1.96564	1.35088	0.58273	0.760331	0.968752	1.03872	0.695634	0.740104	0.912249	1.14997	1.29208	1.02434	1.02662	0.988628	0.880015	1.05775	0.931676	1.26848	1.39146	1.34267	1.33978	1.64935	1.71916	1.52626	0.869104	1.57026	1.2314	0.906074	2.28169	1.49713	2.03496	1.06577	1.39523	1.46206	2.43902	1.36945	2.3933	0.652839	1.38857	0.411425
P68871	HBB	Hemoglobin subunit beta OS=Homo sapiens OX=9606 GN=HBB PE=1 SV=2	0.927423	1.04717	1.35023	4.57699	0.961328	1.03476	0.82645	1.20698	0.488795	1.29882	0.717077	0.837465	0.737697	0.849685	0.689059	2.24466	0.49634	0.815468	0.513345	0.778463	0.833931	0.600152	0.667574	0.412596	1.46846	1.07706	0.903314	0.939393	0.861427	0.923318	0.771052	1.39891	0.663147	0.756599	1.36443	0.718271	1.26541	0.70193	1.10673	0.908778	0.818072	0.798132	0.888596	0.789384	0.895087	0.805692	1.13737
P69892	HBG2	Hemoglobin subunit gamma-2 OS=Homo sapiens OX=9606 GN=HBG2 PE=1 SV=2	0.996886	1.13745	1.42464	3.80897	0.885645	0.965869	0.734177	0.990274	0.738976	1.13077	0.872847	0.850569	0.902376	0.8631	0.907645	1.22987	0.398707	0.5404	0.436393	0.498236	0.48093	0.387052	1.07998	0.590783	1.20991	1.05249	0.821823	0.774856	0.63082	0.793499	1.07557	2.00472	0.853522	0.956873	1.22646	0.806921	1.12023	0.804241	0.74582	0.919741	0.942197	1.01017	1.31805	1.4798	1.31367	1.00055	1.26339
P69905	HBA1	Hemoglobin subunit alpha OS=Homo sapiens OX=9606 GN=HBA1 PE=1 SV=2	0.932774	1.06784	1.40153	4.65409	1.01059	1.15829	0.904129	1.1897	0.464935	1.28227	0.671612	0.820969	0.708726	0.836073	0.724923	2.11682	0.558373	0.884173	0.587068	0.854765	0.935234	0.733058	0.801014	0.494657	1.44063	1.05212	0.922487	0.906199	0.816146	0.866457	0.823134	1.42464	0.626332	0.690829	1.42188	0.816656	1.12109	0.675066	1.0743	1.01003	0.783171	0.921975	0.789987	0.835319	0.797082	0.81881	1.02477
P78371	CCT2	T-complex protein 1 subunit beta OS=Homo sapiens OX=9606 GN=CCT2 PE=1 SV=4	NA	NA	NA	NA	NA	NA	NA	NA	NA	NA	NA	NA	NA	NA	NA	NA	NA	NA	NA	NA	NA	NA	NA	NA	NA	NA	NA	NA	NA	NA	NA	NA	NA	NA	0.766576	1.39678	0.905132	1.37268	0.953761	1.04652	1.25954	1.80751	1.24643	1.48134	NA	NA	NA
P78417	GSTO1	Glutathione S-transferase omega-1 OS=Homo sapiens OX=9606 GN=GSTO1 PE=1 SV=2	0.902626	0.905446	0.979964	1.60225	1.04667	1.21681	1.12272	1.53188	1.06792	0.826336	1.09066	1.00382	1.08576	1.01319	0.983025	1.15237	1.01494	0.744994	0.913958	0.756756	0.71415	0.771533	0.661265	0.595428	1.42583	0.864178	1.22357	0.935494	1.11327	0.863399	1.07863	0.843465	0.649004	0.732195	1.07893	1.32271	1.04979	1.66071	1.48617	1.24091	1.04377	1.51121	0.962661	1.37611	0.957338	1.28735	1.10236
P78509	RELN	Reelin OS=Homo sapiens OX=9606 GN=RELN PE=1 SV=3	NA	NA	NA	NA	NA	NA	NA	NA	NA	NA	NA	NA	NA	NA	NA	NA	NA	NA	NA	NA	NA	NA	NA	NA	NA	NA	NA	NA	NA	NA	NA	NA	NA	NA	1.07646	1.31933	2.23442	2.29819	1.48	2.56401	2.08768	4.59193	3.05951	1.92039	NA	NA	NA
P78563	ADARB1	Double-stranded RNA-specific editase 1 OS=Homo sapiens OX=9606 GN=ADARB1 PE=1 SV=1	0.969693	1.12436	0.814395	1.01903	1.17552	1.01804	0.728449	1.21285	1.24436	1.52594	1.0629	1.86219	1.42939	1.44904	0.942719	0.90175	0.978809	0.934327	1.41657	2.32318	1.57964	1.14306	1.51079	0.902814	1.14084	1.10627	0.738567	0.867058	0.992748	1.56201	0.772068	0.615999	0.631432	0.608614	1.14037	0.617452	1.16417	2.2966	1.43654	1.46449	0.731434	0.900876	1.21892	0.995436	2.24373	0.841888	0.763659
P80108	GPLD1	Phosphatidylinositol-glycan-specific phospholipase D OS=Homo sapiens OX=9606 GN=GPLD1 PE=1 SV=3	0.856723	0.710743	0.772229	0.722615	1.00919	0.760542	0.774426	0.68411	0.754033	0.889952	0.7607	0.74976	0.886505	0.963863	0.777923	0.958599	0.854054	0.882397	0.716382	0.814395	0.807761	1.00703	0.935364	1.18542	0.989862	1.25536	0.909597	0.86322	1.05651	1.07512	0.932516	1.01924	1.04804	0.949935	1.09407	1.20807	1.1332	1.1599	1.21799	1.38415	1.02292	1.14282	1.09021	1.2179	1.00619	1.33154	1.48319
P80188	LCN2	Neutrophil gelatinase-associated lipocalin OS=Homo sapiens OX=9606 GN=LCN2 PE=1 SV=2	0.742262	0.919231	1.32235	1.54993	0.902501	0.853995	1.07773	1.95572	0.801459	0.862502	0.831795	0.926588	1.13265	1.12412	0.980643	0.901188	0.779597	0.997992	1.18165	1.16046	1.11775	1.06555	1.2285	1.09756	1.28227	1.09293	1.07796	1.23945	0.971846	1.03218	0.957205	1.23902	1.21352	0.942589	0.814959	0.928452	0.692699	0.667574	0.738106	0.809386	0.893661	0.636309	0.946911	0.762601	NA	NA	NA
P80297	MT1X	Metallothionein-1X OS=Homo sapiens OX=9606 GN=MT1X PE=1 SV=1	1.06326	1.39862	1.73243	2.93589	1.30288	1.32391	2.464	3.1806	0.676799	1.02925	0.747217	1.29164	0.713705	0.918786	1.17202	1.11466	1.09589	0.659663	1.70303	0.916559	1.12109	1.04326	0.78933	0.65302	NA	NA	NA	NA	NA	NA	NA	NA	NA	NA	NA	NA	NA	NA	NA	NA	NA	NA	NA	NA	NA	NA	NA
P80511	S100A12	Protein S100-A12 OS=Homo sapiens OX=9606 GN=S100A12 PE=1 SV=2	0.822849	1.0344	1.43555	1.29217	1.25998	3.81557	1.58909	1.06666	NA	NA	NA	NA	NA	NA	NA	NA	NA	NA	NA	NA	NA	NA	NA	NA	NA	NA	NA	NA	NA	NA	NA	NA	NA	NA	NA	NA	NA	NA	NA	NA	NA	NA	NA	NA	NA	NA	NA
P80723	BASP1	Brain acid soluble protein 1 OS=Homo sapiens OX=9606 GN=BASP1 PE=1 SV=2	0.851513	0.944027	1.03261	0.972116	1.06858	1.56341	1.04268	1.36604	0.791028	0.830815	1.1869	1.22799	1.19549	0.790151	0.549008	2.25824	0.945402	1.24393	1.09331	1.11644	1.25214	1.25405	1.19706	1.17406	1.13627	1.20197	1.21605	1.05482	0.907456	1.12514	1.13501	1.16498	1.05212	1.12451	NA	NA	NA	NA	NA	NA	NA	NA	NA	NA	NA	NA	NA
P80748	IGLV3-21	Immunoglobulin lambda variable 3-21 OS=Homo sapiens OX=9606 GN=IGLV3-21 PE=1 SV=2	1.32804	1.59328	1.4102	1.06039	0.958932	1.09634	0.891558	1.08013	0.873512	1.11682	0.843582	0.74072	1.16425	1.15733	1.01515	0.825992	0.942915	1.07073	1.3422	1.33867	1.14021	0.709316	1.0208	0.829147	0.761122	0.758489	1.16086	2.51124	0.903815	1.15701	0.974409	0.701201	0.95767	0.862502	0.983298	0.969491	0.617025	0.520475	0.738669	0.731992	0.928903	0.869043	0.772818	0.67329	0.661953	0.625291	0.787635
P81172	HAMP	Hepcidin OS=Homo sapiens OX=9606 GN=HAMP PE=1 SV=2	1.0403	1.25145	1.16159	1.01734	1.42494	1.35623	1.16902	1.14536	0.762654	0.845865	0.842822	0.85928	1.07386	0.967075	0.873149	0.849626	NA	NA	NA	NA	NA	NA	NA	NA	NA	NA	NA	NA	NA	NA	NA	NA	NA	NA	NA	NA	NA	NA	NA	NA	NA	NA	NA	NA	NA	NA	NA
P98160	HSPG2	Basement membrane-specific heparan sulfate proteoglycan core protein OS=Homo sapiens OX=9606 GN=HSPG2 PE=1 SV=4	0.766682	0.886136	0.896142	0.848214	1.0946	1.07602	1.08125	1.19127	1.02584	1.06076	0.95429	0.976709	1.14973	1.18838	0.983502	0.920379	1.09354	1.18805	0.978877	0.953563	1.04804	0.960528	1.15149	1.00779	0.998338	1.23825	1.14037	1.05731	1.08787	1.13438	1.16336	1.05343	1.00146	1.10428	1.09104	0.960329	0.805524	0.639759	0.772818	0.829722	0.939979	0.900002	0.645908	0.675019	NA	NA	1.40942
P98171	ARHGAP4	Rho GTPase-activating protein 4 OS=Homo sapiens OX=9606 GN=ARHGAP4 PE=1 SV=2	NA	NA	NA	NA	NA	NA	NA	NA	1.03505	0.995781	1.19806	1.09809	1.1717	1.51992	1.41167	1.05081	0.966472	1.00486	0.887365	0.721965	1.1176	1.16465	1.11203	0.984048	NA	NA	NA	NA	NA	NA	NA	NA	NA	NA	NA	NA	NA	NA	NA	NA	NA	NA	NA	NA	NA	NA	NA
Q00796	SORD	Sorbitol dehydrogenase OS=Homo sapiens OX=9606 GN=SORD PE=1 SV=4	NA	NA	NA	NA	NA	NA	NA	NA	NA	NA	NA	NA	NA	NA	NA	NA	1.55025	1.0844	1.47437	0.975085	0.700618	1.90792	0.732043	0.678114	NA	NA	NA	NA	NA	NA	NA	NA	NA	NA	NA	NA	NA	NA	NA	NA	NA	NA	NA	NA	NA	NA	NA
Q01459	CTBS	Di-N-acetylchitobiase OS=Homo sapiens OX=9606 GN=CTBS PE=1 SV=1	0.881908	0.79504	0.862741	0.996609	0.927359	0.743137	0.848626	0.99268	0.834567	1.02406	0.918722	1.14322	0.754922	1.03605	0.671565	0.957736	0.75278	0.880015	0.742571	0.879649	0.847567	0.966673	0.645684	0.834162	0.948619	1.1354	0.799073	0.793994	0.796916	0.964264	1.06555	1.25102	1.15365	1.23713	1.05431	0.953893	1.11791	0.946254	0.937766	0.991785	0.977386	0.916369	1.00954	0.958998	1.20623	0.83047	1.13627
Q01518	CAP1	Adenylyl cyclase-associated protein 1 OS=Homo sapiens OX=9606 GN=CAP1 PE=1 SV=5	NA	NA	NA	NA	NA	NA	NA	NA	1.12857	0.786054	0.970365	0.861486	0.852339	0.820912	0.885829	0.854765	1.03033	0.652071	0.713854	1.07133	1.00716	1.28458	0.829032	1.09399	1.11219	0.917385	0.936337	1.15517	1.30423	1.03419	0.928774	1.55079	0.910165	1.6245	0.635164	1.72824	1.03505	2.04627	0.735094	1.07945	0.950923	1.75893	1.31987	1.97411	1.26804	1.28601	1.141
Q01813	PFKP	ATP-dependent 6-phosphofructokinase, platelet type OS=Homo sapiens OX=9606 GN=PFKP PE=1 SV=2	NA	NA	NA	NA	NA	NA	NA	NA	NA	NA	NA	NA	NA	NA	NA	NA	0.582205	0.817109	0.608277	0.591643	0.696985	0.720065	0.661677	0.726281	0.795867	0.782303	1.32869	0.861427	1.46196	0.977996	0.814225	0.908715	0.941348	0.776953	1.35981	1.56873	1.13855	1.68997	1.09066	1.26295	1.22833	1.90198	1.55412	1.88009	1.18362	1.79253	1.78931
Q01973	ROR1	Inactive tyrosine-protein kinase transmembrane receptor ROR1 OS=Homo sapiens OX=9606 GN=ROR1 PE=1 SV=2	NA	NA	NA	NA	NA	NA	NA	NA	NA	NA	NA	NA	NA	NA	NA	NA	1.43177	1.08103	0.72744	0.732144	0.910354	0.876545	1.51131	1.21428	1.21008	1.24496	0.787963	1.15701	0.945075	1.17454	0.765195	0.906262	1.08343	1.09475	1.43177	1.12763	2.58811	1.5791	2.09682	1.94693	1.53273	1.06363	1.67725	1.15277	1.99419	1.4707	1.95058
Q01995	TAGLN	Transgelin OS=Homo sapiens OX=9606 GN=TAGLN PE=1 SV=4	0.745562	0.557908	4.07472	2.19117	1.43754	1.3491	2.09696	2.71716	NA	NA	NA	NA	NA	NA	NA	NA	NA	NA	NA	NA	NA	NA	NA	NA	NA	NA	NA	NA	NA	NA	NA	NA	NA	NA	NA	NA	NA	NA	NA	NA	NA	NA	NA	NA	NA	NA	NA
Q02224	CENPE	Centromere-associated protein E OS=Homo sapiens OX=9606 GN=CENPE PE=1 SV=2	1.01494	1.42158	1.6007	0.850746	0.85803	0.730472	0.784693	0.742519	0.943831	0.922103	0.921847	0.951582	1.18526	1.34443	1.32767	1.35257	0.6939	0.841538	0.507859	0.552329	0.86316	1.08207	1.05629	0.788127	1.27606	1.24989	0.712766	1.08583	0.935818	1.0309	0.943242	0.915861	0.884786	0.869706	1.5389	1.18009	0.974612	0.771052	1.14203	1.06777	1.25876	1.09733	1.03118	1.23456	1.085	0.67329	1.40854
Q02818	NUCB1	Nucleobindin-1 OS=Homo sapiens OX=9606 GN=NUCB1 PE=1 SV=4	0.924471	1.41402	1.89015	1.33025	1.33607	1.52499	1.57954	1.47406	0.758121	0.796364	0.862622	1.77892	0.893475	0.953827	0.99516	0.966539	1.11767	1.23679	1.15837	1.00076	1.07564	1.02619	1.08885	0.853463	0.730775	0.590251	1.00605	0.701298	0.667574	0.678867	0.947304	0.696889	0.874664	0.566167	0.707695	0.43167	1.23251	0.417515	0.374231	0.277758	0.373842	0.387213	0.505296	0.333302	0.805078	0.403712	0.579106
Q02985	CFHR3	Complement factor H-related protein 3 OS=Homo sapiens OX=9606 GN=CFHR3 PE=1 SV=2	0.895646	1.02215	1.0172	0.625291	1.32391	1.24798	1.31969	1.61855	0.85518	0.904442	1.15261	1.18772	1.36964	1.87475	1.86258	1.14211	1.0495	1.28156	0.970971	0.960795	1.13351	1.04362	1.63921	1.49713	0.977047	1.10496	1.13501	1.7692	0.958134	1.07549	1.49164	1.32896	1.15773	1.01473	0.444113	0.290498	0.625811	0.227069	0.214032	0.174355	0.416705	0.244838	0.336575	0.207287	0.191883	0.149799	0.12745
Q03154	ACY1	Aminoacylase-1 OS=Homo sapiens OX=9606 GN=ACY1 PE=1 SV=1	1.64844	0.592916	0.863699	0.729106	1.14258	1.19582	1.18559	0.799572	0.915543	0.65738	0.744323	0.977386	1.12054	0.95568	1.17838	1.08696	1.53858	1.10129	1.2551	1.2812	1.1837	1.23251	1.17944	1.33951	0.689633	0.937636	0.83503	1.27147	1.12779	2.62369	1.19334	1.2518	1.84076	0.365945	NA	NA	NA	NA	NA	NA	NA	NA	NA	NA	NA	NA	NA
Q03591	CFHR1	Complement factor H-related protein 1 OS=Homo sapiens OX=9606 GN=CFHR1 PE=1 SV=2	0.724572	0.90369	1.10213	0.676846	1.27156	1.53805	1.4025	0.77663	0.983707	1.00793	1.0811	1.25292	1.0924	1.44653	1.27668	1.01143	1.4575	1.6465	1.52478	1.54885	1.37774	1.22417	1.85832	1.85536	1.26734	1.34304	0.78649	0.861964	1.13414	1.26208	1.33728	1.25336	1.00424	0.949869	0.693852	0.528692	0.499896	0.308128	0.523623	0.439154	0.640025	0.420273	0.534922	0.424784	0.485788	0.5413	0.74149
Q04721	NOTCH2	Neurogenic locus notch homolog protein 2 OS=Homo sapiens OX=9606 GN=NOTCH2 PE=1 SV=3	0.818639	0.883376	0.82582	0.563896	0.891434	0.876241	0.820116	1.2886	0.982003	1.0629	1.11034	1.07631	0.973532	1.00626	0.921209	0.872665	1.07691	1.73869	1.10473	1.31349	1.61027	1.11142	1.52816	1.47447	0.859459	0.747114	1.02484	1.04254	0.980303	1.42415	0.912882	0.733211	1.08395	0.786272	NA	NA	NA	NA	NA	NA	NA	NA	NA	NA	NA	NA	NA
Q04756	HGFAC	Hepatocyte growth factor activator OS=Homo sapiens OX=9606 GN=HGFAC PE=1 SV=1	0.868261	0.841013	0.994953	0.907016	1.00479	0.828285	0.95033	0.99103	1.09946	1.20447	1.15501	1.06947	1.01136	1.21462	1.07192	0.995574	1.16635	1.22867	1.19947	1.09901	1.05066	1.28191	1.24177	1.56656	1.14013	1.47652	0.829837	1.15205	1.02676	1.33173	1.2441	1.56569	1.35877	1.42296	1.01995	0.955813	0.868923	0.990892	0.924791	1.05775	1.00919	1.22027	1.06025	1.37154	0.69989	0.962728	1.01953
Q04917	YWHAH	14-3-3 protein eta OS=Homo sapiens OX=9606 GN=YWHAH PE=1 SV=4	0.97468	0.572045	0.947042	1.14758	1.04608	0.976709	0.839266	0.932839	NA	NA	NA	NA	NA	NA	NA	NA	1.03197	1.19325	0.977115	0.932904	0.91904	0.80107	0.729308	0.79471	1.00298	0.827712	1.05387	0.770091	1.37326	0.815185	0.715885	0.617452	0.704612	0.805804	1.04023	0.817392	1.03994	0.897448	0.79769	0.790425	1.00479	0.823363	0.946845	0.693996	1.36122	0.989931	0.991785
Q05682	CALD1	Caldesmon OS=Homo sapiens OX=9606 GN=CALD1 PE=1 SV=3	NA	NA	NA	NA	NA	NA	NA	NA	1.3743	0.864717	1.43604	1.29828	1.53794	0.885461	1.06614	0.970904	1.09695	1.12748	0.906011	0.999099	1.03987	1.08252	0.990549	1.14338	1.43664	1.34966	1.14369	1.53805	1.14926	1.34677	1.06032	1.55143	1.3064	1.74267	0.904756	1.90845	1.12086	2.34567	1.39204	1.13367	1.91083	2.37199	1.51068	2.67382	0.981595	1.499	1.08998
Q06033	ITIH3	Inter-alpha-trypsin inhibitor heavy chain H3 OS=Homo sapiens OX=9606 GN=ITIH3 PE=1 SV=2	0.970836	1.17105	1.23362	1.15805	1.2115	1.48566	1.33848	1.27412	0.927745	0.837465	1.12405	1.24677	1.21268	1.49485	1.41883	0.910165	1.24885	1.30586	1.06216	1.01727	1.29747	1.01277	1.23997	1.05995	1.09051	0.819377	1.33062	1.35257	0.981459	0.867418	1.66152	1.31085	0.864178	0.768757	1.29729	0.726382	1.44954	0.663285	1.11358	0.730117	1.26427	0.810621	0.978538	0.592629	1.46267	0.597454	0.849803
Q06141	REG3A	Regenerating islet-derived protein 3-alpha OS=Homo sapiens OX=9606 GN=REG3A PE=1 SV=1	0.754138	0.886873	0.97306	0.766257	0.980779	0.987875	1.09543	1.45963	NA	NA	NA	NA	NA	NA	NA	NA	NA	NA	NA	NA	NA	NA	NA	NA	NA	NA	NA	NA	NA	NA	NA	NA	NA	NA	NA	NA	NA	NA	NA	NA	NA	NA	NA	NA	NA	NA	NA
Q06830	PRDX1	Peroxiredoxin-1 OS=Homo sapiens OX=9606 GN=PRDX1 PE=1 SV=1	0.797137	0.813605	1.20941	2.12918	0.874724	1.0108	0.722215	0.991442	0.980779	1.00723	0.992955	0.950132	0.955879	0.876241	0.81383	1.26103	1.07393	0.939132	0.939458	0.87194	1.03283	0.978742	0.914592	0.884724	1.2861	0.866517	0.90689	0.968215	0.948882	0.847156	0.801459	0.955349	0.754138	0.957139	0.792894	1.08403	0.793059	1.13721	0.948487	0.898008	0.907771	1.20614	0.717326	1.16135	1.22349	1.32143	1.38453
Q07283	TCHH	Trichohyalin OS=Homo sapiens OX=9606 GN=TCHH PE=1 SV=2	0.545178	0.649724	0.685201	0.937571	0.684916	0.791576	0.734381	0.768491	1.11296	1.10934	1.38194	1.34108	1.76406	2.10687	1.76198	1.53517	0.379797	0.490866	0.406943	0.392836	0.468169	0.632659	0.450313	0.625551	1.59273	1.65164	1.07587	1.44483	1.05088	1.33367	1.23799	1.4063	1.34453	1.4102	NA	NA	NA	NA	NA	NA	NA	NA	NA	NA	NA	NA	NA
Q07507	DPT	Dermatopontin OS=Homo sapiens OX=9606 GN=DPT PE=1 SV=2	0.819434	0.935105	1.00493	0.662779	0.985686	0.927938	1.15541	0.980915	NA	NA	NA	NA	NA	NA	NA	NA	NA	NA	NA	NA	NA	NA	NA	NA	NA	NA	NA	NA	NA	NA	NA	NA	NA	NA	NA	NA	NA	NA	NA	NA	NA	NA	NA	NA	NA	NA	NA
Q07954	LRP1	Prolow-density lipoprotein receptor-related protein 1 OS=Homo sapiens OX=9606 GN=LRP1 PE=1 SV=2	0.921336	1.03483	1.15629	0.910165	1.1765	0.971779	1.04848	0.971846	0.804966	0.838859	0.858387	1.06334	0.839964	0.947501	0.848861	0.882275	0.966606	1.05307	1.43674	1.51624	1.19433	1.18657	1.15701	1.06681	1.05548	1.01438	1.25597	0.980643	0.95973	1.02961	1.2564	1.09962	1.02783	0.857495	2.08855	1.4991	0.954555	0.85928	0.940174	0.988491	0.976641	0.788619	0.973329	0.767533	1.01508	0.925561	0.952572
Q07960	ARHGAP1	Rho GTPase-activating protein 1 OS=Homo sapiens OX=9606 GN=ARHGAP1 PE=1 SV=1	0.70023	0.49005	0.621273	0.738874	0.564678	0.483839	0.607308	0.541675	1.23679	0.785237	1.18067	0.748306	1.11992	0.917131	0.953166	0.854765	1.72967	0.936207	0.870973	0.716332	0.928066	0.971038	0.609374	0.655651	1.21529	0.862921	0.850628	0.928388	1.15069	1.29226	0.675159	0.989588	0.953365	1.24479	1.21033	1.28654	1.03756	1.05044	1.0479	0.859042	0.981323	1.02861	0.736011	0.750123	1.22833	1.32097	1.36075
Q08257	CRYZ	Quinone oxidoreductase OS=Homo sapiens OX=9606 GN=CRYZ PE=1 SV=1	NA	NA	NA	NA	NA	NA	NA	NA	NA	NA	NA	NA	NA	NA	NA	NA	1.57113	0.834047	2.62224	1.3806	0.900501	0.938286	0.862024	0.844459	NA	NA	NA	NA	NA	NA	NA	NA	NA	NA	NA	NA	NA	NA	NA	NA	NA	NA	NA	NA	NA	NA	NA
Q08380	LGALS3BP	Galectin-3-binding protein OS=Homo sapiens OX=9606 GN=LGALS3BP PE=1 SV=1	0.5837	0.87043	1.14361	0.865857	0.889521	1.03061	0.868622	0.788947	0.87971	0.888104	0.972588	1.21184	1.31421	1.56699	1.48916	1.04239	1.19673	1.09278	0.812421	0.790041	0.952176	0.830355	1.58238	1.04131	1.42001	1.02115	1.06238	1.00633	1.15845	0.960728	1.40981	1.54735	1.11628	1.03018	1.64547	1.00173	1.57527	0.750383	2.00083	1.30306	1.40318	1.06599	0.90985	0.650851	1.20941	0.851395	1.12779
Q08830	FGL1	Fibrinogen-like protein 1 OS=Homo sapiens OX=9606 GN=FGL1 PE=1 SV=3	0.721414	0.725325	1.40737	0.835783	1.34723	1.6915	3.09513	0.913451	0.746493	0.702368	0.661265	1.37364	0.677222	1.25032	1.1152	0.7733	1.80175	0.870973	0.747736	0.887611	1.35182	0.691212	1.6776	0.616982	0.651122	0.775286	1.1281	0.985208	0.841305	0.64403	2.16565	1.08478	0.939067	0.65779	NA	NA	NA	NA	NA	NA	NA	NA	NA	NA	3.32303	0.777816	1.12233
Q10588	BST1	ADP-ribosyl cyclase/cyclic ADP-ribose hydrolase 2 OS=Homo sapiens OX=9606 GN=BST1 PE=1 SV=2	0.867058	1.04863	1.00076	0.918913	0.735501	0.754085	0.666049	0.886013	1.20039	0.983093	1.00007	1.36037	1.07007	1.27925	1.06415	1.03821	NA	NA	NA	NA	NA	NA	NA	NA	NA	NA	NA	NA	NA	NA	NA	NA	NA	NA	NA	NA	NA	NA	NA	NA	NA	NA	NA	NA	NA	NA	NA
Q12794	HYAL1	Hyaluronidase-1 OS=Homo sapiens OX=9606 GN=HYAL1 PE=1 SV=2	NA	NA	NA	NA	NA	NA	NA	NA	0.978131	1.0339	0.723367	0.959796	0.861666	1.04834	0.940761	1.00187	0.901188	0.920443	0.941217	0.887857	0.845924	0.975626	1.05673	0.966338	NA	NA	NA	NA	NA	NA	NA	NA	NA	NA	1.08726	1.06799	1.68623	1.02655	1.01417	1.18855	0.919423	1.10145	1.15461	1.20756	1.71404	1.70527	1.93576
Q12805	EFEMP1	EGF-containing fibulin-like extracellular matrix protein 1 OS=Homo sapiens OX=9606 GN=EFEMP1 PE=1 SV=2	1.01523	1.12678	1.15685	1.29999	1.12225	1.19914	1.26611	1.19773	0.777061	0.819605	0.768597	0.88497	0.951318	1.02122	1.00361	1.0339	1.27589	1.24556	1.01234	1.02975	1.24842	1.29047	1.50035	1.50493	0.901875	1.02854	1.01396	1.06829	0.992336	0.940305	1.21849	1.04964	1.11946	1.0179	1.62237	1.26663	1.5111	1.12008	1.01755	1.12654	1.11659	1.0787	0.962528	0.967679	1.14092	1.03469	1.03218
Q12841	FSTL1	Follistatin-related protein 1 OS=Homo sapiens OX=9606 GN=FSTL1 PE=1 SV=1	0.999653	1.28378	1.43485	1.30477	1.04783	1.15341	1.34099	1.33515	0.980915	1.24539	1.06363	1.16603	1.14631	1.09225	1.15861	1.04725	NA	NA	NA	NA	NA	NA	NA	NA	0.988765	1.08343	1.65004	1.05387	0.886197	1.00612	1.16991	1.43664	1.39397	1.15613	NA	NA	NA	NA	NA	NA	NA	NA	NA	NA	NA	NA	NA
Q12860	CNTN1	Contactin-1 OS=Homo sapiens OX=9606 GN=CNTN1 PE=1 SV=1	0.776738	0.708726	0.656424	0.600277	0.900751	0.727087	0.907016	1.2174	0.874118	0.927552	0.752363	0.708579	0.668176	0.712124	0.733262	0.645594	0.823705	0.776577	0.841363	0.776307	0.79935	1.11003	0.818526	1.19549	0.920762	1.0968	0.747114	0.848508	0.742982	0.892671	1.06194	1.0844	1.05541	0.96929	1.1098	0.827023	1.40415	0.840256	1.16716	1.13218	1.06999	0.722165	1.01939	0.731282	1.10267	1.09885	0.998615
Q12866	MERTK	Tyrosine-protein kinase Mer OS=Homo sapiens OX=9606 GN=MERTK PE=1 SV=2	NA	NA	NA	NA	NA	NA	NA	NA	NA	NA	NA	NA	NA	NA	NA	NA	NA	NA	NA	NA	NA	NA	NA	NA	1.06378	0.89131	1.16821	0.85441	1.01685	0.984525	0.976099	1.07073	0.982072	0.962594	NA	NA	NA	NA	NA	NA	NA	NA	NA	NA	NA	NA	NA
Q12907	LMAN2	Vesicular integral-membrane protein VIP36 OS=Homo sapiens OX=9606 GN=LMAN2 PE=1 SV=1	1.0421	1.131	1.21419	1.01875	1.24384	1.56374	1.23063	1.34192	1.2291	0.751164	0.928388	0.966271	1.32749	1.38934	1.1687	0.980507	0.664573	0.848273	0.613145	0.62343	0.746027	0.752258	1.01122	1.64342	1.2518	1.01101	0.957471	1.70149	1.20289	1.18978	1.29936	1.29972	4.51367	2.49718	0.983638	1.14227	1.29012	1.24048	1.13343	1.6172	1.73075	0.935948	1.41392	1.28761	NA	NA	NA
Q12913	PTPRJ	Receptor-type tyrosine-protein phosphatase eta OS=Homo sapiens OX=9606 GN=PTPRJ PE=1 SV=3	NA	NA	NA	NA	NA	NA	NA	NA	NA	NA	NA	NA	NA	NA	NA	NA	1.2422	1.16983	1.0549	1.1778	0.963262	0.925946	0.971509	0.940109	1.21917	1.1487	1.00271	1.02094	0.960728	1.13658	1.00104	1.03936	1.09627	1.18124	0.971779	0.78709	0.878735	0.688582	0.837406	0.803572	0.823762	0.808601	0.755446	0.708186	1.0949	1.33802	1.11853
Q13093	PLA2G7	Platelet-activating factor acetylhydrolase OS=Homo sapiens OX=9606 GN=PLA2G7 PE=1 SV=1	0.709463	1.0823	1.13398	0.636001	0.955945	1.1169	1.21655	1.17666	0.657927	0.745355	0.675534	0.814508	0.856426	0.954952	0.930385	0.812309	1.13304	1.56569	1.07691	1.06069	1.2447	1.3551	1.46429	1.35191	1.41627	1.47857	0.680327	0.630645	1.06696	1.17846	1.64046	2.04146	1.46632	1.9472	2.06065	1.5708	1.241	1.29298	1.20631	1.43167	1.39755	1.64091	1.2291	1.58755	NA	NA	NA
Q13103	SPP2	Secreted phosphoprotein 24 OS=Homo sapiens OX=9606 GN=SPP2 PE=1 SV=1	1.16845	0.34215	0.589106	1.0838	1.27987	0.882458	0.943962	0.444298	NA	NA	NA	NA	NA	NA	NA	NA	0.993988	0.547374	0.511285	0.868983	1.082	1.55218	2.00931	3.09685	0.902876	1.2571	0.982344	0.859518	1.21025	1.05395	1.29585	0.994263	2.10979	0.931611	0.914148	1.67018	1.24496	1.92439	0.830873	1.69138	1.09634	1.73821	1.43495	1.35811	1.45005	1.62372	1.47243
Q13201	MMRN1	Multimerin-1 OS=Homo sapiens OX=9606 GN=MMRN1 PE=1 SV=3	1.43525	1.21495	1.0324	1.03663	0.979013	0.815694	0.848567	0.781707	1.41343	1.41098	1.18075	1.37669	1.06003	1.17292	0.943569	1.26505	1.58249	0.677879	0.87843	0.973532	1.51666	1.4063	1.06918	0.846569	1.21512	0.878491	0.884173	1.09346	1.05907	0.82731	1.11042	1.64661	1.14727	1.01586	1.19756	0.908526	1.13863	0.987122	1.57483	1.55423	1.16223	1.00118	1.44884	1.10642	0.808489	0.850687	1.1332
Q13228	SELENBP1	Methanethiol oxidase OS=Homo sapiens OX=9606 GN=SELENBP1 PE=1 SV=2	0.99903	1.4709	1.58206	3.29254	1.45478	1.31121	1.31067	2.06208	0.81214	0.930192	0.745665	0.949803	0.892856	0.956608	0.983979	1.41804	1.38761	1.63184	1.44333	1.02925	1.06858	0.900189	1.13273	1.85112	1.10297	1.17349	1.00982	1.0344	1.06918	1.16554	1.19168	1.3723	0.974139	0.835725	1.64342	1.03613	1.07983	0.61553	0.925112	1.07073	0.675159	0.941283	0.73872	0.609543	NA	NA	NA
Q13332	PTPRS	Receptor-type tyrosine-protein phosphatase S OS=Homo sapiens OX=9606 GN=PTPRS PE=1 SV=3	NA	NA	NA	NA	NA	NA	NA	NA	1.05387	1.06918	0.869345	0.789932	0.735145	0.716233	0.689441	0.687485	0.953497	0.858149	0.730117	0.632002	0.842413	1.00996	0.913705	1.05988	NA	NA	NA	NA	NA	NA	NA	NA	NA	NA	0.916305	0.963997	1.02719	0.927552	0.843114	0.979828	1.03929	1.34155	0.875938	0.906953	NA	NA	NA
Q13349	ITGAD	Integrin alpha-D OS=Homo sapiens OX=9606 GN=ITGAD PE=1 SV=2	1.32363	1.18707	0.818866	0.681649	1.01129	0.788509	0.644075	0.853285	1.20681	1.499	1.15373	0.970702	1.21537	0.99516	0.776523	0.727743	1.52393	1.75358	1.50629	1.44744	0.812703	0.428124	1.09217	1.02733	0.4427	0.488456	0.637148	0.5816	1.52965	1.83821	1.30749	1.20531	0.99268	0.882642	1.24591	0.850982	0.475494	0.371749	0.338447	0.303128	1.03491	0.78933	1.64947	1.4903	1.22476	0.546692	1.13595
Q13416	ORC2	Origin recognition complex subunit 2 OS=Homo sapiens OX=9606 GN=ORC2 PE=1 SV=2	0.547944	0.62037	0.597703	0.693179	1.11234	0.859935	0.889028	0.733414	0.875877	0.965669	1.19906	1.00125	1.33672	1.42326	1.27447	1.80613	0.546995	1.00982	0.565109	0.529683	0.529316	0.825534	0.73739	1.18271	1.06091	1.40337	0.986848	1.01319	1.13721	1.55014	1.04964	1.38137	1.98467	2.51751	1.47652	1.40981	1.08606	1.2349	1.8055	2.01866	1.48494	1.79776	1.0896	1.53358	1.20807	2.19527	1.13265
Q13418	ILK	Integrin-linked protein kinase OS=Homo sapiens OX=9606 GN=ILK PE=1 SV=2	NA	NA	NA	NA	NA	NA	NA	NA	1.86154	0.533034	0.75278	0.634152	0.472603	0.65497	0.407904	0.398983	1.1108	0.611574	0.546389	0.69102	0.851159	1.16264	0.657836	0.986575	0.945271	1.0717	0.978131	0.517991	1.52732	0.776307	0.784802	0.548704	1.05907	0.826737	0.794765	2.52433	1.02165	3.0428	1.00459	1.49123	1.18353	3.04998	1.50045	3.07951	1.17462	1.67795	1.6895
Q13421	MSLN	Mesothelin OS=Homo sapiens OX=9606 GN=MSLN PE=1 SV=2	0.478835	0.70647	0.628332	0.866637	0.861905	0.981391	0.812872	0.805134	0.978063	1.14393	1.2023	1.1303	1.07781	1.23302	1.09437	1.02137	0.81915	1.23157	0.842472	0.814395	1.10542	0.924727	1.12086	1.27315	0.907016	0.91764	1.10183	1.44583	0.920315	1.05643	1.19565	1.3551	0.976235	1.17764	NA	NA	NA	NA	NA	NA	NA	NA	NA	NA	NA	NA	NA
Q13477	MADCAM1	Mucosal addressin cell adhesion molecule 1 OS=Homo sapiens OX=9606 GN=MADCAM1 PE=1 SV=2	NA	NA	NA	NA	NA	NA	NA	NA	0.903314	1.16886	0.872121	0.85803	1.22697	1.01628	0.975085	0.748098	NA	NA	NA	NA	NA	NA	NA	NA	NA	NA	NA	NA	NA	NA	NA	NA	NA	NA	0.826565	0.751841	1.55703	1.10826	0.911933	0.798797	0.732754	0.656106	0.692411	0.583215	1.13131	1.47355	1.5495
Q13508	ART3	Ecto-ADP-ribosyltransferase 3 OS=Homo sapiens OX=9606 GN=ART3 PE=1 SV=2	0.92646	0.901875	0.775877	1.27456	1.1299	1.02861	1.39803	1.88661	0.731891	0.921592	0.958134	0.955747	0.893909	0.980167	0.912945	0.945795	0.861069	0.806474	0.846159	0.879771	1.1042	0.942981	1.0016	1.21184	NA	NA	NA	NA	NA	NA	NA	NA	NA	NA	1.50608	1.25989	1.511	1.399	1.13241	1.30333	1.25614	1.09954	1.03505	1.04442	0.772175	0.949935	0.862144
Q13642	FHL1	Four and a half LIM domains protein 1 OS=Homo sapiens OX=9606 GN=FHL1 PE=1 SV=4	NA	NA	NA	NA	NA	NA	NA	NA	NA	NA	NA	NA	NA	NA	NA	NA	NA	NA	NA	NA	NA	NA	NA	NA	NA	NA	NA	NA	NA	NA	NA	NA	NA	NA	0.952308	1.76945	1.26813	2.29692	1.17919	1.8649	1.54671	2.27774	1.86296	2.66364	1.44143	1.24937	1.19839
Q13740	ALCAM	CD166 antigen OS=Homo sapiens OX=9606 GN=ALCAM PE=1 SV=2	0.98357	1.12537	1.34705	1.35529	0.99654	1.40454	1.32657	1.14298	0.994332	1.22876	1.05168	1.11845	1.22179	1.34481	1.25666	1.24902	1.08734	1.12319	1.06356	0.991854	1.05336	1.13761	0.870973	0.933809	NA	NA	NA	NA	NA	NA	NA	NA	NA	NA	1.32473	0.955084	1.35886	0.968887	1.17968	1.00431	1.64399	1.25275	1.04565	1.03304	0.685439	0.706911	0.868863
Q13790	APOF	Apolipoprotein F OS=Homo sapiens OX=9606 GN=APOF PE=1 SV=2	0.984457	1.12693	1.30686	0.853049	1.17007	1.61956	1.2441	0.977454	1.0442	1.09429	1.13014	1.02783	1.44443	1.45135	1.44203	0.88032	0.924663	1.10926	1.03354	0.875634	0.997784	0.929161	1.11884	0.966606	1.04841	0.905697	1.0984	0.98432	0.750748	0.837058	0.859399	0.849803	0.959198	0.958599	1.33765	1.38319	1.21773	0.861427	1.10504	1.28761	1.49692	1.45953	1.37326	0.657517	1.18026	0.992748	0.776254
Q13822	ENPP2	Ectonucleotide pyrophosphatase/phosphodiesterase family member 2 OS=Homo sapiens OX=9606 GN=ENPP2 PE=1 SV=3	0.831507	0.852399	1.08125	0.861964	1.12405	1.13721	1.17878	1.21344	1.09232	1.06659	0.894343	1.18173	0.556209	1.28183	1.03326	1.16813	1.18945	0.789987	0.746596	1.05966	1.12016	1.33432	1.47509	1.46054	0.661907	1.02335	0.894653	0.603238	0.923062	0.829262	1.45498	0.680846	1.16159	0.750227	0.827253	1.20164	1.01347	0.916559	0.845924	1.4209	1.10458	1.30215	0.932904	0.939393	1.33848	1.8065	1.11342
Q14019	COTL1	Coactosin-like protein OS=Homo sapiens OX=9606 GN=COTL1 PE=1 SV=3	NA	NA	NA	NA	NA	NA	NA	NA	1.43048	1.0694	1.23645	0.887119	1.04746	0.827769	0.736369	0.532038	1.00898	0.701055	0.759752	0.697275	1.13108	0.909976	0.833642	0.734635	1.8335	0.831276	0.843933	0.640069	1.46439	0.750488	0.52145	1.10826	0.7769	1.3743	1.44985	1.54778	1.24954	1.85305	1.56363	1.5017	1.36122	1.51698	1.69126	1.7783	1.25841	1.79577	1.19864
Q14118	DAG1	Dystroglycan OS=Homo sapiens OX=9606 GN=DAG1 PE=1 SV=2	0.818753	1.13942	1.13658	1.29262	0.986096	1.04153	1.30215	1.48123	1.04804	1.05548	1.1657	1.19499	1.03469	1.09142	1.11551	1.94693	0.937571	0.943046	0.929547	0.844694	0.968215	0.805189	1.35154	1.01382	0.865137	0.941544	1.1029	1.13682	0.981867	1.12397	1.03641	1.01452	1.01185	0.875088	1.11752	1.28485	1.69949	1.36453	0.964197	1.04218	1.24315	1.26822	1.45649	1.12132	NA	NA	NA
Q14126	DSG2	Desmoglein-2 OS=Homo sapiens OX=9606 GN=DSG2 PE=1 SV=2	0.888781	0.807369	1.05176	1.22095	1.27253	1.32998	1.28396	1.13461	0.921847	1.01797	0.919104	0.968752	0.903064	0.960795	0.944158	1.11528	0.746337	0.944485	0.852694	0.977318	0.857792	0.936921	1.62744	1.21327	0.870852	1.04485	1.12678	0.909408	1.03807	0.936986	1.08403	0.907142	1.14997	0.914085	1.11845	1.26444	1.05446	1.11427	1.02349	1.15109	1.20631	1.19814	0.907205	1.0362	1.35623	0.889336	1.06511
Q14247	CTTN	Src substrate cortactin OS=Homo sapiens OX=9606 GN=CTTN PE=1 SV=2	0.777384	0.684916	0.728348	0.884663	0.77733	0.636133	0.756651	0.677738	1.1321	0.64546	1.08147	0.573315	1.20556	0.464709	0.736675	0.174512	NA	NA	NA	NA	NA	NA	NA	NA	NA	NA	NA	NA	NA	NA	NA	NA	NA	NA	0.70232	1.28619	0.962261	1.47366	1.09916	0.81479	0.935234	1.35595	0.887304	1.24367	0.825248	1.19028	0.70125
Q14515	SPARCL1	SPARC-like protein 1 OS=Homo sapiens OX=9606 GN=SPARCL1 PE=1 SV=2	0.948027	0.910291	1.37145	1.46165	1.08998	0.978877	1.50598	1.34267	1.12568	1.21546	1.17903	1.25545	0.882581	1.09278	0.921784	1.19102	0.853581	0.925882	0.993988	0.947501	0.921464	0.932257	1.12117	1.09149	0.970164	1.04493	1.23499	0.952572	0.990824	0.926588	1.25414	0.963062	1.23902	0.911301	1.10405	0.990068	0.974004	0.720365	1.04841	1.07214	1.0799	0.9652	0.8679	0.950791	1.36955	1.10076	0.901313
Q14520	HABP2	Hyaluronan-binding protein 2 OS=Homo sapiens OX=9606 GN=HABP2 PE=1 SV=1	1.12311	1.14719	1.21951	0.934392	1.15741	1.20414	1.08809	0.985276	0.905383	1.01129	1.00912	1.09825	1.1214	1.3704	1.15109	1.10703	1.29244	1.22391	0.990343	1.01656	1.30704	1.2212	1.43346	1.44714	1.19823	1.17129	1.24108	1.33552	1.11915	1.32583	1.27359	1.24617	1.13974	1.23662	0.870732	0.696744	1.10872	0.74072	0.702709	0.775823	0.878309	0.779327	0.858982	0.668732	1.32813	0.983911	1.20522
Q14624	ITIH4	Inter-alpha-trypsin inhibitor heavy chain H4 OS=Homo sapiens OX=9606 GN=ITIH4 PE=1 SV=4	0.879649	1.00285	1.18781	1.04304	1.07237	1.24695	1.30613	1.0429	0.896702	0.887304	1.01038	1.1029	1.10711	1.32042	1.24816	0.930643	0.929998	1.0629	0.928388	0.893661	1.04384	0.869827	1.053	0.959131	1.06047	0.96413	1.07162	1.0921	0.877761	0.906325	1.07281	0.987053	0.933098	0.875209	1.20455	0.874845	1.1487	0.76961	1.06592	0.932063	1.25058	0.930772	1.06393	0.708923	1.23354	0.944551	0.938091
Q14697	GANAB	Neutral alpha-glucosidase AB OS=Homo sapiens OX=9606 GN=GANAB PE=1 SV=3	1.22434	1.06718	1.53379	2.08132	1.2158	1.3786	1.36179	1.2404	1.09232	1.1734	1.27713	1.25632	0.800459	1.02137	0.946189	0.918213	0.848626	1.00452	0.999446	1.0814	1.09771	1.02562	1.2251	1.29612	0.872423	1.01572	0.687485	0.453791	0.465677	0.295432	0.550113	0.426229	0.453885	0.294104	0.921975	1.11342	1.23183	1.14926	0.869224	1.03591	1.16433	1.36472	0.983911	1.00842	0.666603	0.625855	0.64345
Q14766	LTBP1	Latent-transforming growth factor beta-binding protein 1 OS=Homo sapiens OX=9606 GN=LTBP1 PE=1 SV=4	1.36264	1.42721	1.46561	1.65095	0.779381	0.591029	1.58425	1.75637	1.23516	1.36103	1.26637	1.29325	1.05132	1.13768	1.09748	0.954555	2.15054	0.920953	1.33432	1.35952	1.80913	1.99032	1.8035	1.9763	NA	NA	NA	NA	NA	NA	NA	NA	NA	NA	1.18386	1.39929	1.08245	1.61586	1.89961	1.97055	1.15021	1.46358	1.83121	1.71725	NA	NA	NA
Q14767	LTBP2	Latent-transforming growth factor beta-binding protein 2 OS=Homo sapiens OX=9606 GN=LTBP2 PE=1 SV=3	0.514984	0.611871	1.0538	1.00954	1.13895	0.787799	1.40786	0.817732	0.705442	1.13171	1.10895	1.33589	1.39813	1.08945	1.30242	1.11899	NA	NA	NA	NA	NA	NA	NA	NA	NA	NA	NA	NA	NA	NA	NA	NA	NA	NA	NA	NA	NA	NA	NA	NA	NA	NA	NA	NA	NA	NA	NA
Q14847	LASP1	LIM and SH3 domain protein 1 OS=Homo sapiens OX=9606 GN=LASP1 PE=1 SV=2	NA	NA	NA	NA	NA	NA	NA	NA	1.20105	0.828171	0.858506	1.03054	0.867298	0.894963	1.06851	0.793169	1.03083	0.940174	1.03133	1.08035	0.912502	1.07594	0.831622	1.02505	1.76908	1.059	1.04377	0.937441	1.22103	0.79935	0.966807	1.11443	1.06503	1.13422	0.778193	1.04153	0.938416	1.51666	1.05592	0.914212	0.968954	1.22731	1.36301	1.32675	0.363544	0.531632	0.35194
Q14956	GPNMB	Transmembrane glycoprotein NMB OS=Homo sapiens OX=9606 GN=GPNMB PE=1 SV=2	NA	NA	NA	NA	NA	NA	NA	NA	NA	NA	NA	NA	NA	NA	NA	NA	NA	NA	NA	NA	NA	NA	NA	NA	NA	NA	NA	NA	NA	NA	NA	NA	NA	NA	0.880381	0.905948	0.724572	0.671612	0.615018	0.833064	0.841888	0.742931	0.722766	0.783986	NA	NA	NA
Q15022	SUZ12	Polycomb protein SUZ12 OS=Homo sapiens OX=9606 GN=SUZ12 PE=1 SV=3	0.910291	0.884847	1.03936	1.00647	0.876727	1.0191	0.974139	0.682878	NA	NA	NA	NA	NA	NA	NA	NA	NA	NA	NA	NA	NA	NA	NA	NA	1.15621	1.02321	0.699114	0.780516	0.797027	0.994263	0.914021	1.27103	0.706127	0.938807	NA	NA	NA	NA	NA	NA	NA	NA	NA	NA	NA	NA	NA
Q15063	POSTN	Periostin OS=Homo sapiens OX=9606 GN=POSTN PE=1 SV=2	1.04196	0.958134	1.17715	1.3175	1.31376	1.41598	2.54665	1.65176	0.851808	0.904003	0.918531	1.13116	0.818696	0.90463	0.915099	1.18591	1.0009	1.08147	0.987806	0.854114	0.812478	1.23585	1.02151	1.19053	0.86808	1.08185	0.974139	1.62113	1.09013	1.10137	1.01277	1.39813	1.28726	1.19972	0.968215	0.963997	1.064	0.773782	0.985071	1.05907	1.10481	1.08832	0.645147	0.709316	0.994884	1.11173	1.2781
Q15077	P2RY6	P2Y purinoceptor 6 OS=Homo sapiens OX=9606 GN=P2RY6 PE=1 SV=1	NA	NA	NA	NA	NA	NA	NA	NA	NA	NA	NA	NA	NA	NA	NA	NA	0.929934	1.07118	1.05548	0.914085	1.78151	1.29855	8.57419	6.00432	NA	NA	NA	NA	NA	NA	NA	NA	NA	NA	NA	NA	NA	NA	NA	NA	NA	NA	NA	NA	NA	NA	NA
Q15084	PDIA6	Protein disulfide-isomerase A6 OS=Homo sapiens OX=9606 GN=PDIA6 PE=1 SV=1	0.847744	0.626462	0.932839	1.01579	0.872544	0.632615	0.882458	0.679102	1.24773	0.767692	1.07505	1.22061	0.767958	0.670961	0.773032	0.587883	1.56472	0.616939	0.920762	0.736062	1.0671	1.07751	0.673617	0.71668	1.15173	0.92492	0.961994	1.11311	1.18255	1.03555	0.980643	1.45609	1.01515	1.36443	0.560195	1.13485	0.827253	1.32924	0.679196	0.834104	1.07729	1.42899	0.801125	1.00661	1.65462	1.65737	1.15982
Q15113	PCOLCE	Procollagen C-endopeptidase enhancer 1 OS=Homo sapiens OX=9606 GN=PCOLCE PE=1 SV=2	1.17609	1.24203	1.49133	1.28994	1.76284	1.36311	1.91269	1.57309	1.17056	1.25327	1.05812	1.49526	1.10965	1.32345	1.2853	1.21234	0.753824	0.791302	1.08185	1.26734	1.01452	1.2886	1.23739	1.73015	1.00689	1.37259	1.1837	0.984048	1.02186	0.943111	1.11512	0.862323	1.5175	0.968417	0.921911	1.04928	1.0134	1.10305	0.770678	0.874785	1.24203	1.36415	1.11876	0.739899	1.63048	1.4709	1.36472
Q15154	PCM1	Pericentriolar material 1 protein OS=Homo sapiens OX=9606 GN=PCM1 PE=1 SV=5	0.779705	0.887365	0.607687	0.818129	0.904129	0.900501	0.756703	0.857852	0.988423	1.02406	1.02314	0.861785	1.27279	1.32216	1.33783	1.05959	1.02009	1.20364	1.14798	1.07587	1.04572	0.963529	0.972385	1.0191	0.959796	1.08028	1.16635	0.945861	1.13281	1.52488	0.972655	0.892733	1.16086	1.46846	1.40027	1.01305	1.1756	0.875634	1.58898	1.80363	1.76235	1.40903	0.865617	1.47867	0.986643	1.20372	0.794214
Q15166	PON3	Serum paraoxonase/lactonase 3 OS=Homo sapiens OX=9606 GN=PON3 PE=1 SV=3	0.526608	0.474408	0.534255	0.464999	0.846452	0.625204	0.656788	0.502327	0.862442	0.905948	0.804576	0.925433	0.777654	0.919231	0.781707	0.814733	0.743395	0.738157	0.907393	0.942393	0.713606	0.900002	0.872968	1.06047	0.863579	1.06341	0.959131	0.738362	0.917195	1.00271	0.903064	0.913895	1.1628	1.04369	0.857911	1.0385	0.962261	0.953431	1.02605	1.22103	1.12881	1.15013	0.779921	0.679573	0.983843	1.40201	1.16595
Q15365	PCBP1	Poly(rC)-binding protein 1 OS=Homo sapiens OX=9606 GN=PCBP1 PE=1 SV=2	NA	NA	NA	NA	NA	NA	NA	NA	1.66002	1.11018	1.43843	1.63263	1.23294	1.282	1.1743	1.14013	NA	NA	NA	NA	NA	NA	NA	NA	1.61317	1.24298	1.34555	1.27757	1.45498	1.21529	1.15109	0.765036	0.989245	0.955415	NA	NA	NA	NA	NA	NA	NA	NA	NA	NA	NA	NA	NA
Q15404	RSU1	Ras suppressor protein 1 OS=Homo sapiens OX=9606 GN=RSU1 PE=1 SV=3	0.940044	1.16772	0.889336	0.556094	0.932774	1.24505	0.580272	1.36226	2.2675	0.968148	1.46338	1.08207	1.05812	0.985413	0.930063	0.738311	1.57833	0.945533	0.893971	1.08298	1.12545	1.61083	0.987464	1.59052	1.80588	1.37031	1.18912	1.17887	2.01782	1.25319	0.991167	1.65542	1.23936	1.42296	1.07237	4.6641	1.37974	3.57812	2.4519	2.26812	1.72071	4.37566	2.75738	5.26305	1.32639	2.14073	1.40367
Q15485	FCN2	Ficolin-2 OS=Homo sapiens OX=9606 GN=FCN2 PE=1 SV=2	1.24928	0.547147	0.988286	1.19789	1.81164	2.00333	1.47417	0.73739	0.906639	0.80653	0.580191	1.14282	0.625204	1.22391	0.609585	0.7769	1.25501	0.814225	0.744271	1.18181	1.23705	1.36689	1.8264	1.54039	0.60714	1.42741	1.13139	0.519646	1.32537	0.511817	1.01038	0.52785	0.77389	0.557058	0.473062	0.890569	1.18214	1.09036	0.652251	0.936142	0.827712	0.988765	1.30812	1.13273	1.11713	1.23816	1.24643
Q15582	TGFBI	Transforming growth factor-beta-induced protein ig-h3 OS=Homo sapiens OX=9606 GN=TGFBI PE=1 SV=1	0.884663	0.991717	1.17129	0.959198	1.18756	1.50483	1.25145	1.21041	1.18534	1.0847	1.11404	1.21344	1.40444	1.50953	1.34239	1.21125	0.891063	1.24859	0.836188	0.826049	0.874845	0.889336	0.882519	0.819661	1.08065	1.0269	1.06696	0.966874	0.852339	0.861427	0.994953	0.930708	1.10788	1.09089	1.92266	1.32703	1.64513	1.04659	1.2492	1.11744	1.35651	1.05834	1.04406	0.938937	1.09574	0.828745	1.0487
Q15631	TSN	Translin OS=Homo sapiens OX=9606 GN=TSN PE=1 SV=1	NA	NA	NA	NA	NA	NA	NA	NA	NA	NA	NA	NA	NA	NA	NA	NA	1.24686	1.18255	1.15405	1.13493	0.998407	1.01551	0.964197	0.976776	NA	NA	NA	NA	NA	NA	NA	NA	NA	NA	NA	NA	NA	NA	NA	NA	NA	NA	NA	NA	NA	NA	NA
Q15691	MAPRE1	Microtubule-associated protein RP/EB family member 1 OS=Homo sapiens OX=9606 GN=MAPRE1 PE=1 SV=3	NA	NA	NA	NA	NA	NA	NA	NA	1.14266	0.864537	0.999099	1.03018	0.949342	1.13855	1.13265	1.15974	1.64137	0.613315	0.491444	0.761597	1.01396	1.15621	0.660852	0.928324	NA	NA	NA	NA	NA	NA	NA	NA	NA	NA	NA	NA	NA	NA	NA	NA	NA	NA	NA	NA	NA	NA	NA
Q15746	MYLK	Myosin light chain kinase, smooth muscle OS=Homo sapiens OX=9606 GN=MYLK PE=1 SV=4	NA	NA	NA	NA	NA	NA	NA	NA	1.18822	1.43227	0.923894	0.676518	1.21445	1.22748	1.63841	1.43187	NA	NA	NA	NA	NA	NA	NA	NA	NA	NA	NA	NA	NA	NA	NA	NA	NA	NA	1.05066	2.61534	1.0274	2.69858	1.34864	1.3383	1.09179	2.55726	1.69009	2.65167	NA	NA	NA
Q15828	CST6	Cystatin-M OS=Homo sapiens OX=9606 GN=CST6 PE=1 SV=1	2.65627	1.31649	3.79053	1.63535	1.18575	1.07729	1.81882	1.54093	1.56939	0.943373	1.82804	1.25954	0.9437	1.1479	1.07088	0.961527	1.55531	1.82716	1.32024	1.58118	1.2349	1.55122	1.81051	1.69937	1.38867	1.31421	1.93094	1.8451	1.11985	1.16886	1.64126	1.53507	1.39871	1.01248	NA	NA	NA	NA	NA	NA	NA	NA	NA	NA	NA	NA	NA
Q15848	ADIPOQ	Adiponectin OS=Homo sapiens OX=9606 GN=ADIPOQ PE=1 SV=1	1.02328	1.02904	0.9652	1.05176	1.26786	0.98678	0.847861	0.793884	0.791028	0.849096	0.833931	0.863878	0.758436	0.738567	0.622567	0.725476	1.50493	1.44874	0.879893	0.81462	1.0832	1.00807	1.26672	0.982616	1.11543	0.994608	0.940957	0.824619	1.16683	1.2251	0.941087	0.882091	1.35454	1.11211	1.24324	0.937636	1.12983	0.932063	0.863878	0.7607	1.32685	1.13926	0.880137	0.783226	1.51792	1.06533	1.37335
Q15907	RAB11B	Ras-related protein Rab-11B OS=Homo sapiens OX=9606 GN=RAB11B PE=1 SV=4	NA	NA	NA	NA	NA	NA	NA	NA	NA	NA	NA	NA	NA	NA	NA	NA	1.12062	0.869164	0.852103	0.748825	1.10428	0.918786	1.26409	0.954621	1.15325	0.747373	0.830297	0.883438	1.14306	1.07811	0.840896	1.72632	0.60634	1.0823	NA	NA	NA	NA	NA	NA	NA	NA	NA	NA	1.21176	1.92586	1.30242
Q15942	ZYX	Zyxin OS=Homo sapiens OX=9606 GN=ZYX PE=1 SV=1	NA	NA	NA	NA	NA	NA	NA	NA	1.22035	0.803071	1.0247	0.915163	0.859637	0.810284	0.95211	0.658338	1.27447	0.929998	0.91548	0.96674	1.00591	1.15053	0.90532	1.13674	1.11651	0.968685	0.896391	1.0357	1.02413	0.882153	1.04333	1.14021	0.826278	0.795261	1.07602	1.41451	1.2647	1.90686	1.07639	0.807929	1.96823	1.48021	2.31948	1.45973	1.15501	1.17389	1.48195
Q16270	IGFBP7	Insulin-like growth factor-binding protein 7 OS=Homo sapiens OX=9606 GN=IGFBP7 PE=1 SV=1	0.823249	0.865017	1.11798	1.13375	1.08192	0.924215	1.07415	1.17642	0.738925	0.776953	0.7924	1.01171	0.84998	1.04059	0.852339	0.893228	0.846804	0.840955	0.967947	1.05541	0.916051	1.03512	1.09596	1.11636	0.895087	0.985276	0.979964	0.952638	0.905885	0.91694	0.97124	0.911364	1.17919	1.13792	NA	NA	NA	NA	NA	NA	NA	NA	NA	NA	NA	NA	NA
Q16394	EXT1	Exostosin-1 OS=Homo sapiens OX=9606 GN=EXT1 PE=1 SV=2	0.835088	0.903753	1.09916	1.20564	1.1778	1.20581	1.26112	1.48113	NA	NA	NA	NA	NA	NA	NA	NA	1.0442	1.00758	0.897199	1.17952	1.11072	1.46064	1.26234	1.65669	0.70125	1.32418	0.765726	1.12959	0.918722	1.33765	0.589842	1.24272	1.95369	1.65875	NA	NA	NA	NA	NA	NA	NA	NA	NA	NA	NA	NA	NA
Q16539	MAPK14	Mitogen-activated protein kinase 14 OS=Homo sapiens OX=9606 GN=MAPK14 PE=1 SV=3	NA	NA	NA	NA	NA	NA	NA	NA	NA	NA	NA	NA	NA	NA	NA	NA	NA	NA	NA	NA	NA	NA	NA	NA	NA	NA	NA	NA	NA	NA	NA	NA	NA	NA	NA	NA	NA	NA	NA	NA	NA	NA	NA	NA	1.09331	1.85164	1.21926
Q16610	ECM1	Extracellular matrix protein 1 OS=Homo sapiens OX=9606 GN=ECM1 PE=1 SV=2	0.772443	0.982548	0.9531	0.950593	1.05292	1.07453	1.02868	1.0057	0.903127	0.917004	0.953232	0.944944	1.17609	1.25954	1.16886	1.03025	0.911428	1.05577	0.800681	0.787199	0.943831	1.0299	1.04275	1.15133	1.05746	1.20506	0.862144	1.01038	0.984184	1.12685	1.05651	1.12358	1.14862	1.26593	0.726231	0.75231	0.93504	0.759067	0.808769	0.805748	0.806362	0.826278	0.746855	0.778031	0.865557	0.793334	0.902688
Q16706	MAN2A1	Alpha-mannosidase 2 OS=Homo sapiens OX=9606 GN=MAN2A1 PE=1 SV=2	0.70023	1.24729	0.924663	0.714794	0.891249	0.871456	0.808041	0.826622	0.983979	1.01171	0.982276	1.11512	0.977657	1.13375	1.12857	1.1267	1.02705	1.09916	1.05834	1.1299	1.00814	0.864957	1.03684	0.845748	0.97306	0.896018	1.15213	0.868441	1.03677	0.854173	0.69742	0.533219	0.924343	0.7635	1.23422	0.893104	1.23945	0.915416	0.968752	0.86802	0.972722	0.835725	0.975761	0.874967	1.65038	0.900938	1.35116
Q16787	LAMA3	Laminin subunit alpha-3 OS=Homo sapiens OX=9606 GN=LAMA3 PE=1 SV=2	1.05249	0.985823	0.964999	0.761333	1.02811	1.186	0.834856	0.925433	1.35764	1.43247	1.10435	0.840256	1.15013	1.03097	0.872786	0.895708	1.15741	1.11188	0.92287	0.787472	0.778139	0.670263	1.02833	0.716829	1.00083	0.86802	0.794049	0.757176	0.916877	1.03018	0.6685	0.66044	0.693035	0.735552	1.21521	0.907834	1.64855	1.23046	1.34733	1.51561	0.859816	0.708824	1.14219	0.932257	1.78188	0.854528	0.969021
Q16822	PCK2	Phosphoenolpyruvate carboxykinase [GTP], mitochondrial OS=Homo sapiens OX=9606 GN=PCK2 PE=1 SV=4	NA	NA	NA	NA	NA	NA	NA	NA	NA	NA	NA	NA	NA	NA	NA	NA	2.57362	1.02819	1.65623	1.59107	0.946123	1.20698	1.01227	0.898195	NA	NA	NA	NA	NA	NA	NA	NA	NA	NA	NA	NA	NA	NA	NA	NA	NA	NA	NA	NA	NA	NA	NA
Q16851	UGP2	UTP--glucose-1-phosphate uridylyltransferase OS=Homo sapiens OX=9606 GN=UGP2 PE=1 SV=5	2.39612	0.800293	0.886197	0.737186	1.31339	1.11667	0.795371	0.87037	0.968148	1.06688	0.795867	0.65293	1.33821	1.07654	0.995712	1.16829	1.64126	0.996955	2.25496	1.67261	0.878248	0.839441	0.999584	1.0108	0.872242	0.645415	0.882703	0.615103	1.03742	0.914338	1.01663	0.856663	0.654244	0.691547	0.549808	0.549694	0.682405	0.600735	0.625811	0.562373	0.636133	0.692603	0.641313	0.599986	1.02406	0.646176	0.707842
Q16853	AOC3	Membrane primary amine oxidase OS=Homo sapiens OX=9606 GN=AOC3 PE=1 SV=3	0.778517	1.09863	1.30894	1.04732	0.948158	1.49973	1.78077	1.10957	1.23979	0.821994	1.5389	1.58271	4.90856	8.10156	28.18	1.32777	0.786981	1.02456	0.978809	1.0471	2.1202	4.44351	1.0626	1.06644	NA	NA	NA	NA	NA	NA	NA	NA	NA	NA	1.24764	0.997854	0.982003	0.88589	1.28458	1.70858	3.22165	1.24384	1.06408	1.04863	NA	NA	NA
Q1ZYL8	IZUMO4	Izumo sperm-egg fusion protein 4 OS=Homo sapiens OX=9606 GN=IZUMO4 PE=2 SV=2	NA	NA	NA	NA	NA	NA	NA	NA	NA	NA	NA	NA	NA	NA	NA	NA	NA	NA	NA	NA	NA	NA	NA	NA	1.05929	1.24781	0.676565	0.720115	0.790754	0.975017	0.667991	1.04377	0.980099	1.52944	NA	NA	NA	NA	NA	NA	NA	NA	NA	NA	NA	NA	NA
Q3LXA3	TKFC	Triokinase/FMN cyclase OS=Homo sapiens OX=9606 GN=TKFC PE=1 SV=2	0.778193	0.487306	0.559884	0.744219	0.714844	0.65189	NA	0.602653	1.26357	0.55702	0.432928	0.942981	0.850038	0.64345	0.526754	1.10573	NA	NA	NA	NA	NA	NA	NA	NA	1.03965	1.16256	NA	NA	NA	NA	1.07654	1.16643	NA	NA	0.600152	1.42791	2.25152	1.91096	0.689059	1.12904	0.537375	1.17292	0.815807	0.81079	NA	NA	2.05523
Q3ZCW2	LGALSL	Galectin-related protein OS=Homo sapiens OX=9606 GN=LGALSL PE=1 SV=2	NA	NA	NA	NA	NA	NA	NA	NA	1.9526	1.14361	1.42385	0.921656	1.20598	1.19947	1.08756	0.736879	1.24617	0.679431	0.933162	0.896453	0.887058	0.998476	0.926845	0.984935	NA	NA	NA	NA	NA	NA	NA	NA	NA	NA	0.577143	1.39494	0.796861	1.71024	1.31148	1.19201	1.1267	1.65359	1.24643	1.52457	1.31951	0.949605	0.962528
Q53EU6	GPAT3	Glycerol-3-phosphate acyltransferase 3 OS=Homo sapiens OX=9606 GN=GPAT3 PE=1 SV=2	1.04558	1.31786	0.921975	0.646983	1.16433	1.32335	1.01234	1.39997	1.25536	1.60525	1.14854	0.80653	1.52351	1.25675	1.25414	0.971442	0.842647	0.948816	1.24074	0.960129	0.953365	0.733211	0.823477	0.595552	1.00598	0.935818	1.05074	1.44123	1.06231	1.59859	0.861307	0.790973	0.84078	0.866217	1.20798	0.80452	0.882214	0.662228	0.841421	0.811183	1.12998	0.866938	0.902188	0.867719	NA	NA	NA
Q5M9N0	CCDC158	Coiled-coil domain-containing protein 158 OS=Homo sapiens OX=9606 GN=CCDC158 PE=2 SV=2	1.27615	1.24998	1.66948	1.33367	1.58623	1.42672	1.04529	1.26558	1.2612	1.1704	1.18271	1.23097	1.05643	1.2812	1.06844	0.758962	0.680044	1.21723	1.08885	1.20214	1.6007	1.76773	1.84306	2.04812	1.4282	1.18337	1.73087	1.88858	1.28672	1.62744	1.3144	1.55887	1.25154	1.3262	0.397217	0.279496	0.376781	0.241886	0.341439	0.272268	0.510082	0.459871	0.31999	0.294166	NA	NA	NA
Q5T4S7	UBR4	E3 ubiquitin-protein ligase UBR4 OS=Homo sapiens OX=9606 GN=UBR4 PE=1 SV=1	0.902	0.943177	0.801459	0.504386	0.82955	0.681601	0.49727	0.755603	0.573752	1.30903	0.557367	0.589842	0.911744	0.826851	4.28917	1.07646	1.1704	1.21192	1.16538	0.918467	1.22239	1.34108	1.03147	1.12646	NA	NA	NA	NA	NA	NA	NA	NA	NA	NA	NA	NA	NA	NA	NA	NA	NA	NA	NA	NA	NA	NA	NA
Q5TBA9	FRY	Protein furry homolog OS=Homo sapiens OX=9606 GN=FRY PE=1 SV=1	0.749032	0.450969	0.647252	0.793004	0.726281	0.474737	0.672963	0.528985	NA	NA	NA	NA	NA	NA	NA	NA	NA	NA	NA	NA	NA	NA	NA	NA	NA	NA	NA	NA	NA	NA	NA	NA	NA	NA	NA	NA	NA	NA	NA	NA	NA	NA	NA	NA	NA	NA	NA
Q5VWQ8	DAB2IP	Disabled homolog 2-interacting protein OS=Homo sapiens OX=9606 GN=DAB2IP PE=1 SV=2	0.822735	1.10443	1.16999	0.920634	0.795095	0.732601	0.773943	1.00835	0.755341	0.954886	0.774426	0.667713	1.11381	1.04297	0.818242	0.848979	NA	NA	NA	NA	NA	NA	NA	NA	0.484679	0.431102	0.655833	0.6685	0.628028	0.857079	0.627027	0.568448	0.487205	0.313296	NA	NA	NA	NA	NA	NA	NA	NA	NA	NA	1.32317	0.738823	0.91834
Q5VXH5	PRAMEF7	PRAME family member 7 OS=Homo sapiens OX=9606 GN=PRAMEF7 PE=2 SV=2	1.23413	1.68319	0.98808	1.0334	1.11334	1.3017	0.766894	1.64524	1.33848	1.66521	1.37783	1.2598	1.65244	2.30298	3.39286	2.49009	1.48093	1.51446	1.85897	1.71523	1.75808	1.02819	1.24281	0.987327	1.16643	1.10888	1.02108	1.804	1.21833	1.46439	1.05533	0.667435	1.40756	1.24686	1.17609	0.670449	0.894653	0.55938	0.674318	0.730927	0.826508	0.403768	0.730725	0.602611	1.1207	0.461403	0.54348
Q5W0V3	FAM160B1	Protein FAM160B1 OS=Homo sapiens OX=9606 GN=FAM160B1 PE=1 SV=1	0.607392	0.55417	0.845572	0.871335	0.857733	0.835667	0.94442	1.12358	1.11713	0.963796	0.754399	1.25458	0.731586	1.39474	0.782683	0.838103	1.33839	1.48957	0.996609	1.01875	1.2126	1.61642	1.17048	2.118	1.17936	2.18859	1.13634	1.24212	1.22774	0.970433	1.84242	1.91189	1.9928	2.09173	NA	NA	NA	NA	NA	NA	NA	NA	NA	NA	NA	NA	NA
Q6EEV6	SUMO4	Small ubiquitin-related modifier 4 OS=Homo sapiens OX=9606 GN=SUMO4 PE=1 SV=2	NA	NA	NA	NA	NA	NA	NA	NA	1.2485	1.06918	0.884602	1.39736	1.09255	1.44553	0.939718	0.965669	NA	NA	NA	NA	NA	NA	NA	NA	1.16038	0.72618	0.897075	0.905132	1.12272	1.05416	0.820514	1.16054	0.672171	1.18173	1.0949	1.4147	1.02918	1.804	1.26225	0.989519	1.17129	1.62631	1.19814	1.58491	1.17259	1.38501	1.21453
Q6EMK4	VASN	Vasorin OS=Homo sapiens OX=9606 GN=VASN PE=1 SV=1	0.912945	0.924279	1.02144	1.05533	1.00417	1.07497	1.15845	1.07721	0.79207	0.847274	0.890323	1.09202	0.931934	1.17064	1.1429	1.02264	0.873573	0.946779	0.833469	0.880747	1.01635	1.0805	1.26313	1.27925	1.03692	1.20064	1.18575	1.24548	1.08628	1.1068	1.34397	1.1242	1.21639	0.996678	1.35257	1.27191	1.61933	1.16457	0.991717	1.30812	1.21799	1.17097	1.21428	0.935364	1.25492	0.97976	1.15157
Q6P179	ERAP2	Endoplasmic reticulum aminopeptidase 2 OS=Homo sapiens OX=9606 GN=ERAP2 PE=1 SV=2	0.966673	1.10236	0.99	0.78453	1.18748	0.921464	1.0122	0.973734	0.956078	0.888596	0.805245	1.0835	0.94285	1.08568	1.00083	0.960129	NA	NA	NA	NA	NA	NA	NA	NA	0.895459	0.963262	0.702222	0.971509	0.763341	0.676096	0.622135	0.751893	1.21377	1.05183	NA	NA	NA	NA	NA	NA	NA	NA	NA	NA	NA	NA	NA
Q6PL18	ATAD2	ATPase family AAA domain-containing protein 2 OS=Homo sapiens OX=9606 GN=ATAD2 PE=1 SV=1	1.02271	1.28183	0.902501	0.64038	0.928967	0.903127	0.780949	1.11922	1.33682	1.89684	1.51719	1.03047	1.48586	1.31321	1.38204	1.48144	0.821311	0.916051	1.30831	1.26392	0.961261	0.556942	0.780732	0.566128	NA	NA	NA	NA	NA	NA	NA	NA	NA	NA	NA	NA	NA	NA	NA	NA	NA	NA	NA	NA	NA	NA	NA
Q6Q788	APOA5	Apolipoprotein A-V OS=Homo sapiens OX=9606 GN=APOA5 PE=1 SV=1	1.64752	0.95767	1.21706	1.06349	2.1492	1.38645	1.31003	1.26427	1.28396	1.52869	0.87612	1.19177	1.10198	1.35557	1.14053	3.57192	1.38032	1.33635	1.43038	2.08638	1.31558	1.41108	1.59704	1.38521	NA	NA	NA	NA	NA	NA	NA	NA	NA	NA	1.02413	0.989382	1.64046	1.12889	1.01734	1.59815	1.15894	1.58964	1.86891	1.71665	NA	NA	NA
Q6UX71	PLXDC2	Plexin domain-containing protein 2 OS=Homo sapiens OX=9606 GN=PLXDC2 PE=1 SV=1	0.904567	0.902376	1.18181	1.15757	0.998822	1.05023	1.1657	1.14798	0.944289	0.965869	0.882887	1.12607	0.949013	0.996955	0.797745	1.13697	0.919996	1.02819	1.03649	1.00014	0.976776	1.19061	1.03756	1.2972	0.999861	1.07706	1.1242	1.24669	1.04739	1.13257	1.08779	1.51204	1.16199	1.13674	1.21773	0.989451	1.03749	0.927359	1.21251	1.16862	1.3045	1.09066	1.16304	1.09126	1.21403	1.17764	1.25136
Q6UXB8	PI16	Peptidase inhibitor 16 OS=Homo sapiens OX=9606 GN=PI16 PE=1 SV=1	0.647521	0.674505	0.634503	0.918149	0.732855	0.681365	0.94632	1.20481	0.981663	0.824562	0.838975	1.00982	0.749396	0.860412	0.854943	0.803294	0.577103	0.60257	0.536779	0.558063	0.736879	1.32915	0.696937	1.06821	1.10558	2.04372	0.90645	1.0811	0.858327	0.911364	0.835899	1.5015	1.67133	2.674	1.15829	1.09323	1.24591	1.10811	1.01333	2.20167	0.920634	1.15173	0.672917	1.25536	0.64986	1.48803	0.628986
Q6UXH0	ANGPTL8	Angiopoietin-like protein 8 OS=Homo sapiens OX=9606 GN=ANGPTL8 PE=1 SV=1	NA	0.746389	NA	1.57538	0.85928	NA	1.86245	1.79651	0.684442	0.991442	1.44904	1.64718	0.503234	0.363392	0.416388	1.59383	0.974545	0.887981	1.26663	1.30423	0.82955	1.09581	1.10328	1.10558	0.467844	0.846921	0.710201	0.534033	0.542765	0.823306	0.84329	1.09285	1.10957	0.477807	1.47376	1.67842	1.55725	1.21201	0.946911	0.983979	0.801181	1.05168	0.878065	1.0487	1.04892	1.186	NA
Q6UY14	ADAMTSL4	ADAMTS-like protein 4 OS=Homo sapiens OX=9606 GN=ADAMTSL4 PE=1 SV=2	NA	NA	NA	NA	NA	NA	NA	NA	1.73123	1.36009	1.08538	1.12187	0.829435	0.844576	0.936727	1.15077	1.038	0.876363	0.823192	0.734126	1.1974	1.70137	1.77018	1.59538	1.09263	1.27385	1.38992	0.770144	1.34593	1.0808	1.63297	0.771426	2.15442	1.40795	NA	NA	NA	NA	NA	NA	NA	NA	NA	NA	NA	NA	NA
Q6YHK3	CD109	CD109 antigen OS=Homo sapiens OX=9606 GN=CD109 PE=1 SV=2	0.819718	0.789494	0.881297	0.830758	0.775608	0.683873	0.750331	0.710349	1.16999	1.0367	0.963596	1.09157	0.754713	0.907582	0.816543	0.83822	0.932451	0.910354	0.838568	0.877457	0.857614	1.00257	0.949079	1.04826	0.981527	1.00424	1.03987	1.04037	0.964531	1.18534	0.966539	0.964933	1.42701	1.32583	0.885522	0.94063	0.826107	0.765991	1.4838	1.15926	1.03828	0.789275	1.26681	1.09293	1.22544	1.26488	1.0829
Q70J99	UNC13D	Protein unc-13 homolog D OS=Homo sapiens OX=9606 GN=UNC13D PE=1 SV=1	NA	NA	NA	NA	NA	NA	NA	NA	0.999376	0.832949	0.867479	1.28432	1.08065	1.32758	1.25128	1.3744	NA	NA	NA	NA	NA	NA	NA	NA	NA	NA	NA	NA	NA	NA	NA	NA	NA	NA	NA	NA	NA	NA	NA	NA	NA	NA	NA	NA	NA	NA	NA
Q71DI3	HIST2H3A	Histone H3.2 OS=Homo sapiens OX=9606 GN=HIST2H3A PE=1 SV=3	0.85299	0.856604	4.36385	3.15995	1.97301	1.31832	1.1433	2.35561	0.495206	0.607013	0.596875	0.989519	1.18995	0.795426	0.664067	4.25129	1.51194	1.04283	2.65571	1.33274	0.793554	1.12701	1.24755	1.01762	NA	NA	NA	NA	NA	NA	NA	NA	NA	NA	NA	NA	NA	NA	NA	NA	NA	NA	NA	NA	NA	NA	NA
Q76LX8	ADAMTS13	A disintegrin and metalloproteinase with thrombospondin motifs 13 OS=Homo sapiens OX=9606 GN=ADAMTS13 PE=1 SV=1	0.923894	1.03893	1.17007	0.931611	1.07162	1.10183	1.14322	0.974004	0.744477	0.805859	0.615018	0.830528	0.955217	1.2422	1.23251	0.960329	0.732601	0.938611	0.792509	0.956873	0.957471	0.996471	1.15845	1.24781	1.23499	1.45438	0.954886	0.950725	1.08058	1.31021	1.30215	1.01755	1.43366	1.05555	0.844108	0.853226	1.03448	1.12849	1.11103	1.3251	2.24187	1.58129	1.19906	1.13989	NA	NA	NA
Q7KZF4	SND1	Staphylococcal nuclease domain-containing protein 1 OS=Homo sapiens OX=9606 GN=SND1 PE=1 SV=1	NA	NA	NA	NA	NA	NA	NA	NA	1.11242	0.691739	0.919168	0.712618	0.938416	1.15773	0.747321	0.991236	1.04993	0.883009	1.24212	1.24677	0.975694	0.790151	0.957802	0.808657	0.767001	0.604285	1.00278	0.627723	0.865317	0.807873	1.21563	0.687485	0.426495	0.297755	0.95482	1.16999	0.894777	1.13784	0.928324	0.841479	0.909408	1.1974	1.33876	1.40717	NA	NA	NA
Q7L1W4	LRRC8D	Volume-regulated anion channel subunit LRRC8D OS=Homo sapiens OX=9606 GN=LRRC8D PE=1 SV=1	NA	NA	NA	NA	NA	NA	NA	NA	NA	NA	NA	NA	NA	NA	NA	NA	NA	NA	NA	NA	NA	NA	NA	NA	NA	NA	NA	NA	NA	NA	NA	NA	NA	NA	NA	NA	NA	NA	NA	NA	NA	NA	NA	NA	NA	NA	NA
Q7L2K0	TEDC2	Tubulin epsilon and delta complex protein 2 OS=Homo sapiens OX=9606 GN=TEDC2 PE=1 SV=1	NA	NA	NA	NA	NA	NA	NA	NA	1.0009	1.24998	1.02697	0.834509	1.10405	0.92006	0.786163	0.632045	1.16772	1.2886	1.31221	1.20155	0.917703	0.804576	0.832026	0.779489	1.65783	1.4872	0.951648	1.09331	1.07214	1.34509	0.99654	1.15902	1.78448	1.91959	NA	NA	NA	NA	NA	NA	NA	NA	NA	NA	NA	NA	NA
Q7LDG7	RASGRP2	RAS guanyl-releasing protein 2 OS=Homo sapiens OX=9606 GN=RASGRP2 PE=1 SV=1	NA	NA	NA	NA	NA	NA	NA	NA	NA	NA	NA	NA	NA	NA	NA	NA	NA	NA	NA	NA	NA	NA	NA	NA	NA	NA	NA	NA	NA	NA	NA	NA	NA	NA	0.839964	1.15597	0.874421	1.19317	0.785836	0.892238	1.26251	1.62642	1.04485	1.23816	0.780029	1.26927	0.885154
Q7Z4W1	DCXR	L-xylulose reductase OS=Homo sapiens OX=9606 GN=DCXR PE=1 SV=2	NA	NA	NA	NA	NA	NA	NA	NA	NA	NA	NA	NA	NA	NA	NA	NA	2.61571	1.37669	4.93004	2.42368	1.04558	1.167	2.91865	1.01988	NA	NA	NA	NA	NA	NA	NA	NA	NA	NA	NA	NA	NA	NA	NA	NA	NA	NA	NA	NA	NA	NA	NA
Q7Z6G3	NECAB2	N-terminal EF-hand calcium-binding protein 2 OS=Homo sapiens OX=9606 GN=NECAB2 PE=1 SV=1	1.09194	1.24582	0.831968	0.544008	0.969088	0.840256	0.573911	1.15469	NA	NA	NA	NA	NA	NA	NA	NA	0.868923	0.956873	1.17838	1.21226	1.88544	2.08204	0.829435	0.670682	NA	NA	NA	NA	NA	NA	NA	NA	NA	NA	NA	NA	NA	NA	NA	NA	NA	NA	NA	NA	NA	NA	NA
Q7Z7G0	ABI3BP	Target of Nesh-SH3 OS=Homo sapiens OX=9606 GN=ABI3BP PE=1 SV=1	0.794434	0.779435	0.863998	0.802126	0.961994	1.1055	0.973464	0.939197	0.851631	0.945664	0.894343	1.50222	0.905446	1.11659	1.08065	1.15381	0.998338	1.12865	1.00982	1.03699	1.01108	1.01487	1.30252	1.13619	1.1108	1.19358	1.07319	1.04398	1.10236	1.06172	1.21352	1.22129	1.18509	1.09977	1.0057	0.985344	0.992817	0.890137	1.05526	1.29729	1.15477	1.03233	0.737492	0.813323	1.06659	0.885522	1.14227
Q7Z7M0	MEGF8	Multiple epidermal growth factor-like domains protein 8 OS=Homo sapiens OX=9606 GN=MEGF8 PE=1 SV=2	NA	NA	NA	NA	NA	NA	NA	NA	1.09361	1.29783	1.3297	1.26453	1.12311	1.20289	1.14361	1.10588	0.719267	1.04892	1.27766	1.54778	0.864837	0.788127	0.923382	0.962661	1.10282	1.23902	1.12889	1.07609	0.917449	1.12412	1.20899	1.32061	1.26655	1.28058	1.30423	1.13895	1.18665	1.1916	1.17487	1.09992	1.19053	1.12475	1.1823	1.08824	0.895708	0.800348	0.81321
Q86U17	SERPINA11	Serpin A11 OS=Homo sapiens OX=9606 GN=SERPINA11 PE=2 SV=2	0.545783	0.891558	0.905697	0.738362	0.952572	1.18715	1.24298	1.00049	0.627201	0.918403	0.964063	1.21571	1.3133	1.42129	1.63989	0.990686	0.934457	1.29468	0.929225	0.947764	0.809723	0.909093	1.52003	1.16127	0.573434	0.712173	0.755812	0.867298	0.721064	0.78122	1.5042	1.20255	0.976302	0.938221	1.27828	0.933227	0.99585	0.685629	1.07617	0.881358	2.03566	1.32006	0.748773	0.496856	0.774963	0.876363	1.00459
Q86UD1	OAF	Out at first protein homolog OS=Homo sapiens OX=9606 GN=OAF PE=2 SV=1	1.02576	1.06496	1.1691	1.00173	1.186	1.22383	1.41922	1.13179	1.06032	1.0416	1.18608	1.59926	1.24911	1.43117	1.00278	1.06644	0.926139	1.0403	0.892794	1.09376	1.03706	0.993299	1.21478	1.13249	0.999515	1.16215	1.29191	1.03857	1.06231	1.13281	1.2174	1.25553	1.272	1.22654	NA	NA	NA	NA	NA	NA	NA	NA	NA	NA	NA	NA	NA
Q86UN3	RTN4RL2	Reticulon-4 receptor-like 2 OS=Homo sapiens OX=9606 GN=RTN4RL2 PE=1 SV=1	0.97847	1.49806	1.51687	1.18575	1.18099	1.04485	1.09187	1.50577	2.31723	1.33617	3.05739	3.98782	1.47509	1.51162	1.74751	1.48772	1.25292	1.05227	0.989588	0.809162	0.685629	0.922487	0.829722	1.23696	NA	NA	NA	NA	NA	NA	NA	NA	NA	NA	2.45105	1.56743	1.64581	1.19077	1.18476	1.17854	2.01377	1.52024	2.65516	1.52637	NA	NA	NA
Q86UX7	FERMT3	Fermitin family homolog 3 OS=Homo sapiens OX=9606 GN=FERMT3 PE=1 SV=1	0.922934	0.590455	0.739796	0.706813	0.842822	0.757438	0.813379	0.751372	1.64832	1.05227	1.0184	1.0279	0.8337	0.721614	0.624901	0.553134	1.02769	0.584186	0.60735	0.824734	0.942589	1.64718	0.956674	1.64433	0.978742	1.18748	1.77645	1.49661	1.58227	0.991717	2.3715	0.729712	2.56259	0.786272	0.586661	1.17089	0.798741	1.46307	0.721564	0.842647	0.858089	1.20272	0.978199	1.04073	1.15789	1.70645	1.26997
Q86VB7	CD163	Scavenger receptor cysteine-rich type 1 protein M130 OS=Homo sapiens OX=9606 GN=CD163 PE=1 SV=2	1.39329	1.37411	1.47765	1.49154	1.1708	1.01762	1.08945	1.20849	0.882703	1.04826	1.02541	1.21875	1.02712	1.08245	1.11985	1.67656	1.33607	1.37449	1.35247	1.30306	1.07587	1.0398	1.21394	1.05629	1.00716	0.878187	1.27235	1.30568	1.07252	1.14591	1.5421	1.39214	0.932257	0.883009	NA	NA	NA	NA	NA	NA	NA	NA	NA	NA	0.337042	0.471752	0.315017
Q86WN1	FCHSD1	F-BAR and double SH3 domains protein 1 OS=Homo sapiens OX=9606 GN=FCHSD1 PE=1 SV=1	NA	NA	NA	NA	NA	NA	NA	NA	0.500763	0.565579	0.865077	0.789987	5.01796	4.65635	4.49431	5.03712	NA	NA	NA	NA	NA	NA	NA	NA	NA	NA	NA	NA	NA	NA	NA	NA	NA	NA	2.47032	1.84612	2.03934	1.53304	1.6895	1.67481	1.40085	1.12039	1.12975	1.21951	NA	NA	NA
Q86YW9	MED12L	Mediator of RNA polymerase II transcription subunit 12-like protein OS=Homo sapiens OX=9606 GN=MED12L PE=1 SV=2	NA	NA	NA	NA	NA	NA	NA	NA	NA	NA	NA	NA	NA	NA	NA	NA	NA	NA	NA	NA	NA	NA	NA	NA	NA	NA	NA	NA	NA	NA	NA	NA	NA	NA	1.8035	1.11466	2.4326	2.0638	0.729864	0.623085	0.559806	0.475692	1.02769	0.858506	NA	NA	NA
Q8IWL2	SFTPA1	Pulmonary surfactant-associated protein A1 OS=Homo sapiens OX=9606 GN=SFTPA1 PE=1 SV=2	1.08885	1.29801	1.48658	2.22499	1.36794	1.5552	1.57866	1.47672	0.896888	1.10696	1.13705	1.77756	1.01537	1.14544	1.25284	0.990412	0.810621	1.193	0.968283	1.06223	0.84364	0.890137	1.0304	0.963596	0.768597	1.21419	1.33145	1.05358	0.918658	0.54382	1.29513	1.08606	1.13037	0.870068	0.967746	0.713359	0.812421	0.859637	0.824962	0.980983	1.30053	1.23183	0.814	0.837871	NA	NA	NA
Q8IXL6	FAM20C	Extracellular serine/threonine protein kinase FAM20C OS=Homo sapiens OX=9606 GN=FAM20C PE=1 SV=2	NA	NA	NA	NA	NA	NA	NA	NA	NA	NA	NA	NA	NA	NA	NA	NA	0.842472	0.379744	0.760648	0.983843	1.03548	0.414057	0.781761	0.555285	NA	NA	NA	NA	NA	NA	NA	NA	NA	NA	NA	NA	NA	NA	NA	NA	NA	NA	NA	NA	NA	NA	NA
Q8IY33	MICALL2	MICAL-like protein 2 OS=Homo sapiens OX=9606 GN=MICALL2 PE=1 SV=1	1.01783	1.16934	0.714448	0.476682	0.969827	0.878613	0.858863	1.29316	1.04275	1.33062	0.947961	0.935105	1.42899	1.02193	0.79653	0.698242	0.875513	0.985618	1.49568	1.44503	1.01706	0.517561	1.51803	1.07512	0.772015	0.771854	0.706274	0.798741	1.25919	1.45377	0.619854	0.784693	0.925818	0.756651	NA	NA	NA	NA	NA	NA	NA	NA	NA	NA	NA	NA	NA
Q8IZF2	ADGRF5	Adhesion G protein-coupled receptor F5 OS=Homo sapiens OX=9606 GN=ADGRF5 PE=1 SV=3	1.02392	0.938156	1.0787	1.09946	0.932516	0.807985	0.895894	0.914972	1.11744	1.1016	0.958334	1.21184	0.919295	1.09779	0.877153	1.03598	0.683778	0.843757	0.814733	0.860174	0.72412	0.609247	0.726281	0.762707	0.835493	0.84405	1.50285	0.888165	0.993299	0.958732	1.03771	1.18995	0.843348	0.651664	1.29873	0.71668	NA	NA	0.894219	1.01607	NA	NA	NA	NA	1.44944	0.660944	0.825992
Q8N149	LILRA2	Leukocyte immunoglobulin-like receptor subfamily A member 2 OS=Homo sapiens OX=9606 GN=LILRA2 PE=1 SV=2	NA	NA	NA	NA	NA	NA	NA	NA	0.404861	0.642069	0.312776	0.538083	0.734279	0.697082	0.618824	0.613187	2.88406	2.62752	1.68751	1.25128	1.16409	1.02356	0.278008	0.56554	0.516915	0.333048	0.406239	0.424195	0.512954	0.338447	0.589311	0.386302	0.617838	0.313535	0.243754	0.420128	0.531927	0.467423	0.205342	0.590251	0.481831	0.531632	0.555901	0.187453	2.03425	0.883376	1.08779
Q8N9R8	SCAI	Protein SCAI OS=Homo sapiens OX=9606 GN=SCAI PE=1 SV=2	0.661448	1.28744	0.789603	0.379402	1.48339	0.628289	2.58991	0.406239	0.708284	0.933033	0.73255	1.36349	0.816882	0.849744	6.5755	0.809218	0.802181	1.32712	0.77148	0.934716	0.937441	2.35316	2.00319	3.32211	0.894157	0.925625	0.546957	0.878126	0.998822	0.49948	6.51832	1.58436	4.72921	0.205171	0.646132	0.510966	0.76202	0.594274	1.19507	0.595305	6.33876	0.637634	6.85901	0.204348	NA	NA	NA
Q8NBJ4	GOLM1	Golgi membrane protein 1 OS=Homo sapiens OX=9606 GN=GOLM1 PE=1 SV=1	1.25527	1.84958	2.28881	1.19773	1.64456	2.67011	2.54153	1.48349	0.845748	0.737084	0.917068	1.51058	1.26866	1.35585	1.51614	1.11365	0.840081	1.05731	0.794489	0.656697	0.8791	0.845396	1.05256	0.816769	0.660394	0.635736	2.04542	2.08782	0.745872	0.725879	1.41402	0.963729	0.869345	0.625378	1.06548	0.656788	1.16022	0.570619	0.79935	0.589474	1.03713	0.739796	0.929805	0.653111	0.866337	0.700181	1.18987
Q8NBP7	PCSK9	Proprotein convertase subtilisin/kexin type 9 OS=Homo sapiens OX=9606 GN=PCSK9 PE=1 SV=3	0.75419	0.772603	0.891681	1.09794	0.934068	0.925304	0.951516	0.944813	1.10734	1.20197	1.28726	1.36103	1.1487	1.48895	1.21985	1.75066	0.857614	0.949605	0.9973	1.04304	0.928066	0.774534	1.10343	0.848449	0.917513	1.23379	1.05834	1.00069	1.0643	1.34751	1.31951	1.22019	1.26769	1.24626	1.41372	1.05285	1.03498	0.913008	1.2416	1.31458	1.25475	1.29783	1.21453	0.656652	NA	NA	NA
Q8NBS9	TXNDC5	Thioredoxin domain-containing protein 5 OS=Homo sapiens OX=9606 GN=TXNDC5 PE=1 SV=2	NA	NA	NA	NA	NA	NA	NA	NA	1.3196	1.11396	1.02669	1.38425	1.13367	0.994539	1.67865	1.44063	1.05446	0.78252	0.95145	0.87612	1.10604	1.0714	1.3345	1.13053	0.898817	0.814733	0.917576	0.943634	1.02059	0.988834	1.00104	1.03111	0.820457	1.05263	NA	NA	NA	NA	NA	NA	NA	NA	NA	NA	NA	NA	NA
Q8NFR7	CCDC148	Coiled-coil domain-containing protein 148 OS=Homo sapiens OX=9606 GN=CCDC148 PE=1 SV=2	1.3309	1.91534	1.28449	0.864477	1.64741	1.5153	1.25405	2.09987	NA	NA	NA	NA	NA	NA	NA	NA	0.594356	0.926074	1.45821	1.3686	1.1176	1.13084	1.00947	0.885768	0.628158	0.675862	1.13855	0.719816	0.795316	1.12912	2.51089	2.50273	0.872847	0.795923	NA	NA	NA	NA	NA	NA	NA	NA	NA	NA	NA	NA	NA
Q8NI99	ANGPTL6	Angiopoietin-related protein 6 OS=Homo sapiens OX=9606 GN=ANGPTL6 PE=1 SV=1	0.984798	0.827482	0.827941	1.15437	1.06157	1.05966	1.06496	0.986848	NA	NA	NA	NA	NA	NA	NA	NA	0.913198	0.975288	0.79196	1.20155	0.83671	0.91694	1.58249	1.74231	NA	NA	NA	NA	NA	NA	NA	NA	NA	NA	0.985208	1.38194	1.72369	1.61552	1.22833	1.67365	1.5619	1.53592	1.24298	1.12303	1.7825	1.61619	1.51016
Q8TBX8	PIP4K2C	Phosphatidylinositol 5-phosphate 4-kinase type-2 gamma OS=Homo sapiens OX=9606 GN=PIP4K2C PE=1 SV=3	NA	NA	NA	NA	NA	NA	NA	NA	NA	NA	NA	NA	NA	NA	NA	NA	NA	NA	NA	NA	NA	NA	NA	NA	NA	NA	NA	NA	NA	NA	NA	NA	NA	NA	NA	NA	NA	NA	NA	NA	NA	NA	NA	NA	NA	NA	NA
Q8TDL5	BPIFB1	BPI fold-containing family B member 1 OS=Homo sapiens OX=9606 GN=BPIFB1 PE=1 SV=1	0.743188	0.89298	1.26602	1.74521	1.19334	1.06947	1.57888	1.68319	NA	NA	NA	NA	NA	NA	NA	NA	0.71837	1.05797	1.09066	1.10903	0.886996	1.23739	1.30812	1.11644	1.2023	1.23645	0.832833	0.988286	1.0838	1.0674	0.94187	1.33201	1.55079	1.37907	NA	NA	NA	NA	NA	NA	NA	NA	NA	NA	NA	NA	NA
Q8TEP8	CEP192	Centrosomal protein of 192 kDa OS=Homo sapiens OX=9606 GN=CEP192 PE=1 SV=3	0.874421	1.03641	0.908211	1.18896	1.15021	1.30686	1.03104	1.20522	1.84792	1.71012	1.81919	1.77068	1.77301	1.81995	1.80438	1.80826	1.1003	1.34471	1.17723	1.1743	1.1743	1.01847	1.20673	1.13414	1.40075	1.44894	1.26155	1.30867	1.29612	1.44213	1.20547	1.28307	1.45407	1.50629	1.9833	1.3422	1.7486	1.31076	1.61272	2.01852	1.53762	1.60125	1.48494	1.58491	1.26549	1.20539	0.747528
Q8TER0	SNED1	Sushi, nidogen and EGF-like domain-containing protein 1 OS=Homo sapiens OX=9606 GN=SNED1 PE=2 SV=2	NA	NA	NA	NA	NA	NA	NA	NA	NA	NA	NA	NA	NA	NA	NA	NA	NA	NA	NA	NA	NA	NA	NA	NA	NA	NA	NA	NA	NA	NA	NA	NA	NA	NA	NA	NA	NA	NA	NA	NA	NA	NA	NA	NA	NA	NA	NA
Q8WU58	FAM222B	Protein FAM222B OS=Homo sapiens OX=9606 GN=FAM222B PE=2 SV=1	NA	NA	NA	NA	NA	NA	NA	NA	NA	NA	NA	NA	NA	NA	NA	NA	1.1599	1.21521	1.32482	1.13516	1.00919	0.474737	0.810509	0.548628	0.559302	0.529683	1.32979	0.870068	0.75231	1.12342	0.691835	0.631826	0.641135	0.633888	NA	NA	NA	NA	NA	NA	NA	NA	NA	NA	2.37808	0.55702	1.5356
Q8WUJ1	CYB5D2	Neuferricin OS=Homo sapiens OX=9606 GN=CYB5D2 PE=2 SV=1	1.0071	1.12436	1.10366	0.957603	0.989108	1.12865	0.971577	0.706911	1.70432	1.21504	1.4205	1.56743	1.13824	1.46703	1.21622	0.937896	0.842121	1.06128	0.82932	0.774963	0.761703	0.641757	0.788018	0.699211	1.10535	1.08343	0.623863	0.689059	0.991923	0.840838	1.02399	1.11535	0.767533	0.885522	NA	NA	NA	NA	NA	NA	NA	NA	NA	NA	NA	NA	NA
Q8WWA0	ITLN1	Intelectin-1 OS=Homo sapiens OX=9606 GN=ITLN1 PE=1 SV=1	NA	NA	NA	NA	NA	NA	NA	NA	NA	NA	NA	NA	NA	NA	NA	NA	NA	NA	NA	NA	NA	NA	NA	NA	NA	NA	NA	NA	NA	NA	NA	NA	NA	NA	0.673663	1.02413	0.899316	0.810734	0.918467	1.36264	1.1687	1.17381	0.998892	1.06851	NA	NA	NA
Q8WWZ8	OIT3	Oncoprotein-induced transcript 3 protein OS=Homo sapiens OX=9606 GN=OIT3 PE=1 SV=2	0.945795	1.34183	1.42178	0.980439	1.16675	1.29352	1.11226	1.47601	0.933486	0.922679	0.949276	1.1292	1.383	1.43048	1.42642	0.939979	0.920188	1.17911	1.05468	1.14758	1.34471	1.27996	1.15101	1.21352	1.04102	0.961927	1.05212	1.14774	0.80296	0.9652	1.02826	1.1128	0.830355	0.720565	0.97847	0.580191	1.2285	0.831622	0.786981	0.736113	1.31731	1.14591	0.95767	0.788673	NA	NA	NA
Q8WZ42	TTN	Titin OS=Homo sapiens OX=9606 GN=TTN PE=1 SV=4	0.872605	1.02612	0.698097	0.64296	1.00139	0.919168	0.724823	1.11057	1.16441	1.07118	1.11497	1.25006	1.93361	1.82868	2.30665	1.46013	NA	NA	NA	NA	NA	NA	NA	NA	NA	NA	NA	NA	NA	NA	NA	NA	NA	NA	0.58719	0.53333	0.619296	0.526717	0.883621	0.545821	0.852871	0.524567	0.717475	0.639892	1.70291	0.425019	0.873331
Q92547	TOPBP1	DNA topoisomerase 2-binding protein 1 OS=Homo sapiens OX=9606 GN=TOPBP1 PE=1 SV=3	0.687533	0.688105	0.46019	0.403041	0.742056	0.53108	1.35454	0.797801	1.43356	1.59926	1.16926	1.01368	1.06238	1.03922	1.50202	0.831392	NA	NA	NA	NA	NA	NA	NA	NA	1.26077	1.11589	0.711236	0.505786	1.27421	1.48011	0.62964	0.461531	0.563036	0.558721	NA	NA	NA	NA	NA	NA	NA	NA	NA	NA	1.16748	0.927938	1.24281
Q92674	CENPI	Centromere protein I OS=Homo sapiens OX=9606 GN=CENPI PE=1 SV=2	NA	NA	NA	NA	NA	NA	NA	NA	1.10957	1.04913	1.56255	1.6007	1.34518	1.23525	1.3551	1.68518	NA	NA	NA	NA	NA	NA	NA	NA	NA	NA	NA	NA	NA	NA	NA	NA	NA	NA	NA	NA	NA	NA	NA	NA	NA	NA	NA	NA	NA	NA	NA
Q92736	RYR2	Ryanodine receptor 2 OS=Homo sapiens OX=9606 GN=RYR2 PE=1 SV=3	0.887365	1.17251	0.892485	0.81898	1.02811	1.09247	1.01073	1.30803	1.09172	1.36708	1.07378	0.82542	1.45105	1.35472	1.22374	1.23004	0.918022	1.16959	1.38934	1.2937	1.17723	1.14449	0.772122	0.636442	0.980031	0.923959	1.03742	1.45811	1.0847	1.45407	0.930837	0.830873	0.875209	0.834278	0.779057	0.674598	0.773032	0.654198	0.6504	0.654334	1.17446	1.08681	0.924023	0.850982	1.38175	0.653066	1.11072
Q92743	HTRA1	Serine protease HTRA1 OS=Homo sapiens OX=9606 GN=HTRA1 PE=1 SV=1	0.951582	1.40075	3.56499	1.22629	1.91229	2.63774	2.25621	3.3559	NA	NA	NA	NA	NA	NA	NA	NA	1.08058	1.52922	1.05205	1.03383	1.35266	0.865317	1.78547	1.03843	NA	NA	NA	NA	NA	NA	NA	NA	NA	NA	NA	NA	NA	NA	NA	NA	NA	NA	NA	NA	NA	NA	NA
Q92786	PROX1	Prospero homeobox protein 1 OS=Homo sapiens OX=9606 GN=PROX1 PE=1 SV=2	0.949869	1.12521	0.688582	0.505051	1.30803	1.13296	0.811127	1.08998	NA	NA	NA	NA	NA	NA	NA	NA	NA	NA	NA	NA	NA	NA	NA	NA	0.754399	0.901126	1.10045	1.32024	1.52267	1.97042	0.662136	0.612508	0.79493	0.874724	1.17854	0.726835	0.986917	0.739591	0.857079	0.721164	3.22769	0.929354	3.34359	0.563622	1.7554	NA	1.91004
Q92820	GGH	Gamma-glutamyl hydrolase OS=Homo sapiens OX=9606 GN=GGH PE=1 SV=2	0.672544	0.898817	1.02222	0.802181	0.89199	0.831968	0.774373	1.05292	0.908274	0.774695	1.07304	1.08832	0.786544	1.06437	1.01833	0.607813	0.916242	0.892176	0.727339	0.645505	0.863998	0.940826	0.945009	0.969827	1.03915	1.1343	0.828802	1.23379	0.66591	0.732652	0.929354	1.13406	0.934327	0.991167	1.04239	0.755865	1.35285	0.676752	0.795481	0.691116	1.64855	1.25067	0.87527	0.767852	1.30523	0.941217	1.35764
Q92823	NRCAM	Neuronal cell adhesion molecule OS=Homo sapiens OX=9606 GN=NRCAM PE=1 SV=3	NA	NA	NA	NA	NA	NA	NA	NA	NA	NA	NA	NA	NA	NA	NA	NA	NA	NA	NA	NA	NA	NA	NA	NA	NA	NA	NA	NA	NA	NA	NA	NA	NA	NA	NA	NA	NA	NA	NA	NA	NA	NA	NA	NA	NA	NA	NA
Q92835	INPP5D	Phosphatidylinositol 3,4,5-trisphosphate 5-phosphatase 1 OS=Homo sapiens OX=9606 GN=INPP5D PE=1 SV=2	NA	NA	NA	NA	NA	NA	NA	NA	NA	NA	NA	NA	NA	NA	NA	NA	5.69976	6.63732	3.29962	3.16652	0.680044	0.32778	2.077	1.83172	NA	NA	NA	NA	NA	NA	NA	NA	NA	NA	1.59251	1.5015	1.43008	1.68915	1.86064	1.99073	1.58865	1.48586	1.52277	1.57614	NA	NA	NA
Q92859	NEO1	Neogenin OS=Homo sapiens OX=9606 GN=NEO1 PE=1 SV=2	0.754451	1.02975	0.969895	0.900314	1.07111	1.01544	1.26602	1.19872	0.918403	1.07296	1.02754	0.974747	1.0896	1.04059	0.97942	1.22332	NA	NA	NA	NA	NA	NA	NA	NA	1.07587	1.01769	0.810116	1.045	0.82302	0.942197	1.04016	0.964063	1.03433	1.11481	NA	NA	NA	NA	NA	NA	NA	NA	NA	NA	NA	NA	NA
Q92889	ERCC4	DNA repair endonuclease XPF OS=Homo sapiens OX=9606 GN=ERCC4 PE=1 SV=3	NA	NA	NA	NA	NA	NA	NA	NA	NA	NA	NA	NA	NA	NA	NA	NA	NA	NA	NA	NA	NA	NA	NA	NA	NA	NA	NA	NA	NA	NA	NA	NA	NA	NA	NA	NA	NA	NA	NA	NA	NA	NA	NA	NA	NA	NA	NA
Q92954	PRG4	Proteoglycan 4 OS=Homo sapiens OX=9606 GN=PRG4 PE=1 SV=3	1.04001	0.934781	1.22893	0.886136	1.18987	1.21605	1.04131	0.870671	0.825878	0.984866	1.20305	1.22213	1.35971	1.53156	1.22799	1.35163	0.956741	1.15221	0.932257	0.957603	0.810116	0.754295	0.991304	0.951055	1.28316	1.18641	1.18822	0.958201	1.13092	1.13587	1.26541	1.13982	1.00737	1.06061	1.01487	0.791028	1.24289	0.90532	1.16457	1.22451	1.04059	0.960195	1.1321	0.956144	1.36122	1.34388	1.48957
Q93070	ART4	Ecto-ADP-ribosyltransferase 4 OS=Homo sapiens OX=9606 GN=ART4 PE=2 SV=2	NA	NA	NA	NA	NA	NA	NA	NA	0.667944	0.889952	0.76945	1.23371	1.1969	1.59671	1.1708	1.26365	0.777762	0.768811	0.518458	0.743137	0.694478	0.783497	0.570066	0.828171	NA	NA	NA	NA	NA	NA	NA	NA	NA	NA	1.33719	1.29675	1.32381	1.21041	1.48298	2.39712	1.67365	2.32705	1.8542	0.723417	NA	NA	NA
Q93088	BHMT	Betaine--homocysteine S-methyltransferase 1 OS=Homo sapiens OX=9606 GN=BHMT PE=1 SV=2	NA	NA	NA	NA	NA	NA	NA	NA	0.451595	0.617367	0.541225	0.572243	0.618995	0.58927	0.700133	1.71309	2.5396	0.874057	4.24099	1.49433	0.901625	0.94514	0.864298	0.747736	NA	NA	NA	NA	NA	NA	NA	NA	NA	NA	NA	NA	NA	NA	NA	NA	NA	NA	NA	NA	NA	NA	NA
Q96EK7	FAM120B	Constitutive coactivator of peroxisome proliferator-activated receptor gamma OS=Homo sapiens OX=9606 GN=FAM120B PE=1 SV=1	NA	NA	NA	NA	NA	NA	NA	NA	1.54993	2.15129	1.67621	1.07938	1.72584	1.51992	1.38886	1.27996	0.932968	1.2571	1.3992	1.16143	1.20748	1.42158	0.668083	0.616939	NA	NA	NA	NA	NA	NA	NA	NA	NA	NA	NA	NA	NA	NA	NA	NA	NA	NA	NA	NA	NA	NA	NA
Q96FE7	PIK3IP1	Phosphoinositide-3-kinase-interacting protein 1 OS=Homo sapiens OX=9606 GN=PIK3IP1 PE=1 SV=2	0.999653	1.13391	1.30613	4.58938	0.915988	0.985549	0.704221	1.02541	NA	NA	NA	NA	NA	NA	NA	NA	0.475659	0.793169	0.523478	0.7644	0.786163	0.540812	0.636045	0.327735	1.21714	0.914782	0.908967	0.787417	0.824048	0.870973	2.47976	1.36718	0.676565	0.731434	NA	NA	NA	NA	NA	NA	NA	NA	NA	NA	NA	NA	NA
Q96IY4	CPB2	Carboxypeptidase B2 OS=Homo sapiens OX=9606 GN=CPB2 PE=1 SV=2	0.992198	0.760806	0.976776	1.09482	0.999931	0.961661	0.994815	0.832949	0.966204	1.03168	0.9973	1.04413	0.907771	1.2079	0.971375	1.4023	0.971712	0.876059	0.932839	1.19474	0.992886	1.05241	0.909976	1.09726	1.01755	1.1433	1.02363	0.908715	1.06851	1.07602	1.07162	0.882458	1.14266	0.946714	1.10038	1.05497	1.28289	1.16546	1.00682	1.2379	1.0237	1.11334	1.02633	0.997854	1.11458	1.09331	1.2524
Q96J42	TXNDC15	Thioredoxin domain-containing protein 15 OS=Homo sapiens OX=9606 GN=TXNDC15 PE=1 SV=1	1.17568	1.31394	0.71837	0.456156	1.62665	1.19309	0.936597	1.07848	NA	NA	NA	NA	NA	NA	NA	NA	1.05929	1.13989	1.22095	1.22137	1.14766	4.57699	0.6939	0.784204	NA	NA	NA	NA	NA	NA	NA	NA	NA	NA	NA	NA	NA	NA	NA	NA	NA	NA	NA	NA	NA	NA	NA
Q96KN2	CNDP1	Beta-Ala-His dipeptidase OS=Homo sapiens OX=9606 GN=CNDP1 PE=1 SV=4	0.783497	0.553057	0.677128	0.726281	0.985959	0.904693	0.92974	0.706225	1.15741	1.17723	0.916369	1.33923	0.833989	1.1823	0.777546	0.816599	1.0887	1.05263	0.820059	1.13784	1.01593	1.11915	1.20782	1.34388	0.826393	1.17471	0.947567	0.751372	1.34798	1.26716	1.32629	0.905508	1.4566	1.09855	1.00898	1.02122	1.12943	1.00556	1.09984	1.62586	1.11829	1.11311	1.07021	1.03944	1.18279	1.43098	1.33376
Q96LX7	CCDC17	Coiled-coil domain-containing protein 17 OS=Homo sapiens OX=9606 GN=CCDC17 PE=1 SV=2	NA	NA	NA	NA	NA	NA	NA	NA	NA	NA	NA	NA	NA	NA	NA	NA	NA	NA	NA	NA	NA	NA	NA	NA	NA	NA	NA	NA	NA	NA	NA	NA	NA	NA	1.29029	0.913388	2.20809	1.28032	1.79179	1.48834	1.04826	0.797911	1.7708	1.31112	NA	NA	NA
Q96LZ7	RMDN2	Regulator of microtubule dynamics protein 2 OS=Homo sapiens OX=9606 GN=RMDN2 PE=1 SV=2	0.855002	0.845338	1.14798	1.10565	1.1837	1.39581	0.924535	0.677738	1.24773	1.14116	1.15958	1.04008	1.17373	1.26699	1.19243	0.833353	NA	NA	NA	NA	NA	NA	NA	NA	2.05708	1.68798	1.1042	1.12202	0.953232	1.32308	1.12428	1.25946	2.06394	2.57273	NA	NA	NA	NA	NA	NA	NA	NA	NA	NA	NA	NA	NA
Q96M27	PRRC1	Protein PRRC1 OS=Homo sapiens OX=9606 GN=PRRC1 PE=1 SV=1	0.625118	0.804687	0.75576	0.810621	0.909156	0.723618	0.966204	1.31713	NA	NA	NA	NA	NA	NA	NA	NA	1.16215	1.26216	1.13414	1.12202	1.14084	1.22544	1.24764	1.03333	NA	NA	NA	NA	NA	NA	NA	NA	NA	NA	NA	NA	NA	NA	NA	NA	NA	NA	NA	NA	NA	NA	NA
Q96NZ9	PRAP1	Proline-rich acidic protein 1 OS=Homo sapiens OX=9606 GN=PRAP1 PE=1 SV=2	0.936402	1.11775	1.73267	1.46937	1.18009	1.25232	1.59472	1.26962	0.751216	0.958068	0.733618	0.827884	1.09346	1.14663	0.996126	1.03526	0.802793	0.894219	1.05241	0.969424	0.964398	0.848802	1.01988	1.05797	1.01692	0.912376	1.37487	1.52478	0.901001	0.986643	1.04812	1.03204	0.714398	0.68231	1.15805	0.710004	1.42484	0.892485	0.839382	0.685772	2.60322	1.82906	0.840256	0.889212	1.04551	0.754556	1.1088
Q96PD5	PGLYRP2	N-acetylmuramoyl-L-alanine amidase OS=Homo sapiens OX=9606 GN=PGLYRP2 PE=1 SV=1	0.769717	0.635164	0.855595	0.778841	0.950527	0.841188	0.883928	0.754347	1.04174	1.00139	0.980711	1.1098	1.0009	1.35802	1.13634	1.0225	1.15877	1.19251	0.889212	0.908778	1.02441	1.58249	1.12584	1.63671	1.02669	1.84894	1.11466	0.951318	1.13336	0.947107	1.4838	1.05651	1.68845	1.52859	0.991579	1.18962	1.10719	1.03054	1.0148	1.3959	1.29433	1.48514	1.23945	1.46642	0.765885	0.982684	0.801459
Q96Q06	PLIN4	Perilipin-4 OS=Homo sapiens OX=9606 GN=PLIN4 PE=1 SV=2	0.765036	1.00912	1.23465	1.24695	0.627245	0.815751	0.721364	0.633185	0.946058	0.935494	0.995229	0.518171	1.11419	1.00333	0.857852	0.533626	0.836594	0.966539	1.14679	0.955151	1.21218	0.981187	0.693948	0.731231	0.636883	0.489574	0.892918	0.616042	0.759752	1.09437	0.893723	0.430893	0.434401	0.504351	NA	NA	NA	NA	NA	NA	NA	NA	NA	NA	NA	NA	NA
Q96RL7	VPS13A	Vacuolar protein sorting-associated protein 13A OS=Homo sapiens OX=9606 GN=VPS13A PE=1 SV=2	0.68392	0.83822	0.432958	0.299307	0.802737	0.665034	0.428094	0.87612	NA	NA	NA	NA	NA	NA	NA	NA	0.511462	0.739028	0.474211	0.531301	0.719367	0.691499	0.895584	0.892733	0.365464	0.432658	0.588168	0.658886	0.930772	1.24237	0.517776	0.577663	1.02961	0.938221	1.51656	1.32409	0.909913	0.837871	1.14369	0.912186	1.24169	0.956078	0.91904	0.777977	0.930837	1.32244	1.35717
Q96T68	SETDB2	Histone-lysine N-methyltransferase SETDB2 OS=Homo sapiens OX=9606 GN=SETDB2 PE=1 SV=2	0.67544	0.698049	0.8461	0.672684	0.874057	0.906325	0.749916	0.541037	0.997508	0.961527	1.05555	1.06054	0.71852	0.873876	0.783823	0.575226	0.786926	0.931676	0.723167	0.67882	0.858565	0.842647	0.928066	0.906136	1.36689	1.13532	1.07021	1.24539	1.00333	1.03843	1.2578	1.17283	0.964398	1.04406	1.86607	1.26103	1.95735	1.32326	1.47315	1.3045	1.63592	1.25345	1.33876	1.35379	0.944944	0.900564	1.34994
Q99426	TBCB	Tubulin-folding cofactor B OS=Homo sapiens OX=9606 GN=TBCB PE=1 SV=2	1.19657	1.11404	1.31021	1.13682	1.2008	1.06563	1.14981	0.980167	NA	NA	NA	NA	NA	NA	NA	NA	0.940957	0.595305	0.920188	0.944616	1.01946	0.861427	0.934327	0.894219	NA	NA	NA	NA	NA	NA	NA	NA	NA	NA	NA	NA	NA	NA	NA	NA	NA	NA	NA	NA	NA	NA	NA
Q99439	CNN2	Calponin-2 OS=Homo sapiens OX=9606 GN=CNN2 PE=1 SV=4	NA	NA	NA	NA	NA	NA	NA	NA	NA	NA	NA	NA	NA	NA	NA	NA	1.18263	0.996609	1.00215	1.06334	1.22078	1.0213	1.00605	0.985754	NA	NA	NA	NA	NA	NA	NA	NA	NA	NA	1.13469	1.85035	1.64638	2.56685	1.3686	1.4757	1.52806	2.14444	1.66394	1.92439	1.60848	1.99225	1.64365
Q99497	PARK7	Protein/nucleic acid deglycase DJ-1 OS=Homo sapiens OX=9606 GN=PARK7 PE=1 SV=2	1.01466	0.963863	1.80776	2.67215	0.97124	0.872	0.699841	1.22774	1.24686	0.816826	1.17072	1.05841	0.969155	0.867418	0.958666	0.905383	1.27987	1.19044	0.892856	0.811183	0.928002	0.944158	0.917449	0.754399	1.67679	1.09566	1.09134	1.26778	1.3535	1.17218	1.09581	1.38703	1.05768	1.34527	1.07684	1.37611	1.04377	1.83808	1.43336	1.06888	0.90985	1.4649	1.23191	1.61586	0.748306	1.072	1.79514
Q99715	COL12A1	Collagen alpha-1(XII) chain OS=Homo sapiens OX=9606 GN=COL12A1 PE=1 SV=2	NA	NA	NA	NA	NA	NA	NA	NA	0.984866	1.30233	1.07438	0.732094	1.71345	1.44253	1.25206	1.16199	NA	NA	NA	NA	NA	NA	NA	NA	1.66255	1.07363	0.729814	0.782141	1.4649	1.77448	0.792015	0.717176	1.69737	1.63637	NA	NA	NA	NA	NA	NA	NA	NA	NA	NA	NA	NA	NA
Q99784	OLFM1	Noelin OS=Homo sapiens OX=9606 GN=OLFM1 PE=1 SV=4	0.834104	0.88835	1.23046	0.875998	0.982957	0.874603	0.771747	0.976709	0.998338	1.03944	1.06238	1.10061	1.03692	1.1805	1.2023	1.16878	0.998407	1.22264	1.00354	0.979896	1.06076	1.24212	1.15821	1.34994	1.09574	1.21554	1.07081	1.04138	0.911744	0.973802	1.12763	1.03613	1.11822	1.10366	NA	NA	NA	NA	NA	NA	NA	NA	NA	NA	0.668037	0.875695	0.601068
Q99952	PTPN18	Tyrosine-protein phosphatase non-receptor type 18 OS=Homo sapiens OX=9606 GN=PTPN18 PE=1 SV=2	NA	NA	NA	NA	NA	NA	NA	NA	NA	NA	NA	NA	NA	NA	NA	NA	NA	NA	NA	NA	NA	NA	NA	NA	NA	NA	NA	NA	NA	NA	NA	NA	NA	NA	0.898693	1.24807	0.815468	1.2105	1.58832	0.806139	0.837987	1.13179	1.406	1.64867	1.19524	1.42771	1.12342
Q99969	RARRES2	Retinoic acid receptor responder protein 2 OS=Homo sapiens OX=9606 GN=RARRES2 PE=1 SV=1	0.733821	0.910733	1.4903	1.05804	1.00919	1.02897	1.2126	1.07878	0.73184	0.753772	0.769824	1.06076	0.843523	1.21563	0.975288	0.687247	0.948421	1.00069	1.06784	1.07497	1.18329	1.22629	1.42227	1.67749	1.0657	1.31085	1.16902	1.49278	0.909976	1.11675	1.09718	1.19823	1.35613	1.35144	0.869646	0.86083	1.03821	0.960528	0.654062	1.16498	0.882825	1.00835	0.784747	0.992611	1.25963	1.20807	1.12576
Q9BQE3	TUBA1C	Tubulin alpha-1C chain OS=Homo sapiens OX=9606 GN=TUBA1C PE=1 SV=1	0.977657	0.728752	1.03505	1.83401	0.899565	0.987738	1.05511	1.67226	1.52277	0.951978	1.17365	1.13139	1.23619	0.871879	0.903189	0.840547	0.949474	0.653201	0.917958	0.794379	1.09013	1.01995	1.10796	1.11791	0.947304	1.09931	1.02342	0.967545	1.11458	1.33099	0.951318	0.785564	1.15621	1.20205	0.881786	1.59339	1.22637	1.65577	0.820343	1.04739	1.29765	1.73773	1.04008	1.85433	0.905446	1.28636	1.15245
Q9BTY2	FUCA2	Plasma alpha-L-fucosidase OS=Homo sapiens OX=9606 GN=FUCA2 PE=1 SV=2	0.817505	0.80257	1.14353	1.66232	0.928452	1.05249	0.978199	1.24229	0.85803	1.16902	1.23533	1.19681	1.09036	1.28165	1.28886	1.17186	0.960928	0.834567	0.815977	0.923126	0.940957	0.90532	0.871456	0.840547	0.942393	1.13737	0.946386	0.892671	0.994401	1.11404	1.20272	1.08862	1.12584	0.964531	1.25536	1.09657	1.17568	0.879527	0.918786	0.983775	1.1065	0.92492	0.898195	0.873997	1.20849	1.01038	1.22603
Q9BUQ8	DDX23	Probable ATP-dependent RNA helicase DDX23 OS=Homo sapiens OX=9606 GN=DDX23 PE=1 SV=3	NA	NA	NA	NA	NA	NA	NA	NA	0.827597	1.16328	0.890755	0.772603	1.24885	1.63275	1.44063	1.27147	NA	NA	NA	NA	NA	NA	NA	NA	0.46487	0.509587	0.844225	0.79207	0.771266	1.07192	0.772711	0.684394	0.666742	0.610093	NA	NA	NA	NA	NA	NA	NA	NA	NA	NA	NA	NA	NA
Q9BWD1	ACAT2	Acetyl-CoA acetyltransferase, cytosolic OS=Homo sapiens OX=9606 GN=ACAT2 PE=1 SV=2	NA	NA	NA	NA	NA	NA	NA	NA	NA	NA	NA	NA	NA	NA	NA	NA	1.02045	0.962128	1.15341	0.872544	0.901063	0.811015	0.782792	0.837987	NA	NA	NA	NA	NA	NA	NA	NA	NA	NA	1.0329	1.25972	1.17829	1.26042	1.03641	1.08862	1.41991	1.51961	0.757543	1.21487	NA	NA	NA
Q9BWP8	COLEC11	Collectin-11 OS=Homo sapiens OX=9606 GN=COLEC11 PE=1 SV=1	0.882825	0.627158	0.854884	1.09794	0.893414	0.782086	0.979828	0.902688	0.932451	1.00264	0.883009	1.08802	0.86814	1.0579	1.01586	1.06718	0.862144	0.780895	0.811465	1.17846	0.922551	1.12607	1.09946	1.20297	0.778571	1.21293	1.16692	1.08771	1.27262	1.04913	1.49309	0.946123	1.54178	0.845514	0.699405	1.08621	1.20089	1.0752	0.658201	1.28592	1.18034	1.27863	1.00298	1.06164	NA	NA	NA
Q9BXR6	CFHR5	Complement factor H-related protein 5 OS=Homo sapiens OX=9606 GN=CFHR5 PE=1 SV=1	1.12818	1.36169	1.53039	1.25806	1.30324	1.44985	1.28218	1.03304	0.909597	0.823877	0.871033	1.22833	1.24126	1.46561	1.48011	0.99516	1.16659	1.32721	1.19011	1.22188	1.32804	1.18083	1.58173	1.2544	1.1491	1.224	1.22112	1.47458	1.01262	1.05673	1.31303	1.12194	1.22637	1.06947	0.488016	0.402399	0.60441	0.37906	0.508458	0.473587	0.497476	0.397934	0.468591	0.339622	0.335876	0.308619	0.358514
Q9BYE9	CDHR2	Cadherin-related family member 2 OS=Homo sapiens OX=9606 GN=CDHR2 PE=1 SV=2	1.51761	1.82817	1.63241	1.2361	1.08192	0.954621	1.00146	0.993299	NA	NA	NA	NA	NA	NA	NA	NA	0.5269	0.334227	0.426377	0.523333	0.387186	0.343814	0.604536	0.456852	3.32972	1.3262	1.24005	0.944616	0.498823	0.562997	0.680091	0.423784	0.958932	0.605752	NA	NA	NA	NA	NA	NA	NA	NA	NA	NA	NA	NA	NA
Q9GZT6	CCDC90B	Coiled-coil domain-containing protein 90B, mitochondrial OS=Homo sapiens OX=9606 GN=CCDC90B PE=1 SV=2	0.920251	1.02222	0.731536	0.545972	0.680704	0.621575	0.459202	0.922039	1.41863	1.65382	1.23499	0.872544	1.32354	1.18583	0.978674	0.704172	1.24574	1.32152	1.29173	1.0814	0.809835	0.550304	0.812534	0.669335	0.79863	0.765991	1.44623	1.14878	1.06932	1.34025	0.819207	0.858804	0.812421	0.768544	3.34058	2.19026	0.608952	0.570856	1.21108	1.15245	0.901126	0.689776	0.793884	0.66508	1.19284	0.917195	1.21773
Q9GZT8	NIF3L1	NIF3-like protein 1 OS=Homo sapiens OX=9606 GN=NIF3L1 PE=1 SV=2	NA	NA	NA	NA	NA	NA	NA	NA	0.925561	1.11528	0.966874	1.09285	0.83642	1.08915	0.760753	0.955945	NA	NA	NA	NA	NA	NA	NA	NA	0.96929	1.31358	1.19086	0.966405	1.31385	1.08065	1.55251	0.91048	1.20506	0.837813	0.674738	0.806195	0.94442	0.790315	0.707009	0.819605	1.55401	1.42553	0.749968	0.744323	NA	NA	NA
Q9H0U4	RAB1B	Ras-related protein Rab-1B OS=Homo sapiens OX=9606 GN=RAB1B PE=1 SV=1	1.2262	1.20631	1.68354	1.21268	1.00933	1.26707	1.08425	1.37126	NA	NA	NA	NA	NA	NA	NA	NA	0.967746	1.78497	1.29558	0.998061	0.782249	0.660761	0.604662	0.488693	NA	NA	NA	NA	NA	NA	NA	NA	NA	NA	NA	NA	NA	NA	NA	NA	NA	NA	NA	NA	0.925048	1.67342	1.22799
Q9H160	ING2	Inhibitor of growth protein 2 OS=Homo sapiens OX=9606 GN=ING2 PE=1 SV=2	NA	NA	NA	NA	NA	NA	NA	NA	1.38444	1.81303	1.26418	1.01059	1.42375	1.16732	1.01819	0.879588	1.02648	1.08576	1.43356	1.17895	1.02697	0.578545	1.01875	0.772389	NA	NA	NA	NA	NA	NA	NA	NA	NA	NA	NA	NA	NA	NA	NA	NA	NA	NA	NA	NA	NA	NA	NA
Q9H269	VPS16	Vacuolar protein sorting-associated protein 16 homolog OS=Homo sapiens OX=9606 GN=VPS16 PE=1 SV=2	0.361934	0.259499	0.215267	0.239218	0.385366	0.204277	0.249031	0.26409	0.423461	0.761967	0.585767	0.381433	0.790151	0.783334	0.439672	1.14894	0.347455	0.599196	0.481531	0.584065	0.360632	0.63728	0.241987	0.638828	1.9726	1.71916	0.872302	0.897448	0.867178	1.60915	0.672124	0.824505	1.43794	1.3807	1.23765	1.32813	0.680987	1.41991	1.21723	1.76076	1.04804	1.27952	1.06592	1.64524	NA	NA	NA
Q9H299	SH3BGRL3	SH3 domain-binding glutamic acid-rich-like protein 3 OS=Homo sapiens OX=9606 GN=SH3BGRL3 PE=1 SV=1	0.551487	0.543933	0.593656	0.795426	0.546919	0.456188	0.604997	0.69926	1.16999	0.673804	0.947633	0.928195	0.916813	0.831392	0.839673	0.961061	1.49123	0.942131	0.900251	0.862741	0.85518	0.854469	0.994332	0.865197	1.51142	0.843991	0.643004	0.705589	0.9084	0.750748	0.543367	1.10596	0.624815	0.965267	0.513096	1.56157	1.18394	4.1468	1.37364	0.946779	0.919295	2.30441	2.12447	3.6754	1.27156	1.89172	1.10673
Q9H4A9	DPEP2	Dipeptidase 2 OS=Homo sapiens OX=9606 GN=DPEP2 PE=1 SV=3	0.930837	1.41716	1.30722	0.930708	1.13273	0.943504	1.00069	1.22357	0.798797	0.865137	0.900626	1.00549	1.12904	1.11489	1.14758	0.970567	0.971173	1.00947	0.974072	0.974815	0.883621	0.873089	0.8511	0.896391	1.13202	1.03965	1.16288	1.13839	0.989451	1.12998	1.0122	1.15053	1.04783	1.07111	1.29289	0.936467	0.905195	0.778625	1.19972	1.24842	1.25432	1.24375	1.15613	1.0615	0.865317	1.2013	0.834741
Q9H4B7	TUBB1	Tubulin beta-1 chain OS=Homo sapiens OX=9606 GN=TUBB1 PE=1 SV=1	1.15301	0.473554	0.868742	1.16805	0.820571	0.690589	0.728752	0.714992	0.972588	0.571332	0.680751	0.799849	0.800126	0.687199	0.624468	0.644253	1.00835	0.992336	0.582125	0.80374	0.822621	1.01642	0.869586	1.03699	1.12086	1.5593	0.930708	1.13579	1.15237	1.24608	1.09946	1.1591	1.30958	1.60882	1.08937	2.15009	1.40932	2.07426	1.68974	1.93308	1.7188	2.32947	2.3264	2.1431	1.44333	2.83471	4.27967
Q9H4G4	GLIPR2	Golgi-associated plant pathogenesis-related protein 1 OS=Homo sapiens OX=9606 GN=GLIPR2 PE=1 SV=3	0.87206	1.13281	1.36358	0.959996	1.36056	1.8134	1.52172	1.03634	1.07579	1.32537	1.64467	1.65428	1.04688	1.13839	0.996264	1.01431	0.990686	1.29909	1.15125	1.12047	1.14965	0.852221	1.2928	0.949276	1.12039	1.07073	1.91587	0.978809	0.975017	0.895025	1.20122	0.934004	0.922615	0.865077	1.21092	0.994263	1.24298	0.943765	1.02569	1.05431	1.19152	1.14472	1.0319	0.910922	0.906953	0.798132	1.10145
Q9H6R3	ACSS3	Acyl-CoA synthetase short-chain family member 3, mitochondrial OS=Homo sapiens OX=9606 GN=ACSS3 PE=1 SV=1	NA	NA	NA	NA	NA	NA	NA	NA	NA	NA	NA	NA	NA	NA	NA	NA	NA	NA	NA	NA	NA	NA	NA	NA	NA	NA	NA	NA	NA	NA	NA	NA	NA	NA	1.25727	1.05314	0.83642	0.631039	0.387186	0.447823	1.83401	1.53666	0.777654	0.539801	NA	NA	NA
Q9H6X2	ANTXR1	Anthrax toxin receptor 1 OS=Homo sapiens OX=9606 GN=ANTXR1 PE=1 SV=2	NA	NA	NA	NA	NA	NA	NA	NA	0.822564	0.920698	0.931353	1.17503	0.905948	0.955945	1.14401	1.3396	1.25266	1.8363	1.77338	1.7949	1.55531	1.66717	1.55725	1.81831	0.985754	1.20214	1.0284	1.19781	1.14274	1.19391	1.13556	1.27925	1.24332	1.36339	NA	NA	NA	NA	NA	NA	NA	NA	NA	NA	0.413139	0.432209	0.472112
Q9H8L6	MMRN2	Multimerin-2 OS=Homo sapiens OX=9606 GN=MMRN2 PE=1 SV=2	0.523986	0.551526	0.754399	0.783606	0.580231	0.517238	0.515198	0.759331	0.573116	0.654924	0.757543	0.697469	0.725376	0.94573	0.871819	0.872121	NA	NA	NA	NA	NA	NA	NA	NA	NA	NA	NA	NA	NA	NA	NA	NA	NA	NA	NA	NA	NA	NA	NA	NA	NA	NA	NA	NA	1.40688	1.71475	0.740617
Q9H8S9	MOB1A	MOB kinase activator 1A OS=Homo sapiens OX=9606 GN=MOB1A PE=1 SV=4	NA	NA	NA	NA	NA	NA	NA	NA	1.52637	0.918977	1.29855	1.15181	1.07274	1.05607	1.14417	1.03915	1.35905	0.833353	0.71326	0.807985	0.969827	1.12498	1.00821	0.988628	1.73375	1.32951	0.991579	1.21748	1.70208	1.21546	1.11954	1.42919	1.56125	1.41657	NA	NA	NA	NA	NA	NA	NA	NA	NA	NA	1.00229	0.987053	0.830182
Q9HBB8	CDHR5	Cadherin-related family member 5 OS=Homo sapiens OX=9606 GN=CDHR5 PE=1 SV=3	0.681743	0.634723	0.869104	0.968215	0.837639	0.753929	0.857257	1.08643	NA	NA	NA	NA	NA	NA	NA	NA	NA	NA	NA	NA	NA	NA	NA	NA	1.85189	2.15144	1.0101	1.44784	1.06113	1.02527	1.0968	0.954423	1.02754	1.44603	NA	NA	NA	NA	NA	NA	NA	NA	NA	NA	NA	NA	NA
Q9HBI1	PARVB	Beta-parvin OS=Homo sapiens OX=9606 GN=PARVB PE=1 SV=1	NA	NA	NA	NA	NA	NA	NA	NA	NA	NA	NA	NA	NA	NA	NA	NA	1.02598	1.4757	1.20389	1.84933	1.14346	1.40756	NA	1.46795	NA	NA	NA	NA	NA	NA	NA	NA	NA	NA	2.40244	1.6489	4.30615	3.59353	1.54414	1.18312	2.93488	3.27683	1.54339	1.46287	1.29199	1.51079	1.89461
Q9HBR0	SLC38A10	Putative sodium-coupled neutral amino acid transporter 10 OS=Homo sapiens OX=9606 GN=SLC38A10 PE=1 SV=2	1.00298	1.14322	0.853522	0.978199	0.946123	0.895149	0.878309	0.857079	0.78328	2.17226	0.637059	1.30949	1.73724	1.0654	1.71238	0.782683	NA	NA	NA	NA	NA	NA	NA	NA	NA	NA	NA	NA	NA	NA	NA	NA	NA	NA	1.11042	1.01939	1.35999	0.89994	0.997024	0.766151	0.840489	0.764665	0.663009	0.700667	NA	NA	NA
Q9HCU0	CD248	Endosialin OS=Homo sapiens OX=9606 GN=CD248 PE=1 SV=1	NA	NA	NA	NA	NA	NA	NA	NA	NA	NA	NA	NA	NA	NA	NA	NA	0.930579	1.17153	1.39581	1.27597	1.23679	1.03692	0.825363	0.741439	0.489032	0.380772	2.39463	1.10719	0.576423	0.513986	1.04841	0.523913	0.580553	0.385446	NA	NA	NA	NA	NA	NA	NA	NA	NA	NA	NA	NA	NA
Q9HDC9	APMAP	Adipocyte plasma membrane-associated protein OS=Homo sapiens OX=9606 GN=APMAP PE=1 SV=2	1.38742	0.70799	0.887119	1.13658	2.04472	1.33589	0.987875	0.617067	1.38886	1.32666	0.759541	1.08734	0.844986	1.38569	0.708579	1.03498	0.80207	0.608403	0.632396	0.787144	1.0579	1.0344	1.58623	1.13233	0.727591	0.795867	1.90713	0.775662	1.40454	0.827482	0.965535	0.658657	1.04261	0.843173	0.880259	1.19491	1.20014	1.00786	0.783606	1.32436	1.28636	1.45458	1.04834	0.865197	1.45983	1.27961	0.630164
Q9NP70	AMBN	Ameloblastin OS=Homo sapiens OX=9606 GN=AMBN PE=1 SV=1	NA	NA	NA	NA	NA	NA	NA	NA	1.01953	1.09391	1.05753	1.10611	1.25458	1.46125	1.32161	0.976573	NA	NA	NA	NA	NA	NA	NA	NA	NA	NA	NA	NA	NA	NA	NA	NA	NA	NA	NA	NA	NA	NA	NA	NA	NA	NA	NA	NA	NA	NA	NA
Q9NP80	PNPLA8	Calcium-independent phospholipase A2-gamma OS=Homo sapiens OX=9606 GN=PNPLA8 PE=1 SV=1	0.944551	1.16264	0.962394	0.616383	1.27174	1.02769	1.28458	1.09232	1.07021	1.47621	1.00215	0.855892	1.63252	1.54307	2.40711	1.02307	0.943438	1.11342	1.06238	1.06422	0.880259	1.11636	1.09263	1.46125	1.06866	1.02392	0.990892	0.865857	1.22052	1.45892	0.917894	0.885952	0.994608	0.802292	0.965334	0.778895	1.10107	0.864417	0.684727	0.615786	1.50191	1.30279	1.27447	1.03915	1.43724	0.812703	1.58019
Q9NPG4	PCDH12	Protocadherin-12 OS=Homo sapiens OX=9606 GN=PCDH12 PE=1 SV=1	NA	NA	NA	NA	NA	NA	NA	NA	NA	NA	NA	NA	NA	NA	NA	NA	NA	NA	NA	NA	NA	NA	NA	NA	0.828056	1.27881	1.06651	1.00723	0.961128	0.92974	1.36917	0.985276	1.30432	1.07185	0.841713	0.866157	1.33376	0.77663	0.755027	1.24022	0.819207	1.34957	1.02997	1.11427	0.744116	1.05621	0.870732
Q9NPH3	IL1RAP	Interleukin-1 receptor accessory protein OS=Homo sapiens OX=9606 GN=IL1RAP PE=1 SV=2	0.814959	0.963529	1.12047	1.31494	1.11806	1.06918	1.32225	1.30414	1.09407	1.09977	1.11736	1.07244	1.12654	1.29936	1.10382	1.32051	1.16821	1.37669	1.2877	1.3074	0.887365	1.15365	1.19939	1.40094	0.950791	1.1169	0.934522	1.01755	0.87837	1.05607	0.909723	1.0372	1.13792	1.35971	0.830988	0.563661	1.02165	0.880198	1.18756	1.23029	1.20139	1.2018	1.15885	0.775554	0.612847	0.6952	0.708137
Q9NPY3	CD93	Complement component C1q receptor OS=Homo sapiens OX=9606 GN=CD93 PE=1 SV=3	0.880747	1.30704	1.11304	1.33293	1.18468	1.28218	1.46246	1.71654	1.52711	0.984662	1.34229	1.55111	1.20681	1.13343	1.50733	1.09369	0.666973	0.914845	0.795316	0.764559	0.804353	0.934846	0.875877	0.994126	1.00521	1.21218	1.00465	1.07408	0.929612	1.04638	0.973734	1.11512	1.05988	1.17797	1.12086	1.34742	0.918849	1.06172	0.969155	0.960262	1.0601	1.03908	0.917385	0.843757	1.15597	1.4149	0.737288
Q9NQ79	CRTAC1	Cartilage acidic protein 1 OS=Homo sapiens OX=9606 GN=CRTAC1 PE=1 SV=2	0.897323	1.02925	0.919933	0.663515	1.02477	0.896142	0.837406	0.754295	1.12163	1.01164	0.903627	1.12763	1.04008	1.18107	0.970769	0.731384	0.864477	0.798907	0.66952	0.762125	0.842588	1.34901	1.1902	1.43396	0.798907	1.05475	0.838859	0.756336	0.91548	0.84288	1.01565	0.893104	1.23405	0.978877	1.15181	1.32813	1.23739	1.09217	0.978063	1.43575	1.20689	1.33904	1.08343	1.36358	0.947107	1.02271	1.1479
Q9NR09	BIRC6	Baculoviral IAP repeat-containing protein 6 OS=Homo sapiens OX=9606 GN=BIRC6 PE=1 SV=2	NA	NA	NA	NA	NA	NA	NA	NA	1.91361	2.29899	1.61016	1.15749	2.22607	2.06609	1.60303	1.44965	NA	NA	NA	NA	NA	NA	NA	NA	1.4711	1.415	1.05988	1.20782	1.33274	1.75248	0.956409	0.817449	1.06489	0.914148	NA	NA	NA	NA	NA	NA	NA	NA	NA	NA	NA	NA	NA
Q9NR31	SAR1A	GTP-binding protein SAR1a OS=Homo sapiens OX=9606 GN=SAR1A PE=1 SV=1	NA	NA	NA	NA	NA	NA	NA	NA	NA	NA	NA	NA	NA	NA	NA	NA	NA	NA	NA	NA	NA	NA	NA	NA	NA	NA	NA	NA	NA	NA	NA	NA	NA	NA	0.810116	1.86451	1.18723	2.31145	1.399	1.36188	1.1242	2.23349	1.33413	1.86827	1.09437	2.22916	1.40201
Q9NRW1	RAB6B	Ras-related protein Rab-6B OS=Homo sapiens OX=9606 GN=RAB6B PE=1 SV=1	0.892794	0.817505	0.971712	1.32446	1.01515	0.83266	0.911175	1.2274	0.983775	0.79037	0.738618	0.769717	0.936013	0.889644	0.980575	1.20572	NA	NA	NA	NA	NA	NA	NA	NA	NA	NA	NA	NA	NA	NA	NA	NA	NA	NA	0.834741	2.15517	1.14719	2.68738	1.36396	1.16934	1.60081	3.54405	1.5357	2.68775	0.635868	0.840023	0.682594
Q9NU22	MDN1	Midasin OS=Homo sapiens OX=9606 GN=MDN1 PE=1 SV=2	NA	NA	NA	NA	NA	NA	NA	NA	NA	NA	NA	NA	NA	NA	NA	NA	1.52679	1.8134	1.47488	1.44824	1.61407	0.991717	1.55089	0.93504	1.49786	0.922998	1.11644	1.29981	0.993643	0.916305	1.30785	1.24177	0.862741	0.814733	NA	NA	NA	NA	NA	NA	NA	NA	NA	NA	NA	NA	NA
Q9NYU2	UGGT1	UDP-glucose:glycoprotein glucosyltransferase 1 OS=Homo sapiens OX=9606 GN=UGGT1 PE=1 SV=3	NA	NA	NA	NA	NA	NA	NA	NA	NA	NA	NA	NA	NA	NA	NA	NA	1.30288	1.10045	1.57069	1.00584	1.10811	0.993712	0.983638	1.00382	NA	NA	NA	NA	NA	NA	NA	NA	NA	NA	NA	NA	NA	NA	NA	NA	NA	NA	NA	NA	NA	NA	NA
Q9NZ08	ERAP1	Endoplasmic reticulum aminopeptidase 1 OS=Homo sapiens OX=9606 GN=ERAP1 PE=1 SV=3	NA	NA	NA	NA	NA	NA	NA	NA	NA	NA	NA	NA	NA	NA	NA	NA	0.758174	0.933292	0.939653	0.856366	0.922551	1.5042	0.873573	1.13619	NA	NA	NA	NA	NA	NA	NA	NA	NA	NA	1.24582	1.22782	1.67702	1.03476	1.06925	0.857971	1.08523	0.932322	1.13194	0.98856	1.19185	0.892423	1.12912
Q9NZK5	ADA2	Adenosine deaminase 2 OS=Homo sapiens OX=9606 GN=ADA2 PE=1 SV=2	1.18929	1.14053	1.14227	1.07311	0.89329	0.761597	0.724019	1.02243	0.949079	0.975288	0.931224	1.07512	1.05694	1.31686	1.26751	1.07267	0.95694	1.05804	0.85803	0.984866	1.08005	1.34341	1.01326	1.29352	1.05387	1.06725	0.974139	1.33016	0.985686	1.07512	1.3583	1.35867	1.57636	1.1902	1.50212	1.00563	1.36113	1.34789	1.36557	1.34957	1.26523	1.24755	0.882887	0.759331	1.07274	1.10581	1.10275
Q9NZL9	MAT2B	Methionine adenosyltransferase 2 subunit beta OS=Homo sapiens OX=9606 GN=MAT2B PE=1 SV=1	0.90966	1.1632	0.836015	0.650987	1.05951	1.29513	1.07081	1.15749	0.932386	1.30026	0.978063	0.804297	1.18698	1.30252	1.29047	1.03598	0.937441	1.24703	1.39252	1.2812	1.48844	0.963663	0.948553	0.741953	NA	NA	NA	NA	NA	NA	NA	NA	NA	NA	NA	NA	NA	NA	NA	NA	NA	NA	NA	NA	1.36945	0.671565	1.3463
Q9NZN3	EHD3	EH domain-containing protein 3 OS=Homo sapiens OX=9606 GN=EHD3 PE=1 SV=2	1.12428	1.22078	1.17511	1.54146	1.03426	1.16143	1.06718	0.95112	1.26077	1.08832	0.969827	1.15397	0.937896	1.35745	1.275	1.02797	NA	NA	NA	NA	NA	NA	NA	NA	NA	NA	NA	NA	NA	NA	NA	NA	NA	NA	1.13014	1.65405	1.0041	1.79664	0.921081	1.0826	1.22027	2.14162	1.63944	1.63026	0.797579	0.852517	1.56352
Q9NZP8	C1RL	Complement C1r subcomponent-like protein OS=Homo sapiens OX=9606 GN=C1RL PE=1 SV=2	1.02307	1.23954	1.30523	1.25867	1.34239	1.15341	1.28985	1.26576	0.922742	0.935818	1.05937	1.15237	1.24444	1.43684	1.31267	1.2422	1.17283	1.20623	1.13226	1.23388	1.30197	1.31112	1.4062	1.16959	1.32758	1.24453	1.2223	1.40337	1.00069	1.02954	1.25214	1.25815	1.18633	1.09726	1.07938	0.732449	1.18772	0.80057	0.953827	0.817505	1.04081	0.834278	1.02144	0.786108	1.06762	0.877518	1.36179
Q9P1Z3	HCN3	Potassium/sodium hyperpolarization-activated cyclic nucleotide-gated channel 3 OS=Homo sapiens OX=9606 GN=HCN3 PE=1 SV=2	NA	NA	NA	NA	NA	NA	NA	NA	NA	NA	NA	NA	NA	NA	NA	NA	0.59514	0.756861	0.885338	0.996609	0.892856	0.693564	0.668593	0.616811	NA	NA	NA	NA	NA	NA	NA	NA	NA	NA	2.99966	4.14508	3.20895	3.79369	2.61552	3.07375	2.06294	2.64323	3.12986	2.89949	NA	NA	NA
Q9UBR2	CTSZ	Cathepsin Z OS=Homo sapiens OX=9606 GN=CTSZ PE=1 SV=1	0.911933	1.27403	1.29801	1.14274	1.21344	1.22799	1.34471	1.32767	0.793884	0.926652	0.828113	1.00612	1.05526	0.983298	1.45286	0.947698	NA	NA	NA	NA	NA	NA	NA	NA	1.13627	1.14132	1.07192	1.16554	0.956277	1.06962	1.36509	1.22154	1.10244	0.996126	1.19276	1.07684	1.33913	0.853344	0.891187	0.710251	1.02776	0.686295	0.85293	0.573673	NA	NA	NA
Q9UBT6	POLK	DNA polymerase kappa OS=Homo sapiens OX=9606 GN=POLK PE=1 SV=1	1.23619	1.46866	1.04442	1.01804	1.44373	1.37841	1.03011	1.51079	1.14457	1.74545	1.68319	1.53815	1.61161	1.49278	1.32235	1.09445	1.22019	1.32823	1.46896	1.34174	1.3064	0.598864	0.915163	0.73032	NA	NA	NA	NA	NA	NA	NA	NA	NA	NA	1.27403	1.09672	1.65657	1.43784	1.00236	1.02456	1.07631	0.960329	1.13887	0.974072	0.738004	0.594439	0.662182
Q9UBW5	BIN2	Bridging integrator 2 OS=Homo sapiens OX=9606 GN=BIN2 PE=1 SV=3	NA	NA	NA	NA	NA	NA	NA	NA	NA	NA	NA	NA	NA	NA	NA	NA	NA	NA	NA	NA	NA	NA	NA	NA	1.12568	0.870732	1.00835	0.920953	1.3055	0.86328	0.597786	1.24703	0.822963	1.11065	0.870309	2.51438	1.58821	3.27342	1.14528	1.45579	1.26567	2.88566	1.9526	3.32833	2.84317	1.85562	2.87408
Q9UBX1	CTSF	Cathepsin F OS=Homo sapiens OX=9606 GN=CTSF PE=1 SV=1	NA	NA	NA	NA	NA	NA	NA	NA	NA	NA	NA	NA	NA	NA	NA	NA	NA	NA	NA	NA	NA	NA	NA	NA	1.13863	1.40153	0.962728	1.12428	1.1395	1.33348	1.10023	0.96882	1.26786	1.21706	2.93773	1.80964	1.38511	1.12288	1.06829	1.24695	1.48288	1.45791	1.13863	1.06201	1.61295	1.30188	1.64114
Q9UBX5	FBLN5	Fibulin-5 OS=Homo sapiens OX=9606 GN=FBLN5 PE=1 SV=1	1.49464	0.924279	0.966271	1.34779	1.41608	1.31978	1.37316	0.921017	1.23765	1.26523	0.80491	1.41049	0.939002	1.23302	0.87043	1.11358	1.2612	0.94737	0.8777	1.20014	1.44714	1.48679	1.65887	1.47765	NA	NA	NA	NA	NA	NA	NA	NA	NA	NA	NA	NA	NA	NA	NA	NA	NA	NA	NA	NA	NA	NA	NA
Q9UGM5	FETUB	Fetuin-B OS=Homo sapiens OX=9606 GN=FETUB PE=1 SV=2	0.611871	0.647701	0.470968	0.277469	0.57411	0.588453	0.468201	0.338869	0.692507	0.732043	0.830643	0.943242	0.779597	1.13808	1.11288	0.702222	0.884173	0.762918	0.5637	0.618652	0.896888	1.03548	0.623301	0.908463	1.06128	1.04645	0.730725	0.995505	0.777169	1.0057	0.99654	1.20623	1.07818	1.09657	1.44744	1.15757	1.72632	1.45166	1.38108	1.42336	1.51299	1.43933	1.25614	1.04783	1.08907	1.48627	1.44914
Q9UHG3	PCYOX1	Prenylcysteine oxidase 1 OS=Homo sapiens OX=9606 GN=PCYOX1 PE=1 SV=3	0.811127	0.702174	0.874906	0.664205	0.765567	0.687962	0.738618	0.609628	0.842121	0.933486	0.95568	0.968685	0.848861	0.967545	0.833989	0.869525	0.787526	0.982003	0.950264	0.967813	0.836246	0.805692	0.881602	1.04623	1.08215	1.13816	0.88032	0.93271	0.885215	1.0344	0.922806	1.12678	1.13524	1.20439	0.982957	0.987532	1.0367	0.897075	1.1959	1.25597	1.06378	1.03965	1.08794	1.17985	1.01052	1.35952	1.25223
Q9UHV7	MED13	Mediator of RNA polymerase II transcription subunit 13 OS=Homo sapiens OX=9606 GN=MED13 PE=1 SV=3	0.942393	0.819775	0.703977	0.854824	1.33237	1.31458	1.16207	1.14528	NA	NA	NA	NA	NA	NA	NA	NA	NA	NA	NA	NA	NA	NA	NA	NA	NA	NA	NA	NA	NA	NA	NA	NA	NA	NA	NA	NA	NA	NA	NA	NA	NA	NA	NA	NA	NA	NA	NA
Q9UJJ9	GNPTG	N-acetylglucosamine-1-phosphotransferase subunit gamma OS=Homo sapiens OX=9606 GN=GNPTG PE=1 SV=1	1.01171	1.23585	1.24048	1.24807	1.19864	1.08147	1.24885	1.14599	0.802126	0.773461	1.05402	1.10542	1.09384	1.04239	0.943307	1.21108	0.679196	0.926395	1.04225	1.08493	0.803294	0.813266	0.761386	1.03864	1.10359	1.27766	0.956674	0.826107	1.09217	0.957537	1.21016	0.848743	1.13343	0.782466	1.10688	0.551373	1.65084	1.1765	0.850333	0.970096	1.32537	1.08937	0.971644	0.720665	0.781165	1.46835	0.885522
Q9UJU6	DBNL	Drebrin-like protein OS=Homo sapiens OX=9606 GN=DBNL PE=1 SV=1	NA	NA	NA	NA	NA	NA	NA	NA	NA	NA	NA	NA	NA	NA	NA	NA	0.639537	0.695441	0.586946	0.536481	0.648645	0.697565	0.672078	0.725325	NA	NA	NA	NA	NA	NA	NA	NA	NA	NA	1.05643	1.45811	0.803907	1.46469	1.01967	0.963462	0.953431	1.44633	0.982208	1.61451	1.18633	1.54189	1.34677
Q9UK55	SERPINA10	Protein Z-dependent protease inhibitor OS=Homo sapiens OX=9606 GN=SERPINA10 PE=1 SV=1	0.908715	1.00758	1.52753	0.842588	1.3185	1.383	1.28449	1.13461	0.999653	1.0442	1.12311	1.33256	1.24315	1.61284	1.47591	1.21546	1.17495	1.21218	1.02038	1.07162	1.22129	0.994539	1.12187	1.0339	0.95178	0.97468	1.15701	0.808321	0.871758	0.800237	1.04587	0.821937	1.0319	0.845983	1.09081	0.847274	1.09574	0.692843	1.0237	0.957404	1.26251	0.901001	1.11273	0.798243	1.2853	1.20339	1.54864
Q9UKU0	ACSL6	Long-chain-fatty-acid--CoA ligase 6 OS=Homo sapiens OX=9606 GN=ACSL6 PE=1 SV=4	NA	NA	NA	NA	NA	NA	NA	NA	NA	NA	NA	NA	NA	NA	NA	NA	NA	NA	NA	NA	NA	NA	NA	NA	0.557058	0.747995	0.803071	0.601235	0.824619	0.937246	3.75627	4.33941	0.928967	0.814169	NA	NA	NA	NA	NA	NA	NA	NA	NA	NA	NA	NA	NA
Q9UL46	PSME2	Proteasome activator complex subunit 2 OS=Homo sapiens OX=9606 GN=PSME2 PE=1 SV=4	0.917894	0.782683	0.976573	1.59251	1.12233	0.947567	0.989519	1.21218	0.662366	0.652523	0.746182	0.737441	0.650536	0.597123	0.530381	0.732754	1.01087	0.815355	0.909913	0.807033	0.886996	0.695055	0.651212	0.609754	1.13666	0.97495	0.812928	0.789713	0.896577	0.946254	0.909534	0.943373	0.806642	0.997715	0.933486	0.80681	1.04783	1.09202	1.39774	1.26628	1.90713	2.65093	1.82197	1.52658	0.747269	0.732246	0.919614
Q9ULI3	HEG1	Protein HEG homolog 1 OS=Homo sapiens OX=9606 GN=HEG1 PE=1 SV=3	1.25249	1.31722	1.15765	1.37031	0.908274	1.08719	0.995574	1.30387	1.09376	0.94783	1.17577	1.03828	1.0893	1.15869	1.44965	1.00807	NA	NA	NA	NA	NA	NA	NA	NA	NA	NA	NA	NA	NA	NA	NA	NA	NA	NA	1.91454	1.0471	1.07148	1.14393	1.30351	1.71	1.38329	1.37812	3.82034	3.05146	NA	NA	NA
Q9UN81	L1RE1	LINE-1 retrotransposable element ORF1 protein OS=Homo sapiens OX=9606 GN=L1RE1 PE=1 SV=1	0.79935	0.672357	0.408243	0.399731	0.856129	0.656697	1.04174	0.798741	1.0191	1.7846	1.35689	0.922998	1.56862	1.32216	0.894157	0.812759	0.524168	0.526498	0.781274	1.14148	1.54553	1.01988	0.319503	0.308128	NA	NA	NA	NA	NA	NA	NA	NA	NA	NA	NA	NA	NA	NA	NA	NA	NA	NA	NA	NA	NA	NA	NA
Q9UNW1	MINPP1	Multiple inositol polyphosphate phosphatase 1 OS=Homo sapiens OX=9606 GN=MINPP1 PE=1 SV=1	0.958533	1.01917	1.29585	0.885461	1.28556	1.39687	1.2954	1.24203	0.838568	0.796198	0.827597	0.905446	0.813943	0.959863	1.00807	0.931159	0.851159	0.95	0.913388	0.966874	0.954356	0.945533	0.943307	1.00139	1.26734	1.23465	1.02328	1.17462	1.2126	0.897013	1.03233	1.1228	1.19582	1.36292	1.47959	1.27721	1.34509	1.24755	1.32207	1.48844	1.23499	1.09939	0.90903	1.34462	1.10519	1.15557	1.0329
Q9UNZ2	NSFL1C	NSFL1 cofactor p47 OS=Homo sapiens OX=9606 GN=NSFL1C PE=1 SV=2	NA	NA	NA	NA	NA	NA	NA	NA	NA	NA	NA	NA	NA	NA	NA	NA	NA	NA	NA	NA	NA	NA	NA	NA	NA	NA	NA	NA	NA	NA	NA	NA	NA	NA	0.834278	1.44363	0.794655	1.84561	1.4024	1.11018	0.878248	1.4707	1.25588	1.52393	1.70456	1.57124	1.15029
Q9UPN9	TRIM33	E3 ubiquitin-protein ligase TRIM33 OS=Homo sapiens OX=9606 GN=TRIM33 PE=1 SV=3	2.03299	0.816995	1.25484	1.40893	1.8288	1.27068	1.39291	0.694093	1.91853	1.23465	0.770731	1.83744	0.652297	1.6659	0.817619	0.830528	NA	NA	NA	NA	NA	NA	NA	NA	0.666465	1.7022	0.901126	0.620155	1.56537	0.559186	1.99239	0.615828	1.53464	0.599944	1.12366	1.21192	2.2133	1.22315	1.03663	1.23072	1.49092	1.09475	1.52151	1.10811	2.41496	1.45458	1.79129
Q9UPQ3	AGAP1	Arf-GAP with GTPase, ANK repeat and PH domain-containing protein 1 OS=Homo sapiens OX=9606 GN=AGAP1 PE=1 SV=4	NA	NA	NA	NA	NA	NA	NA	NA	NA	NA	NA	NA	NA	NA	NA	NA	NA	NA	NA	NA	NA	NA	NA	NA	0.750488	0.673897	0.962995	1.5436	1.41686	1.6696	0.739848	0.578585	0.92287	0.783009	1.70574	1.23628	1.15461	0.840605	1.64433	1.32951	0.762125	0.746648	0.723467	0.573713	NA	NA	NA
Q9UPT6	MAPK8IP3	C-Jun-amino-terminal kinase-interacting protein 3 OS=Homo sapiens OX=9606 GN=MAPK8IP3 PE=1 SV=3	0.784421	0.466258	0.756651	1.0752	0.841013	0.756336	0.717425	0.406661	0.767958	0.880137	0.684727	0.762072	0.662595	0.936662	0.544914	0.920443	0.805468	0.7769	0.731282	1.02229	0.855417	0.963663	0.763183	1.03025	0.867479	1.27713	1.24496	0.605878	1.12467	0.856129	1.07096	0.598698	1.2441	0.997715	1.27863	1.42474	1.39978	1.14243	1.04913	1.46054	1.37012	1.5756	1.23748	1.49838	1.44764	1.4652	1.60092
Q9Y279	VSIG4	V-set and immunoglobulin domain-containing protein 4 OS=Homo sapiens OX=9606 GN=VSIG4 PE=1 SV=1	1.23251	1.14203	2.63646	3.79263	1.31722	1.49703	3.31383	2.38833	0.842121	0.821254	0.625985	0.801848	0.565853	0.636309	0.622049	1.36727	0.862861	0.645415	1.13808	1.23713	0.822279	0.550991	1.17723	0.655787	0.285468	0.414746	1.8754	0.634679	0.838278	0.599279	0.964331	0.360357	0.481631	0.317406	NA	NA	NA	NA	NA	NA	NA	NA	NA	NA	0.742107	0.477244	0.522608
Q9Y490	TLN1	Talin-1 OS=Homo sapiens OX=9606 GN=TLN1 PE=1 SV=3	1.06829	0.572243	0.908463	0.991511	0.88497	0.767639	0.849862	0.793114	1.9811	0.869525	1.03276	1.24539	1.07274	0.948553	0.904505	0.703635	1.22366	0.821937	0.696213	0.823134	1.06157	1.11497	0.901313	1.04406	1.35032	1.16651	1.12412	0.752467	1.37946	0.931159	0.923766	1.37326	0.942327	0.900189	0.810959	1.93576	1.11134	2.52398	0.956277	1.38693	1.18009	2.28074	1.383	2.42385	1.13634	2.06208	1.35191
Q9Y4L1	HYOU1	Hypoxia up-regulated protein 1 OS=Homo sapiens OX=9606 GN=HYOU1 PE=1 SV=1	0.979149	1.14568	1.44503	1.4648	1.07475	1.40708	1.76908	1.73135	0.908967	0.904191	0.882642	1.08561	1.12896	1.20239	0.957537	0.813323	0.911238	0.983843	1.15773	1.07319	0.886136	0.92319	1.11095	0.958666	1.48566	1.08043	1.32161	1.2861	0.759173	0.817619	0.941348	0.828573	1.01431	0.932322	1.34267	0.9652	1.60292	0.900064	1.56895	1.11473	1.87267	1.21706	1.43943	0.869766	NA	NA	NA
Q9Y4X4	KLF12	Krueppel-like factor 12 OS=Homo sapiens OX=9606 GN=KLF12 PE=1 SV=2	NA	NA	NA	NA	NA	NA	NA	NA	0.905069	0.945861	1.19491	1.4101	0.897013	1.29352	1.05453	1.23876	NA	NA	NA	NA	NA	NA	NA	NA	1.29684	1.57811	0.959597	1.1805	1.08222	1.38838	1.08185	1.65393	1.5837	2.05666	NA	NA	NA	NA	NA	NA	NA	NA	NA	NA	NA	NA	NA
Q9Y5C1	ANGPTL3	Angiopoietin-related protein 3 OS=Homo sapiens OX=9606 GN=ANGPTL3 PE=1 SV=1	NA	NA	NA	NA	NA	NA	NA	NA	0.874724	0.958998	1.30912	1.35416	1.20531	1.21546	1.23225	1.28094	0.751268	0.923959	0.908337	0.869827	0.999584	0.949803	1.15934	1.05468	NA	NA	NA	NA	NA	NA	NA	NA	NA	NA	1.63365	1.23371	1.78571	1.11736	1.65565	1.52404	1.50577	1.45508	1.81466	1.1959	NA	NA	NA
Q9Y619	SLC25A15	Mitochondrial ornithine transporter 1 OS=Homo sapiens OX=9606 GN=SLC25A15 PE=1 SV=1	NA	NA	NA	NA	NA	NA	NA	NA	0.731992	0.835204	0.783823	1.04391	0.797635	0.816712	0.747321	0.709168	NA	NA	NA	NA	NA	NA	NA	NA	NA	NA	NA	NA	NA	NA	NA	NA	NA	NA	NA	NA	NA	NA	NA	NA	NA	NA	NA	NA	1.70019	1.05922	2.31161
Q9Y696	CLIC4	Chloride intracellular channel protein 4 OS=Homo sapiens OX=9606 GN=CLIC4 PE=1 SV=4	NA	NA	NA	NA	NA	NA	NA	NA	0.784584	0.491921	0.797911	0.720165	0.845514	0.891867	0.924984	0.759067	1.09452	0.717823	0.609247	0.547033	0.7884	0.860412	0.80157	0.713804	NA	NA	NA	NA	NA	NA	NA	NA	NA	NA	1.11142	1.6915	1.18329	2.00583	1.49009	1.00919	1.53709	1.91627	1.41834	1.76908	1.94882	1.8662	1.76663
Q9Y6R7	FCGBP	IgGFc-binding protein OS=Homo sapiens OX=9606 GN=FCGBP PE=1 SV=3	0.827023	1.38262	1.49081	0.981731	0.918531	1.11034	1.19243	1.05446	0.757543	0.857971	0.91834	1.05139	0.911491	1.06799	1.26479	1.30261	0.963395	1.18255	1.12288	1.14425	1.038	1.1162	0.827826	1.00382	1.22697	1.12771	1.09832	1.09718	0.949803	0.975896	1.70586	1.05651	1.10137	0.952044	1.09414	0.97786	0.767692	0.673944	0.851749	0.936467	0.975964	0.994884	0.691979	0.651122	0.782086	0.729308	0.671379
Q9Y6Z7	COLEC10	Collectin-10 OS=Homo sapiens OX=9606 GN=COLEC10 PE=1 SV=2	0.989519	0.860651	1.20572	1.45569	1.18608	0.982208	1.38013	1.41265	0.97495	0.992267	0.970836	1.49123	0.923702	1.05249	1.08335	0.872726	1.07333	1.24057	1.14774	1.34499	1.11535	1.13296	1.37164	1.22256	0.819548	0.901375	1.00779	0.978131	0.994332	0.844342	1.08907	0.764771	1.09954	0.809386	0.92871	0.913135	1.19168	1.20748	0.823363	1.3763	1.02023	1.06422	0.969021	0.82188	1.32482	1.09119	1.14926
YP_009742609.1		Nsp2	NA	NA	NA	NA	NA	NA	NA	NA	NA	NA	NA	NA	NA	NA	NA	NA	NA	NA	NA	NA	NA	NA	NA	NA	0.82645	0.752363	0.827597	0.762231	4.4168	3.68177	0.737186	0.691452	0.918722	0.83318	NA	NA	NA	NA	NA	NA	NA	NA	NA	NA	NA	NA	NA
YP_009742614.1		Nsp7	NA	NA	NA	NA	NA	NA	NA	NA	0.598615	0.660394	0.714646	0.84998	0.703197	0.768811	0.735501	0.443099	NA	NA	NA	NA	NA	NA	NA	NA	NA	NA	NA	NA	NA	NA	NA	NA	NA	NA	NA	NA	NA	NA	NA	NA	NA	NA	NA	NA	NA	NA	NA
Cohort 2
Accession	Gene	Description	F6	F7	F8	F9	F10	F11	F12	F13	F14	S8	S9	S10	S11	S12	S13	M11	M12	M13	M14	M15	M16	H9	H10	H11	H12	H13
A0A075B6H9	IGLV4-69	Immunoglobulin lambda variable 4-69 OS=Homo sapiens OX=9606 GN=IGLV4-69 PE=1 SV=1	0.578986	0.889582	0.855595	0.773675	1.00092	0.600405	1.32592	1.27549	1.25189	0.727591	0.651589	0.551316	0.932967	0.870619	1.32228	0.896702	0.72038	2.23994	0.505153	1.0144	1.01286	0.640208	0.621808	0.620892	0.703083	1.06334
A0A075B6I0	IGLV8-61	Immunoglobulin lambda variable 8-61 OS=Homo sapiens OX=9606 GN=IGLV8-61 PE=3 SV=7	1.23055	1.2163	1.11003	0.989245	0.768573	1.41164	1.71627	1.68423	1.48634	1.94639	1.57113	1.55539	0.988235	1.38647	1.06243	1.54114	2.05069	1.44491	1.03773	1.11884	1.32207	0.675551	1.84434	2.8895	1.29701	2.85691
A0A075B6I1	IGLV4-60	Immunoglobulin lambda variable 4-60 OS=Homo sapiens OX=9606 GN=IGLV4-60 PE=3 SV=1	1.12896	1.4062	1.49443	1.21951	0.736305	0.773261	1.49126	1.00279	1.48384	0.150455	1.08736	0.791879	1.1508	0.899324	0.651929	0.507859	3.84	1.58487	0.879828	0.541831	1.36601	0.892558	0.457021	1.49338	0.934287	0.581378
A0A075B6I4	IGLV10-54	Immunoglobulin lambda variable 10-54 OS=Homo sapiens OX=9606 GN=IGLV10-54 PE=3 SV=1	0.784475	1.10137	1.12865	0.988697	NA	NA	1.49125	1.78926	2.58282	2.05651	NA	NA	0.991794	1.25248	2.88414	1.43834	NA	NA	NA	1.79785	7.47211	NA	NA	NA	0.523775	2.656
A0A075B6I9	IGLV7-46	Immunoglobulin lambda variable 7-46 OS=Homo sapiens OX=9606 GN=IGLV7-46 PE=3 SV=4	1.06349	1.33182	1.27474	1.08282	0.878848	1.13348	1.31405	1.5266	1.34787	1.0334	0.890398	0.97295	0.894551	1.03756	1.55691	1.27544	1.30919	0.960783	0.729618	1.16668	1.09362	1.15845	1.4829	1.21104	0.744523	1.90707
A0A075B6J1	IGLV5-37	Immunoglobulin lambda variable 5-37 OS=Homo sapiens OX=9606 GN=IGLV5-37 PE=3 SV=1	0.800237	1.11775	0.949935	0.719417	0.646412	1.08406	1.63851	1.88932	1.74903	NA	1.72867	0.758274	3.0234	1.32627	1.75744	1.05995	1.28588	0.74316	1.60466	1.3717	0.989828	4.849	1.89267	1.10536	0.973203	1.36769
A0A075B6J2	IGLV2-33	Probable non-functional immunoglobulin lambda variable 2-33 OS=Homo sapiens OX=9606 GN=IGLV2-33 PE=5 SV=2	0.997715	1.22417	1.17617	0.966137	NA	NA	NA	NA	NA	NA	NA	NA	NA	NA	NA	0.932063	NA	NA	NA	NA	NA	NA	NA	NA	NA	NA
A0A075B6J9	IGLV2-18	Immunoglobulin lambda variable 2-18 OS=Homo sapiens OX=9606 GN=IGLV2-18 PE=3 SV=2	1.33099	1.19094	1.36415	1.50191	1.23874	1.03962	1.19212	1.61498	1.48057	1.23046	1.0167	0.790036	1.15495	1.11895	1.32487	1.44133	1.47969	0.700955	0.884645	1.19642	1.09259	1.34901	1.48691	1.67185	1.88631	1.58074
A0A075B6K0	IGLV3-16	Immunoglobulin lambda variable 3-16 OS=Homo sapiens OX=9606 GN=IGLV3-16 PE=3 SV=2	0.885338	1.00542	1.09157	0.858863	1.12157	1.06313	0.761736	0.792897	0.789331	0.920953	1.01579	1.50159	0.769721	0.918426	0.597995	1.30785	1.23772	1.19976	1.23296	1.11778	0.955455	1.00748	0.981171	1.14384	0.791106	0.741356
A0A075B6K4	IGLV3-10	Immunoglobulin lambda variable 3-10 OS=Homo sapiens OX=9606 GN=IGLV3-10 PE=3 SV=2	0.950264	1.00083	0.949737	0.862801	0.735077	1.23774	0.897649	1.6118	0.955465	0.957603	0.959299	1.49198	1.29896	0.651093	1.36525	1.04972	0.604033	0.945769	0.829255	0.733384	1.22757	1.5722	1.2168	0.853991	0.686074	0.859111
A0A075B6K5	IGLV3-9	Immunoglobulin lambda variable 3-9 OS=Homo sapiens OX=9606 GN=IGLV3-9 PE=3 SV=1	1.27925	1.4279	1.45397	1.2349	1.15561	1.31767	1.31887	1.40409	1.26578	1.65979	1.24598	1.32526	1.49587	1.09843	1.5747	1.50995	1.3643	1.15212	1.08944	1.22964	1.24843	1.66732	1.23709	1.6241	1.61629	2.59193
A0A075B6K6	IGLV4-3	Immunoglobulin lambda variable 4-3 OS=Homo sapiens OX=9606 GN=IGLV4-3 PE=3 SV=1	NA	NA	NA	NA	0.742906	1.14793	NA	NA	NA	NA	0.74944	0.764018	NA	NA	NA	NA	0.715202	7.07228	0.963511	NA	NA	1.76666	1.27049	2.15292	NA	NA
A0A075B6Q5	IGHV3-64	Immunoglobulin heavy variable 3-64 OS=Homo sapiens OX=9606 GN=IGHV3-64 PE=3 SV=1	NA	NA	NA	NA	NA	NA	NA	NA	NA	1.06039	NA	NA	NA	NA	NA	NA	NA	NA	NA	NA	NA	NA	NA	NA	NA	NA
A0A075B6H7	IGKV3-7	Probable non-functional immunoglobulin kappa variable 3-7 OS=Homo sapiens OX=9606 GN=IGKV3-7 PE=5 SV=1	NA	NA	NA	NA	NA	NA	NA	NA	NA	0.971846	NA	NA	NA	NA	NA	NA	NA	NA	NA	NA	NA	NA	NA	NA	NA	NA
A0A075B6R2	IGHV4-4	Immunoglobulin heavy variable 4-4 OS=Homo sapiens OX=9606 GN=IGHV4-4 PE=3 SV=2	0.77148	1.03004	0.937831	0.738157	0.83858	1.48032	0.857615	1.11651	1.06089	0.722215	1.1116	1.30919	0.9288	1.20694	0.707502	1.14108	1.08846	0.817784	1.12051	0.950883	0.561954	0.763708	0.674221	0.891699	1.02656	0.787919
A0A075B6S2	IGKV2D-29	Immunoglobulin kappa variable 2D-29 OS=Homo sapiens OX=9606 GN=IGKV2D-29 PE=3 SV=1	1.30161	1.77498	1.80388	1.42603	1.12971	1.05791	1.22927	1.651	1.2314	1.51992	0.903396	0.59908	0.945747	0.992894	1.38157	0.916496	1.0546	1.02726	0.707155	1.82802	1.15169	0.742665	4.33455	1.47209	1.65273	1.88357
A0A075B6S6	IGKV2D-30	Immunoglobulin kappa variable 2D-30 OS=Homo sapiens OX=9606 GN=IGKV2D-30 PE=3 SV=1	0.973127	1.32786	1.18148	0.864238	0.911132	1.05869	1.07192	1.33494	1.16164	0.879527	1.02956	0.886306	1.08547	0.964403	1.45993	0.707744	1.83257	1.66488	1.08444	1.27534	1.32937	1.04046	1.48176	3.09095	1.58681	2.63992
A0A087WSX0	IGLV5-45	Immunoglobulin lambda variable 5-45 OS=Homo sapiens OX=9606 GN=IGLV5-45 PE=3 SV=1	NA	NA	NA	NA	0.644957	1.10939	1.55486	2.18391	1.4571	NA	11.0569	0.480483	0.729333	0.73371	2.02808	NA	1.66995	0.54889	0.46925	2.26785	1.21287	0.72573	2.94146	1.22664	0.634126	1.16387
A0A087WSY4	IGHV4-30-2	Immunoglobulin heavy variable 4-30-2 OS=Homo sapiens OX=9606 GN=IGHV4-30-2 PE=3 SV=1	0.828515	1.13233	0.912692	0.681554	NA	NA	NA	NA	NA	0.889397	NA	NA	NA	NA	NA	0.82955	NA	NA	NA	NA	NA	NA	NA	NA	NA	NA
A0A087WSY6	IGKV3D-15	Immunoglobulin kappa variable 3D-15 OS=Homo sapiens OX=9606 GN=IGKV3D-15 PE=3 SV=6	0.888719	1.06622	1.06297	0.725728	1.05157	1.64433	1.56433	1.96003	2.05084	1.47744	1.29385	1.00724	1.16006	1.54564	1.67503	0.888535	0.952705	0.719242	1.20879	1.53947	1.15774	1.35549	1.90982	1.44187	1.40264	1.52849
A0A087WSZ0	IGKV1D-8	Immunoglobulin kappa variable 1D-8 OS=Homo sapiens OX=9606 GN=IGKV1D-8 PE=3 SV=6	NA	NA	NA	NA	NA	NA	NA	NA	NA	0.980711	NA	NA	NA	NA	NA	NA	NA	NA	NA	NA	NA	NA	NA	NA	NA	NA
A0A0A0MRZ9	IGLV5-52	Immunoglobulin lambda variable 5-52 OS=Homo sapiens OX=9606 GN=IGLV5-52 PE=3 SV=1	0.579588	1.13179	0.977386	0.789439	NA	NA	1.40728	1.13335	1.49853	NA	NA	NA	1.09882	0.923424	1.40034	1.20514	NA	NA	NA	1.32123	1.2043	NA	NA	NA	3.34619	2.17608
A0A0A0MS14	IGHV1-45	Immunoglobulin heavy variable 1-45 OS=Homo sapiens OX=9606 GN=IGHV1-45 PE=3 SV=1	1.32859	0.865557	0.86814	1.04608	0.242893	0.445776	1.10913	1.05282	1.22759	NA	0.334368	0.298087	1.91394	0.913145	1.56537	2.0858	0.287909	0.330171	0.228922	1.04468	1.11596	0.414968	0.337459	0.429722	1.32852	1.55427
A0A0A0MS15	IGHV3-49	Immunoglobulin heavy variable 3-49 OS=Homo sapiens OX=9606 GN=IGHV3-49 PE=3 SV=1	0.489574	0.782141	0.690159	0.593944	0.477808	1.40672	1.01778	1.21976	1.09549	1.06585	0.606706	0.895055	0.82243	0.981246	1.12186	0.698291	1.02399	0.762843	0.852705	0.847509	0.848204	0.621938	1.37521	0.889791	1.28151	1.17748
A0A0A0MT36	IGKV6D-21	Immunoglobulin kappa variable 6D-21 OS=Homo sapiens OX=9606 GN=IGKV6D-21 PE=3 SV=1	1.04529	1.40153	1.28824	1.10129	1.1179	1.36088	1.40597	2.03793	1.39043	1.1778	1.39446	1.44119	0.983953	0.986674	1.34222	1.14013	1.4732	1.75534	1.58409	1.65511	1.01031	1.45297	3.19718	0.974368	1.49278	1.18164
A0A0A0MT89	IGKJ1	Immunoglobulin kappa joining 1 OS=Homo sapiens OX=9606 GN=IGKJ1 PE=4 SV=2	0.826737	1.20514	1.07915	0.730472	0.941528	1.333	1.04579	1.45801	1.4541	1.19251	1.8191	1.16427	0.829102	1.04499	1.34368	1.07968	1.24899	1.04682	0.813416	1.04057	0.931252	1.2093	1.06886	1.03222	0.826978	0.766768
A0A0B4J1U3	IGLV1-36	Immunoglobulin lambda variable 1-36 OS=Homo sapiens OX=9606 GN=IGLV1-36 PE=1 SV=5	0.282261	0.603866	0.517059	0.412939	1.05839	0.932061	0.91838	1.10849	1.32993	1.08915	0.943041	0.876731	0.971755	1.07143	1.45721	0.446645	1.15743	0.659072	0.909335	0.71747	1.12406	1.23863	1.50588	2.19258	0.974559	1.64394
A0A0B4J1U7	IGHV6-1	Immunoglobulin heavy variable 6-1 OS=Homo sapiens OX=9606 GN=IGHV6-1 PE=3 SV=1	0.809218	1.01811	1.00765	0.999861	0.616967	1.11868	1.02156	1.19412	1.26917	1.79577	0.741974	0.573715	1.06355	0.894261	1.18375	1.43256	0.942859	0.877596	0.558609	1.73764	0.877535	0.95303	1.16304	0.800609	1.33277	1.05442
A0A0B4J1V0	IGHV3-15	Immunoglobulin heavy variable 3-15 OS=Homo sapiens OX=9606 GN=IGHV3-15 PE=3 SV=1	0.703587	1.07773	1.01459	0.860055	0.991241	1.42648	1.18182	1.26902	1.49735	1.17878	0.796577	1.4504	0.672368	0.942074	0.953231	1.04645	0.938519	0.585436	0.695143	1.04868	1.03593	0.795545	1.05245	1.03788	1.01534	1.13707
A0A0B4J1V1	IGHV3-21	Immunoglobulin heavy variable 3-21 OS=Homo sapiens OX=9606 GN=IGHV3-21 PE=1 SV=1	NA	NA	NA	NA	NA	NA	1.85621	0.96535	1.5469	1.38405	NA	NA	1.07587	1.28156	1.12278	NA	NA	NA	NA	1.00093	0.955507	NA	NA	NA	0.866327	0.915293
A0A0B4J1V2	IGHV2-26	Immunoglobulin heavy variable 2-26 OS=Homo sapiens OX=9606 GN=IGHV2-26 PE=3 SV=1	0.49216	0.809386	0.743446	0.751893	0.50122	0.829158	0.978072	1.28776	1.04565	1.69525	0.795298	0.730623	0.948641	1.10258	0.852989	0.971712	0.394057	0.552112	0.569264	0.836811	0.836323	0.793584	0.982437	0.745392	0.986735	0.992119
A0A0B4J1V6	IGHV3-73	Immunoglobulin heavy variable 3-73 OS=Homo sapiens OX=9606 GN=IGHV3-73 PE=3 SV=1	0.824219	1.28067	1.21344	0.94737	0.602999	1.13306	0.880635	1.43269	1.11733	1.29612	0.737888	1.60078	0.903518	0.783673	0.972846	1.25327	0.806508	0.588643	0.908694	0.819112	3.50232	0.571051	1.47344	1.07842	0.88022	0.993474
A0A0B4J1X5	IGHV3-74	Immunoglobulin heavy variable 3-74 OS=Homo sapiens OX=9606 GN=IGHV3-74 PE=3 SV=1	0.608066	0.814169	0.914402	0.960994	0.612925	1.04238	1.3097	1.48816	1.25075	0.826851	0.741286	0.784362	0.809819	1.02269	1.04033	0.730775	0.823081	0.811676	0.724075	1.96727	1.05286	1.19057	0.983547	0.838016	0.945819	0.924408
A0A0B4J1X8	IGHV3-43	Immunoglobulin heavy variable 3-43 OS=Homo sapiens OX=9606 GN=IGHV3-43 PE=3 SV=1	0.415034	0.762072	0.789549	0.59704	0.626989	0.759962	0.27069	0.308566	0.234674	0.478171	1.04043	0.750377	0.213644	0.213624	0.239499	0.755708	0.807919	0.647834	0.677973	0.161754	0.181986	0.767715	0.796022	0.894536	0.259412	0.195859
A0A0B4J1Y8	IGLV9-49	Immunoglobulin lambda variable 9-49 OS=Homo sapiens OX=9606 GN=IGLV9-49 PE=1 SV=1	0.813774	0.773461	0.767799	0.759383	1.0293	1.39992	1.44384	1.89996	1.11286	1.92706	1.24957	0.849308	1.03993	1.23161	0.992125	0.745562	1.96913	1.16053	0.512353	1.09205	0.885812	1.90431	2.24068	1.83013	0.847713	1.10334
A0A0B4J1Y9	IGHV3-72	Immunoglobulin heavy variable 3-72 OS=Homo sapiens OX=9606 GN=IGHV3-72 PE=3 SV=1	0.990617	1.13131	1.0442	0.823306	0.722007	1.00963	0.671636	1.16704	0.921806	1.11992	1.07364	0.797744	0.97781	0.605574	1.1095	1.1765	0.859093	0.999501	0.652679	0.694665	0.841776	1.56664	2.31418	1.52639	1.24617	1.36385
A0A0B4J2H0	IGHV1-69D	Immunoglobulin heavy variable 1-69D OS=Homo sapiens OX=9606 GN=IGHV1-69D PE=1 SV=1	1.60481	0.851336	1.4567	1.1823	0.432014	0.991147	2.20191	1.22897	1.87367	1.49247	0.903341	0.488568	2.21885	2.49673	1.04183	1.20815	0.166939	0.315019	0.287146	1.59224	0.84294	0.422527	0.218195	0.906224	0.773942	0.99727
A0A0C4DH24	IGKV6-21	Immunoglobulin kappa variable 6-21 OS=Homo sapiens OX=9606 GN=IGKV6-21 PE=3 SV=1	0.725627	1.07691	1.14346	0.90344	0.700667	1.77868	1.43829	1.8212	2.01591	0.387831	0.953609	1.38408	1.06932	1.38638	1.48205	1.52151	0.924704	0.625093	0.529349	0.971275	1.09842	3.15115	0.573452	1.98814	1.42452	1.02718
A0A0C4DH25	IGKV3D-20	Immunoglobulin kappa variable 3D-20 OS=Homo sapiens OX=9606 GN=IGKV3D-20 PE=3 SV=1	1.3724	1.43405	1.39185	0.987875	0.87089	1.27086	1.29286	1.70109	1.45319	1.45538	1.03635	0.862921	1.28017	1.17733	1.45055	1.20455	0.954664	0.721274	0.772705	1.12634	1.04372	1.0938	2.91964	0.901771	1.25832	1.04946
A0A0C4DH29	IGHV1-3	Immunoglobulin heavy variable 1-3 OS=Homo sapiens OX=9606 GN=IGHV1-3 PE=3 SV=1	0.784584	1.03605	1.186	1.25666	0.522204	1.17262	1.32501	0.990749	0.923057	1.14934	1.01218	1.10161	0.700007	0.949276	1.07221	0.951318	0.90227	0.757064	0.776812	0.810199	1.11102	0.954299	1.80775	1.12342	0.893613	0.919444
A0A0C4DH31	IGHV1-18	Immunoglobulin heavy variable 1-18 OS=Homo sapiens OX=9606 GN=IGHV1-18 PE=3 SV=1	0.554362	0.566756	0.738976	0.707303	0.779047	1.25054	0.696553	0.758964	0.82914	1.06792	1.10906	0.815943	0.634121	0.632236	0.843073	0.737441	0.956144	0.714633	0.66787	0.580542	0.574795	0.966349	1.01711	1.01342	0.6339	0.896115
A0A0C4DH32	IGHV3-20	Immunoglobulin heavy variable 3-20 OS=Homo sapiens OX=9606 GN=IGHV3-20 PE=3 SV=2	0.390691	0.664297	0.860293	0.695104	0.676088	0.801262	0.836828	1.11887	1.71826	0.872968	0.80513	1.17564	1.54699	1.15508	0.935484	0.757071	3.20463	0.536859	0.62931	1.0391	0.467978	0.692679	1.43527	0.957963	0.737574	0.468291
A0A0C4DH33	IGHV1-24	Immunoglobulin heavy variable 1-24 OS=Homo sapiens OX=9606 GN=IGHV1-24 PE=3 SV=1	0.434883	0.608193	0.630689	0.529462	0.419737	1.38771	2.66111	0.901223	0.893613	1.06157	1.27997	1.09029	3.57322	2.07485	1.58652	0.707548	0.774832	0.604755	0.913683	1.06421	1.95587	0.406658	0.628997	0.478765	0.487558	0.719051
A0A0C4DH34	IGHV4-28	Immunoglobulin heavy variable 4-28 OS=Homo sapiens OX=9606 GN=IGHV4-28 PE=3 SV=1	0.644655	0.886627	0.70023	0.65697	0.747819	1.34145	0.940805	1.68279	1.54958	0.894901	1.37016	0.845355	1.26134	1.04578	1.36793	0.840372	1.42865	0.975522	0.954002	1.133	1.01042	1.14486	1.61577	1.1896	1.79055	1.49625
A0A0C4DH35	IGHV3-35	Probable non-functional immunoglobulin heavy variable 3-35 OS=Homo sapiens OX=9606 GN=IGHV3-35 PE=5 SV=1	0.84998	1.24375	1.09134	0.908526	0.426189	0.750261	0.459366	0.852946	0.607936	1.45125	0.55713	0.610687	0.439592	0.448717	0.538308	1.11103	0.63773	0.477345	0.535326	0.499757	0.47276	0.69249	0.746873	0.699385	1.01405	0.816353
A0A0C4DH36	IGHV3-38	Probable non-functional immunoglobulin heavy variable 3-38 OS=Homo sapiens OX=9606 GN=IGHV3-38 PE=5 SV=1	0.811746	1.02797	1.02229	0.904505	0.832597	1.65801	1.04815	1.62775	1.01621	1.16975	1.34319	1.28986	0.908211	0.92123	0.946383	0.834278	1.1953	1.28987	1.44019	0.922878	0.810753	1.88747	2.22795	1.57379	1.21556	1.19607
A0A0C4DH38	IGHV5-51	Immunoglobulin heavy variable 5-51 OS=Homo sapiens OX=9606 GN=IGHV5-51 PE=3 SV=1	0.636971	0.881725	0.928324	0.900127	0.386699	0.459546	0.218414	0.452719	0.435997	0.897634	0.303677	0.314928	0.408566	0.41357	0.376699	0.761122	0.320413	0.206961	0.336055	0.310897	0.343002	0.569836	0.533037	0.595207	0.381727	0.379175
A0A0C4DH39	IGHV1-58	Immunoglobulin heavy variable 1-58 OS=Homo sapiens OX=9606 GN=IGHV1-58 PE=3 SV=1	0.837929	0.830355	1.21706	1.16991	0.401166	1.34531	1.02804	1.1595	1.18381	1.39813	1.92394	0.954967	1.22213	1.39872	0.589304	0.52239	0.864396	0.616134	1.13518	0.913147	1.46766	0.860141	0.494908	0.452905	0.430068	0.944663
A0A0C4DH43	IGHV2-70D	Immunoglobulin heavy variable 2-70D OS=Homo sapiens OX=9606 GN=IGHV2-70D PE=3 SV=1	0.464355	0.792894	0.750696	0.603991	0.434415	1.40248	0.802984	1.93581	1.08957	1.31339	0.736852	0.909042	1.68865	1.32574	1.09248	1.29074	0.906155	1.21673	0.891357	0.859892	1.07523	1.58533	1.60848	1.2049	0.757154	3.10975
A0A0C4DH67	IGKV1-8	Immunoglobulin kappa variable 1-8 OS=Homo sapiens OX=9606 GN=IGKV1-8 PE=3 SV=1	3.25668	2.74176	2.94486	2.83785	NA	NA	1.03308	1.59037	1.17234	2.02567	NA	NA	0.877583	1.68598	0.762219	1.63252	NA	NA	NA	0.605404	0.833978	NA	NA	NA	1.03614	1.04243
A0A0C4DH68	IGKV2-24	Immunoglobulin kappa variable 2-24 OS=Homo sapiens OX=9606 GN=IGKV2-24 PE=3 SV=1	0.733109	0.937181	0.933356	0.925689	0.488396	1.12016	1.50496	1.18277	1.3508	1.02307	0.882114	1.01317	0.892087	0.959276	1.11272	1.04906	0.70707	0.579926	0.631828	0.881478	1.62021	1.17749	1.44671	1.28953	1.18404	1.24102
A0A0C4DH72	IGKV1-6	Immunoglobulin kappa variable 1-6 OS=Homo sapiens OX=9606 GN=IGKV1-6 PE=3 SV=1	0.642737	1.29191	1.09528	0.828056	0.937566	1.39537	1.00375	1.39746	1.43157	1.21664	1.58923	1.01605	0.951757	1.13959	1.18249	1.65795	1.34004	0.848732	0.999439	1.38897	0.898021	1.04952	1.04927	1.25516	1.27805	1.48627
A0A0G2JMI3	IGHV1-69-2	Immunoglobulin heavy variable 1-69-2 OS=Homo sapiens OX=9606 GN=IGHV1-69-2 PE=3 SV=2	2.08942	1.71987	1.81995	1.32639	NA	NA	NA	NA	NA	NA	NA	NA	NA	NA	NA	0.61132	NA	NA	NA	NA	NA	NA	NA	NA	NA	NA
A0A0G2JS06	IGLV5-39	Immunoglobulin lambda variable 5-39 OS=Homo sapiens OX=9606 GN=IGLV5-39 PE=3 SV=1	0.958267	1.12086	1.09786	0.860114	NA	NA	NA	NA	NA	0.329146	NA	NA	NA	NA	NA	0.808097	NA	NA	NA	NA	NA	NA	NA	NA	NA	NA
A0A0J9YVY3	IGHV7-4-1	Immunoglobulin heavy variable 7-4-1 OS=Homo sapiens OX=9606 GN=IGHV7-4-1 PE=3 SV=1	0.806921	0.679008	0.58003	1.25145	NA	NA	NA	NA	NA	0.398292	NA	NA	NA	NA	NA	0.777061	NA	NA	NA	NA	NA	NA	NA	NA	NA	NA
A0A0J9YX35	IGHV3-64D	Immunoglobulin heavy variable 3-64D OS=Homo sapiens OX=9606 GN=IGHV3-64D PE=3 SV=1	0.237896	0.371311	0.315476	0.262229	9.49077	0.545073	0.30371	0.418926	0.302042	1.29092	1.01489	0.533451	0.250912	0.247084	0.326754	0.281401	0.489756	0.420913	0.441292	0.334703	0.272935	0.548465	0.62193	0.561069	0.419411	0.393678
A0A0J9YXX1	IGHV5-10-1	Immunoglobulin heavy variable 5-10-1 OS=Homo sapiens OX=9606 GN=IGHV5-10-1 PE=3 SV=1	0.292215	0.614592	0.553556	0.491376	0.405778	0.8819	1.57903	2.52316	4.23751	2.58005	0.3125	0.317907	0.683155	2.77114	2.2442	0.62842	0.467414	0.164342	0.457202	2.44965	1.59132	0.209548	0.248606	0.263066	1.53546	3.09473
A0A578	TRBV5-1	T cell receptor beta variable 5-1 OS=Homo sapiens OX=9606 GN=TRBV5-1 PE=1 SV=1	1.34901	1.17454	1.16296	1.00347	NA	NA	NA	NA	NA	1.35529	NA	NA	NA	NA	NA	1.2008	NA	NA	NA	NA	NA	NA	NA	NA	NA	NA
A0M8Q6	IGLC7	Immunoglobulin lambda constant 7 OS=Homo sapiens OX=9606 GN=IGLC7 PE=1 SV=3	0.825477	1.10213	0.980303	0.695489	0.391954	1.29948	0.727258	1.76471	1.11652	0.636706	0.891377	0.591604	1.43032	1.24502	0.765242	0.993368	1.18307	1.72345	1.4558	1.7746	0.493163	1.77717	3.47518	0.497215	1.95472	0.817
A1L4H1	SSC5D	Soluble scavenger receptor cysteine-rich domain-containing protein SSC5D OS=Homo sapiens OX=9606 GN=SSC5D PE=1 SV=3	NA	NA	NA	NA	NA	NA	NA	NA	NA	1.45882	NA	NA	NA	NA	NA	NA	NA	NA	NA	NA	NA	NA	NA	NA	NA	NA
A4FU49	SH3D21	SH3 domain-containing protein 21 OS=Homo sapiens OX=9606 GN=SH3D21 PE=2 SV=2	NA	NA	NA	NA	1.58128	1.42392	NA	NA	NA	NA	1.07545	1.07187	NA	NA	NA	NA	1.88537	1.4781	1.49159	NA	NA	2.36808	2.65414	1.31163	NA	NA
A6NGU5	GGT3P	Putative glutathione hydrolase 3 proenzyme OS=Homo sapiens OX=9606 GN=GGT3P PE=5 SV=2	NA	NA	NA	NA	NA	NA	1.01572	0.881471	1.23685	NA	NA	NA	1.70513	0.818795	0.972212	NA	NA	NA	NA	0.725731	1.75187	NA	NA	NA	0.812784	0.614123
A8MW99	MEI4	Meiosis-specific protein MEI4 OS=Homo sapiens OX=9606 GN=MEI4 PE=3 SV=2	0.692555	0.729763	0.815016	0.804018	NA	NA	NA	NA	NA	NA	NA	NA	NA	NA	NA	0.90463	NA	NA	NA	NA	NA	NA	NA	NA	NA	NA
B1AJZ9	FHAD1	Forkhead-associated domain-containing protein 1 OS=Homo sapiens OX=9606 GN=FHAD1 PE=2 SV=2	0.640469	1.05804	0.886873	0.743652	NA	NA	NA	NA	NA	NA	NA	NA	NA	NA	NA	1.04406	NA	NA	NA	NA	NA	NA	NA	NA	NA	NA
F8VTS6	RFPL4AL1	Ret finger protein-like 4A-like protein 1 OS=Homo sapiens OX=9606 GN=RFPL4AL1 PE=2 SV=1	NA	NA	NA	NA	0.724807	1.11185	0.84622	1.49388	0.866163	NA	0.937679	0.776045	0.53347	0.631776	1.05514	NA	0.88116	0.639066	0.803918	0.864008	0.746426	0.966205	0.907137	2.17156	0.863614	1.34878
O00151	PDLIM1	PDZ and LIM domain protein 1 OS=Homo sapiens OX=9606 GN=PDLIM1 PE=1 SV=4	1.10458	0.829435	1.1125	0.923702	1.14354	0.576163	0.90331	1.37844	0.743908	NA	1.22309	0.830805	1.87463	1.1933	1.6402	1.12662	0.935754	1.04281	1.40695	1.16813	1.98472	1.23467	0.845329	1.2385	0.90768	0.622284
O00161	SNAP23	Synaptosomal-associated protein 23 OS=Homo sapiens OX=9606 GN=SNAP23 PE=1 SV=1	NA	NA	NA	NA	0.678475	1.10468	0.703793	1.04879	0.980758	NA	0.975207	0.942753	0.903281	0.893766	0.904784	NA	1.08431	0.682977	0.700952	0.747045	3.26401	2.1647	1.22991	1.14114	1.12281	2.31485
O00187	MASP2	Mannan-binding lectin serine protease 2 OS=Homo sapiens OX=9606 GN=MASP2 PE=1 SV=4	1.17977	0.809106	0.972183	0.834509	2.09788	0.648151	0.85538	0.784044	0.987368	1.42573	0.807595	1.06138	0.83203	1.20582	1.09517	0.938481	0.662538	0.914203	0.402713	0.919086	1.19156	0.543112	0.728646	0.740682	1.6007	0.967507
O00194	RAB27B	Ras-related protein Rab-27B OS=Homo sapiens OX=9606 GN=RAB27B PE=1 SV=4	NA	NA	NA	NA	2.12874	1.63981	NA	NA	NA	NA	2.48016	1.74582	NA	NA	NA	NA	2.08403	2.37634	4.54081	NA	NA	1.84249	1.86547	1.21071	NA	NA
O00233	PSMD9	26S proteasome non-ATPase regulatory subunit 9 OS=Homo sapiens OX=9606 GN=PSMD9 PE=1 SV=3	0.945468	1.00968	1.03369	0.877822	NA	NA	NA	NA	NA	NA	NA	NA	NA	NA	NA	1.23362	NA	NA	NA	NA	NA	NA	NA	NA	NA	NA
O00299	CLIC1	Chloride intracellular channel protein 1 OS=Homo sapiens OX=9606 GN=CLIC1 PE=1 SV=4	1.00417	0.597496	1.05183	0.721364	1.03845	0.618068	1.11791	1.11009	1.1074	1.26655	1.21689	1.25273	1.51519	1.076	2.10453	1.09718	0.988698	1.49041	1.41522	1.14511	1.99119	0.702269	0.565976	0.618557	0.773492	0.781973
O00391	QSOX1	Sulfhydryl oxidase 1 OS=Homo sapiens OX=9606 GN=QSOX1 PE=1 SV=3	1.24169	1.13887	1.42959	1.13729	0.860326	0.815043	1.12077	1.22576	1.13987	1.10865	0.73476	0.797253	1.04662	1.28599	0.908783	1.32583	0.817683	0.744889	0.630839	1.04125	0.904773	0.856165	0.939497	1.0293	1.3596	1.21161
O00429	DNM1L	Dynamin-1-like protein OS=Homo sapiens OX=9606 GN=DNM1L PE=1 SV=2	NA	NA	NA	NA	NA	NA	NA	NA	NA	1.29289	NA	NA	NA	NA	NA	NA	NA	NA	NA	NA	NA	NA	NA	NA	NA	NA
O00468	AGRN	Agrin OS=Homo sapiens OX=9606 GN=AGRN PE=1 SV=6	NA	NA	NA	NA	NA	NA	NA	NA	NA	0.773139	NA	NA	NA	NA	NA	NA	NA	NA	NA	NA	NA	NA	NA	NA	NA	NA
O00533	CHL1	Neural cell adhesion molecule L1-like protein OS=Homo sapiens OX=9606 GN=CHL1 PE=1 SV=4	1.0893	0.895397	1.1429	1.03426	0.924809	1.01563	1.10493	1.316	0.843556	0.892361	1.01076	1.27808	1.19938	1.29185	1.06709	1.14902	1.37695	1.97172	1.74486	1.25581	1.21804	1.57623	1.97639	2.43878	1.94671	1.66508
O00592	PODXL	Podocalyxin OS=Homo sapiens OX=9606 GN=PODXL PE=1 SV=2	NA	NA	NA	NA	0.812993	0.826285	1.25379	1.21803	1.10781	1.01537	1.18649	1.56845	1.11979	1.13494	1.02863	NA	1.27973	1.18604	1.15421	1.00032	1.12746	1.46141	1.12443	1.12832	1.31399	1.36071
O00757	FBP2	Fructose-1,6-bisphosphatase isozyme 2 OS=Homo sapiens OX=9606 GN=FBP2 PE=1 SV=2	NA	NA	NA	NA	NA	NA	1.00047	0.752056	1.03587	NA	NA	NA	0.858776	0.668349	0.513882	NA	NA	NA	NA	0.62166	0.575821	NA	NA	NA	0.80744	0.626678
O14498	ISLR	Immunoglobulin superfamily containing leucine-rich repeat protein OS=Homo sapiens OX=9606 GN=ISLR PE=2 SV=1	NA	NA	NA	NA	1.13753	1.05066	1.06475	1.25405	1.11239	NA	1.20365	0.987491	1.30654	1.04659	0.984527	NA	1.30659	1.11694	1.27749	1.34058	1.10395	2.03531	1.65055	1.86453	1.83143	1.60698
O14646	CHD1	Chromodomain-helicase-DNA-binding protein 1 OS=Homo sapiens OX=9606 GN=CHD1 PE=1 SV=2	NA	NA	NA	NA	NA	NA	1.09343	1.45406	1.33816	NA	NA	NA	1.12554	1.52883	1.4376	NA	NA	NA	NA	1.16763	1.22633	NA	NA	NA	1.44066	1.03772
O14737	PDCD5	Programmed cell death protein 5 OS=Homo sapiens OX=9606 GN=PDCD5 PE=1 SV=3	NA	NA	NA	NA	NA	NA	2.24308	1.41184	1.28191	NA	NA	NA	2.53327	2.10956	2.01957	NA	NA	NA	NA	2.35824	2.27961	NA	NA	NA	2.04805	2.04865
O14745	SLC9A3R1	Na(+)/H(+) exchange regulatory cofactor NHE-RF1 OS=Homo sapiens OX=9606 GN=SLC9A3R1 PE=1 SV=4	0.979692	0.901438	1.17919	1.10565	NA	NA	0.888692	1.23064	0.971895	1.21344	NA	NA	1.76908	1.36839	1.52498	1.47529	NA	NA	NA	1.41726	1.96808	NA	NA	NA	1.1268	1.77079
O14786	NRP1	Neuropilin-1 OS=Homo sapiens OX=9606 GN=NRP1 PE=1 SV=3	1.14266	1.11304	1.31978	1.54982	1.23123	1.11994	1.09241	1.32856	1.03365	1.42306	1.02928	1.0425	1.20626	1.10304	1.05307	1.63603	1.06918	1.0443	0.883375	1.29095	0.924844	1.24714	1.46058	1.3347	1.34403	1.42265
O14791	APOL1	Apolipoprotein L1 OS=Homo sapiens OX=9606 GN=APOL1 PE=1 SV=5	1.33589	1.24954	1.40805	1.17048	0.938139	0.989997	0.801856	1.10657	0.757941	1.47131	0.747337	0.88989	2.01061	1.0759	1.27532	1.36462	1.33537	1.28059	1.33895	1.58705	1.71035	2.16659	1.58139	1.58146	2.19231	2.12107
O14818	PSMA7	Proteasome subunit alpha type-7 OS=Homo sapiens OX=9606 GN=PSMA7 PE=1 SV=1	NA	NA	NA	NA	NA	NA	1.30806	1.62512	2.24462	0.835146	NA	NA	1.57627	2.06215	1.54955	NA	NA	NA	NA	1.48599	1.41211	NA	NA	NA	1.53404	1.32268
O15031	PLXNB2	Plexin-B2 OS=Homo sapiens OX=9606 GN=PLXNB2 PE=1 SV=3	NA	NA	NA	NA	NA	NA	0.890457	1.11161	0.945976	NA	NA	NA	0.958758	0.896041	0.853554	NA	NA	NA	NA	0.855059	0.818643	NA	NA	NA	1.13062	1.24785
O15049	N4BP3	NEDD4-binding protein 3 OS=Homo sapiens OX=9606 GN=N4BP3 PE=1 SV=3	0.457359	0.995919	0.936532	0.664573	NA	NA	NA	NA	NA	1.20748	NA	NA	NA	NA	NA	1.60614	NA	NA	NA	NA	NA	NA	NA	NA	NA	NA
O15144	ARPC2	Actin-related protein 2/3 complex subunit 2 OS=Homo sapiens OX=9606 GN=ARPC2 PE=1 SV=1	NA	NA	NA	NA	0.915383	1.28392	2.24817	1.91365	2.01929	NA	1.37679	1.0883	2.57583	1.31081	2.3894	NA	1.32687	1.23309	1.54592	2.66008	1.97532	1.96515	1.64937	1.92377	0.879351	0.706189
O15204	ADAMDEC1	ADAM DEC1 OS=Homo sapiens OX=9606 GN=ADAMDEC1 PE=1 SV=2	0.868802	1.13776	1.16643	1.03018	0.981314	1.12522	1.35488	2.09827	1.50101	NA	1.26974	1.36875	1.70518	1.16903	1.85282	0.965869	1.61401	1.50562	0.94426	1.34238	1.59676	0.951768	1.475	0.900909	1.58392	1.20025
O15400	STX7	Syntaxin-7 OS=Homo sapiens OX=9606 GN=STX7 PE=1 SV=4	NA	NA	NA	NA	1.07406	1.52539	NA	NA	NA	NA	1.78968	1.37516	NA	NA	NA	NA	1.47546	1.59339	2.03568	NA	NA	1.67225	1.13514	1.49517	NA	NA
O43157	PLXNB1	Plexin-B1 OS=Homo sapiens OX=9606 GN=PLXNB1 PE=1 SV=3	NA	NA	NA	NA	0.532287	0.728913	0.784926	1.04562	0.859444	1.10696	0.806521	0.383886	0.937712	0.916725	0.75524	NA	1.623	0.297245	0.295114	0.844587	0.743404	0.373938	0.270312	0.263705	1.03277	1.03928
O43493	TGOLN2	Trans-Golgi network integral membrane protein 2 OS=Homo sapiens OX=9606 GN=TGOLN2 PE=1 SV=4	NA	NA	NA	NA	NA	NA	1.18713	0.903447	0.861615	1.20172	NA	NA	1.20854	1.71586	0.877462	NA	NA	NA	NA	1.19111	0.966948	NA	NA	NA	1.60286	1.9223
O43505	B4GAT1	Beta-1,4-glucuronyltransferase 1 OS=Homo sapiens OX=9606 GN=B4GAT1 PE=1 SV=1	1.1902	0.979217	1.20305	1.10604	0.779217	0.732382	NA	NA	NA	1.58491	0.932883	0.836252	NA	NA	NA	1.46368	1.33948	1.10909	0.907335	NA	NA	1.28933	1.15547	1.4141	NA	NA
O43665	RGS10	Regulator of G-protein signaling 10 OS=Homo sapiens OX=9606 GN=RGS10 PE=1 SV=3	1.01713	0.583579	0.809218	0.606551	1.09335	0.789459	0.943589	1.04766	1.13328	1.18954	1.44657	1.02787	2.18736	0.711574	1.75555	0.998753	1.15489	1.09711	1.98642	0.854252	2.29004	1.0285	0.664114	0.908572	0.815472	0.985033
O43707	ACTN4	Alpha-actinin-4 OS=Homo sapiens OX=9606 GN=ACTN4 PE=1 SV=2	NA	NA	NA	NA	2.17942	0.875331	1.12758	1.70018	1.2657	NA	2.10611	1.66446	2.16316	1.36376	1.52986	NA	1.876	2.89537	4.92477	1.63694	1.49705	1.30959	1.05625	0.828894	1.00795	1.20719
O43852	CALU	Calumenin OS=Homo sapiens OX=9606 GN=CALU PE=1 SV=2	NA	NA	NA	NA	0.497357	0.313008	1.5534	1.30373	1.24041	NA	0.949113	0.846299	1.50999	2.04005	1.54738	NA	0.792526	0.686911	1.76083	1.40643	1.60531	0.639321	0.704417	0.741118	1.03514	0.939081
O43866	CD5L	CD5 antigen-like OS=Homo sapiens OX=9606 GN=CD5L PE=1 SV=1	0.387267	0.438424	0.482834	0.49107	0.229089	0.344306	0.473363	0.689526	0.403782	0.597206	0.207035	0.355814	0.487679	0.481148	0.454964	0.750019	0.242856	0.440827	0.243792	0.910664	0.631508	0.517129	0.59097	0.60665	0.924398	0.552151
O60234	GMFG	Glia maturation factor gamma OS=Homo sapiens OX=9606 GN=GMFG PE=1 SV=1	0.775501	0.703294	0.757176	0.593615	1.69895	0.986691	1.0974	0.935704	0.767046	1.2869	0.907941	0.684267	1.07072	0.82819	1.1555	0.87527	0.680752	0.990148	1.08497	0.871852	1.34472	0.529414	0.401388	0.442036	0.64786	0.861379
O60239	SH3BP5	SH3 domain-binding protein 5 OS=Homo sapiens OX=9606 GN=SH3BP5 PE=1 SV=2	NA	NA	NA	NA	0.721686	1.03769	1.06056	1.15275	1.05182	NA	0.926752	0.77436	0.835957	0.967675	0.744666	NA	1.27989	0.858664	1.04377	1.17238	0.845357	1.82001	1.81875	3.14707	1.53357	2.24822
O60437	PPL	Periplakin OS=Homo sapiens OX=9606 GN=PPL PE=1 SV=4	NA	NA	NA	NA	NA	NA	0.519641	1.17751	0.743008	NA	NA	NA	0.539291	0.578778	0.63818	NA	NA	NA	NA	3.17373	0.705734	NA	NA	NA	0.62772	1.40814
O60462	NRP2	Neuropilin-2 OS=Homo sapiens OX=9606 GN=NRP2 PE=1 SV=3	NA	NA	NA	NA	1.40699	1.01167	1.21884	0.983984	1.28816	0.441749	1.26466	1.60714	1.13192	1.29212	1.20565	NA	1.05744	1.29433	0.721212	0.989879	0.935533	1.22108	0.76105	0.939105	1.05618	1.16133
O60524	NEMF	Nuclear export mediator factor NEMF OS=Homo sapiens OX=9606 GN=NEMF PE=1 SV=4	NA	NA	NA	NA	2.24144	1.45871	NA	NA	NA	NA	5.21007	2.11536	NA	NA	NA	NA	1.74409	1.48417	1.13023	NA	NA	2.1348	1.62066	2.17537	NA	NA
O75015	FCGR3B	Low affinity immunoglobulin gamma Fc region receptor III-B OS=Homo sapiens OX=9606 GN=FCGR3B PE=1 SV=2	NA	NA	NA	NA	NA	NA	NA	NA	NA	1.21319	NA	NA	NA	NA	NA	NA	NA	NA	NA	NA	NA	NA	NA	NA	NA	NA
O75083	WDR1	WD repeat-containing protein 1 OS=Homo sapiens OX=9606 GN=WDR1 PE=1 SV=4	1.02335	0.654062	0.880259	0.615402	1.03797	0.505012	1.18274	1.04995	0.946061	1.21478	0.937931	0.858064	1.20715	1.07816	1.94799	0.961527	0.587996	0.942881	0.915194	1.07133	1.92955	0.424963	0.386759	0.338184	0.687581	0.640743
O75173	ADAMTS4	A disintegrin and metalloproteinase with thrombospondin motifs 4 OS=Homo sapiens OX=9606 GN=ADAMTS4 PE=1 SV=3	0.743137	1.24057	0.714249	0.741336	NA	NA	NA	NA	NA	0.641668	NA	NA	NA	NA	NA	0.828343	NA	NA	NA	NA	NA	NA	NA	NA	NA	NA
O75347	TBCA	Tubulin-specific chaperone A OS=Homo sapiens OX=9606 GN=TBCA PE=1 SV=3	1.06644	1.17235	1.02335	0.952176	2.02786	1.07906	1.16173	1.34435	1.02301	1.57462	1.35114	1.41231	1.82209	0.893916	1.50079	1.01284	1.39293	1.47529	1.74349	1.07048	1.85268	1.68451	0.990932	1.31526	0.914832	0.890068
O75382	TRIM3	Tripartite motif-containing protein 3 OS=Homo sapiens OX=9606 GN=TRIM3 PE=1 SV=2	1.06977	1.45791	1.55639	1.3274	0.718702	1.23381	0.835743	1.18645	0.826908	1.20991	0.922957	1.06055	0.805075	0.67276	1.04449	1.85858	1.75362	1.04362	1.00339	0.654556	0.858882	1.52517	2.11273	1.64985	1.06728	1.19271
O75602	SPAG6	Sperm-associated antigen 6 OS=Homo sapiens OX=9606 GN=SPAG6 PE=2 SV=1	0.69955	0.978199	0.873755	0.685724	NA	NA	NA	NA	NA	1.29684	NA	NA	NA	NA	NA	1.2619	NA	NA	NA	NA	NA	NA	NA	NA	NA	NA
O75636	FCN3	Ficolin-3 OS=Homo sapiens OX=9606 GN=FCN3 PE=1 SV=2	1.60458	0.689537	1.22179	0.788892	1.41541	0.61443	1.17577	0.821693	1.17084	1.39387	1.33451	1.26615	0.860542	1.52747	1.43081	0.843231	0.814444	1.79083	0.698423	1.08612	1.47427	0.915975	0.96284	0.925155	1.10933	0.88017
O75874	IDH1	Isocitrate dehydrogenase [NADP] cytoplasmic OS=Homo sapiens OX=9606 GN=IDH1 PE=1 SV=2	1.56656	0.611066	0.971779	0.501458	NA	NA	1.56766	0.501025	1.35428	NA	NA	NA	0.536268	0.770248	1.07057	0.658155	NA	NA	NA	0.866449	1.06699	NA	NA	NA	0.533819	0.540867
O75882	ATRN	Attractin OS=Homo sapiens OX=9606 GN=ATRN PE=1 SV=2	0.902125	0.941348	1.03987	0.987396	0.664445	0.635661	0.719313	0.882847	0.590185	0.838045	0.55847	0.573044	0.914931	0.78813	0.752366	1.13022	0.693583	0.572441	0.605822	0.843924	0.746844	1.07576	0.900721	1.11798	1.32061	1.3954
O94986	CEP152	Centrosomal protein of 152 kDa OS=Homo sapiens OX=9606 GN=CEP152 PE=1 SV=4	NA	NA	NA	NA	NA	NA	1.46525	2.82242	2.57591	NA	NA	NA	2.74578	1.94546	2.11882	NA	NA	NA	NA	1.48146	2.6478	NA	NA	NA	1.67212	2.69881
O95428	PAPLN	Papilin OS=Homo sapiens OX=9606 GN=PAPLN PE=2 SV=4	NA	NA	NA	NA	1.12875	1.16763	1.51681	1.22006	1.2717	NA	1.03257	1.15953	1.33159	1.40821	1.52648	NA	0.987949	2.10326	0.814984	1.41837	1.35436	1.09619	1.06172	1.02756	1.76294	1.30218
O95445	APOM	Apolipoprotein M OS=Homo sapiens OX=9606 GN=APOM PE=1 SV=2	0.741645	0.730877	0.886075	0.900439	0.705378	0.440127	0.246632	0.391211	0.280152	0.621359	0.390847	0.429582	0.266268	0.296836	0.285525	0.67273	0.695511	0.493534	0.828074	0.368977	0.265022	1.21488	0.975766	1.64565	0.431882	0.357202
O95479	H6PD	GDH/6PGL endoplasmic bifunctional protein OS=Homo sapiens OX=9606 GN=H6PD PE=1 SV=2	1.32905	1.66521	1.48803	1.1674	1.19249	1.01375	1.90587	1.0023	1.19095	0.846804	1.38596	0.934434	0.894078	1.15796	0.862845	1.31942	1.00868	0.85805	0.810106	0.924251	0.950059	1.01177	0.95618	0.856005	0.850528	0.944708
O95497	VNN1	Pantetheinase OS=Homo sapiens OX=9606 GN=VNN1 PE=1 SV=2	1.00403	1.07311	1.82792	2.36149	NA	NA	NA	NA	NA	1.337	NA	NA	NA	NA	NA	1.84216	NA	NA	NA	NA	NA	NA	NA	NA	NA	NA
O95613	PCNT	Pericentrin OS=Homo sapiens OX=9606 GN=PCNT PE=1 SV=4	1.02009	0.989931	1.29226	1.20916	NA	NA	NA	NA	NA	NA	NA	NA	NA	NA	NA	1.19474	NA	NA	NA	NA	NA	NA	NA	NA	NA	NA
O95810	CAVIN2	Caveolae-associated protein 2 OS=Homo sapiens OX=9606 GN=CAVIN2 PE=1 SV=3	0.795812	0.579146	0.787854	0.567818	0.898193	0.289298	1.26546	1.351	1.18726	0.939327	1.89748	1.26087	2.0543	1.14872	2.03409	1.1456	1.09373	1.78719	2.45005	1.26148	1.93792	0.478083	0.422493	0.435625	0.851461	0.929106
P00338	LDHA	L-lactate dehydrogenase A chain OS=Homo sapiens OX=9606 GN=LDHA PE=1 SV=2	1.09149	1.08636	1.25032	1.10588	1.47894	1.17859	1.27485	1.25398	1.18415	1.06452	1.19032	1.1912	1.49373	1.15619	1.63316	0.876727	0.922556	1.06022	1.72833	1.03282	1.29584	0.925529	0.684072	1.08757	0.992182	0.832749
P00352	ALDH1A1	Retinal dehydrogenase 1 OS=Homo sapiens OX=9606 GN=ALDH1A1 PE=1 SV=2	NA	NA	NA	NA	4.7963	2.63861	0.987448	0.969636	1.15132	1.03692	1.09281	0.777091	0.894397	0.849848	0.809822	NA	0.631371	0.745676	0.506815	0.734193	0.819314	0.530322	0.474526	0.572344	0.946135	0.962646
P00367	GLUD1	Glutamate dehydrogenase 1, mitochondrial OS=Homo sapiens OX=9606 GN=GLUD1 PE=1 SV=2	NA	NA	NA	NA	NA	NA	0.639804	0.564322	3.1895	NA	NA	NA	0.541633	0.762547	0.515199	NA	NA	NA	NA	0.467943	0.688212	NA	NA	NA	0.59664	0.573328
P00441	SOD1	Superoxide dismutase [Cu-Zn] OS=Homo sapiens OX=9606 GN=SOD1 PE=1 SV=2	NA	NA	NA	NA	NA	NA	NA	NA	NA	1.3599	NA	NA	NA	NA	NA	NA	NA	NA	NA	NA	NA	NA	NA	NA	NA	NA
P00450	CP	Ceruloplasmin OS=Homo sapiens OX=9606 GN=CP PE=1 SV=1	1.07341	0.906011	0.967209	1.14306	0.910147	1.07727	1.12289	1.08097	0.737241	1.45609	1.00924	1.14385	1.01848	0.866904	0.852128	1.04384	1.23235	1.0912	0.991592	0.994869	0.949049	1.22937	1.09341	1.16175	0.942964	0.998858
P00451	F8	Coagulation factor VIII OS=Homo sapiens OX=9606 GN=F8 PE=1 SV=1	1.21377	1.08711	1.53188	1.52848	NA	NA	NA	NA	NA	1.3218	NA	NA	NA	NA	NA	0.967947	NA	NA	NA	NA	NA	NA	NA	NA	NA	NA
P00488	F13A1	Coagulation factor XIII A chain OS=Homo sapiens OX=9606 GN=F13A1 PE=1 SV=4	1.30858	0.935105	1.10481	0.96674	0.880587	0.957018	0.844171	1.00854	0.801088	1.14076	1.0862	1.0938	1.49923	0.666134	1.08094	1.01227	1.29325	1.37595	1.72888	1.12966	1.03829	1.56642	1.38807	1.59692	1.48812	1.24154
P00491	PNP	Purine nucleoside phosphorylase OS=Homo sapiens OX=9606 GN=PNP PE=1 SV=2	0.655606	0.978403	0.822963	1.05519	1.09159	0.614372	1.01925	1.15206	1.11705	1.85588	1.21979	1.10144	1.81166	1.15608	1.48596	0.991236	1.007	0.833653	0.800646	1.59781	1.57309	0.756186	1.03309	0.810186	1.17428	1.09823
P00558	PGK1	Phosphoglycerate kinase 1 OS=Homo sapiens OX=9606 GN=PGK1 PE=1 SV=3	1.21723	0.845396	1.07214	1.03018	1.72254	0.831628	1.37057	1.2138	1.33381	1.534	0.871566	0.764872	1.18487	1.24224	2.16805	1.10642	0.599076	0.788482	0.683944	1.24107	1.70316	0.747906	0.563595	0.534432	0.930356	0.997669
P00568	AK1	Adenylate kinase isoenzyme 1 OS=Homo sapiens OX=9606 GN=AK1 PE=1 SV=3	0.951912	1.2773	1.09407	1.23653	3.99757	0.679394	1.13539	0.847443	0.989172	1.46947	1.00942	0.807959	0.831902	0.832615	0.928554	1.37107	0.666367	0.834108	0.65765	1.14788	1.42031	0.654265	0.506616	0.55421	0.835711	0.561062
P00734	F2	Prothrombin OS=Homo sapiens OX=9606 GN=F2 PE=1 SV=2	1.10382	0.949276	1.11381	1.09855	0.501105	0.390675	0.538943	0.615492	0.510008	0.995781	0.472097	0.437337	0.634554	0.522098	0.572335	1.09878	0.614826	0.55065	0.52717	0.692647	0.571205	0.710423	0.657795	0.744725	0.785153	0.790641
P00736	C1R	Complement C1r subcomponent OS=Homo sapiens OX=9606 GN=C1R PE=1 SV=2	1.09786	0.678067	0.895584	0.907393	0.626024	0.593008	0.702172	0.478824	0.518664	0.855595	0.633043	0.861551	0.461322	0.622914	0.582524	0.903502	0.672982	0.808789	0.506006	0.578235	0.621614	0.877519	0.799576	0.876455	0.693573	0.561384
P00738	HP	Haptoglobin OS=Homo sapiens OX=9606 GN=HP PE=1 SV=1	1.32308	1.08162	1.10451	1.23662	0.433915	0.247973	1.57974	0.949186	1.13655	1.42553	1.17761	1.42267	0.722395	0.792061	0.769252	0.570738	0.627864	0.833199	1.16526	1.06438	0.88781	0.692411	0.459527	0.547871	0.661591	0.69633
[truncated: 781 more rows]
[truncated: 15 more columns]
